# Supplementary material for: Comparative proteome analysis in an Escherichia coli CyDisCo strain identifies stress responses related to protein production, oxidative stress and accumulation of misfolded protein
Source: Microb Cell Fact. 2019 Jan 29;18:19. doi: 10.1186/s12934-019-1071-7 (PMC6350376; doi:10.1186/s12934-019-1071-7)
Supplement: Supplementary file 1 — Additional file 1: Table S1. Average protein abundances and fold changes for proteins from cytoplasmic (A), periplasmic (B) and insoluble/membrane (C) fractions. [file 12934_2019_1071_MOESM1_ESM.xlsx]

## Sheet: Table 1A
Additional Table S1A - The E.coli CyDisCo cytoplasmic fraction
Average abundance	Values based on 3 biological replicates
Normalization	Hi3 approach (intensity of the top3 abundant peptides per protein)
													Normalized
				E.coli CyDisCo			E.coli CyDisCo sp-scFv			E.coli CyDisCo sp-scFv (misfolded)			E.coli CyDisCo			E.coli CyDisCo sp-scFv			E.coli CyDisCo sp-scFv (misfolded)			scFv VS control			mscFv VS control
Uniprot ID	Gene	Protein name	Protein subcellular localization (STEPdb)	C1	C2	C3	scFv1	scFv2	scFv3	mscFv1	mscFv2	mscFv3	C1	C2	C3	scFv1	scFv2	scFv3	mscFv1	mscFv2	mscFv3	FC	Log2 FC	p value	FC	Log2 FC	p value
scFv	scFv	scFv construct					0.0285691	0.0160603	0.0183235							0.00114925	0.000634542	0.000709246				ON	ON
P04982	rbsD	Ribose ABC transport system, high affinity permease RbsD (TC 3.A.1.2.1)	Cytoplasmic				0.00434834	0.00279026	0.00438731							0.000174922	0.000110243	0.000169819				ON	ON
P07364	cheR	Chemotaxis protein methyltransferase CheR (EC 2.1.1.80)	Cytoplasmic				0.000645237	0.00192761	0.000212216							2.59561e-05	7.61599e-05	8.21423e-06				ON	ON
P0A6D3	aroA	5-Enolpyruvylshikimate-3-phosphate synthase (EC 2.5.1.19)	Cytoplasmic				0.00152875	0.000437685	0.00031434							6.14972e-05	1.7293e-05	1.21671e-05				ON	ON
P0A6K3	def	Peptide deformylase (EC 3.5.1.88)	Inner Membrane				0.00148099	0.00277701	0.00153083							5.95761e-05	0.00010972	5.92536e-05				ON	ON
P0A6Q6	fabZ	3-hydroxyacyl-[acyl-carrier-protein] dehydratase, FabZ form (EC 4.2.1.59)	Inner Membrane				0.00160087	0.000890393	0.00133143							6.43985e-05	3.51795e-05	5.15356e-05				ON	ON
P0A821	selA	L-seryl-tRNA(Sec) selenium transferase (EC 2.9.1.1)	Cytoplasmic				0.00402021	0.006148	0.00109346							0.000161722	0.000242908	4.23246e-05				ON	ON
P0A8H6	yihI	Der GTPase-activating protein YihI (GAP)	Inner Membrane				0.0038478	0.00221646	0.0065165							0.000154786	8.75726e-05	0.000252234				ON	ON
P0A8W5	yqgE	UPF0301 protein YqgE	Cytoplasmic				0.00137658	0.00198266	0.00103045							5.53761e-05	7.8335e-05	3.98856e-05				ON	ON
P0A951	speG	Spermidine N1-acetyltransferase (EC 2.3.1.57)	Cytoplasmic				0.000655074	0.00100783	0.000821125							2.63518e-05	3.98196e-05	3.17832e-05				ON	ON
P0AAJ5	fdoH	Formate dehydrogenase O beta subunit (EC 1.2.1.2)	Inner Membrane				0.000944946	0.000420833	0.00146778							3.80126e-05	1.66272e-05	5.68131e-05				ON	ON
P0ABQ0	coaBC	Phosphopantothenoylcysteine synthetase (EC 6.3.2.5)	Cytoplasmic				0.00164941	0.00112719	0.00331586							6.63512e-05	4.45354e-05	0.000128347				ON	ON
P0AC81	gloA	Lactoylglutathione lyase (EC 4.4.1.5)	Cytoplasmic				0.00111437	0.00159497	0.0027674							4.48282e-05	6.30172e-05	0.000107117				ON	ON
P0ACB0	dnaB	Replicative DNA helicase (EC 3.6.1.-)	Cytoplasmic				0.0013927	0.00297256	0.000865482							5.60243e-05	0.000117446	3.35001e-05				ON	ON
P0ACL0	glpR	Glycerol-3-phosphate regulon repressor	Cytoplasmic				0.00229901	0.000380518	0.00109328							9.24829e-05	1.50343e-05	4.23176e-05				ON	ON
P0ACS5	zntR	Transcriptional regulator, MerR family	Cytoplasmic				0.00187286	0.000416682	0.0014678							7.53401e-05	1.64631e-05	5.68141e-05				ON	ON
P0ADB1	osmE	Osmotically-inducible lipoprotein E (Activator of ntr-like gene protein)	Outer Membrane				0.00187899	0.00330777	0.00244318							7.55863e-05	0.00013069	9.45679e-05				ON	ON
P0ADF8	ilvN	Acetolactate synthase small subunit (EC 2.2.1.6)	Cytoplasmic				0.00205822	0.00127582	0.000498922							8.27965e-05	5.04076e-05	1.93118e-05				ON	ON
P0AEA8	cysG	Siroheme synthase [Includes: Uroporphyrinogen-III C-methyltransferase (Urogen III methylase) (EC 2.1.1.107) (SUMT) (Uroporphyrinogen III methylase) (UROM); Precorrin-2 dehydrogenase (EC 1.3.1.76); Sirohydrochlorin ferrochelatase (EC 4.99.1.4)]	Cytoplasmic				0.00119522	0.00537606	0.00852901							4.80805e-05	0.000212408	0.000330132				ON	ON
P0AEG4	dsbA	Periplasmic thiol:disulfide interchange protein DsbA	Periplasmic				0.043438	0.059855	0.00305473							0.00174739	0.00236487	0.000118239				ON	ON
P0AEH3	elaA	ElaA protein	Cytoplasmic				0.000947408	0.000485653	0.000989928							3.81116e-05	1.91882e-05	3.83171e-05				ON	ON
P0AGI8	trkA	Trk system potassium uptake protein TrkA	Inner Membrane				0.00039816	0.00208993	0.000863791							1.60169e-05	8.25733e-05	3.34347e-05				ON	ON
P24202	mrr	Mrr restriction system protein (EcoKMrr)	Cytoplasmic				0.000884438	0.000679051	0.0010643							3.55785e-05	2.68294e-05	4.11957e-05				ON	ON
P25535	ubiI	2-octaprenyl-3-methyl-6-methoxy-1,4-benzoquinol hydroxylase (EC 1.14.13.-)	Inner Membrane				0.000811836	0.000653219	0.00324101							3.26579e-05	2.58087e-05	0.00012545				ON	ON
P25552	gppA	Exopolyphosphatase (EC 3.6.1.11)	Cytoplasmic				0.000564695	0.00147343	0.00201734							2.27161e-05	5.82152e-05	7.80849e-05				ON	ON
P30864	yafC	Uncharacterized HTH-type transcriptional regulator YafC	Cytoplasmic				0.00127046	0.00103896	0.00253212							5.11069e-05	4.10495e-05	9.80104e-05				ON	ON
P37342	yjjI	Uncharacterized protein YjjI	Cytoplasmic				0.00130544	0.000856687	0.00104058							5.25142e-05	3.38477e-05	4.02777e-05				ON	ON
P46118	hexR	HTH-type transcriptional regulator HexR (Hex regulon repressor)	Cytoplasmic				0.00100083	0.00108462	0.000376746							4.02605e-05	4.28533e-05	1.45827e-05				ON	ON
P63386	mlaF	Uncharacterized ABC transporter, ATP-binding protein YrbF	Inner Membrane				0.00179531	0.00234044	0.00108592							7.22205e-05	9.24708e-05	4.20325e-05				ON	ON
P64602	mlaB	Probable phospholipid ABC transporter-binding protein MlaB	Inner Membrane				0.00138569	0.000899467	0.00138044							5.57424e-05	3.5538e-05	5.34324e-05				ON	ON
P69829	ptsN	Nitrogen regulatory protein (EC 2.7.1.-) (Enzyme IIA-NTR) (PTS system EIIA component) (Phosphotransferase enzyme IIA component)	Inner Membrane				0.00188437	0.00394504	0.00193541							7.58028e-05	0.000155869	7.49139e-05				ON	ON
P77802	ecpC	CFA/I fimbrial subunit C usher protein	Periplasmic				0.00714572	0.00791206	0.0123993							0.000287453	0.000312606	0.000479937				ON	ON
Q46857	dkgA	2,5-diketo-D-gluconate reductase A (EC 1.1.1.274)	Cytoplasmic				0.00163343	0.00113148	0.00126837							6.57083e-05	4.4705e-05	4.90947e-05				ON	ON
P0ACA1	yibF	Uncharacterized GST-like protein yibF	Cytoplasmic				0.00127502	0.00076731	0.000455861	0.00295274		0.00487698				5.12904e-05	3.03165e-05	1.7645e-05	0.000115916		0.000194074	ON	ON
P0A9W6	ibaG	YrbA protein	Cytoplasmic				0.00809305	0.00582612	0.00269725	0.0137305		0.00706274				0.000325561	0.000230191	0.000104402	0.00053902		0.000281053	ON	ON
P0A996	glpC	Anaerobic glycerol-3-phosphate dehydrogenase subunit C (EC 1.1.5.3)	Inner Membrane				0.0120635	0.00277106	0.00305127	0.0127268		0.00545286				0.000485281	0.000109485	0.000118105	0.000499618		0.00021699	ON	ON
P64540	yfcL	Uncharacterized protein YfcL	Cytoplasmic				0.00381914	0.00344979	0.00136537	0.00229184		0.00399038				0.000153633	0.000136301	5.28492e-05	8.9971e-05		0.000158792	ON	ON
P0A873	trmD	tRNA (Guanine37-N1) -methyltransferase (EC 2.1.1.31)	Cytoplasmic				0.00156441	0.00126777	0.00170885	0.00120091		0.00199394				6.29317e-05	5.00895e-05	6.61442e-05	4.71445e-05		7.93466e-05	ON	ON
P32144	yihW	DeoR-type transcriptional regulator YihW	Cytoplasmic				0.000762442	0.00101964	0.000594267	0.00083377		0.000518081				3.06709e-05	4.02861e-05	2.30023e-05	3.27315e-05		2.06164e-05	ON	ON
P23331	tdk	Thymidine kinase (EC 2.7.1.21)	Cytoplasmic				0.000433791	0.00243347	0.00289999	0.00087298		0.00143726				1.74502e-05	9.61464e-05	0.00011225	3.42707e-05		5.7194e-05	ON	ON
P41407	azoR	FMN-dependent NADH-azoreductase (EC 1.7.-.-) (Azo-dye reductase) (FMN-dependent NADH-azo compound oxidoreductase)	Inner Membrane				0.00568842	0.00212838	0.00391494	0.00210745		0.00143225				0.000228829	8.40924e-05	0.000151535	8.27327e-05		5.69946e-05	ON	ON
P0AA04	ptsH	Phosphocarrier protein of PTS system	Inner Membrane	0.0571233	0.0395742	0.0633426				0.0532594	0.226931	0.0327934	0.00222354	0.00159457	0.00137032				0.00209081	0.00329419	0.00130497	OFF	OFF		1.2894	0.366702	0.491158
P0A8V6	fadR	Fatty acid metabolism regulator protein	Cytoplasmic	0.00228748	0.000787439	0.00154483				0.00281471		0.00244719	8.90409e-05	3.17284e-05	3.342e-05				0.000110498		9.73832e-05	OFF	OFF		2.02233	1.01602	0.0966418
P0AB61	yciN	Protein YciN	Cytoplasmic	0.00957055	0.00500064	0.00631426				0.0110942		0.00629901	0.000372537	0.000201492	0.000136599				0.000435528		0.000250662	OFF	OFF		1.44841	0.534474	0.451724
P0AE88	cpxR	Copper-sensing two-component system response regulator CpxR	Cytoplasmic	0.00245119		0.00319835							9.54133e-05		6.91914e-05							OFF			OFF
P0AEC3	arcB	Aerobic respiration control sensor protein ArcB (EC 2.7.13.3)	Inner Membrane	0.0271619	0.00372266	0.00879116							0.00105729	0.000149998	0.000190183							OFF	OFF		OFF	OFF
P0AEU0	hisJ	Histidine ABC transporter, histidine-binding periplasmic protein precursor HisJ (TC 3.A.1.3.1)	Periplasmic	0.00139218	0.00192894	0.00280486							5.41911e-05	7.7723e-05	6.06788e-05							OFF	OFF		OFF	OFF
P0AF06	motB	Flagellar motor rotation protein MotB	Inner Membrane	0.000833101	0.00167185	0.00525857				0.00881595		0.00977671	3.24288e-05	6.7364e-05	0.000113761				0.000346089		0.000389052	OFF	OFF		5.16363	2.36839	0.00339102
P11557	damX	Cell division protein DamX	Inner Membrane	0.000724021	0.00100589	0.00614873				0.00112179		0.00145703	2.81828e-05	4.05306e-05	0.000133018				4.40384e-05		5.79806e-05	OFF	OFF		0.758575	-0.398635	0.675109
P27431	roxA	50S ribosomal protein L16 3-hydroxylase (EC 1.14.11.47) (Ribosomal oxygenase RoxA) (ROX)	Cytoplasmic	0.000632996	0.00194247	0.0016957							2.46396e-05	7.82683e-05	3.66839e-05							OFF	OFF		OFF	OFF
P36672	treB	PTS system, trehalose-specific IIC component (EC 2.7.1.69)	Inner Membrane	0.001786	0.0100828	0.0456907				0.00359847		0.0119132	6.95207e-05	0.000406267	0.000988448				0.000141266		0.000474072	OFF	OFF		0.630367	-0.665735	0.608323
P37387	xylF	Xylose ABC transporter, periplasmic xylose-binding protein XylF	Periplasmic	0.00121041	0.00159052	0.00185927							4.71158e-05	6.4087e-05	4.02225e-05							OFF	OFF		OFF	OFF
P37685	aldB	Aldehyde dehydrogenase B (EC 1.2.1.22)	Cytoplasmic	0.000932742	0.00112049	0.000991145							3.63073e-05	4.51482e-05	2.14419e-05							OFF	OFF		OFF	OFF
P37902	gltI	Glutamate/aspartate import solute-binding protein	Periplasmic	0.00232913	0.00186868	0.00958944							9.06621e-05	7.52952e-05	0.000207453							OFF	OFF		OFF	OFF
P65367	yqcA	Hypothetical flavoprotein YqcA (clustered with tRNA pseudouridine synthase C)	Cytoplasmic	0.00302516	0.00169588	0.00087456							0.000117755	6.83324e-05	1.89198e-05							OFF	OFF		OFF	OFF
P75937	flgE	Flagellar hook protein FlgE	Outer Membrane	0.00696865	0.00886772	0.0143889							0.000271257	0.000357309	0.000311282							OFF	OFF		OFF	OFF
P76569	yfgD	Arsenate reductase (EC 1.20.4.1)	Cytoplasmic	0.00263866	0.00279385	0.0037113							0.000102711	0.000112573	8.02882e-05							OFF	OFF		OFF	OFF
P0A978	cspG	Cold shock protein CspG	Cytoplasmic	0.00119459	0.00142303		0.024232	0.0181367	0.0144997	0.0191091	0.039145	0.00111047	4.64998e-05	5.73383e-05		0.000974786	0.000716583	0.000561237	0.000750169	0.000568238	4.41898e-05	14.4623	3.85422	0.0282993	8.74821	3.12899	0.19761
P76658	hldE	ADP-heptose synthase (EC 2.7.-.-)	Cytoplasmic	0.00492316	0.00400873	0.010542	0.0398561	0.0485166	0.0214463	0.00273576	0.110023	0.0693291	0.000191636	0.000161525	0.000228061	0.0016033	0.00191689	0.000830122	0.000107398	0.00159711	0.00275887	7.48478	2.90396	0.0596823	7.67931	2.94098	0.233717
P43329	hrpA	ATP-dependent RNA helicase HrpA (EC 3.6.4.13)	Inner Membrane		0.00401924	0.00401086	0.0350683	0.00391961	0.022683	0.0172384		0.00610345		0.000161948	8.67687e-05	0.0014107	0.000154864	0.00087799	0.000676732		0.000242879	6.54977	2.71144	0.19723	3.69742	1.88652	0.359655
P13033	glpB	Anaerobic glycerol-3-phosphate dehydrogenase subunit B (EC 1.1.5.3)	Inner Membrane	0.0013871	0.000701238		0.0124965	0.00369345	0.00180318	0.00388522		0.00234554	5.39935e-05	2.82551e-05		0.000502699	0.000145929	6.97955e-05	0.000152523		9.33381e-05	5.82318	2.54181	0.274939	2.98924	1.57978	0.181947
P32176	fdoG	Formate dehydrogenase O alpha subunit (EC 1.2.1.2)	Periplasmic		0.00172859	0.00142117	0.0161178	0.0035702	0.00206522	0.00667216		0.00543003		6.96505e-05	3.07447e-05	0.000648376	0.000141059	7.99384e-05	0.00026193		0.000216082	5.773	2.52932	0.314521	4.7613	2.25135	0.0260344
P00944	xylA	Xylose isomerase (EC 5.3.1.5)	Cytoplasmic		0.000532966	0.00218784	0.00221672	0.00228557	0.0106835					2.14749e-05	4.73306e-05	8.91727e-05	9.03031e-05	0.000413524				5.74566	2.52247	0.268637
P42604	uxaA	Altronate dehydratase (EC 4.2.1.7)	Inner Membrane		0.00034249	0.000283918	0.00142045	0.00123841						1.38e-05	6.14213e-06	5.71408e-05	4.89295e-05					5.31891	2.41113	0.0168011
P15254	purL	Phosphoribosylformylglycinamidine synthase, synthetase subunit (EC 6.3.5.3)	Cytoplasmic	0.00129947	0.00113931	0.00293098	0.00468929	0.00565117	0.00888717				5.05824e-05	4.59066e-05	6.34071e-05	0.000188637	0.000223278	0.000343995				4.72751	2.24108	0.0502561	OFF	OFF
P0A828	smg	Protein Smg	Cytoplasmic		0.000714242	0.00274128		0.00776375	0.00255092					2.87791e-05	5.93033e-05		0.000306746	9.87382e-05				4.60347	2.20272	0.365141
P0AAG8	mglA	Galactose/methyl galactoside ABC transport system, ATP-binding protein MglA (EC 3.6.3.17)	Inner Membrane	0.000607212	0.00166825	0.00123855	0.00461643	0.00578352	0.00298181	0.00162772		0.00226819	2.3636e-05	6.72193e-05	2.67942e-05	0.000185706	0.000228507	0.000115417	6.38995e-05		9.026e-05	4.50176	2.17049	0.0375778	1.96549	0.974892	0.151416
P0A7B8	hslV	ATP-dependent protease HslV (EC 3.4.25.-)	Cytoplasmic	0.00641522	0.00923711	0.0233668	0.0502348	0.0248296	0.0453854	0.0295791	0.0637502	0.019861	0.000249715	0.000372193	0.000505505	0.0020208	0.000981021	0.00175673	0.00116119	0.000925413	0.000790343	4.22077	2.07751	0.0537514	2.55182	1.35152	0.0149179
P14294	topB	DNA topoisomerase III (EC 5.99.1.2)	Cytoplasmic	0.000564102	0.000301021	0.000740936	0.00115255	0.00245857	0.00131534				2.19579e-05	1.21291e-05	1.6029e-05	4.6364e-05	9.71382e-05	5.09128e-05				3.8793	1.9558	0.0931601	OFF	OFF
P0AEN1	fre	NAD(P)H-flavin reductase (EC 1.5.1.29) (EC 1.16.1.3)	Cytoplasmic	0.00391625	0.00282304	0.00683915	0.00288565	0.0216027	0.0159754	0.0147218	0.0384747	0.00714845	0.000152441	0.000113749	0.000147955	0.000116082	0.000853524	0.000618359	0.000577935	0.000558507	0.000284464	3.83432	1.93897	0.213504	3.43094	1.7786	0.0690072
P22255	cysQ	3'(2'),5'-bisphosphate nucleotidase (EC 3.1.3.7)	Inner Membrane	0.00227402		0.00222216		0.00589452	0.00700732				8.85171e-05		4.8073e-05		0.000232893	0.000271232				3.69078	1.88393	0.022388
P0A9P6	deaD	DEAD-box ATP-dependent RNA helicase CshA (EC 3.6.4.13)	Inner Membrane	0.00748364	0.0152096	0.0259595	0.0490803	0.0416235	0.0425668	0.0230317	0.0248642	0.0245941	0.000291303	0.000612843	0.000561593	0.00197437	0.00164455	0.00164763	0.000904161	0.000360935	0.000978694	3.5931	1.84523	0.00106357	1.53082	0.614309	0.321595
P14900	murD	UDP-N-acetylmuramoylalanine--D-glutamate ligase (EC 6.3.2.9)	Cytoplasmic	0.0017809	0.00103642		0.00210097	0.00690121	0.00612044				6.93223e-05	4.17606e-05		8.45163e-05	0.000272667	0.000236904				3.56543	1.83408	0.125722
P0ACI0	rob	Right origin-binding protein	Cytoplasmic	0.00246982	0.00380359	0.00476138	0.0045321	0.0110713	0.0151015	0.00260603		0.00441875	9.61386e-05	0.000153259	0.000103005	0.000182314	0.000437429	0.000584534	0.000102305		0.000175839	3.41733	1.77287	0.133853	1.18392	0.243572	0.665355
P08622	dnaJ	Chaperone protein DnaJ	Inner Membrane	0.00653384	0.00974441	0.0195971	0.0375281	0.0306786	0.0239415	0.0200729	0.0182473	0.0190249	0.000254332	0.000392634	0.000423953	0.00150965	0.00121211	0.000926703	0.000788007	0.000264883	0.000757074	3.40686	1.76844	0.0276292	1.6901	0.757112	0.280592
P77433	ykgG	Predicted L-lactate dehydrogenase, hypothetical protein subunit YkgG	Cytoplasmic	0.00409951		0.000901049	0.015672	0.00286789	0.00414867				0.000159575		1.94928e-05	0.000630442	0.000113311	0.000160582				3.36683	1.75139	0.333519
P0ACL2	exuR	Hexuronate utilization operon transcriptional repressor ExuR	Cytoplasmic	0.000694217	0.00183477	0.00229253	0.00114918	0.000830749	0.0110403	0.00365985		0.000358015	2.70226e-05	7.39289e-05	4.95953e-05	4.62282e-05	3.2823e-05	0.000427338	0.000143675		1.42468e-05	3.36367	1.75003	0.45619	1.57348	0.653963	0.733891
P60624	rplX	LSU ribosomal protein L24p (L26e)	Cytoplasmic	0.0197423	0.00690206	0.0218408	0.0645172	0.0312751	0.0312988	0.0427931	0.122799	0.0532018	0.000768477	0.000278106	0.000472491	0.00259535	0.00123568	0.00121148	0.00167994	0.00178258	0.0021171	3.31946	1.73095	0.113453	3.67304	1.87698	0.0022809
P60390	rsmH	Ribosomal RNA small subunit methyltransferase H (EC 2.1.1.199) (16S rRNA m(4)C1402 methyltransferase) (rRNA (cytosine-N(4)-)-methyltransferase RsmH)	Inner Membrane	0.00359047	0.00237336	0.0132721	0.00616836	0.0180814	0.017808	0.00268467	0.0130116	0.0144121	0.00013976	9.56304e-05	0.000287121	0.000248136	0.000714399	0.000689293	0.000105392	0.00018888	0.000573513	3.16132	1.66053	0.117367	1.66079	0.731873	0.519346
Q46851	gpr	L-glyceraldehyde 3-phosphate reductase (GAP reductase) (EC 1.1.1.-)	Cytoplasmic	0.00075388	0.00140379	0.00239698		0.00469472	0.00263282				2.93451e-05	5.65633e-05	5.18551e-05		0.000185489	0.000101908				3.12925	1.64581	0.246434	OFF	OFF
P76014	dhaL	Phosphoenolpyruvate-dihydroxyacetone phosphotransferase (EC 2.7.1.121), ADP-binding subunit DhaL	Cytoplasmic	0.00342041	0.0012207	0.00113761	0.0077775	0.00291601			0.0142108	0.00136101	0.000133141	4.91858e-05	2.46105e-05	0.000312867	0.000115212			0.000206287	5.41598e-05	3.10297	1.63365	0.363805	1.88787	0.916758	0.564687
P77536	ykgF	Predicted L-lactate dehydrogenase, Iron-sulfur cluster-binding subunit YkgF	Cytoplasmic	0.00115172	0.00278352	0.00466993	0.00177461	0.00324374	0.0153428	0.00658853		0.00628796	4.48313e-05	0.000112157	0.000101027	7.13878e-05	0.00012816	0.000593873	0.000258647		0.000250222	3.0751	1.62063	0.393749	2.95837	1.5648	0.0124073
P0A9D2	gstA	Glutathione S-transferase (EC 2.5.1.18)	Cytoplasmic	0.00901086	0.00740393	0.022463	0.0450768	0.00319238	0.0371791	0.0395608	0.114084	0.00920367	0.000350751	0.000298328	0.000485952	0.00181332	0.000126131	0.00143909	0.00155304	0.00165607	0.000366249	2.9766	1.57367	0.280598	3.15001	1.65536	0.186281
P0A8X0	yjgA	FIG138315: Putative alpha helix protein	Inner Membrane	0.00294101	0.00138639	0.00538501	0.00300804	0.00378607	0.0150207	0.0180236	0.0173764	0.00632343	0.00011448	5.58622e-05	0.000116496	0.000121005	0.000149588	0.000581405	0.000707555	0.000252239	0.000251633	2.97031	1.57061	0.332885	4.22338	2.0784	0.177622
P0AGK4	yhbY	RNA-binding protein YhbY	Cytoplasmic	0.00619666	0.00526265	0.0103715	0.0301423	0.0177973	0.0024146	0.0284641		0.025329	0.000241207	0.000212049	0.000224371	0.00121254	0.000703172	9.34619e-05	0.00111742		0.00100794	2.96502	1.56804	0.303629	4.70471	2.2341	0.0373081
P0AFR4	yciO	Hypothetical YciO protein, TsaC/YrdC paralog	Cytoplasmic	0.0030242	0.00480468	0.00718549	0.00436833	0.0251705	0.00512677	0.0033264	0.0161662	0.013776	0.000117718	0.000193596	0.000155447	0.000175726	0.000994488	0.000198442	0.000130585	0.000234672	0.0005482	2.93224	1.552	0.380252	1.95701	0.968653	0.357047
P0AF18	nagA	N-acetylglucosamine-6-phosphate deacetylase (EC 3.5.1.25)	Cytoplasmic	0.00170143	0.00152821	0.000876654		0.00426793	0.002981				6.62287e-05	6.15765e-05	1.89651e-05		0.000168626	0.000115385				2.90261	1.53735	0.116767	OFF	OFF
P25745	mnmA	tRNA-specific 2-thiouridylase MnmA	Cytoplasmic	0.00159868		0.000949493	0.00270466	0.00480808	0.00148227				6.22291e-05		2.05408e-05	0.000108801	0.000189967	5.73741e-05				2.86853	1.52031	0.180873
P0A7P5	rpmH	LSU ribosomal protein L34p	Cytoplasmic	0.014697	0.0124972	0.00190372	0.0197241	0.0188424	0.0419296	0.00833383	0.0993808	0.0119816	0.000572086	0.000503551	4.11841e-05	0.000793446	0.000744463	0.00162297	0.000327162	0.00144263	0.000476795	2.83024	1.50093	0.124683	2.01159	1.00834	0.405625
P75913	ghrA	Glyoxylate/hydroxypyruvate reductase A (EC 1.1.1.79) (EC 1.1.1.81) (2-ketoacid reductase)	Cytoplasmic	0.00145513	0.000916328			0.000652625	0.00613389				5.66416e-05	3.69218e-05			2.57853e-05	0.000237424				2.81316	1.49219	0.569323
P07762	glgB	1,4-alpha-glucan (glycogen) branching enzyme, GH-13-type (EC 2.4.1.18)	Cytoplasmic	0.00103081	0.00192764	0.0181546	0.0152184	0.00166724	0.0193561	0.0183214		0.0100582	4.01245e-05	7.76707e-05	0.000392747	0.000612193	6.58727e-05	0.000749215	0.000719248		0.000400253	2.79561	1.48317	0.285719	3.28915	1.71771	0.184485
P0AA43	rsuA	Ribosomal small subunit pseudouridine synthase A (EC 4.2.1.70)	Cytoplasmic	0.000641512	0.00159082	0.00197824		0.00398525	0.00226706	0.00583044	0.0105529		2.49711e-05	6.40992e-05	4.27962e-05		0.000157458	8.77508e-05	0.000228886	0.000153188		2.78928	1.47989	0.241051	4.34615	2.11974	0.136299
P0A8D0	nrdR	Ribonucleotide reductase transcriptional regulator NrdR	Cytoplasmic	0.00132431		0.00138409	0.00363835	0.00200931					5.15491e-05		2.99426e-05	0.000146361	7.93878e-05					2.7702	1.46999	0.254047
P0AGE0	ssb	Single-stranded DNA-binding protein	Cytoplasmic	0.0142457	0.00590128	0.00523606	0.0184875	0.0251521	0.0193191	0.00582326	0.0526396	0.00246446	0.000554519	0.000237781	0.000113274	0.000743699	0.000993762	0.000747783	0.000228605	0.000764129	9.80701e-05	2.74439	1.45648	0.0357708	1.20454	0.268487	0.813548
P00561	thrA	Aspartokinase (EC 2.7.2.4)	Inner Membrane	0.00212662	0.00275206	0.00645514	0.00521922	0.00831792	0.00966982	0.00822024		0.00404058	8.27794e-05	0.000110889	0.000139647	0.000209955	0.000328642	0.000374289	0.000322703		0.00016079	2.7388	1.45354	0.047003	2.17584	1.12157	0.344951
P0A8S1	argP	HTH-type transcriptional regulator ArgP (Inhibitor of chromosome initiation) (OriC replication inhibitor)	Cytoplasmic	0.000839972	0.000255903		0.00068154	0.00228333					3.26962e-05	1.03112e-05		2.74165e-05	9.02146e-05					2.73514	1.45161	0.433407
P0AFM6	pspA	Phage shock protein A	Inner Membrane	0.00241811	0.00292346	0.00255195	0.00323918	0.0113498	0.00387044	0.000918091		0.00134203	9.41257e-05	0.000117796	5.52074e-05	0.000130303	0.00044843	0.000149813	3.60416e-05		5.34044e-05	2.72732	1.44749	0.272057	0.502263	-0.993484	0.124759
P0AFW2	rmf	Ribosome modulation factor (RMF) (Hibernation factor RMF) (Protein E)	Cytoplasmic	0.0108053	0.00705497		0.0436111	0.0156822	0.0128695	0.00635741	0.0420095	0.0109882	0.000420601	0.000284267		0.00175435	0.000619604	0.00049814	0.000249574	0.000609819	0.000437262	2.71644	1.44172	0.268058	1.22638	0.294407	0.567043
P69874	potA	Putrescine transport ATP-binding protein PotA (TC 3.A.1.11.1)	Inner Membrane		0.000885477	0.00398453	0.00324888	0.00157658	0.00774062	0.00620826		0.000485756		3.56787e-05	8.61992e-05	0.000130693	6.22908e-05	0.000299616	0.000243719		1.93301e-05	2.6945	1.43002	0.279854	2.1583	1.10989	0.64176
P0C054	ibpA	16 kDa heat shock protein A	Cytoplasmic	0.00254018	0.00199749	0.00100918	0.00402792		0.0051283	0.00782377	0.00877699	0.00109101	9.88773e-05	8.04853e-05	2.18321e-05	0.000162032		0.000198501	0.000307139	0.000127409	4.34153e-05	2.68794	1.4265	0.0318669	2.37563	1.24831	0.358163
P13035	glpD	Aerobic glycerol-3-phosphate dehydrogenase (EC 1.1.5.3)	Inner Membrane	0.0156334	0.0227008	0.0438799	0.0658	0.0409479	0.0604134	0.0373178	0.0872054	0.040948	0.000608537	0.000914687	0.000949273	0.00264695	0.00161785	0.00233842	0.00146499	0.00126589	0.00162948	2.67067	1.4172	0.0340333	1.76354	0.818478	0.0140565
P37634	rlmJ	Protein involved in catabolism of external DNA	Cytoplasmic	0.00160496	0.000352851	0.00324809	0.00350869	0.00413512	0.00305852	0.00207001	0.00212688		5.24738e-05	4.42175e-05	6.02675e-05	0.000141145	0.000163379	0.000109679	8.12627e-05	8.46368e-05	8.13346e-05	2.63893	1.39995	0.0238527	1.69333	0.759861	0.0183633
P07650	deoA	Thymidine phosphorylase (EC 2.4.2.4)	Inner Membrane	0.00309756	0.00133737	0.00126953	0.00176758	0.00984278	0.0017421	0.0101068		0.0010488	0.000120574	5.38867e-05	2.74643e-05	7.11049e-05	0.000388889	6.74312e-05	0.000396763		4.17359e-05	2.61199	1.38515	0.4175	3.2574	1.70372	0.547694
P25397	tehB	Tellurite resistance protein TehB	Cytoplasmic	0.00138146	0.00340269	0.000841127	0.00685407	0.00288113	0.00381238	0.00180762		0.00161442	5.37739e-05	0.000137105	1.81965e-05	0.00027572	0.000113834	0.000147565	7.09622e-05		6.4244e-05	2.56902	1.36122	0.153002	0.970028	-0.043901	0.958225
P64596	yraP	Uncharacterized protein YraP	Outer Membrane	0.00302094	0.00537141	0.00723179	0.0139936	0.00623362	0.0113631	0.00586767		0.00339016	0.000117591	0.000216431	0.000156449	0.000562925	0.000246291	0.000439831	0.000230348		0.000134907	2.54663	1.34859	0.100211	1.11706	0.1597	0.768154
Q46802	ygeV	Uncharacterized sigma-54-dependent transcriptional regulator YgeV	Cytoplasmic	0.00256571	0.00226916	0.0015131		0.00896982	0.000646283				9.98713e-05	9.14317e-05	3.27335e-05		0.000354398	2.50156e-05				2.5403	1.345	0.611273	OFF	OFF
P75949	nagZ	Beta N-acetyl-glucosaminidase (EC 3.2.1.52)	Cytoplasmic	0.00148403	0.00170015	0.0038897	0.000290145	0.00870101		0.00131609		0.000376721	5.77665e-05	6.85045e-05	8.41477e-05	1.16717e-05	0.000343777		5.16658e-05		1.49912e-05	2.53387	1.34134	0.633948	0.475174	-1.07347	0.261067
P05706	srlB	PTS system, glucitol/sorbitol-specific IIA component	Inner Membrane	0.00298547	0.0027063	0.00182686	0.00731074	0.00796031	0.00144888	0.00595932		0.00546455	0.00011621	0.000109046	3.95214e-05	0.000294091	0.000314512	5.60818e-05	0.000233946		0.000217455	2.51035	1.32789	0.24502	2.55725	1.35459	0.0218956
P10121	ftsY	Signal recognition particle receptor protein FtsY (=alpha subunit) (TC 3.A.5.1.1)	Inner Membrane	0.00133214	0.00398044	0.00336903	0.00305273	0.00403814	0.0111909	0.00315472		0.00229973	5.18538e-05	0.000160385	7.28838e-05	0.000122803	0.000159547	0.000433167	0.000123845		9.15149e-05	2.50951	1.32741	0.277801	1.13299	0.180133	0.756776
P36979	rlmN	Dual-specificity RNA methyltransferase RlmN (EC 2.1.1.192) (23S rRNA (adenine(2503)-C(2))-methyltransferase) (23S rRNA m2A2503 methyltransferase) (Ribosomal RNA large subunit methyltransferase N) (tRNA (adenine(37)-C(2))-methyltransferase) (tRNA m2A37 methyltransferase)	Cytoplasmic	0.000731246		0.00313673	0.00429843	0.00100763	0.00386984	0.000612687		0.00125967	2.8464e-05		6.78582e-05	0.000172914	3.98113e-05	0.00014979	2.40524e-05		5.01271e-05	2.50904	1.32714	0.217361	0.770118	-0.376849	0.691477
P09152	narG	Respiratory nitrate reductase alpha chain (EC 1.7.99.4)	Inner Membrane	0.00216602	0.00935506	0.00868853	0.0212744	0.00799345	0.0112356	0.00309954	0.0852286	0.00848823	8.43129e-05	0.000376945	0.000187963	0.00085581	0.000315822	0.000434894	0.000121679	0.0012372	0.000337779	2.47454	1.30716	0.182206	2.61337	1.38591	0.415818
P0A9T4	tas	Protein tas	Cytoplasmic	0.00251805	0.000873213	0.00468768		0.00700996	0.00278425				9.80158e-05	3.51846e-05	0.000101411		0.000276964	0.00010777				2.45982	1.29855	0.396208	OFF	OFF
P32099	lplA	Lipoate-protein ligase A	Cytoplasmic	0.0015314	0.000168656			0.0019299	0.00222244				5.96102e-05	6.79571e-06			7.62504e-05	8.60238e-05				2.44367	1.28905	0.312898	OFF
P22106	asnB	Asparagine synthetase [glutamine-hydrolyzing] (EC 6.3.5.4)	Inner Membrane	0.00259533	0.00410063	0.00804517	0.00792332	0.0101888	0.00907794	0.00774521		0.00409515	0.000101024	0.000165228	0.000174045	0.000318733	0.000402561	0.000351379	0.000304055		0.000162961	2.43625	1.28466	0.00330972	1.59103	0.669959	0.42234
P19318	narY	Respiratory nitrate reductase beta chain (EC 1.7.99.4)	Inner Membrane	0.00694263	0.000748126	0.0124754		0.0101858	0.0133988				0.000270244	3.01444e-05	0.000269886		0.00040244	0.000518626				2.42269	1.27661	0.0716317	OFF	OFF
P75864	rlmL	Ribosomal RNA large subunit methyltransferase K/L [Includes: 23S rRNA m2G2445 methyltransferase (EC 2.1.1.173) (rRNA (guanine-N(2)-)-methyltransferase RlmL); 23S rRNA m7G2069 methyltransferase (EC 2.1.1.264) (rRNA (guanine-N(7)-)-methyltransferase RlmK)]	Cytoplasmic	0.000883521	0.00310623	0.00219604	0.00363993	0.00406803	0.00479348	0.00346118		0.00252652	3.43914e-05	0.00012516	4.75078e-05	0.000146424	0.000160728	0.000185541	0.000135876		0.00010054	2.37948	1.25065	0.0625361	1.71267	0.776246	0.238168
P30744	sdaB	L-serine dehydratase, alpha subunit (EC 4.3.1.17)	Cytoplasmic	0.000699661	0.000650835	0.00219599	0.00293881	0.001881	0.0012078	0.00163917		0.00197301	2.72346e-05	2.62242e-05	4.75067e-05	0.00011822	7.43183e-05	4.67501e-05	6.43492e-05		7.85136e-05	2.37	1.24489	0.146932	2.12245	1.08573	0.0399102
P40120	mdoD	Glucans biosynthesis protein D precursor	Periplasmic	0.00260377	0.000928177	0.00187682	0.00690472	0.0023906	0.00129794				0.000101353	3.73992e-05	4.0602e-05	0.000277758	9.44528e-05	5.02393e-05				2.35539	1.23597	0.365741	OFF	OFF
P0A8Y3	yihX	Alpha-D-glucose 1-phosphate phosphatase YihX (Alpha-D-glucose-1-P phosphatase) (EC 3.1.3.10) (Alpha-D-glucose-1-phosphatase) (Haloacid dehalogenase-like phosphatase 4) (HAD4)	Cytoplasmic	0.00215658	0.00137462		0.00342819	0.00476207					8.39456e-05	5.53879e-05		0.000137906	0.00018815					2.34011	1.22658	0.112898
P10443	dnaE	DNA polymerase III alpha subunit (EC 2.7.7.7)	Cytoplasmic	0.0157666	0.002927	0.00304404	0.0401191	0.00454063	0.00181339				0.000613719	0.000117938	6.5853e-05	0.00161388	0.000179401	7.01908e-05				2.33661	1.22442	0.557559	OFF	OFF
P0AC02	bamD	Probable component of the lipoprotein assembly complex (forms a complex with YaeT, YfgL, and NlpB)	Outer Membrane	0.000321164	0.00393969	0.00244331	0.00132449	0.004207	0.00784734				1.25014e-05	0.000158743	5.28571e-05	5.32807e-05	0.000166219	0.000303746				2.33486	1.22334	0.316558	OFF	OFF
P0A9C0	glpA	Anaerobic glycerol-3-phosphate dehydrogenase subunit A (EC 1.1.5.3)	Inner Membrane	0.00516402	0.00401821	0.00584708	0.00761684	0.007742	0.0134887	0.00384505	0.0539965	0.00520224	0.000201011	0.000161906	0.000126492	0.000306404	0.000305887	0.000522105	0.000150946	0.000783825	0.000207017	2.31788	1.21281	0.0857717	2.33299	1.22218	0.394841
P77488	dxs	1-deoxy-D-xylulose 5-phosphate synthase (EC 2.2.1.7)	Inner Membrane	0.00314654	0.0029905	0.0100128	0.00943048	0.0036544	0.013943	0.00279537	0.0167072	0.00446749	0.00012248	0.000120497	0.000216612	0.000379362	0.000144386	0.000539691	0.000109738	0.000242525	0.000177778	2.31389	1.21032	0.216377	1.1533	0.205763	0.662329
P06992	rsmA	SSU rRNA (adenine(1518)-N(6)/adenine(1519)-N(6))-dimethyltransferase (EC 2.1.1.182)	Inner Membrane	0.000753471	0.00229978		0.00614955	0.00317834	0.00119576				2.93291e-05	9.26654e-05		0.000247379	0.000125577	4.62842e-05				2.29103	1.196	0.325548
P0AC19	folX	Dihydroneopterin triphosphate epimerase	Cytoplasmic	0.00566791	0.00693793	0.00802957	0.0205183	0.0101287	0.00789702				0.000220626	0.000279552	0.000173707	0.000825393	0.000400186	0.000305669				2.27227	1.18413	0.212511	OFF	OFF
P03004	dnaA	Chromosomal replication initiator protein DnaA	Cytoplasmic		0.00247776	0.00322599	0.00878624	0.00420832	0.00149694	0.000699858		0.0029665		9.98367e-05	6.97892e-05	0.000353446	0.000166271	5.7942e-05	2.74744e-05		0.000118048	2.27032	1.1829	0.337787	0.857904	-0.221113	0.836508
P30014	rnt	Ribonuclease T (EC 3.1.13.-)	Cytoplasmic	0.00123663	0.00240192	0.00403993	0.00655218	0.00340438	0.00332329				4.81365e-05	9.67812e-05	8.73976e-05	0.000263576	0.000134507	0.000128634				2.26725	1.18095	0.145241	OFF	OFF
P12295	ung	Uracil-DNA glycosylase, family 1	Cytoplasmic	0.00226029	0.00145341	0.0102857	0.00592856	0.00459489	0.010719	0.00766608		0.00166516	8.79826e-05	5.85626e-05	0.000222514	0.00023849	0.000181544	0.000414899	0.000300949		6.6263e-05	2.26232	1.17781	0.154282	1.49249	0.577721	0.699406
P0AFX4	rsd	Regulator of sigma D	Cytoplasmic	0.00178798	0.00521124			0.00760209	0.00856018	0.00297777		0.00235542	6.95978e-05	0.000209978			0.000300359	0.000331338	0.000116899		9.3731e-05	2.25949	1.176	0.228626	0.753391	-0.408529	0.709371
P00579	rpoD	RNA polymerase sigma factor RpoD	Cytoplasmic	0.00485366	0.00553898	0.0215737	0.020254	0.018855	0.0107232	0.0104417	0.0349983	0.00883206	0.00018893	0.000223183	0.000466713	0.000814763	0.000744964	0.00041506	0.00040991	0.000508043	0.000351461	2.24707	1.16805	0.079967	1.44444	0.530512	0.278186
P39377	iadA	Asp-X dipeptidase	Cytoplasmic	0.00101411	0.000324895	0.00331911	0.000263508	0.00312845	0.00373814				3.94745e-05	1.3091e-05	7.18037e-05	1.06002e-05	0.000123605	0.000144692				2.24249	1.1651	0.344862	OFF	OFF
P0AGG4	trxC	Thioredoxin-2 (Trx-2) (EC 1.8.1.8) (Protein-disulfide reductase)	Cytoplasmic	0.00649905	0.00541294	0.0127685	0.00214056	0.0239772	0.0163644	0.00783766	0.0441993	0.0166864	0.000252978	0.000218105	0.000276226	8.61088e-05	0.00094734	0.000633416	0.000307684	0.000641608	0.000664016	2.23049	1.15736	0.347289	2.15882	1.11025	0.126295
P0A8H8	yacG	DNA gyrase inhibitor YacG	Cytoplasmic	0.00285282	0.00145789		0.00811027	0.00130018	0.00491529				0.000111047	5.87431e-05		0.000326254	5.13703e-05	0.000190256				2.22973	1.15687	0.319444
P0AEU7	skp	Outer membrane protein H precursor	Periplasmic	0.0105274	0.00747421	0.00844656	0.00952204	0.0192011	0.0219811	0.00961578	0.0186506	0.019106	0.000409782	0.00030116	0.000182728	0.000383045	0.000758636	0.000850823	0.000377488	0.000270736	0.000760302	2.22958	1.15677	0.108463	1.57611	0.656373	0.37461
P0AEW6	gsk	Inosine-guanosine kinase (EC 2.7.1.73)	Cytoplasmic		0.000565114	0.00033991		0.00119089	0.000514204					2.27703e-05	7.35342e-06		4.70522e-05	1.99032e-05				2.22268	1.1523	0.385358
P0AE78	corC	Magnesium and cobalt efflux protein CorC	Cytoplasmic	0.00191529	0.000582359	0.00383001	0.00282921	0.00480531	0.00250843	0.00219328		0.00270316	7.45532e-05	2.34651e-05	8.28563e-05	0.000113811	0.000189858	9.70937e-05	8.61019e-05		0.000107569	2.2157	1.14776	0.108965	1.60612	0.68358	0.18977
P42596	rlmG	Ribosomal RNA large subunit methyltransferase G (EC 2.1.1.174) (23S rRNA m2G1835 methyltransferase) (rRNA (guanine-N(2)-)-methyltransferase RlmG)	Cytoplasmic	0.000747123	0.000837429		0.00163168	0.00174455	0.0018163				2.9082e-05	3.37427e-05		6.56381e-05	6.89271e-05	7.03036e-05				2.17397	1.12033	0.00936173
P31057	panB	3-methyl-2-oxobutanoate hydroxymethyltransferase (EC 2.1.2.11)	Cytoplasmic	0.00459168	0.00400697	0.0134394	0.0185442	0.00807695	0.00789063	0.0123547	0.0405385	0.00723057	0.000178733	0.000161454	0.000290741	0.000745982	0.000319121	0.000305422	0.000485011	0.000588466	0.000287732	2.17224	1.11918	0.225445	2.15747	1.10934	0.0928706
P0A6H5	hslU	ATP-dependent hsl protease ATP-binding subunit HslU	Inner Membrane	0.0136487	0.0194848	0.024185	0.0388596	0.0269273	0.0344336	0.0313366	0.087252	0.0289405	0.000531282	0.000785104	0.000523205	0.00156321	0.0010639	0.00133282	0.00123019	0.00126657	0.00115165	2.15261	1.10609	0.0207415	1.98327	0.987883	0.0111086
P23845	cysN	Sulfate adenylyltransferase subunit 1 (EC 2.7.7.4)	Cytoplasmic	0.00372595	0.00425154	0.00600511	0.013141	0.00453796	0.00652685	0.0032848		0.00192999	0.000145034	0.000171308	0.000129911	0.000528624	0.000179295	0.000252634	0.000128952		7.68015e-05	2.15248	1.106	0.247299	0.691602	-0.531986	0.29587
P0A832	smpB	tmRNA-binding protein SmpB	Cytoplasmic	0.00449294	0.00523813	0.00596483	0.0105472	0.00596178	0.0115753	0.00719357	0.0115788	0.00711973	0.000174889	0.000211061	0.00012904	0.000424283	0.00023555	0.000448044	0.000282399	0.00016808	0.000283321	2.15126	1.10518	0.0856227	1.42488	0.510842	0.194382
P21507	srmB	ATP-dependent RNA helicase SrmB	Inner Membrane	0.00278904	0.0284396	0.00354256	0.012329	0.0103638	0.0496225	0.0144566		0.00439896	0.000108564	0.00114592	7.66378e-05	0.000495963	0.000409475	0.00192074	0.000567524		0.000175051	2.12315	1.0862	0.459348	0.836784	-0.257073	0.869059
P23847	dppA	Dipeptide-binding ABC transporter, periplasmic substrate-binding component (TC 3.A.1.5.2)	Periplasmic	0.0039465	0.00951466	0.0164502	0.00244688	0.00327804	0.042895	0.0313646		0.026851	0.000153619	0.000383376	0.000355874	9.8431e-05	0.000129515	0.00166033	0.00123129		0.00106851	2.11484	1.08055	0.586946	3.8636	1.94994	0.00868918
P06983	hemC	Porphobilinogen deaminase (PBG) (EC 2.5.1.61) (Hydroxymethylbilane synthase) (HMBS) (Pre-uroporphyrinogen synthase)	Cytoplasmic	0.00230896	0.00104054	0.00211858	0.004776	0.00373915	0.000920456	0.00283931		0.000829688	8.9877e-05	4.19266e-05	4.58322e-05	0.000192125	0.000147734	3.5628e-05	0.000111463		3.30164e-05	2.1138	1.07984	0.290361	1.22002	0.286909	0.798947
P0A8R0	rraA	Ribonuclease E inhibitor RraA	Cytoplasmic	0.00355367	0.00635898	0.0143411	0.0137978	0.00905485	0.0148588	0.0200518	0.0104944	0.00434275	0.000138328	0.000256224	0.000310247	0.000555046	0.000357758	0.000575139	0.000787178	0.000152339	0.000172815	2.11116	1.07804	0.0431521	1.57823	0.658305	0.585017
P0AGJ5	yfiF	Uncharacterized tRNA/rRNA methyltransferase YfiF (EC 2.1.1.-)	Inner Membrane	0.00347303	0.00378952	0.00157489		0.00624785	0.00532349	0.00355055		0.00755231	0.000135189	0.000152692	3.40704e-05		0.000246853	0.000206056	0.000139384		0.000300535	2.11015	1.07734	0.0701418	2.04963	1.03536	0.371898
P0A9K3	ybeZ	Phosphate starvation-inducible protein PhoH, predicted ATPase	Inner Membrane	0.00722501	0.0158551	0.0232552	0.0268487	0.0274195	0.0216056	0.018558	0.0565312	0.0204818	0.000281236	0.000638854	0.000503089	0.00108005	0.00108335	0.000836287	0.000728536	0.00082062	0.000815049	2.10773	1.07569	0.0184567	1.66121	0.732236	0.0851988
P28304	qorA	Quinone oxidoreductase 1 (EC 1.6.5.5) (NADPH:quinone reductase 1) (Zeta-crystallin homolog protein)	Cytoplasmic	0.00116761	0.000343333		0.000880968	0.0028983	0.000913763				4.54498e-05	1.3834e-05		3.54389e-05	0.000114512	3.5369e-05				2.08399	1.05935	0.37425
P0AES2	gudD	Glucarate dehydratase (EC 4.2.1.40)	Cytoplasmic	0.00268653	0.00340113	0.00397621		0.00395806	0.00770152				0.000104574	0.000137043	8.6019e-05		0.000156383	0.000298102				2.08075	1.0571	0.335107	OFF	OFF
P0ABH9	clpA	ATP-dependent Clp protease ATP-binding subunit ClpA	Cytoplasmic	0.00898289	0.0168993	0.0312056	0.0285016	0.0337837	0.0272452	0.0366821	0.112131	0.0230368	0.000349662	0.000680928	0.000675084	0.00114654	0.0013348	0.00105458	0.00144004	0.00162771	0.000916724	2.07303	1.05174	0.0132486	2.33601	1.22405	0.050525
P21499	rnr	3'-to-5' exoribonuclease RNase R	Inner Membrane	0.00229179	0.0244945	0.00591459	0.0441886	0.00683675	0.0115099	0.0374031		0.022122	8.92088e-05	0.000986962	0.000127953	0.00177759	0.00027012	0.000445512	0.00146834		0.000880318	2.07057	1.05003	0.492932	2.92577	1.54882	0.171108
P0A9M0	lon	ATP-dependent protease La (EC 3.4.21.53) Type I	Cytoplasmic	0.0189228	0.0308961	0.0698334	0.0579014	0.053643	0.0714558	0.0508152	0.0995282	0.0557929	0.000736577	0.0012449	0.00151074	0.00232921	0.00211944	0.00276583	0.00199486	0.00144477	0.00222021	2.06587	1.04675	0.0147385	1.6207	0.696619	0.0892355
P32695	dusA	tRNA-dihydrouridine(20/20a) synthase (EC 1.3.1.-) (EC 1.3.1.91) (U20-specific dihydrouridine synthase) (U20-specific Dus) (tRNA-dihydrouridine synthase A)	Inner Membrane	0.00182128	0.000618323		0.00282785	0.00381235	0.000807123				7.08941e-05	2.49142e-05		0.000113757	0.000150626	3.12412e-05				2.05705	1.04058	0.315964
P0DMC7	rcsB	DNA-binding capsular synthesis response regulator RcsB	Cytoplasmic	0.00323512	0.00402313	0.008858	0.00923226	0.00904591	0.00660835	0.00476409	0.0209746	0.00568697	0.000125928	0.000162105	0.000191629	0.000371388	0.000357404	0.000255789	0.000187025	0.000304472	0.000226306	2.05266	1.03749	0.0260876	1.49647	0.581567	0.134123
P76251	dmlA	D-malic enzyme (EC 1.1.1.83)	Cytoplasmic	0.0164371	0.0167004	0.0336472	0.04324	0.0370639	0.0248039	0.0310947	0.090654	0.0402864	0.000639819	0.000672914	0.000727905	0.00173942	0.0014644	0.000960081	0.00122069	0.00131595	0.00160315	2.04049	1.02892	0.0883159	2.02868	1.02054	0.021642
P0AD49	raiA	Ribosome hibernation protein YfiA	Inner Membrane	0.011646	0.0132804	0.0391127	0.0390723	0.0262842	0.028792	0.0311111	0.138887	0.0552191	0.000453323	0.000535111	0.000846143	0.00157177	0.00103849	0.00111445	0.00122133	0.00201612	0.00219738	2.03028	1.02168	0.0423251	2.96244	1.56679	0.0424239
P0ACQ4	oxyR	Hydrogen peroxide-inducible genes activator	Cytoplasmic	0.00342219	0.00340602	0.00363376	0.00968913	0.00476206	0.00314458	0.00197368		0.00123005	0.00013321	0.00013724	0.000148611	0.000389767	0.000188149	0.000121717	8.67381e-05		8.87422e-05	2.00433	1.00312	0.281931	0.628121	-0.670885	0.00593207
P0AA39	rluC	Ribosomal large subunit pseudouridine synthase C (EC 4.2.1.70)	Cytoplasmic	0.00171002	0.00170305	0.00426837	0.00457686	0.00367432	0.00323254	0.00181668	0.00192011	0.00208242	6.65632e-05	6.86215e-05	9.23396e-05	0.000184114	0.000145172	0.000125122	7.13176e-05	2.78728e-05	8.28673e-05	1.99719	0.997969	0.0316224	0.800168	-0.321624	0.477887
P15042	ligA	DNA ligase (EC 6.5.1.2)	Cytoplasmic	0.00117632	0.00128045	0.00451487	0.00391773	0.00317169	0.00264704	0.00282836		0.00206584	4.57888e-05	5.15934e-05	9.76723e-05	0.0001576	0.000125314	0.000102459	0.000111034		8.22075e-05	1.97571	0.982374	0.0504657	1.48605	0.571486	0.247795
P69922	fucI	L-fucose isomerase (EC 5.3.1.25)	Cytoplasmic		0.00116867	0.00180985	0.00205441	0.00151645	0.00287476					4.70894e-05	3.91533e-05	8.26433e-05	5.9915e-05	0.000111273				1.96215	0.972435	0.099796
P0A761	nanE	N-acetylmannosamine-6-phosphate 2-epimerase (EC 5.1.3.9)	Cytoplasmic	0.000879107	0.00172019		0.00272624	0.00196582	0.00302691	0.00256005	0.0103586	0.00135653	3.42195e-05	6.93121e-05		0.000109669	7.76698e-05	0.000117162	0.0001005	0.000150368	5.39816e-05	1.96076	0.971414	0.147592	1.963	0.973062	0.227907
P0A6L4	nanA	N-acetylneuraminate lyase (EC 4.1.3.3)	Cytoplasmic	0.00534762	0.00397214	0.0144691	0.019782	0.01035	0.00336025	0.00470112		0.00487022	0.000208158	0.00016005	0.000313017	0.000795773	0.00040893	0.000130065	0.000184553		0.000193804	1.95937	0.970386	0.376638	0.833111	-0.26342	0.490107
P75863	ycbX	Flavodoxin reductases (ferredoxin-NADPH reductases) family 1	Cytoplasmic	0.00432372	0.00377594	0.0144214	0.00850719	0.0125475	0.0100668	0.00332966		0.00263208	0.000168302	0.000152145	0.000311985	0.000342221	0.000495752	0.000389655	0.000130713		0.000104741	1.94112	0.956891	0.0442432	0.558448	-0.840504	0.203633
P0A8J8	rhlB	ATP-dependent RNA helicase RhlB	Cytoplasmic	0.00485669	0.00733956	0.0174323	0.0172589	0.0130454	0.0118629	0.0115438	0.0565988	0.0165198	0.000189049	0.000295734	0.00037712	0.000694279	0.000515425	0.000459178	0.000453177	0.000821601	0.000657385	1.93628	0.953284	0.042974	2.24174	1.16462	0.0590934
P0ADS2	zapA	Z-ring-associated protein ZapA	Inner Membrane	0.00377631	0.00388763	0.0071339	0.00853886	0.00876582	0.00484217	0.00467597		0.00136752	0.000146994	0.000156645	0.000154331	0.000343495	0.000346338	0.000187426	0.000183565		5.44189e-05	1.91554	0.937749	0.116447	0.779475	-0.359425	0.694041
P75682	yagE	Probable 2-keto-3-deoxy-galactonate aldolase YagE (Probable KDGal aldolase YagE) (EC 4.1.2.-)	Cytoplasmic	0.000631914	0.00107731		0.00236649	0.000373951	0.00217919				2.45975e-05	4.34083e-05		9.51972e-05	1.47748e-05	8.43498e-05				1.90495	0.929756	0.350233
P0A847	tgt	tRNA-guanine transglycosylase (EC 2.4.2.29)	Cytoplasmic	0.00201973	0.000685769	0.00709819		0.00443752	0.00396142				7.86186e-05	2.76318e-05	0.000153558		0.000175327	0.000153334				1.89752	0.924112	0.159939	OFF	OFF
P0ADA3	nlpD	Murein hydrolase activator NlpD	Outer Membrane		0.0010111	0.00160628	0.00185124	0.00166143	0.00191866	0.000898616		0.00129459		4.07406e-05	3.47493e-05	7.44702e-05	6.56431e-05	7.42654e-05	3.52771e-05		5.15165e-05	1.89322	0.920841	0.00645418	1.14974	0.201303	0.611966
P05793	ilvC	Ketol-acid reductoisomerase (EC 1.1.1.86)	Inner Membrane	0.00204905	0.0034596	0.00310914	0.00321873	0.00273183	0.00781864	0.00325283		0.00541052	7.97602e-05	0.000139398	6.72614e-05	0.00012948	0.000107935	0.000302635	0.000127697		0.000215305	1.88552	0.914962	0.302845	1.79632	0.845047	0.296942
P06993	malT	Transcriptional activator of maltose regulon, MalT	Cytoplasmic		0.00119627	0.00627966	0.00226823	0.00516204	0.00580101	0.00193494		0.00456646		4.82016e-05	0.000135851	9.12445e-05	0.000203953	0.000224539	7.59603e-05		0.000181717	1.88257	0.912702	0.284768	1.40002	0.485449	0.647201
P0AEX5	prkB	Phosphoribulokinase (EC 2.7.1.19) homolog, function unknown	Cytoplasmic		0.000978429	0.00197043	0.00156502	0.00135766	0.00295509					3.9424e-05	4.26271e-05	6.29565e-05	5.36411e-05	0.000114383				1.87672	0.908211	0.196391
P0A7Y8	rnpA	Ribonuclease P protein component (EC 3.1.26.5)	Cytoplasmic	0.00275963	0.00159943			0.00390544	0.00433306	0.00224777	0.00869525	0.00472054	0.00010742	6.4446e-05			0.000154304	0.000167719	8.82411e-05	0.000126222	0.000187848	1.87369	0.905884	0.152346	1.56057	0.642069	0.274602
P0A784	orn	3'-to-5' oligoribonuclease (orn)	Inner Membrane	0.00059459		0.00117069		0.00105043	0.00127344	0.00119176		0.00249326	2.31446e-05		2.53261e-05		4.15026e-05	4.92909e-05	4.6785e-05		9.92164e-05	1.87316	0.905476	0.0960386	3.01216	1.5908	0.313596
P25516	acnA	Aconitate hydratase (EC 4.2.1.3)	Cytoplasmic	0.00907107	0.00560359	0.00787716	0.0221648	0.00546539	0.00761755	0.00616245	0.0644581	0.0049693	0.000353095	0.000225787	0.00017041	0.000891628	0.000215938	0.000294852	0.00024192	0.000935688	0.000197747	1.87166	0.904317	0.416455	1.83554	0.876206	0.476784
P0ACU5	fabR	HTH-type transcriptional repressor FabR	Cytoplasmic	0.00125081	0.00123284	0.00230172	0.00375407	0.000767238	0.00245656	0.00303405		0.00233321	4.86881e-05	4.9675e-05	4.97942e-05	0.000151016	3.03136e-05	9.5086e-05	0.000119108		9.28475e-05	1.86569	0.89971	0.344995	2.14592	1.1016	0.14492
P08201	nirB	Nitrite reductase [NAD(P)H] large subunit (EC 1.7.1.4)	Cytoplasmic	0.000953652	0.00209334	0.00168503	0.00236824	0.00175843	0.0033526	0.00175113		0.00261917	3.71213e-05	8.43475e-05	3.6453e-05	9.52678e-05	6.94755e-05	0.000129769	6.87444e-05		0.000104227	1.86492	0.899117	0.12645	1.64295	0.716286	0.268785
P0A887	ubiE	Ubiquinone/menaquinone biosynthesis methyltransferase UbiE (EC 2.1.1.-)	Cytoplasmic	0.00374677	0.00987791	0.013814	0.0186564	0.00626099	0.0145664	0.00372569	0.00466179	0.00798789	0.000145844	0.000398013	0.000298845	0.000750496	0.000247372	0.000563821	0.00014626	6.76716e-05	0.000317868	1.85319	0.890012	0.242169	0.631065	-0.664139	0.375823
P05804	uidA	Beta-glucuronidase (EC 3.2.1.31)	Inner Membrane	0.00288848	0.0052396	0.00886479	0.00845598	0.00578766	0.00991772	0.00466789	0.015932	0.00585803	0.000112435	0.00021112	0.000191776	0.000340161	0.000228671	0.000383884	0.000183248	0.000231273	0.000233113	1.84874	0.886545	0.0671275	1.25673	0.329678	0.287001
P0A7B5	proB	Glutamate 5-kinase (EC 2.7.2.11)	Cytoplasmic	0.00107408	0.00188753	0.00580235	0.0043336	0.00437572	0.00265198	0.00695934		0.00209913	4.1809e-05	7.60546e-05	0.000125525	0.000174329	0.000172885	0.00010265	0.000273204		8.35324e-05	1.84834	0.886227	0.11233	2.19856	1.13656	0.486133
P0ABT2	dps	Iron-binding ferritin-like antioxidant protein	Cytoplasmic	0.106245	0.117045	0.117495	0.178609	0.135528	0.216134	0.196254	0.640199	0.174887	0.00413562	0.00471613	0.00254183	0.00718493	0.00535473	0.00836588	0.00770436	0.00929327	0.00695942	1.83485	0.875664	0.0483237	2.10268	1.07223	0.0115619
P0ACP7	purR	Purine nucleotide synthesis repressor	Cytoplasmic	0.00131181	0.00327437	0.00515973	0.0055877	0.00354641	0.00449912	0.00745644		0.00371127	5.10625e-05	0.000131935	0.000111623	0.000224778	0.000140119	0.000174147	0.000292719		0.000147685	1.82962	0.871545	0.0779329	2.24223	1.16493	0.321127
P52643	ldhA	D-lactate dehydrogenase (EC 1.1.1.28)	Cytoplasmic	0.00482898	0.00678681	0.00725715	0.0126922	0.00852315	0.00730402	0.0118233		0.00849816	0.00018797	0.000273463	0.000156997	0.000510572	0.00033675	0.000282716	0.000464149		0.000338174	1.82727	0.869691	0.11488	1.94603	0.960537	0.140638
P0A6P7	engB	GTP-binding protein EngB	Inner Membrane	0.00792466	0.00553576	0.0106937	0.0163657	0.0114659	0.00707583	0.00731413	0.0199902	0.0223249	0.00030847	0.000223054	0.000231341	0.000658345	0.000453019	0.000273884	0.000287132	0.000290183	0.000888393	1.81585	0.860646	0.197641	1.92132	0.942099	0.361756
P0ABD8	accB	Biotin carboxyl carrier protein of acetyl-CoA carboxylase	Cytoplasmic	0.0245073	0.0336198	0.0401841	0.0615925	0.0271009	0.0572792	0.0780784	0.180199	0.0275184	0.000953957	0.00135465	0.00086932	0.0024777	0.00107076	0.0022171	0.00306514	0.00261581	0.00109506	1.81425	0.859373	0.175042	2.13221	1.09235	0.175864
P0AEB2	dacA	D-alanyl-D-alanine carboxypeptidase (EC 3.4.16.4)	Inner Membrane	0.00354119	0.00493115	0.0080146	0.0074067	0.0115769	0.00434749	0.00254124	0.00737669	0.0092834	0.000137842	0.000198692	0.000173384	0.000297951	0.000457405	0.000168278	9.97619e-05	0.000107082	0.000369422	1.81134	0.857057	0.237794	1.13011	0.176469	0.828105
P76316	dcyD	D-cysteine desulfhydrase (EC 4.4.1.15)	Cytoplasmic	0.0014673		0.00083443	0.00112071	0.00261202	0.00144002				5.71151e-05		1.80516e-05	4.50831e-05	0.000103201	5.57387e-05				1.80952	0.855603	0.348444
P06612	topA	DNA topoisomerase 1 (EC 5.99.1.2) (DNA topoisomerase I) (Omega-protein) (Relaxing enzyme) (Swivelase) (Untwisting enzyme)	Cytoplasmic	0.00774388	0.0110008	0.0238617	0.0197061	0.0140696	0.02388	0.0177921	0.0609363	0.0154875	0.000301433	0.000443258	0.000516212	0.000792723	0.000555892	0.00092432	0.000698467	0.000884566	0.000616305	1.80263	0.8501	0.0681306	1.74426	0.802612	0.0392343
P17445	betB	Betaine aldehyde dehydrogenase (EC 1.2.1.8)	Cytoplasmic	0.00398528	0.00238627	0.00757197	0.0059735	0.00774982	0.00517839	0.00397217	0.0304129	0.00286586	0.000155128	9.61504e-05	0.000163808	0.000240297	0.000306196	0.00020044	0.000155936	0.000441481	0.000114043	1.79946	0.847567	0.0485207	1.71401	0.777372	0.439505
P37177	ptsP	Phosphoenolpyruvate-dependent phosphotransferase system (EC 2.7.3.9) (Enzyme I-Ntr) (EINtr) (Phosphotransferase system, enzyme I)	Inner Membrane	0.00136797	0.00295878	0.00194617	0.0062432	0.00154793	0.0018978	0.00359222		0.00104738	5.32487e-05	0.000119219	4.21023e-05	0.000251146	6.11588e-05	7.34579e-05	0.00014102		4.16793e-05	1.79784	0.846268	0.459186	1.2772	0.352989	0.763904
Q46939	yqeF	Acetyl-CoA acetyltransferase (EC 2.3.1.9)	Cytoplasmic	0.000803287	0.00043499	0.00113481	0.00129135	0.00151861	0.000500361				3.12682e-05	1.75272e-05	2.45498e-05	5.19474e-05	6.00003e-05	1.93675e-05				1.79037	0.840259	0.256159	OFF	OFF
P00722	lacZ	Beta-galactosidase (EC 3.2.1.23)	Cytoplasmic	0.0458885	0.0714739	0.134096	0.0985414	0.113474	0.131748	0.087641	0.356667	0.0979671	0.00178623	0.00287991	0.00290097	0.00396405	0.00448336	0.00509955	0.00344054	0.00517746	0.00389849	1.79024	0.840156	0.0159906	1.65407	0.726016	0.0673344
P0A6P5	der	GTP-binding protein EngA	Inner Membrane	0.00180641	0.004337	0.00680704	0.00796032	0.00511046	0.0046066	0.00438068	0.0111145	0.00382032	7.03152e-05	0.000174752	0.00014726	0.000320222	0.000201914	0.000178307	0.000171973	0.000161341	0.000152025	1.78536	0.836213	0.13697	1.23708	0.306938	0.426522
P0AAS7	ybcJ	Uncharacterized protein YbcJ	Cytoplasmic	0.00390933	0.00234204	0.00495496	0.00597986	0.00495152	0.00504646	0.00292199		0.00346069	0.000152172	9.43684e-05	0.000107193	0.000240553	0.000195635	0.000195333	0.000114709		0.000137714	1.7853	0.836168	0.0167246	1.0704	0.098144	0.718739
P00582	polA	DNA polymerase I (EC 2.7.7.7)	Inner Membrane	0.00409635	0.00580406	0.0107522	0.00986607	0.0109801	0.00738372	0.0078922	0.00196689	0.00684337	0.000159452	0.000233864	0.000232608	0.000396885	0.000433824	0.000285801	0.000309825	2.85518e-05	0.000272324	1.78378	0.834936	0.0461054	0.975679	-0.035521	0.960225
P63284	clpB	ClpB protein	Inner Membrane	0.033852	0.0241243	0.0395477	0.0474908	0.0487912	0.0457382	0.0790584	0.138539	0.0484913	0.0013177	0.000972047	0.000855553	0.00191042	0.00192774	0.00177039	0.00310361	0.00201107	0.00192965	1.78315	0.83443	0.0181008	2.23964	1.16326	0.0614603
P0A6L0	deoC	Deoxyribose-phosphate aldolase (EC 4.1.2.4)	Inner Membrane	0.00585278	0.0121401	0.0059695	0.0220719	0.00735097	0.0085311	0.0168762	0.0217927	0.0119867	0.000227821	0.000489163	0.000129141	0.000887893	0.000290437	0.000330213	0.000662513	0.000316348	0.000476997	1.78288	0.834212	0.388092	1.72062	0.782925	0.238672
P0A940	bamA	Outer membrane protein assembly factor YaeT precursor	Outer Membrane	0.0025173	0.0073952	0.0202882	0.00750283	0.0177438	0.0125293	0.00531351		0.0137666	9.79869e-05	0.000297976	0.000438903	0.000301818	0.00070106	0.000484969	0.000208593		0.000547826	1.78214	0.833608	0.226934	1.35905	0.442603	0.669147
P07004	proA	Gamma-glutamyl phosphate reductase (EC 1.2.1.41)	Inner Membrane	0.0036958	0.00448677	0.0068184	0.00510084	0.00717803	0.00903297	0.00465885	0.0587421	0.00362009	0.00014386	0.000180786	0.000147505	0.000205192	0.000283605	0.000349638	0.000182893	0.000852714	0.000144057	1.77577	0.828448	0.0902633	2.49848	1.32105	0.41306
P0ADS6	yggE	Uncharacterized protein YggE	Periplasmic	0.00266559	0.00260437	0.00281533	0.00756098	0.00099515	0.00349287				0.000103759	0.000104939	6.09053e-05	0.000304157	3.93184e-05	0.000135198				1.77548	0.828207	0.464285	OFF	OFF
P0AE01	trmJ	tRNA:Cm32/Um32 methyltransferase	Inner Membrane	0.00581903	0.00492056	0.00945991	0.00953627	0.0110164	0.00768634	0.00630222	0.0228159	0.00435072	0.000226508	0.000198265	0.00020465	0.000383618	0.00043526	0.000297515	0.000247407	0.0003312	0.000173132	1.77367	0.826742	0.0506642	1.19433	0.256202	0.467394
P0A6Z3	htpG	Chaperone protein HtpG	Inner Membrane	0.0372467	0.0421392	0.0658434	0.0733409	0.0681109	0.0634061	0.0756121	0.156748	0.0691375	0.00144984	0.00169792	0.00142442	0.0029503	0.00269106	0.00245425	0.00296832	0.0022754	0.00275124	1.77062	0.824258	0.00433111	1.74861	0.806207	0.0184261
P09147	galE	UDP-glucose 4-epimerase (EC 5.1.3.2)	Cytoplasmic	0.00158429	0.00181254	0.00294026		0.00259141	0.00339842				6.16689e-05	7.30329e-05	6.3608e-05		0.000102387	0.000131542				1.76942	0.823279	0.161277	OFF	OFF
P42632	tdcE	Pyruvate formate-lyase (EC 2.3.1.54)	Cytoplasmic	0.000717502	0.00396457	0.00263242	0.0034804	0.00573987	0.00169864	0.00606132		0.000663977	2.7929e-05	0.000159745	5.69484e-05	0.000140007	0.000226783	6.57492e-05	0.00023795		2.64222e-05	1.76819	0.822271	0.366227	1.6211	0.696975	0.717698
P46859	gntK	Gluconokinase (EC 2.7.1.12)	Cytoplasmic		0.000900961	0.00532591	0.00255607	0.00411036		0.00590796		0.00270223		3.63026e-05	0.000115218	0.000102824	0.000162401		0.00023193		0.000107532	1.75042	0.807699	0.376611	2.24037	1.16374	0.349355
P07862	ddlB	D-alanine--D-alanine ligase (EC 6.3.2.4)	Cytoplasmic	0.00322092	0.00235509	0.00173644	0.00660504	0.00202049	0.00270748	0.00392711	0.00257496	0.000855547	0.000125376	9.48942e-05	3.75652e-05	0.000265702	7.98295e-05	0.000104798	0.000154167	3.73787e-05	3.40455e-05	1.74658	0.804534	0.393833	0.874945	-0.192736	0.832559
P62623	ispH	4-hydroxy-3-methylbut-2-enyl diphosphate reductase (EC 1.17.1.2)	Cytoplasmic	0.00199639	0.00102687	0.000998738		0.00255834	0.00161835	0.000843654		0.000822825	7.77101e-05	4.13761e-05	2.16062e-05		0.00010108	6.26413e-05	3.31195e-05		3.27433e-05	1.74553	0.803665	0.28284	0.7022	-0.510045	0.484825
P0A9Q1	arcA	Aerobic respiration control protein ArcA (Dye resistance protein)	Cytoplasmic	0.0159695	0.0133553	0.0270253	0.0245427	0.0282866	0.0239079	0.0219186	0.0246267	0.0211408	0.000621618	0.000538129	0.000584651	0.000987286	0.0011176	0.0009254	0.000860463	0.000357487	0.000841273	1.73715	0.796726	0.00845235	1.18048	0.23937	0.590208
P0A7C2	lexA	SOS-response repressor and protease LexA (EC 3.4.21.88)	Cytoplasmic	0.00152918	0.00182967			0.00289689	0.00301871	0.00154248		0.000608791	5.95239e-05	7.37234e-05			0.000114456	0.000116845	6.05533e-05		2.42261e-05	1.73588	0.795667	0.0842094	0.636256	-0.652321	0.392899
P55138	ygcE	Uncharacterized sugar kinase YgcE (EC 2.7.1.-)	Cytoplasmic	0.000886172	0.00127793	0.00113115	0.00173661	0.00145614		0.0024062		0.000745406	3.44946e-05	5.1492e-05	2.44708e-05	6.9859e-05	5.75324e-05		9.44606e-05		2.96625e-05	1.72996	0.790741	0.0754781	1.68558	0.753245	0.576158
P0A7S3	rpsL	SSU ribosomal protein S12p (S23e)	Cytoplasmic	0.132756	0.111648	0.165639	0.151296	0.184899	0.243674	0.149131	0.720789	0.227078	0.00516759	0.00449864	0.00358335	0.00608624	0.00730539	0.00943188	0.00585445	0.0104631	0.00903629	1.72258	0.784574	0.0639587	1.91356	0.936259	0.0851585
P45748	tsaC	TsaC protein (YrdC domain) required for threonylcarbamoyladenosine t(6)A37 modification in tRNA	Cytoplasmic	0.00157439	0.000820937			0.00266194	0.00143791				6.12837e-05	3.30782e-05			0.000105173	5.5657e-05				1.7044	0.769265	0.389215
P0A8N5	lysU	Lysine--tRNA ligase, heat inducible (EC 6.1.1.6) (Lysyl-tRNA synthetase) (LysRS)	Cytoplasmic	0.0102753	0.00693654	0.0121444	0.0155376	0.00994412	0.0150714	0.0138334	0.0286413	0.00876451	0.000399969	0.000279496	0.000262725	0.000625036	0.000392893	0.000583368	0.00054306	0.000415764	0.000348773	1.69955	0.765152	0.0710871	1.38783	0.47283	0.168934
Q46803	ygeW	Uncharacterized protein YgeW	Cytoplasmic	0.00167088		0.00340597		0.00402431	0.00197597				6.50395e-05		7.36829e-05		0.000159001	7.64839e-05				1.69753	0.763434	0.448012
P0A6H1	clpX	ATP-dependent Clp protease ATP-binding subunit ClpX	Cytoplasmic	0.0128828	0.0151053	0.0357444	0.0292585	0.0300372	0.0212217	0.028093	0.083414	0.0141018	0.000501468	0.000608639	0.000773274	0.00117699	0.00118677	0.000821426	0.00110285	0.00121086	0.000561162	1.69121	0.758052	0.0474173	1.52644	0.610172	0.236736
P0A8B5	ybaB	FIG000557: hypothetical protein co-occurring with RecR	Cytoplasmic	0.00206391	0.00336137	0.00404868	0.0050451	0.00448929	0.00341587				8.03385e-05	0.00013544	8.75869e-05	0.00020295	0.000177372	0.000132218				1.68951	0.756606	0.0627704	OFF	OFF
P0A7B1	ppk	Polyphosphate kinase (EC 2.7.4.1)	Inner Membrane	0.00372855	0.00162967	0.00556016	0.0038977	0.00394401	0.00632625				0.000145135	6.56647e-05	0.000120285	0.000156794	0.000155828	0.00024487				1.68383	0.751747	0.119553	OFF	OFF
P31068	fliH	Flagellar assembly protein FliH	Cytoplasmic	0.00364609	0.00348028		0.00829563	0.00178218	0.00792644	0.00496153		0.00399157	0.000141926	0.000140232		0.00033371	7.04141e-05	0.000306808	0.000194776		0.00015884	1.67975	0.748251	0.370241	1.25326	0.325682	0.296066
P11875	argS	Arginyl-tRNA synthetase (EC 6.1.1.19)	Cytoplasmic	0.00472688	0.00808072	0.00818302	0.0111707	0.00751503	0.0103298	0.0202211	0.103069	0.00449048	0.000183995	0.000325598	0.000177027	0.000449367	0.000296919	0.000399833	0.000793821	0.00149618	0.000178693	1.66922	0.739173	0.0815109	3.59542	1.84616	0.257856
P0A6N8	yeiP	Translation elongation factor P-related protein	Cytoplasmic	0.00693789	0.00413421	0.00644154	0.0105702	0.00806757	0.00553924	0.00197824	0.0129357	0.00685306	0.00027006	0.000166581	0.000139353	0.000425209	0.00031875	0.000214407	7.766e-05	0.000187777	0.000272709	1.66385	0.734525	0.165919	0.934294	-0.0980522	0.864939
P52061	rdgB	Nucleoside 5-triphosphatase RdgB (dHAPTP, dITP, XTP-specific) (EC 3.6.1.15)	Cytoplasmic	0.00258812	0.000996518	0.00436013	0.00191401	0.00280712	0.00525392	0.00349378		0.00589387	0.000100743	4.01529e-05	9.43246e-05	7.69952e-05	0.000110909	0.000203363	0.000137156		0.00023454	1.6634	0.734139	0.307893	2.37029	1.24507	0.238101
P0AEI1	miaB	tRNA-i(6)A37 methylthiotransferase	Cytoplasmic	0.00548767	0.00558068	0.0135068	0.0138305	0.00775587	0.00907087	0.00605562	0.0196518	0.00602693	0.000213609	0.000224864	0.0002922	0.000556362	0.000306435	0.000351106	0.000237726	0.00028527	0.000239834	1.66135	0.732355	0.162493	1.04401	0.0621388	0.733866
P0A7A9	ppa	Inorganic pyrophosphatase (EC 3.6.1.1)	Cytoplasmic	0.0605913	0.0291238	0.0239912	0.0602229	0.0619444	0.0480267	0.0347218	0.112766	0.0120419	0.00235854	0.00117349	0.000519012	0.0024226	0.00244743	0.00185897	0.00136308	0.00163694	0.000479192	1.66105	0.732099	0.233747	0.858843	-0.219534	0.783547
P18843	nadE	NAD synthetase (EC 6.3.1.5)	Inner Membrane	0.00719165	0.00918474	0.0110185	0.0151966	0.0139478	0.00802385	0.0170694	0.0298967	0.00659733	0.000279938	0.000370083	0.000238367	0.000611315	0.000551079	0.000310578	0.000670096	0.000433987	0.000262533	1.65803	0.729469	0.156128	1.53831	0.621346	0.308667
P68688	grxA	Glutaredoxin 1	Cytoplasmic	0.0114643	0.00766755	0.00805622	0.0156984	0.0136391	0.00947559	0.0177453	0.0545761	0.0158629	0.000446251	0.00030895	0.000174284	0.000631505	0.000538881	0.000366771	0.000696632	0.000792239	0.000631243	1.65377	0.725761	0.140359	2.28096	1.18964	0.0189679
P0AFZ3	sspB	Stringent starvation protein B	Inner Membrane	0.00475816	0.00595588	0.00714015	0.0141109	0.00492075	0.0050575	0.00951361		0.00172066	0.000185213	0.000239982	0.000154466	0.000567642	0.000194419	0.00019576	0.000373477		6.84718e-05	1.65238	0.724547	0.417757	1.14364	0.193634	0.885706
P0A877	trpA	Tryptophan synthase alpha chain (EC 4.2.1.20)	Cytoplasmic	0.00336804	0.00255898	0.00713992	0.00247075	0.00638452	0.00747852	0.0062737		0.00324025	0.000131102	0.00010311	0.000154461	9.93914e-05	0.000252253	0.00028947	0.000246288		0.000128942	1.6495	0.722026	0.282521	1.44812	0.53418	0.498037
P39406	rsmC	Ribosomal RNA small subunit methyltransferase C (EC 2.1.1.172) (16S rRNA m2G1207 methyltransferase) (rRNA (guanine-N(2)-)-methyltransferase RsmC)	Inner Membrane	0.00229589	0.00356867	0.00549438	0.00206618	0.00376835	0.00899997				8.93683e-05	0.000143793	0.000118862	8.31165e-05	0.000148888	0.000348361				1.64865	0.721289	0.441733	OFF	OFF
P60546	gmk	Guanylate kinase (EC 2.7.4.8)	Cytoplasmic	0.0046238	0.00108058	0.00390079	0.00170915	0.00681616					0.000179983	4.35399e-05	8.43874e-05	6.87543e-05	0.000269307					1.64688	0.719737	0.627198	OFF	OFF
P0ACJ0	lrp	Leucine-responsive regulatory protein, regulator for leucine (or lrp) regulon and high-affinity branched-chain amino acid transport system	Cytoplasmic	0.0125295	0.0239265	0.0375651	0.0366256	0.0193582	0.0380814	0.0334774	0.0740886	0.0280591	0.000487716	0.000964076	0.000812664	0.00147334	0.000764842	0.00147401	0.00131423	0.00107549	0.00111658	1.63933	0.71311	0.170152	1.5484	0.630782	0.0791508
P0A8I3	yaaA	UPF0246 protein YaaA	Cytoplasmic	0.00224919	0.00155837		0.00346046	0.0036661	0.0021532	0.00201748		0.00279504	8.75505e-05	6.27917e-05		0.000139205	0.000144848	8.33438e-05	7.92006e-05		0.000111225	1.62916	0.704126	0.13528	1.26662	0.340981	0.432031
P0A796	pfkA	6-phosphofructokinase (EC 2.7.1.11)	Inner Membrane	0.011699	0.00773244	0.0176389	0.0194755	0.0178774	0.00981362	0.0241175	0.0322411	0.0121429	0.000455388	0.000311565	0.00038159	0.000783443	0.000706337	0.000379855	0.000946784	0.00046802	0.000483214	1.62783	0.702952	0.183185	1.65254	0.724689	0.249097
P69503	apt	Adenine phosphoribosyltransferase (EC 2.4.2.7)	Cytoplasmic	0.00540857	0.00936373	0.00737651	0.0103328	0.0138333	0.00650902	0.0103264	0.0363356	0.0130905	0.00021053	0.000377295	0.000159579	0.000415658	0.000546556	0.000251944	0.000405386	0.000527456	0.00052092	1.6245	0.699995	0.226235	1.94508	0.95983	0.0485494
P06720	melA	Alpha-galactosidase (EC 3.2.1.22)	Cytoplasmic	0.00243026	0.0029839	0.00725207	0.00228811	0.00830762	0.00472748	0.00499209	0.0122926	0.0079245	9.45987e-05	0.000120231	0.000156887	9.20442e-05	0.000328235	0.000182986	0.000195975	0.000178443	0.000315346	1.62292	0.698588	0.379286	1.85562	0.891899	0.118026
P09394	glpQ	Glycerophosphoryl diester phosphodiesterase, periplasmic (EC 3.1.4.46)	Periplasmic	0.00427568	0.0161814	0.0391531	0.0255994	0.0198723	0.0229245	0.0230326		0.0249843	0.000166432	0.000651999	0.000847016	0.00102979	0.000785158	0.000887338	0.000904195		0.000994221	1.62256	0.698271	0.223737	1.70982	0.773849	0.186415
P77252	ykgE	Predicted L-lactate dehydrogenase, Fe-S oxidoreductase subunit YkgE	Cytoplasmic	0.000758653	0.000738466		0.000693288	0.00156465	0.00140838				2.95308e-05	2.97552e-05		2.78891e-05	6.18195e-05	5.45141e-05				1.62177	0.697572	0.215734
P0C0L2	osmC	Peroxiredoxin OsmC (EC 1.11.1.15) (Osmotically-inducible protein C)	Cytoplasmic	0.00962911	0.00156155	0.00979828	0.00677395	0.0157011	0.00413362	0.00865316		0.00235806	0.000374817	6.29197e-05	0.000211971	0.000272497	0.000620353	0.00016	0.000339699		9.38361e-05	1.6205	0.696439	0.468723	1.00092	0.00132066	0.999076
P0AG20	relA	GTP pyrophosphokinase (EC 2.7.6.5), (p)ppGpp synthetase I	Inner Membrane	0.000415734	0.00179056	0.00301841	0.00226165	0.00248318	0.0015436	0.0025911		0.00182968	1.61826e-05	7.21474e-05	6.52987e-05	9.09797e-05	9.81106e-05	5.97479e-05	0.000101719		7.28098e-05	1.61974	0.695761	0.218764	1.70407	0.768984	0.213755
P0AF03	mog	Molybdopterin adenylyltransferase (MPT adenylyltransferase) (EC 2.7.7.75)	Cytoplasmic		0.00285533	0.00671113	0.00982627	0.00274314	0.003315	0.00957007	0.0213483	0.000846455		0.00011505	0.000145185	0.000395283	0.000108382	0.000128313	0.000375694	0.000309897	3.36837e-05	1.61899	0.695096	0.47674	1.84262	0.881762	0.405444
P27829	wecC	UDP-N-acetyl-D-mannosamine dehydrogenase (EC 1.1.1.336) (UDP-ManNAc 6-dehydrogenase)	Outer Membrane	0.00133144	0.000924145	0.00176937	0.000889204	0.00163379	0.00272088				5.18268e-05	3.72368e-05	3.82776e-05	3.57702e-05	6.45512e-05	0.000105317				1.61486	0.691411	0.324106	OFF	OFF
P52627	fliZ	Flagellar biosynthesis protein FliZ	Cytoplasmic	0.0136285	0.0252261	0.0264273	0.0297162	0.025544	0.0313411	0.0204699		0.0135909	0.000530492	0.00101644	0.000571714	0.0011954	0.00100924	0.00121312	0.000803591		0.000540833	1.61318	0.689907	0.0925573	0.95185	-0.0711933	0.8783
P0A6Y1	ihfB	Integration host factor beta subunit	Cytoplasmic	0.0157425	0.012373	0.0459597	0.0285935	0.0258822	0.030935	0.0164424	0.0102059	0.018325	0.000612783	0.000498546	0.000994266	0.00115024	0.00102261	0.0011974	0.000645483	0.000148151	0.000729222	1.60061	0.678624	0.0937378	0.723242	-0.467449	0.456941
P77774	bamB	Outer membrane protein YfgL, lipoprotein component of the protein assembly complex (forms a complex with YaeT, YfiO, and NlpB)	Outer Membrane	0.00281685	0.00732531	0.0132611	0.00644392	0.0115778	0.0100062	0.00282943		0.00379923	0.000109647	0.00029516	0.000286884	0.000259221	0.000457441	0.00038731	0.000111075		0.000151186	1.59605	0.674503	0.176632	0.568739	-0.814161	0.238217
P76187	ydhF	Oxidoreductase YdhF (EC 1.-.-.-)	Cytoplasmic	0.00163016	0.00298765	0.00628233	0.00854241	0.00175971	0.00242173	0.00606065	0.00444294	0.00226178	6.34546e-05	0.000120382	0.000135909	0.000343637	6.95263e-05	9.37377e-05	0.000237924	6.44947e-05	9.00047e-05	1.58533	0.664782	0.554153	1.2273	0.295488	0.709456
P0AB28	yceD	Uncharacterized protein YceD (G30K)	Cytoplasmic	0.00160318		0.00547481	0.00377761	0.00321458	0.00390174	0.00536264		0.00260513	6.24043e-05		0.000118439	0.000151963	0.000127008	0.000151025	0.000210522		0.000103668	1.58515	0.664617	0.291911	1.73736	0.796897	0.414335
P17117	nfsA	Oxygen-insensitive NADPH nitroreductase (EC 1.-.-.-) (Modulator of drug activity A)	Cytoplasmic	0.00501088	0.00263158	0.00472729	0.00197704	0.00763544	0.00659884	0.00182561		0.00302988	0.00019505	0.000106035	0.000102268	7.95306e-05	0.000301677	0.000255421	7.16681e-05		0.00012057	1.57834	0.658409	0.37705	0.714902	-0.484182	0.398709
P33363	bglX	Periplasmic beta-glucosidase (EC 3.2.1.21)	Periplasmic	0.00246559	0.001352	0.00255506	0.000749045	0.00493808	0.00256421				9.59739e-05	5.44765e-05	5.52747e-05	3.0132e-05	0.000195104	9.92526e-05				1.57729	0.65745	0.499331	OFF	OFF
P0AG55	rplF	LSU ribosomal protein L6p (L9e)	Cytoplasmic	0.14043	0.158614	0.12853	0.209564	0.163978	0.210375	0.211436	0.54552	0.145614	0.00546628	0.00639105	0.00278054	0.00843018	0.0064788	0.00814298	0.00830036	0.0079189	0.00579455	1.57482	0.655183	0.104927	1.50389	0.588702	0.146317
P09372	grpE	Heat shock protein GrpE	Inner Membrane	0.0435498	0.032248	0.0938043	0.0650293	0.067528	0.0673281	0.0651603	0.1979	0.0675225	0.00169519	0.00129937	0.00202931	0.00261595	0.00266803	0.00260606	0.00255801	0.00287275	0.00268698	1.57051	0.651233	0.0444293	1.61583	0.692278	0.0252791
P12008	aroC	Chorismate synthase (EC 4.2.3.5)	Cytoplasmic	0.00272212	0.00248911	0.000727554		0.00259092	0.00333843				0.000105959	0.000100294	1.57395e-05		0.000102368	0.00012922				1.56483	0.646008	0.293197	OFF	OFF
P0A6W5	greA	Transcription elongation factor GreA	Cytoplasmic	0.0127425	0.00733198	0.0180872	0.014402	0.0225567	0.00973812	0.0128391	0.0568403	0.0130611	0.000496008	0.000295429	0.000391288	0.000579352	0.000891215	0.000376933	0.000504027	0.000825106	0.00051975	1.56207	0.643459	0.274353	1.56324	0.644539	0.156446
P35340	ahpF	Alkyl hydroperoxide reductase protein F (EC 1.6.4.-)	Inner Membrane	0.0496172	0.0481287	0.104447	0.0819508	0.0852515	0.0742007	0.0605079	0.209916	0.0811904	0.00193137	0.00193926	0.00225955	0.00329665	0.00336829	0.00287208	0.00237537	0.00304719	0.00323087	1.55575	0.637612	0.00547841	1.41161	0.497345	0.0674299
P69924	nrdB	Ribonucleotide reductase of class Ia (aerobic), beta subunit (EC 1.17.4.1)	Cytoplasmic	0.00250889	0.00334312	0.00658765	0.00234592	0.00858961	0.003851	0.00314925	0.0187765	0.0027213	9.76594e-05	0.000134705	0.000142514	9.437e-05	0.000339376	0.000149061	0.00012363	0.000272563	0.000108291	1.55466	0.636596	0.450225	1.34573	0.428389	0.499905
P07604	tyrR	Transcriptional repressor protein TyrR	Cytoplasmic	0.00115531	0.00135816	0.00302003		0.00336692	0.00096411	0.000979767		0.00402525	4.49707e-05	5.47248e-05	6.53337e-05		0.000133027	3.73177e-05	3.84629e-05		0.00016018	1.54832	0.630699	0.641611	1.80553	0.852419	0.598941
P31460	dgoR	D-Galactonate repressor DgoR	Cytoplasmic	0.000417348	0.00124218		0.00224279	0.000921865	0.000680819				1.62454e-05	5.00512e-05		9.02212e-05	3.6423e-05	2.63524e-05				1.5385	0.621529	0.543989
P17115	gutQ	D-arabinose 5-phosphate isomerase (EC 5.3.1.13)	Cytoplasmic	0.00112542	0.00162683		0.00135796	0.00451399	0.000467311	0.00328633		0.00125481	4.38072e-05	6.55502e-05		5.46269e-05	0.000178348	1.80882e-05	0.000129012		4.99337e-05	1.53053	0.614036	0.613802	1.63634	0.710471	0.536522
P77434	alaC	Glutamate-pyruvate aminotransferase AlaC (EC 2.6.1.2)	Cytoplasmic	0.00187688		0.00264656		0.00331086	0.00176692				7.30581e-05		5.72541e-05		0.000130812	6.83921e-05				1.52867	0.612278	0.462121
P06149	dld	D-Lactate dehydrogenase (EC 1.1.2.5)	Inner Membrane	0.00497059	0.00130465	0.0110633	0.00500262	0.00828699	0.0054764	0.0027703	0.00929647	0.00882351	0.000193482	5.25686e-05	0.000239337	0.000201242	0.000327419	0.000211975	0.000108754	0.00013495	0.000351121	1.52586	0.609626	0.292568	1.22546	0.293327	0.722655
P0A6D7	aroK	Shikimate kinase I (EC 2.7.1.71)	Cytoplasmic	0.00876353	0.00820802	0.00856016	0.0132168	0.0112879	0.00838562	0.0105101	0.0432747	0.0128953	0.000341124	0.000330728	0.000185186	0.000531675	0.000445984	0.000324582	0.000412596	0.000628186	0.000513152	1.51947	0.603567	0.133418	1.81315	0.858496	0.0464363
P0A7L8	rpmA	LSU ribosomal protein L27p	Cytoplasmic	0.0481757	0.0325065	0.0316678	0.0296971	0.0524566	0.0672233	0.058194	0.178047	0.0443195	0.00187525	0.00130979	0.000685084	0.00119463	0.00207256	0.00260201	0.00228453	0.00258457	0.00176364	1.51654	0.600783	0.283097	1.71383	0.777224	0.101022
P0A9S5	gldA	Glycerol dehydrogenase (EC 1.1.1.6)	Cytoplasmic	0.00334809		0.00110482		0.00452919	0.0014161				0.000130326		2.3901e-05		0.000178949	5.48129e-05				1.5157	0.599985	0.675736
P0A7L3	rplT	LSU ribosomal protein L20p	Cytoplasmic	0.0326395	0.037947	0.0589251	0.035957	0.0583159	0.0620237	0.0569517	0.148918	0.0378546	0.0012705	0.00152901	0.00127475	0.00144645	0.00230406	0.00240075	0.00223576	0.00216172	0.00150638	1.50978	0.594343	0.141562	1.44906	0.53512	0.105768
P0A9Q7	adhE	Alcohol dehydrogenase (EC 1.1.1.1)	Inner Membrane	0.0140206	0.011795	0.0311852	0.0229023	0.018896	0.0224347	0.0150507	0.0493006	0.0210611	0.000545759	0.000475259	0.000674643	0.000921296	0.000746584	0.000868379	0.000590849	0.000715659	0.000838102	1.49574	0.580855	0.0234719	1.26476	0.338868	0.182706
P24182	accC	Biotin carboxylase of acetyl-CoA carboxylase (EC 6.3.4.14)	Inner Membrane	0.0171075	0.0202013	0.0439654	0.0370796	0.0220986	0.0327315	0.0428358	0.062238	0.0246695	0.000665915	0.000813976	0.000951123	0.00149161	0.000873117	0.00126694	0.00168161	0.000903461	0.000981692	1.49389	0.579071	0.143976	1.46719	0.553057	0.261965
P0A905	slyB	Outer membrane lipoprotein SlyB	Outer Membrane	0.00168743	0.00188771	0.00654248		0.00282544	0.00439032				6.56839e-05	7.60617e-05	0.000141536		0.000111633	0.000169936				1.49093	0.576211	0.330032	OFF	OFF
P23830	pssA	CDP-diacylglycerol--serine O-phosphatidyltransferase (EC 2.7.8.8)	Inner Membrane	0.00401765	0.00513763	0.00464264	0.00281848	0.00790674	0.00672122	0.00544526		0.00339201	0.000156389	0.000207012	0.000100436	0.00011338	0.000312396	0.000260158	0.000213765		0.000134981	1.47883	0.564451	0.350246	1.12781	0.173524	0.727898
P06959	aceF	Dihydrolipoamide acetyltransferase component of pyruvate dehydrogenase complex (EC 2.3.1.12)	Inner Membrane	0.0413537	0.0695883	0.123142	0.0859321	0.0877322	0.0911059	0.0536862	0.152533	0.0804534	0.00160971	0.00280394	0.00266399	0.00345681	0.0034663	0.00352643	0.00210757	0.0022142	0.00320155	1.47642	0.5621	0.0959726	1.06297	0.088102	0.786674
P38038	cysJ	Sulfite reductase [NADPH] flavoprotein alpha-component (EC 1.8.1.2)	Cytoplasmic	0.00509732	0.00448969	0.00948545	0.00517425	0.00623575	0.0105419	0.0100486	0.0235146	0.00565974	0.000198415	0.000180904	0.000205203	0.000208146	0.000246375	0.000408044	0.000394481	0.000341343	0.000225223	1.47568	0.561376	0.268606	1.64416	0.71735	0.125841
P0A6Y5	hslO	33 kDa chaperonin (Heat shock protein 33) (HSP33)	Inner Membrane	0.0106328	0.0118251	0.0186004	0.0216973	0.0115654	0.0148823	0.015831	0.0135832	0.0102344	0.000413885	0.00047647	0.00040239	0.000872821	0.00045695	0.000576048	0.000621482	0.000197177	0.000407267	1.47424	0.559973	0.237682	0.948312	-0.0765657	0.873661
P0ACK8	fucR	L-fucose operon activator	Cytoplasmic	0.000623519	0.00140356		0.00173038	0.000859441	0.0019396	0.00106634		0.00130238	2.42707e-05	5.65538e-05		6.96084e-05	3.39566e-05	7.50761e-05	4.18616e-05		5.18268e-05	1.47349	0.559236	0.44333	1.15916	0.213077	0.760198
P0A937	bamE	Outer membrane lipoprotein SmpA, a component of the essential YaeT outer-membrane protein assembly complex	Outer Membrane	0.000738998		0.0124744		0.00826119	0.00293376				2.87658e-05		0.000269864		0.0003264	0.000113557				1.47325	0.559003	0.703845
P18196	minC	Septum site-determining protein MinC	Cytoplasmic	0.000553938	0.000369312			0.000706044	0.000665066	0.000544845		0.000405604	2.15623e-05	1.48808e-05			2.78958e-05	2.57427e-05	2.13891e-05		1.61405e-05	1.47185	0.557627	0.211134	1.02982	0.042386	0.910516
P68679	rpsU	SSU ribosomal protein S21p	Cytoplasmic	0.0779226	0.0887719	0.122296	0.135049	0.0786112	0.130371	0.0912225	0.143596	0.105247	0.00303316	0.0035769	0.00264569	0.00543264	0.00310593	0.00504624	0.00358114	0.00208447	0.00418816	1.46772	0.553572	0.173114	1.06461	0.0903242	0.790611
P0ABU0	menB	Naphthoate synthase (EC 4.1.3.36)	Cytoplasmic	0.00779189	0.0112566	0.0212349	0.0225445	0.0111946	0.0112039	0.0119144	0.0392958	0.0096248	0.000303302	0.000453566	0.000459385	0.000906902	0.0004423	0.000433667	0.000467725	0.000570426	0.000383008	1.46587	0.551757	0.351496	1.16847	0.224624	0.411119
P77395	ybbN	Uncharacterized protein YbbN	Cytoplasmic	0.00885596	0.00899035	0.00774901	0.00605054	0.0182887	0.0081334	0.00814374	0.0165363	0.00590866	0.000344721	0.00036225	0.000167638	0.000243396	0.000722589	0.000314819	0.0003197	0.000240044	0.000235128	1.46443	0.55034	0.470576	0.908831	-0.137916	0.723925
P0A9X4	mreB	Rod shape-determining protein MreB	Inner Membrane	0.0195515	0.016498	0.0350195	0.0226303	0.0364367	0.0218743	0.018907	0.0543702	0.017274	0.00076105	0.000664757	0.000757593	0.000910352	0.00143962	0.000846689	0.000742237	0.00078925	0.000687399	1.46407	0.549987	0.211589	1.01625	0.0232586	0.797565
P36938	pgm	Phosphoglucomutase (PGM) (EC 5.4.2.2) (Glucose phosphomutase)	Cytoplasmic	0.0119734	0.0108447	0.0145019	0.0159274	0.0124785	0.0167117	0.0132035	0.0556787	0.00965841	0.00046607	0.000436969	0.000313726	0.000640716	0.000493027	0.000646857	0.000518331	0.000808244	0.000384345	1.46339	0.549312	0.0522754	1.40612	0.491721	0.319003
P0ADZ0	rplW	LSU ribosomal protein L23p (L23Ae)	Cytoplasmic	0.0657077	0.160203		0.176241	0.10269	0.222796	0.192503	0.273136	0.0998594	0.00255769	0.0064551		0.00708967	0.00405731	0.00862373	0.00755714	0.0039649	0.00397379	1.46242	0.548356	0.473246	1.14621	0.196871	0.803406
P13009	metH	5-methyltetrahydrofolate--homocysteine methyltransferase (EC 2.1.1.13)	Inner Membrane	0.000700894	0.00160458	0.00425677	0.00218536	0.00367344	0.000930816	0.00167978		0.00196482	2.72825e-05	6.46536e-05	9.20887e-05	8.79108e-05	0.000145138	3.6029e-05	6.59433e-05		7.81877e-05	1.46218	0.548123	0.491739	1.17482	0.232443	0.633585
Q46868	yqiC	Uncharacterized protein YqiC	Cytoplasmic	0.00452219	0.00509517	0.00539416	0.00737609	0.00201323	0.00907363		0.0107502	0.00378068	0.000176028	0.000205301	0.000116694	0.00029672	7.95428e-05	0.000351212		0.000156052	0.000150447	1.46073	0.546685	0.458573	0.923148	-0.115366	0.673646
P32680	yjaG	Uncharacterized protein YjaG	Cytoplasmic	0.000725763		0.00305045		0.00171596	0.00179535				2.82506e-05		6.59917e-05		6.77976e-05	6.94923e-05				1.45678	0.542779	0.457973
P39099	degQ	Outer membrane stress sensor protease DegQ, serine protease	Periplasmic	0.00465959	0.00131866	0.00482852	0.00286056	0.00561087	0.00405426	0.000828149		0.00189347	0.000181376	5.3133e-05	0.000104458	0.000115072	0.000221686	0.000156928	3.25108e-05		7.53485e-05	1.45644	0.542451	0.349223	0.4773	-1.06703	0.265833
P0ABA6	atpG	ATP synthase gamma chain (EC 3.6.3.14)	Inner Membrane	0.0140482	0.0130084	0.0378528	0.0242612	0.0169903	0.0283866	0.0216648	0.0723949	0.0210634	0.000546833	0.000524148	0.000818887	0.000975961	0.000671289	0.00109876	0.000850499	0.0010509	0.000838194	1.45302	0.539051	0.151928	1.44962	0.535676	0.0789449
P0A780	nusB	Transcription termination protein NusB	Cytoplasmic	0.0030822	0.000762951	0.00360821	0.00311431	0.00353068	0.00172068	0.00394384	0.00795992	0.00327994	0.000119976	3.07417e-05	7.80581e-05	0.00012528	0.000139497	6.66024e-05	0.000154824	0.000115548	0.000130521	1.44849	0.534552	0.373576	1.75234	0.809285	0.142707
P0ABF1	pcnB	Poly(A) polymerase (EC 2.7.7.19)	Inner Membrane	0.000764165	0.00407868	0.00193384	0.0025177	0.0016405	0.00450045	0.00774199		0.00199015	2.97454e-05	0.000164343	4.18356e-05	0.00010128	6.48161e-05	0.000174199	0.000303929		7.91958e-05	1.44239	0.528463	0.554937	2.4359	1.28445	0.489133
P13029	katG	Peroxidase (EC 1.11.1.7)	Cytoplasmic	0.0692757	0.073315	0.164965	0.119184	0.0980159	0.119425	0.110271	0.200398	0.13105	0.00269658	0.0029541	0.00356876	0.00479443	0.00387261	0.00462257	0.00432894	0.00290903	0.00521499	1.44148	0.527549	0.0243704	1.35073	0.433738	0.245214
P0A7A2	gpmB	Phosphoglycerate mutase (EC 5.4.2.1)	Inner Membrane	0.00154838	0.00214822	0.00217982	0.00432269	0.00122013	0.00147065				6.02713e-05	8.65587e-05	4.71571e-05	0.00017389	4.82073e-05	5.69242e-05				1.43835	0.524415	0.561895	OFF	OFF
P61175	rplV	LSU ribosomal protein L22p (L17e)	Cytoplasmic	0.11898	0.100916	0.102667	0.103686	0.133745	0.160873	0.115192	0.319443	0.139321	0.00463136	0.00406623	0.00222104	0.00417101	0.00528428	0.00622689	0.00452212	0.00463711	0.00554412	1.43628	0.522334	0.169132	1.34663	0.429353	0.219063
P24203	yjiA	Putative metal chaperone, involved in Zn homeostasis, GTPase of COG0523 family	Cytoplasmic	0.00205608	0.00094233	0.00322339		0.00273115	0.00181766	0.00332739		0.00173517	8.00336e-05	3.79695e-05	6.9733e-05		0.000107908	7.0356e-05	0.000130624		6.90489e-05	1.42432	0.510272	0.366092	1.59537	0.673895	0.423808
P60422	rplB	LSU ribosomal protein L2p (L8e)	Cytoplasmic	0.10215	0.11105	0.159611	0.143254	0.122642	0.16323	0.129567	0.307586	0.156871	0.00397621	0.00447457	0.00345294	0.00576271	0.00484561	0.00631814	0.00508642	0.00446498	0.00624249	1.42195	0.507867	0.0385672	1.3268	0.407955	0.114191
P06710	dnaX	DNA polymerase III subunits gamma and tau (EC 2.7.7.7)	Cytoplasmic		0.000635327	0.0120052	0.0042692	0.00522008	0.00591521					2.55994e-05	0.000259714	0.000171738	0.000206246	0.00022896				1.41819	0.504052	0.699862
P0AG51	rpmD	LSU ribosomal protein L30p (L7e)	Cytoplasmic	0.0639614	0.0218163	0.0709694	0.0159335	0.102423	0.0585118	0.012747	0.230394	0.0565734	0.00248972	0.000879047	0.00153531	0.000640961	0.00404675	0.00226481	0.000500411	0.00334446	0.00225127	1.4177	0.503553	0.577125	1.24307	0.313913	0.702924
P60785	lepA	Translation elongation factor LepA	Inner Membrane	0.00768145	0.0160078	0.0204717	0.0238052	0.0130512	0.0126614	0.0225624	0.0188473	0.0113216	0.000299003	0.000645005	0.000442874	0.000957615	0.000515655	0.000490084	0.000885736	0.000273591	0.00045053	1.41566	0.501475	0.358842	1.16077	0.215087	0.743374
P0A7G2	rbfA	Ribosome-binding factor A	Inner Membrane	0.00857571	0.00644333	0.0165332	0.0131052	0.0102099	0.0107158	0.0171322	0.0427922	0.0087575	0.000333813	0.000259622	0.000357669	0.000527186	0.000403393	0.000414777	0.000672563	0.000621182	0.000348494	1.41452	0.500313	0.060836	1.72667	0.787989	0.140185
P0AA16	ompR	Transcriptional regulatory protein OmpR	Cytoplasmic	0.0112648	0.00544945	0.0526638	0.0193008	0.014654	0.0305022	0.0403359	0.0119381	0.00976324	0.000438485	0.000219576	0.0011393	0.000776416	0.00057898	0.00118065	0.00158347	0.000173296	0.000388516	1.41098	0.496701	0.502756	1.19358	0.255291	0.836007
P0C037	yaiE	UPF0345 protein YaiE	Cytoplasmic	0.0160349	0.00782001		0.0251882	0.0162717	0.00846386	0.0193633	0.0426326	0.0101997	0.000624163	0.000315093		0.00101325	0.000642896	0.00032761	0.000760148	0.000618864	0.000405886	1.40803	0.493683	0.501641	1.26689	0.341288	0.572507
P0A9F3	cysB	Cys regulon transcriptional activator CysB	Cytoplasmic	0.0013794	0.00413148	0.00421481	0.00403698	0.00378349	0.00319953	0.00307347		0.00382046	5.36936e-05	0.00016647	9.11809e-05	0.000162397	0.000149486	0.000123844	0.000120656		0.000152031	1.3995	0.484909	0.33839	1.31375	0.39369	0.446114
P10408	secA	Protein translocase subunit SecA	Inner Membrane	0.010449	0.0161734	0.0248115	0.0124818	0.0267226	0.0171895	0.00733198	0.0236498	0.0191578	0.000406733	0.000651679	0.000536759	0.000502108	0.00105581	0.000665352	0.000287833	0.000343306	0.000762363	1.39375	0.478973	0.334116	0.873575	-0.194997	0.713425
P0A6J5	dadA	D-amino acid dehydrogenase small subunit (EC 1.4.99.1)	Inner Membrane	0.0307411	0.0355673	0.0579044	0.0473828	0.0509312	0.0380212	0.0264676	0.0471943	0.0217169	0.00119661	0.00143312	0.00125267	0.00190608	0.0020123	0.00147169	0.00103904	0.000685083	0.000864197	1.38833	0.473353	0.0764906	0.666682	-0.58493	0.0308331
P27298	prlC	Oligopeptidase A (EC 3.4.24.70)	Inner Membrane	0.00970668	0.00429214	0.0153754	0.00828751	0.0142497	0.00849179	0.00591475	0.0310457	0.0105889	0.000377836	0.000172944	0.000332623	0.000333383	0.000563008	0.000328691	0.000232196	0.000450667	0.000421371	1.38678	0.471734	0.317705	1.24998	0.321901	0.470946
P0A7R5	rpsJ	SSU ribosomal protein S10p (S20e)	Cytoplasmic	0.109758	0.118238	0.210916	0.224121	0.123249	0.127951	0.120351	0.263449	0.177452	0.00427235	0.00476419	0.00456284	0.00901576	0.00486956	0.00495259	0.00472464	0.00382428	0.00706149	1.3852	0.470098	0.329777	1.14788	0.198968	0.56023
P0A8W8	yfbU	UPF0304 protein YfbU	Cytoplasmic	0.00720794	0.00813713	0.0144105	0.00888021	0.0134955	0.00992272	0.0089834	0.0269059	0.00476672	0.000280572	0.000327871	0.000311749	0.000357226	0.000533208	0.000384078	0.000352663	0.000390573	0.000189686	1.38505	0.469939	0.156943	1.01383	0.0198218	0.952049
P77399	fadJ	3-hydroxybutyryl-CoA epimerase (EC 5.1.2.3)	Inner Membrane	0.00227668	0.00131262	0.00668817	0.0015998	0.00354886	0.00494327	0.00296522		0.0011743	8.86204e-05	5.28898e-05	0.000144688	6.43556e-05	0.000140216	0.000191339	0.000116406		4.673e-05	1.38334	0.468158	0.471083	0.855017	-0.225976	0.780698
P0A8C4	ygfB	UPF0149 protein YgfB	Cytoplasmic	0.00386962	0.00353971		0.00969537	0.00303417	0.00253614				0.000150626	0.000142626		0.000390018	0.00011988	9.8166e-05				1.38234	0.467117	0.611088
P23721	serC	Phosphoserine aminotransferase (EC 2.6.1.52)	Cytoplasmic	0.00932829	0.00296576	0.0116575	0.00608474	0.0139569	0.00557516	0.0070663	0.024123	0.00391728	0.000363107	0.0001195	0.000252191	0.000244772	0.000551438	0.000215797	0.000277403	0.000350174	0.000155884	1.37726	0.461798	0.517448	1.06623	0.092512	0.866684
P0AEZ3	minD	Septum site-determining protein MinD	Inner Membrane	0.0113367	0.0285122	0.0276599	0.0264195	0.0327243	0.0169219	0.0289131	0.0453422	0.014591	0.000441286	0.00114885	0.00059838	0.00106278	0.00129294	0.000654993	0.00113505	0.000658198	0.000580633	1.37569	0.460155	0.390568	1.0847	0.117295	0.834164
P76268	kdgR	Transcriptional regulator KdgR, KDG operon repressor	Cytoplasmic	0.00712738	0.00441041	0.00884091	0.0091432	0.00822888	0.00501203	0.00565747	0.0105572	0.00428075	0.000277436	0.00017771	0.000191259	0.000367806	0.000325124	0.000194	0.000222096	0.00015325	0.000170347	1.3721	0.456381	0.272843	0.844198	-0.244346	0.427978
P0A6Z1	hscA	Chaperone protein HscA	Cytoplasmic	0.00587425	0.00788006	0.045926	0.00447975	0.0366711	0.0123112	0.0189702	0.019158	0.0213985	0.000228657	0.000317513	0.000993538	0.000180208	0.00144888	0.000476528	0.000744717	0.000278102	0.000851528	1.36754	0.451583	0.702175	1.21734	0.283731	0.729598
P52612	fliI	Flagellum-specific ATP synthase FliI	Cytoplasmic	0.00148802	0.00092878	0.00670583	0.00199675	0.00300039	0.0033507	0.00189997		0.00335358	5.79215e-05	3.74235e-05	0.00014507	8.03237e-05	0.000118545	0.000129695	7.45874e-05		0.000133452	1.36665	0.450649	0.480808	1.298	0.376289	0.628532
P00934	thrC	Threonine synthase (EC 4.2.3.1)	Cytoplasmic	0.00821549	0.00564178	0.00554319	0.00777097	0.010065	0.00513298	0.0070445	0.00815745	0.00475752	0.000319791	0.000227325	0.000119918	0.000312604	0.00039767	0.000198682	0.000276547	0.000118415	0.00018932	1.36268	0.446449	0.378964	0.87594	-0.191096	0.728017
P0A6J8	ddlA	D-alanine--D-alanine ligase (EC 6.3.2.4)	Cytoplasmic	0.00618102	0.00283188	0.0274481	0.0248248	0.00493523	0.00254445	0.00703134	0.0140111	0.00241917	0.000240598	0.000114106	0.000593797	0.000998634	0.000194991	9.84878e-05	0.000276031	0.000203388	9.62679e-05	1.36227	0.446011	0.744005	0.606943	-0.720367	0.485596
P02413	rplO	LSU ribosomal protein L15p (L27Ae)	Cytoplasmic	0.183849	0.234845	0.222835	0.23952	0.24931	0.250609	0.249686	1.02206	0.172059	0.00715637	0.00946266	0.00482069	0.00963522	0.00985026	0.00970029	0.00980197	0.0148365	0.00684689	1.36129	0.444979	0.193581	1.46855	0.554395	0.296774
P30178	ybiC	Malate dehydrogenase (EC 1.1.1.37)	Cytoplasmic	0.00416582	0.000604159	0.00108778	0.000949475	0.0047444	0.00155545				0.000162156	2.43435e-05	2.35324e-05	3.81947e-05	0.000187452	6.02067e-05				1.361	0.444665	0.719142	OFF	OFF
P69811	fruB	PTS system, fructose-specific IIA component	Inner Membrane	0.00883773	0.00666472	0.0147368	0.00953429	0.0113718	0.0112189	0.0106468		0.0067977	0.000344012	0.000268543	0.000318808	0.000383538	0.000449301	0.00043425	0.000417962		0.000270506	1.36047	0.444104	0.0202695	1.10881	0.149011	0.727423
P0C018	rplR	LSU ribosomal protein L18p (L5e)	Cytoplasmic	0.204876	0.231692	0.326301	0.304077	0.227259	0.307784	0.28678	0.858463	0.248747	0.00797487	0.00933562	0.00705902	0.0122322	0.00897903	0.0119134	0.0112582	0.0124616	0.00989858	1.35926	0.442825	0.087836	1.37953	0.464173	0.0366436
P0AG44	rplQ	LSU ribosomal protein L17p	Cytoplasmic	0.119188	0.155026	0.157385	0.156409	0.146528	0.188442	0.182274	0.562689	0.121892	0.00463943	0.00624649	0.00340478	0.00629188	0.00578933	0.00729402	0.00715557	0.00816812	0.00485053	1.35579	0.439137	0.165216	1.4117	0.497437	0.202599
P0AG59	rpsN	SSU ribosomal protein S14p (S29e)	Cytoplasmic	0.0341037	0.023484	0.0409175	0.0370648	0.0276878	0.0436484	0.0413007	0.0368027	0.0283385	0.0013275	0.000946245	0.000885187	0.00149101	0.00109395	0.0016895	0.00162135	0.000534236	0.0011277	1.35313	0.436304	0.174793	1.03936	0.0557023	0.912198
P0A7X6	rimM	16S rRNA processing protein RimM	Inner Membrane	0.0105899	0.0133588	0.0220004	0.0114131	0.0179659	0.0196257	0.0174947	0.0184389	0.0141795	0.000412217	0.000538269	0.000475945	0.000459119	0.000709835	0.000759651	0.000686793	0.000267663	0.000564255	1.35205	0.435147	0.206146	1.06469	0.0904371	0.831634
P76536	yfeX	Probable deferrochelatase/peroxidase YfeX (EC 1.11.1.-)	Cytoplasmic	0.00690863	0.00377696	0.00820736	0.00381056	0.0117188	0.00497476	0.00760003	0.0108483	0.00464153	0.000268921	0.000152186	0.000177554	0.000153288	0.00046301	0.000192558	0.000298356	0.000157476	0.000184704	1.35111	0.434145	0.555667	1.06995	0.0975414	0.815358
P60340	truB	tRNA pseudouridine synthase B (EC 4.2.1.70)	Cytoplasmic	0.00211175	0.000822858	0.00262207		0.00223748	0.00170451	0.00236053		0.0011451	8.22007e-05	3.31556e-05	5.67244e-05		8.8403e-05	6.59763e-05	9.26676e-05		4.55677e-05	1.3457	0.428356	0.353401	1.20497	0.269003	0.715803
P0A9C3	galM	Aldose 1-epimerase (EC 5.1.3.3)	Cytoplasmic	0.00289721	0.00315326	0.00282684	0.00348427	0.00396537	0.00278978	0.00211523	0.00311668	0.00192087	0.000112775	0.000127055	6.11544e-05	0.000140162	0.000156672	0.000107984	8.30378e-05	4.52424e-05	7.64389e-05	1.34498	0.427586	0.239189	0.680165	-0.556043	0.254218
P09030	xthA	Exodeoxyribonuclease III (EC 3.1.11.2)	Cytoplasmic	0.00400837	0.00237675	0.00485155	0.0039782	0.00397452	0.00420009	0.00246144		0.00454542	0.000156027	9.57671e-05	0.000104956	0.000160032	0.000157034	0.000162573	9.66292e-05		0.00018088	1.34447	0.427033	0.159527	1.16682	0.222582	0.723649
P0A8G3	uxaC	Uronate isomerase (EC 5.3.1.12)	Cytoplasmic	0.0192246	0.013724	0.0389442	0.0249305	0.0289174	0.0189559	0.0154587	0.0627203	0.0178577	0.000748323	0.000552985	0.000842497	0.00100289	0.00114253	0.000733725	0.000606864	0.000910463	0.000710626	1.343	0.425464	0.178825	1.03925	0.0555449	0.831239
P0A9C9	glpX	Fructose-1,6-bisphosphatase, GlpX type (EC 3.1.3.11)	Cytoplasmic	0.00130058	0.00210181	0.00290628	0.00354882	0.00153053	0.00162468	0.00206377		0.00118513	5.06257e-05	8.46885e-05	6.28728e-05	0.000142759	6.04713e-05	6.28862e-05	8.10178e-05		4.71608e-05	1.34276	0.425196	0.49878	0.970134	-0.0437444	0.930495
P0ABZ1	fliG	Flagellar motor switch protein FliG	Inner Membrane	0.00884995	0.00606042	0.00446369	0.00908378	0.00407339	0.0101616	0.00188842	0.0282329	0.00428184	0.000344488	0.000244194	9.65651e-05	0.000365415	0.00016094	0.000393325	7.41338e-05	0.000409835	0.000170391	1.34212	0.424509	0.489177	0.954926	-0.066539	0.937725
P0A6W9	gshA	Glutamate--cysteine ligase (EC 6.3.2.2)	Cytoplasmic	0.00637104	0.00336885	0.00601984	0.00660493	0.00403232	0.00683906	0.00534401	0.010233	0.00182994	0.000247995	0.000135742	0.00013023	0.000265698	0.000159317	0.000264719	0.000209791	0.000148544	7.28202e-05	1.34198	0.424368	0.324391	0.838878	-0.253468	0.643014
P0A8M0	asnS	Asparaginyl-tRNA synthetase (EC 6.1.1.22)	Inner Membrane	0.0152774	0.0325648	0.038088	0.0282375	0.0388508	0.0255696	0.0337495	0.0577545	0.0258988	0.00059468	0.00131214	0.000823975	0.00113592	0.001535	0.00098972	0.00132491	0.000838378	0.00103061	1.3405	0.422771	0.314206	1.16959	0.225997	0.581363
P0A9W3	ettA	Energy-dependent translational throttle protein EttA (Translational regulatory factor EttA)	Inner Membrane	0.00952673	0.0128422	0.0137184	0.0123376	0.0193285	0.00841373	0.0329039	0.0255443	0.0210036	0.000370831	0.000517454	0.000296777	0.000496309	0.000763672	0.00032567	0.00129171	0.000370806	0.000835815	1.33803	0.420112	0.419956	2.10819	1.076	0.237635
P0A9A6	ftsZ	Cell division protein FtsZ (EC 3.4.24.-)	Inner Membrane	0.0243292	0.0251736	0.0448072	0.0381468	0.0308916	0.0297042	0.0404304	0.083989	0.0157164	0.000947023	0.00101432	0.000969334	0.00153454	0.00122053	0.00114976	0.00158718	0.0012192	0.000625414	1.3324	0.414023	0.10716	1.17099	0.227729	0.611835
P0A759	nagB	Glucosamine-6-phosphate deaminase (EC 3.5.99.6)	Inner Membrane	0.00940388	0.0123177	0.019685	0.019565	0.0127842	0.0108559	0.0176944		0.015564	0.000366049	0.000496318	0.000425855	0.000787044	0.000505105	0.000420199	0.000694633		0.000619351	1.32923	0.410595	0.330665	1.53	0.613528	0.0296633
P0A6Y8	dnaK	Chaperone protein DnaK	Inner Membrane	0.144636	0.130397	0.307899	0.189676	0.213709	0.187102	0.217557	0.567849	0.24369	0.00563002	0.00525409	0.00666092	0.00763012	0.00844366	0.00724215	0.00854066	0.00824303	0.00969737	1.32892	0.410253	0.0260972	1.50932	0.593898	0.00825982
P63020	nfuA	Fe/S biogenesis protein NfuA	Cytoplasmic	0.0237149	0.0203794	0.0411952	0.0238352	0.0424017	0.0221349	0.0246749	0.061817	0.0274521	0.000923112	0.000821151	0.000891194	0.000958825	0.00167529	0.000856773	0.000968666	0.000897349	0.00109243	1.32459	0.405542	0.383511	1.12255	0.166784	0.192361
P0AAT9	ybeL	Uncharacterized protein YbeL	Cytoplasmic	0.00262648	0.000695474		0.00199286	0.00184047	0.00273629	0.00277254		0.00165471	0.000102237	2.80229e-05		8.01672e-05	7.27171e-05	0.000105914	0.000108842		6.5847e-05	1.32452	0.405473	0.670097	1.34108	0.423399	0.666909
P36767	rdgC	DNA recombination-dependent growth factor C	Cytoplasmic	0.00479586	0.00735475	0.0125058	0.00928379	0.00407343	0.0119772	0.010174	0.0121771	0.00712549	0.000186681	0.000296346	0.000270544	0.000373461	0.000160942	0.000463599	0.000399403	0.000176766	0.00028355	1.32436	0.405298	0.467111	1.14086	0.190122	0.658254
P32157	yiiM	Protein YiiM	Cytoplasmic	0.000688188		0.00157395	0.00179849	0.000817346	0.000417839				2.6788e-05		3.40501e-05	7.23482e-05	3.22934e-05	1.61733e-05				1.3239	0.40479	0.618156
Q46829	bglA	6-phospho-beta-glucosidase (EC 3.2.1.86)	Cytoplasmic	0.00451332	0.00448222	0.00714395	0.00512526	0.00488168	0.00716229	0.00532635	0.00645612	0.00747697	0.000175683	0.000180603	0.000154548	0.000206175	0.000192876	0.00027723	0.000209098	9.37185e-05	0.000297537	1.32388	0.404768	0.161306	1.17524	0.232957	0.664453
P0AEZ9	moaB	Molybdenum cofactor biosynthesis protein MoaB	Inner Membrane	0.0124808	0.0115327	0.0105894	0.0143907	0.0102581	0.0149143	0.0116342	0.0222145	0.00556403	0.000485821	0.000464691	0.000229086	0.000578899	0.000405298	0.000577287	0.000456725	0.00032247	0.000221414	1.32374	0.404624	0.281174	0.848263	-0.237416	0.607315
P0ADA5	yajG	Uncharacterized lipoprotein YajG	Outer Membrane		0.00194449	0.00533843	0.00475983	0.00232608	0.00260869					7.83498e-05	0.000115489	0.000191475	9.19037e-05	0.000100974				1.3219	0.402615	0.460568
P37765	rluB	Ribosomal large subunit pseudouridine synthase B (EC 5.4.99.22) (23S rRNA pseudouridine(2605) synthase) (rRNA pseudouridylate synthase B) (rRNA-uridine isomerase B)	Inner Membrane	0.00968856	0.00414029	0.0167383	0.0118604	0.0126703	0.00562122	0.00433165	0.0234476	0.00686397	0.000377131	0.000166826	0.000362107	0.00047711	0.000500604	0.00021758	0.000170048	0.000340371	0.000273143	1.31922	0.399681	0.445917	0.864799	-0.209563	0.654197
P69222	infA	Translation initiation factor 1	Cytoplasmic	0.0130442	0.0140757	0.0185731		0.0149457	0.01828	0.0175312	0.021096	0.00768796	0.00050775	0.000567155	0.0004018		0.000590506	0.000707561	0.000688226	0.000306234	0.000305933	1.31854	0.398945	0.158207	0.880604	-0.183435	0.699851
P0AC47	frdB	Succinate dehydrogenase iron-sulfur protein (EC 1.3.99.1)	Inner Membrane	0.00140504	0.0037044	0.00715318	0.00423762	0.00122061	0.0065139	0.00149419		0.00180446	5.46919e-05	0.000149262	0.000154748	0.000170468	4.82262e-05	0.000252133	5.86575e-05		7.18064e-05	1.31259	0.392411	0.617531	0.545566	-0.874173	0.233504
P0A7Q1	rpmI	LSU ribosomal protein L35p	Cytoplasmic	0.0267262	0.00558686		0.0145462	0.0206393	0.0280758	0.0205948	0.0222703	0.0187283	0.00104033	0.000225113		0.000585151	0.000815462	0.00108673	0.000808495	0.000323281	0.000745269	1.3104	0.390003	0.715695	0.988877	-0.0161368	0.989235
P0AAC0	uspE	Universal stress protein E	Cytoplasmic	0.00502974	0.00421849	0.00939166	0.000848324	0.0157716	0.00227007	0.00150052		0.00536629	0.000195784	0.000169976	0.000203174	3.41257e-05	0.000623137	8.78675e-05	5.8906e-05		0.000213545	1.30969	0.38923	0.784466	0.718319	-0.477304	0.614526
P0AEM6	fliA	RNA polymerase sigma factor for flagellar operon	Cytoplasmic	0.00180046	0.00266517	0.00180714	0.0017189	0.00296555	0.00248726	0.00365367	0.00657315	0.00220453	7.00835e-05	0.000107388	3.90946e-05	6.91464e-05	0.000117169	9.62743e-05	0.000143433	9.54174e-05	8.77267e-05	1.30487	0.383901	0.41904	1.50798	0.592613	0.237235
P0A800	rpoZ	DNA-directed RNA polymerase omega subunit (EC 2.7.7.6)	Inner Membrane	0.0125544	0.0211539	0.0205137	0.0265356	0.00926945	0.0230331	0.0462852	0.0451998	0.00408545	0.000488684	0.00085236	0.000443781	0.00106745	0.000366236	0.000891539	0.00181703	0.00065613	0.000162576	1.30278	0.381589	0.514185	1.47674	0.56242	0.62614
P24251	crl	Sigma factor-binding protein Crl (Curlin genes transcriptional activatory protein)	Cytoplasmic	0.00682248	0.0176092	0.013086		0.0256238	0.00198591	0.00737988	0.174202	0.0675772	0.000265567	0.00070953	0.000283096		0.0010124	7.68684e-05	0.000289713	0.00252876	0.00268915	1.29861	0.376968	0.835077	4.3774	2.13008	0.20572
P77804	ydgA	Protein YdgA	Inner Membrane	0.00241174	0.00734455	0.0108735	0.00974488	0.00327603	0.00749751	0.00319444		0.00429624	9.38778e-05	0.000295936	0.000235232	0.000392009	0.000129436	0.000290205	0.000125405		0.000170964	1.29855	0.376899	0.558452	0.711233	-0.491605	0.428694
P0AG48	rplU	LSU ribosomal protein L21p	Cytoplasmic	0.159197	0.146237	0.192309	0.195261	0.159377	0.178595	0.144982	0.4398	0.131791	0.00619678	0.00589237	0.00416032	0.00785481	0.006297	0.00691285	0.00569159	0.00638424	0.00524448	1.29633	0.374432	0.115846	1.0659	0.0920723	0.652032
P16456	selD	Selenide,water dikinase (EC 2.7.9.3)	Cytoplasmic	0.00677619	0.0066853	0.0217329	0.0100033	0.0170158	0.00582144	0.00675235	0.0248652	0.0100072	0.000263766	0.000269372	0.000470158	0.000402406	0.000672293	0.00022533	0.000265078	0.000360948	0.000398225	1.29576	0.373797	0.548007	1.02089	0.0298229	0.934438
P0ADY3	rplN	LSU ribosomal protein L14p (L23e)	Cytoplasmic	0.15508	0.139243	0.161886	0.120803	0.184229	0.193435	0.150282	0.401429	0.191195	0.00603654	0.00561054	0.00350215	0.00485959	0.00727892	0.00748727	0.00589964	0.00582723	0.00760836	1.2955	0.373504	0.264956	1.27632	0.351987	0.231694
P0ABB0	atpA	ATP synthase alpha chain (EC 3.6.3.14)	Inner Membrane	0.082718	0.115501	0.1868	0.160217	0.0814399	0.148917	0.124157	0.382386	0.124567	0.00321983	0.00465389	0.00404114	0.00644507	0.0032177	0.00576411	0.00487407	0.0055508	0.00495701	1.29476	0.372685	0.360653	1.29098	0.36847	0.0900958
P61714	ribE	6,7-dimethyl-8-ribityllumazine synthase (EC 2.5.1.78)	Inner Membrane	0.0193211	0.0127767	0.0307578	0.0215235	0.0289695	0.0126121	0.0327935	0.0141351	0.03543	0.00075208	0.000514813	0.000665398	0.000865831	0.00114459	0.000488177	0.00128738	0.000205188	0.00140989	1.29307	0.370805	0.431485	1.50208	0.586964	0.488558
P05055	pnp	Polyribonucleotide nucleotidyltransferase (EC 2.7.7.8)	Inner Membrane	0.0695043	0.0813972	0.152448	0.099511	0.0926881	0.111938	0.0789567	0.172376	0.0453888	0.00270548	0.00327975	0.00329797	0.00400305	0.00366211	0.00433276	0.00309962	0.00250225	0.00180619	1.29243	0.37009	0.030017	0.798007	-0.325527	0.234306
P0A6Q3	fabA	3-hydroxydecanoyl-[acyl-carrier-protein] dehydratase (EC 4.2.1.59) (3-hydroxyacyl-[acyl-carrier-protein] dehydratase FabA) (Beta-hydroxydecanoyl thioester dehydrase) (Trans-2-decenoyl-[acyl-carrier-protein] isomerase) (EC 5.3.3.14)	Cytoplasmic	0.0623426	0.0369597	0.063769	0.061269	0.0609279	0.0506952	0.0597524	0.195501	0.0353837	0.00242671	0.00148922	0.00137954	0.00246468	0.00240726	0.00196226	0.00234571	0.00283794	0.00140805	1.29057	0.368013	0.261863	1.24478	0.315891	0.466867
P0A8T7	rpoC	DNA-directed RNA polymerase beta' subunit (EC 2.7.7.6)	Inner Membrane	0.0732656	0.0673259	0.153623	0.0914111	0.0902536	0.108197	0.081912	0.292413	0.0666814	0.00285189	0.00271278	0.0033234	0.00367722	0.00356592	0.00418798	0.00321563	0.00424473	0.00265351	1.28612	0.363024	0.033425	1.13792	0.186394	0.482565
P06715	gor	Glutathione reductase (EC 1.8.1.7)	Cytoplasmic	0.00903313	0.00902391	0.0198353	0.0159732	0.00980533	0.0113508	0.0148734		0.00607528	0.000351618	0.000363602	0.000429105	0.000642558	0.000387409	0.000439353	0.000583889		0.000241758	1.28401	0.360651	0.296813	1.08227	0.114064	0.884721
P31663	panC	Pantoate--beta-alanine ligase (EC 6.3.2.1)	Cytoplasmic	0.0019365	0.00293357	0.0024926	0.00274082	0.00283142	0.00246845	0.00253817		0.00621458	7.53788e-05	0.000118203	5.39234e-05	0.000110255	0.000111869	9.55462e-05	9.96414e-05		0.000247302	1.28349	0.360075	0.341152	2.10264	1.0722	0.425505
P0A850	tig	Trigger factor (TF) (EC 5.2.1.8) (PPIase)	Inner Membrane	0.159596	0.155219	0.172159	0.208909	0.153568	0.161686	0.174061	0.561564	0.168738	0.00621235	0.00625426	0.00372439	0.00840383	0.00606747	0.00625838	0.00683313	0.00815179	0.00671471	1.28032	0.356506	0.249883	1.34023	0.422478	0.146898
P00946	manA	Mannose-6-phosphate isomerase (EC 5.3.1.8)	Cytoplasmic	0.0128474	0.00685669	0.015433	0.0120208	0.0145414	0.00938405	0.0122368	0.0397165	0.00532873	0.000500091	0.000276278	0.000333869	0.000483563	0.000574533	0.000363228	0.000480384	0.000576534	0.000212051	1.2802	0.356366	0.317722	1.14297	0.192787	0.704685
P0A8N3	lysS	Lysine--tRNA ligase (EC 6.1.1.6) (Lysyl-tRNA synthetase) (LysRS)	Cytoplasmic	0.0236651	0.0343454	0.0743757	0.0570936	0.0375891	0.0312775	0.0493195	0.0940676	0.0321869	0.000921172	0.00138389	0.001609	0.00229671	0.00148515	0.00121065	0.00193614	0.00136551	0.00128084	1.27553	0.3511	0.41154	1.17078	0.227464	0.483308
P02359	rpsG	SSU ribosomal protein S7p (S5e)	Cytoplasmic	0.146646	0.180136	0.275269	0.227489	0.157833	0.225752	0.17238	0.428315	0.148191	0.00570823	0.00725824	0.00595501	0.00915127	0.006236	0.00873818	0.00676715	0.00621752	0.00589709	1.27503	0.35053	0.18967	0.9979	-0.00303261	0.982084
P0A7N9	rpmG	LSU ribosomal protein L33p	Cytoplasmic	0.0255308	0.0155027	0.0202028	0.0220017	0.013142	0.0314084	0.0271349	0.0759325	0.0273627	0.000993794	0.000624655	0.000437057	0.000885069	0.000519241	0.00121572	0.00106524	0.00110225	0.00108887	1.27464	0.350092	0.509672	1.58421	0.663766	0.133531
P0A6G7	clpP	ATP-dependent Clp protease proteolytic subunit (EC 3.4.21.92)	Cytoplasmic	0.032317	0.0171472	0.0638123	0.0425136	0.0361128	0.0285915	0.0160402	0.0973568	0.0318913	0.00125795	0.000690916	0.00138048	0.0017102	0.00142682	0.00110669	0.000629694	0.00141325	0.00126908	1.27464	0.350086	0.33172	0.994797	-0.00752606	0.986525
P23836	phoP	Transcriptional regulatory protein PhoP	Cytoplasmic	0.00390331	0.00384536	0.007086	0.0042068	0.00858093	0.00201975	0.0121703		0.00313743	0.000151938	0.000154942	0.000153295	0.000169228	0.000339033	7.81785e-05	0.000477771		0.00012485	1.27439	0.349802	0.637189	1.96433	0.974034	0.555869
P46853	yhhX	Uncharacterized oxidoreductase YhhX (EC 1.-.-.-)	Cytoplasmic	0.00761388	0.00874841	0.0145156	0.00646275	0.0107616	0.0139682	0.00951606	0.0195494	0.00970636	0.000296373	0.000352501	0.000314023	0.000259979	0.000425193	0.000540668	0.000373574	0.000283784	0.000386253	1.27307	0.348316	0.394962	1.08382	0.116129	0.512115
P0A6E4	argG	Argininosuccinate synthase (EC 6.3.4.5)	Inner Membrane	0.000908704	0.000983826	0.0010309	0.000834662	0.000954455	0.00135749				3.53716e-05	3.96415e-05	2.2302e-05	3.35761e-05	3.77106e-05	5.25441e-05				1.27247	0.347636	0.319387	OFF	OFF
P25894	loiP	Metalloprotease LoiP (EC 3.4.24.-)	Outer Membrane	0.00246609	0.00632408	0.00890562	0.00642134	0.00501545	0.00603395	0.00833048	0.00287088	0.00104813	9.59936e-05	0.000254817	0.000192659	0.000258313	0.000198161	0.000233556	0.000327031	4.16743e-05	4.1709e-05	1.26967	0.344456	0.406722	0.755174	-0.40512	0.704079
P40874	solA	N-methyl-L-tryptophan oxidase (MTOX) (EC 1.5.3.-)	Inner Membrane	0.00154478	0.00135808	0.00301964	0.00134203	0.00191112	0.00256156	0.00133659		0.000652962	6.01312e-05	5.47215e-05	6.53253e-05	5.39861e-05	7.55084e-05	9.915e-05	5.24706e-05		2.59838e-05	1.26899	0.343683	0.340624	0.653141	-0.614534	0.350371
P0A7Y0	rnc	Ribonuclease III (EC 3.1.26.3)	Cytoplasmic	0.00128006	0.00279348	0.00517774	0.00283217	0.00367921	0.00229096	0.00462807	0.00414561	0.00362131	4.98266e-05	0.000112558	0.000112012	0.000113931	0.000145366	8.86762e-05	0.000181685	6.01786e-05	0.000144106	1.26813	0.342706	0.409803	1.40661	0.492218	0.43244
P0ADQ2	yiiD	Uncharacterized protein YiiD	Inner Membrane	0.000971396	0.00119743	0.00442819		0.00174116	0.0021941	0.000684255		0.00169299	3.78119e-05	4.82483e-05	9.57969e-05		6.87933e-05	8.49268e-05	2.68619e-05		6.73704e-05	1.26792	0.342462	0.474356	0.77725	-0.363549	0.658708
P0A8E1	ycfP	UPF0227 protein YcfP	Cytoplasmic	0.00455477	0.00476622	0.0073141	0.00887406	0.00566411	0.00226023	0.0067132	0.00641182	0.00407371	0.000177296	0.000192046	0.000158229	0.000356979	0.000223789	8.74867e-05	0.000263541	9.30754e-05	0.000162108	1.26666	0.341031	0.608866	0.983231	-0.0243975	0.95837
P39286	rsgA	Ribosome small subunit-stimulated GTPase EngC	Inner Membrane	0.0013756	0.00220453	0.00235711	0.00175594	0.00259699	0.00184028				5.35459e-05	8.88278e-05	5.09925e-05	7.06367e-05	0.000102607	7.12316e-05				1.26431	0.338355	0.351893	OFF	OFF
P00960	glyQ	Glycine--tRNA ligase alpha subunit (EC 6.1.1.14) (Glycyl-tRNA synthetase alpha subunit) (GlyRS)	Inner Membrane	0.0138968	0.0161636	0.0256833	0.0109862	0.0315782	0.0133799	0.022358	0.0260685	0.0202714	0.000540939	0.000651283	0.000555618	0.000441945	0.00124766	0.000517895	0.00087771	0.000378417	0.000806676	1.26299	0.336839	0.612461	1.1802	0.239033	0.573207
P0A7J0	ribB	3,4-dihydroxy-2-butanone 4-phosphate synthase (EC 4.1.99.12)	Inner Membrane	0.0405176	0.0181524	0.0398389	0.0249211	0.0429565	0.0334622	0.0306344	0.158867	0.0281643	0.00157716	0.000731417	0.000861853	0.00100251	0.00169721	0.00129522	0.00120262	0.00230616	0.00112077	1.26006	0.333496	0.456173	1.46022	0.54619	0.360565
P0A7V8	rpsD	SSU ribosomal protein S4p (S9e)	Cytoplasmic	0.155726	0.162464	0.257547	0.191571	0.203093	0.185344	0.186944	0.413598	0.137074	0.00606171	0.00654619	0.00557162	0.00770636	0.0080242	0.0071741	0.0073389	0.00600389	0.00545469	1.25991	0.333326	0.0141557	1.03399	0.0482246	0.764168
P30958	mfd	Transcription-repair coupling factor	Cytoplasmic	0.00497118	0.0205463	0.0175463	0.0231995	0.00451361	0.0168531	0.0126849		0.00684586	0.000193505	0.000827875	0.000379587	0.000933252	0.000178333	0.000652333	0.000497973		0.000272423	1.25907	0.332361	0.69824	0.824855	-0.277787	0.73465
P77552	ydhQ	Uncharacterized protein YdhQ	Cytoplasmic	0.00327777	0.0042447	0.00450321	0.00575896	0.00391618	0.00289592	0.00331895		0.00346	0.000127588	0.000171033	9.742e-05	0.000231667	0.000154729	0.000112092	0.000130293		0.000137687	1.25868	0.331909	0.46071	1.01497	0.0214345	0.93528
P31979	nuoF	NADH-ubiquinone oxidoreductase chain F (EC 1.6.5.3)	Inner Membrane	0.0168026	0.0273847	0.0569927	0.0357852	0.0190704	0.0405829	0.0369164	0.037642	0.0255499	0.000654048	0.00110342	0.00123295	0.00143954	0.000753473	0.00157084	0.00144924	0.000546419	0.00101673	1.25864	0.331865	0.455352	1.00735	0.01056	0.982672
P0ADE8	ygfZ	tRNA-modifying protein YgfZ	Cytoplasmic	0.0179498	0.0122407	0.0205643	0.0196284	0.0230975	0.00912194	0.0200592	0.0570617	0.0128751	0.000698701	0.000493219	0.000444877	0.000789597	0.000912583	0.000353082	0.000787469	0.00082832	0.000512351	1.25566	0.328447	0.512729	1.30019	0.378717	0.26745
P46130	ybhC	Pectinesterase (EC 3.1.1.11)	Outer Membrane		0.00185373	0.00350544		0.000752962	0.00410543					7.46926e-05	7.58347e-05		2.97496e-05	0.000158909				1.25332	0.32575	0.817246
P60438	rplC	LSU ribosomal protein L3p (L3e)	Cytoplasmic	0.176219	0.182869	0.278831	0.248007	0.155518	0.239011	0.212401	0.606631	0.165365	0.00685939	0.00736839	0.00603208	0.00997663	0.00614452	0.0092514	0.00833826	0.008806	0.00658052	1.25236	0.324645	0.281616	1.17102	0.22777	0.230627
P0A7D1	pth	Peptidyl-tRNA hydrolase (EC 3.1.1.29)	Cytoplasmic	0.000951947	0.00476707	0.00122599	0.00559518	0.00176215	0.000649106	0.00071229		0.000614248	3.70549e-05	0.000192081	2.65224e-05	0.000225079	6.96225e-05	2.51249e-05	2.79625e-05		2.44433e-05	1.25099	0.323073	0.804631	0.307476	-1.70145	0.385078
P0A7J7	rplK	LSU ribosomal protein L11p (L12e)	Cytoplasmic	0.156272	0.209336	0.223513	0.242612	0.168313	0.201188	0.253559	0.560056	0.182843	0.00608295	0.0084348	0.00483535	0.00975961	0.00665006	0.00778738	0.00995402	0.00812989	0.00727603	1.25029	0.322267	0.312017	1.31038	0.389987	0.208873
P0A8V2	rpoB	DNA-directed RNA polymerase beta subunit (EC 2.7.7.6)	Inner Membrane	0.0723386	0.0709027	0.154851	0.0994429	0.0897707	0.0964107	0.0929522	0.320824	0.0865318	0.00281581	0.0028569	0.00334996	0.00400031	0.00354685	0.00373176	0.00364904	0.00465716	0.00344343	1.25007	0.322004	0.0282134	1.30223	0.38099	0.121035
P15070	fliN	Flagellar motor switch protein FliN	Inner Membrane	0.0185671	0.0274015	0.017743	0.0239399	0.0106319	0.0354311	0.0166364	0.0332012	0.0142807	0.000722731	0.0011041	0.000383843	0.000963034	0.000420067	0.00137143	0.000653098	0.000481956	0.000568284	1.24602	0.317323	0.629255	0.770508	-0.376118	0.504543
P0ABB4	atpD	ATP synthase beta chain (EC 3.6.3.14)	Inner Membrane	0.106571	0.117284	0.217226	0.143824	0.116643	0.168393	0.133862	0.419272	0.137058	0.00414831	0.00472576	0.00469934	0.00578563	0.00460859	0.00651798	0.00525503	0.00608624	0.00545405	1.24598	0.317281	0.174507	1.23737	0.307277	0.0299291
P45395	kdsD	Arabinose 5-phosphate isomerase (EC 5.3.1.13)	Cytoplasmic	0.00123602	0.00110051	0.00170544		0.00227472	0.000448272				4.81126e-05	4.43429e-05	3.68946e-05		8.98744e-05	1.73512e-05				1.24344	0.314332	0.820726	OFF	OFF
P38489	nfsB	Oxygen-insensitive NAD(P)H nitroreductase (EC 1.-.-.-) (Dihydropteridine reductase) (EC 1.5.1.34) (FMN-dependent nitroreductase)	Inner Membrane	0.0179278	0.0105499	0.0191982	0.0185599	0.016363	0.0133838	0.0119723	0.0218234	0.0122646	0.000697845	0.000425088	0.000415324	0.000746613	0.000646503	0.000518046	0.00047	0.000316794	0.000488053	1.24242	0.313154	0.341988	0.828761	-0.270972	0.469391
P00393	ndh	NADH dehydrogenase (EC 1.6.99.3)	Inner Membrane	0.0026564	0.00371812	0.0161942	0.00701669	0.00654358	0.00539387	0.0069796		0.0060352	0.000103401	0.000149815	0.000350337	0.000282262	0.000258537	0.00020878	0.000273999		0.000240164	1.24194	0.3126	0.591902	1.27784	0.353708	0.540494
P0ADF6	edd	Phosphogluconate dehydratase (EC 4.2.1.12)	Cytoplasmic	0.0120293	0.00768959	0.00780939	0.00612519	0.00816931	0.0156758	0.0213543	0.00997674	0.011654	0.000468244	0.000309838	0.000168944	0.000246399	0.00032277	0.000606761	0.000838311	0.000144825	0.000463758	1.24171	0.312326	0.615261	1.52783	0.611481	0.505949
P0A698	uvrA	Excinuclease ABC subunit A	Inner Membrane	0.00222662	0.00292355	0.00296344	0.00407851	0.00166386	0.00267048	0.00552958		0.00116932	8.66718e-05	0.000117799	6.41095e-05	0.000164067	6.57392e-05	0.000103366	0.000217076		4.65318e-05	1.24049	0.310915	0.554931	1.47223	0.558	0.706972
P26646	acuI	Probable acrylyl-CoA reductase AcuI (EC 1.3.1.84) (Acryloyl-coenzyme A reductase AcuI)	Cytoplasmic	0.00480851	0.00400159	0.0055679	0.00667366	0.00449482	0.00350039	0.00322838		0.00442703	0.000187173	0.000161237	0.000120453	0.000268463	0.000177591	0.00013549	0.000126737		0.000176168	1.24033	0.310719	0.455489	0.969064	-0.0453354	0.890735
P00957	alaS	Alanyl-tRNA synthetase (EC 6.1.1.7)	Cytoplasmic	0.022535	0.0330616	0.0651937	0.0462695	0.0299573	0.0372608	0.0292954	0.0555874	0.0174042	0.000877182	0.00133216	0.00141036	0.00186129	0.00118362	0.00144225	0.00115005	0.00080692	0.000692581	1.23965	0.309932	0.326993	0.731981	-0.450121	0.210639
P0A9L8	proC	Pyrroline-5-carboxylate reductase (EC 1.5.1.2)	Cytoplasmic	0.00411834	0.00963921	0.0168096	0.0136374	0.00649038	0.00837749	0.00936436	0.0155393	0.00618964	0.000160308	0.000388395	0.00036365	0.000548596	0.000256435	0.000324267	0.000367618	0.000225572	0.000246309	1.23779	0.307764	0.561858	0.920148	-0.120062	0.791459
P37759	rfbB	dTDP-glucose 4,6-dehydratase (EC 4.2.1.46)	Cytoplasmic	0.0196893	0.0123647	0.0251998	0.0173583	0.0259275	0.0133152	0.0145597	0.0298468	0.0185172	0.000766414	0.000498213	0.000545159	0.000698277	0.0010244	0.000515392	0.000571571	0.000433263	0.00073687	1.23665	0.306432	0.461094	0.962382	-0.0553183	0.859913
P0A6S0	flgH	Flagellar L-ring protein FlgH	Outer Membrane	0.00215084	0.00269514	0.00405468	0.0021841	0.0047245	0.00183419	0.00192882		0.00203351	8.37224e-05	0.000108596	8.77167e-05	8.78601e-05	0.000186665	7.0996e-05	7.57198e-05		8.09212e-05	1.23385	0.303169	0.609574	0.839044	-0.253181	0.183767
P0A7T7	rpsR	SSU ribosomal protein S18p	Cytoplasmic	0.108351	0.0984439	0.182574	0.11195	0.110801	0.156243	0.0885203	0.416328	0.115979	0.00421759	0.00396662	0.0039497	0.00450343	0.00437776	0.0060477	0.00347506	0.00604351	0.00461526	1.23034	0.299062	0.222635	1.16482	0.220107	0.464715
P00363	frdA	Succinate dehydrogenase flavoprotein subunit (EC 1.3.99.1)	Inner Membrane	0.00713253	0.00427897	0.00860513	0.0028802	0.00635482	0.0107152	0.00463039	0.009847	0.00574866	0.000277636	0.000172413	0.000186159	0.000115862	0.000251079	0.000414753	0.000181776	0.000142941	0.000228761	1.22868	0.297105	0.641883	0.869964	-0.200973	0.543563
P02358	rpsF	SSU ribosomal protein S6p	Cytoplasmic	0.135311	0.147335	0.303945	0.232277	0.136034	0.184026	0.204088	0.577024	0.161007	0.00526704	0.00593658	0.00657539	0.00934386	0.00537472	0.00712309	0.00801192	0.00837622	0.00640707	1.22851	0.296908	0.361165	1.28214	0.358555	0.0915776
P76403	yegQ	Uncharacterized protease YegQ (EC 3.4.-.-)	Cytoplasmic	0.00184522	0.00280676	0.00812607	0.00370982	0.00452105	0.00293482	0.00431802	0.00819588	0.00242664	7.18257e-05	0.000113093	0.000175795	0.000149236	0.000178627	0.000113598	0.000169513	0.000118973	9.65654e-05	1.22385	0.291429	0.499265	1.06747	0.0941962	0.83883
P28903	nrdD	Ribonucleotide reductase of class III (anaerobic), large subunit (EC 1.17.4.2)	Cytoplasmic	0.00301393	0.00200622	0.0200499	0.0133224	0.00256581	0.00350103	0.00838602		0.0454354	0.000117318	8.08372e-05	0.000433749	0.000535922	0.000101375	0.000135514	0.000329211		0.00180805	1.22299	0.290412	0.806479	5.07338	2.34295	0.449812
P0ADU2	ygiN	Probable quinol monooxygenase YgiN (QuMo) (EC 1.-.-.-)	Cytoplasmic	0.0106055	0.00869665	0.00825178	0.0126994	0.00669091	0.00972417	0.0173279	0.0637588	0.00628428	0.000412824	0.000350416	0.000178514	0.00051086	0.000264358	0.000376393	0.000680244	0.000925537	0.000250076	1.22284	0.29023	0.522498	1.97064	0.978662	0.258952
P0A7Z4	rpoA	DNA-directed RNA polymerase alpha subunit (EC 2.7.7.6)	Inner Membrane	0.0935104	0.114181	0.215459	0.131942	0.131379	0.135664	0.133203	0.258546	0.0958334	0.00363993	0.00460071	0.00466111	0.00530764	0.0051908	0.00525112	0.00522917	0.00375311	0.00381358	1.22073	0.287746	0.101513	0.991793	-0.0118896	0.955122
P29745	pepT	Peptidase T (EC 3.4.11.4) (Aminotripeptidase) (Tripeptidase) (Tripeptide aminopeptidase)	Cytoplasmic	0.00313903	0.00386771	0.0023581	0.00514989	0.00182514	0.00315126	0.00587669		0.00189457	0.000122188	0.000155843	5.10138e-05	0.000207166	7.21115e-05	0.000121976	0.000230702		7.53923e-05	1.21945	0.28623	0.657337	1.39538	0.480657	0.677153
P23003	trmA	tRNA/tmRNA (uracil-C(5))-methyltransferase (EC 2.1.1.-) (EC 2.1.1.35) (tRNA (uracil(54)-C(5))-methyltransferase) (tRNA(m5U54)-methyltransferase) (RUMT) (tmRNA (uracil(341)-C(5))-methyltransferase)	Cytoplasmic	0.00175316		0.00106132		0.00177662	0.00105038				6.82425e-05		2.29601e-05		7.01944e-05	4.0657e-05				1.21544	0.281481	0.755992
P37744	rfbA	Glucose-1-phosphate thymidylyltransferase (EC 2.7.7.24)	Periplasmic	0.0148652	0.00918065	0.0145368	0.0201373	0.0106724	0.00783857	0.0172327	0.0445162	0.0110069	0.000578635	0.000369918	0.000314481	0.000810068	0.000421666	0.000303407	0.000676508	0.000646208	0.000438006	1.21544	0.281479	0.635825	1.39404	0.479275	0.206149
P0AG30	rho	Transcription termination factor Rho	Inner Membrane	0.0288197	0.0295494	0.0601532	0.038019	0.0329996	0.0398731	0.0234279	0.127224	0.0262802	0.00112182	0.00119064	0.00130132	0.0015294	0.00130382	0.00154336	0.000919713	0.00184681	0.00104579	1.21108	0.276295	0.0613648	1.05494	0.0771579	0.842191
P0A749	murA	UDP-N-acetylglucosamine 1-carboxyvinyltransferase (EC 2.5.1.7)	Cytoplasmic	0.00721729	0.00657622	0.0150465	0.0116401	0.00611777	0.00890442	0.0139955	0.0635156	0.00582849	0.000280936	0.000264977	0.000325507	0.00046825	0.000241714	0.000344663	0.000549424	0.000922006	0.000231938	1.21024	0.275293	0.452624	1.95471	0.966952	0.298468
P04693	tyrB	Biosynthetic Aromatic amino acid aminotransferase alpha (EC 2.6.1.57)	Cytoplasmic	0.00455372	0.00422864	0.00673375	0.00619933	0.0058542	0.00294989	0.00735871	0.0164469	0.00414013	0.000177255	0.000170385	0.000145674	0.000249382	0.0002313	0.000114181	0.000288882	0.000238747	0.000164752	1.20585	0.270048	0.51084	1.40353	0.489057	0.20148
P33602	nuoG	NADH-ubiquinone oxidoreductase chain G (EC 1.6.5.3)	Inner Membrane	0.0282361	0.0157259	0.0547631	0.0321762	0.021737	0.0347352	0.0266441	0.0616741	0.0417874	0.0010991	0.000633648	0.00118472	0.00129436	0.00085883	0.00134449	0.00104597	0.000895275	0.00166288	1.19888	0.261685	0.448988	1.23536	0.304935	0.478806
P03018	uvrD	ATP-dependent DNA helicase UvrD/PcrA	Cytoplasmic	0.00375136	0.00176317	0.00470793	0.00482215	0.00271202	0.00209321	0.00512641		0.00257717	0.000146023	7.10437e-05	0.000101849	0.000193982	0.000107152	8.10216e-05	0.000201248		0.000102556	1.1983	0.260985	0.634678	1.42892	0.514929	0.517712
P0AAI5	fabF	3-oxoacyl-[acyl-carrier-protein] synthase, KASII (EC 2.3.1.179)	Inner Membrane	0.0317583	0.0234783	0.0360097	0.0324186	0.0316683	0.0253868	0.0286824	0.100367	0.0233435	0.0012362	0.000946016	0.000779014	0.00130411	0.00125122	0.000982643	0.00112599	0.00145694	0.000928925	1.19476	0.256724	0.317531	1.18594	0.246037	0.419866
P0A9S3	gatD	Galactitol-1-phosphate 5-dehydrogenase (EC 1.1.1.251)	Inner Membrane	0.00702961	0.0100946	0.0236744	0.0107683	0.0149746	0.0103044	0.00931923	0.0334162	0.0101923	0.00027363	0.000406743	0.00051216	0.000433177	0.000591648	0.000398851	0.000365846	0.000485077	0.000405592	1.19383	0.255593	0.446033	1.05365	0.0753991	0.800974
P0AGG8	tldD	TldD protein, part of TldE/TldD proteolytic complex	Cytoplasmic	0.00358678	0.00343755	0.00554972	0.00347623	0.00447255	0.00406267	0.00244666	0.00307974	0.00364989	0.000139616	0.00013851	0.00012006	0.000139839	0.000176711	0.000157253	9.60489e-05	4.47062e-05	0.000145243	1.1899	0.250846	0.127562	0.718253	-0.477436	0.325636
P77247	yniC	2-deoxyglucose-6-phosphate hydrolase YniC	Cytoplasmic	0.00276555	0.000769054	0.000872848	0.00226431	0.00138912	0.00106573				0.00010765	3.09876e-05	1.88827e-05	9.1087e-05	5.4884e-05	4.12513e-05				1.18856	0.249212	0.773654	OFF	OFF
P37747	glf	UDP-galactopyranose mutase (EC 5.4.99.9)	Cytoplasmic	0.00919145	0.00640133	0.0139804	0.00849167	0.0140037	0.00507144	0.00970434	0.0247542	0.0126408	0.000357781	0.00025793	0.000302444	0.000341596	0.000553287	0.0001963	0.000380965	0.000359337	0.000503026	1.18845	0.249085	0.639142	1.35416	0.437398	0.123292
P0A7G6	recA	Protein RecA (Recombinase A)	Inner Membrane	0.026947	0.0346646	0.0425041	0.0430074	0.0401604	0.017601	0.0273893	0.0546591	0.0216769	0.00104892	0.00139675	0.00091951	0.00173007	0.00158674	0.000681282	0.00107523	0.000793444	0.000862605	1.18808	0.248628	0.600792	0.811629	-0.301108	0.285829
P22333	add	Adenosine deaminase (EC 3.5.4.4)	Inner Membrane	0.00829759	0.0068641	0.0151404	0.012064	0.00998686	0.0056422	0.00580338	0.0139192	0.00886918	0.000322987	0.000276577	0.000327538	0.000485303	0.000394581	0.000218392	0.000227824	0.000202054	0.000352938	1.18463	0.244442	0.544666	0.84437	-0.244053	0.415053
P0A8W2	slyA	Transcriptional regulator SlyA	Cytoplasmic	0.00156063	0.00303991	0.00440943	0.00386742	0.00225361	0.00220034	0.00322478	0.0142109	0.0011698	6.0748e-05	0.000122488	9.53912e-05	0.000155575	8.90402e-05	8.51683e-05	0.000126596	0.000206289	4.6551e-05	1.1836	0.243187	0.589934	1.36181	0.44552	0.552592
P21599	pykA	Pyruvate kinase (EC 2.7.1.40)	Inner Membrane	0.0444167	0.0512258	0.0812136	0.069759	0.0442136	0.0520628	0.0482887	0.216864	0.0582912	0.00172894	0.00206405	0.00175693	0.00280621	0.00174688	0.00201519	0.00189568	0.00314804	0.00231963	1.18349	0.24305	0.401052	1.32675	0.407895	0.237368
P45464	lpoA	Penicillin-binding protein activator LpoA (PBP activator LpoA) (Lipoprotein activator of PBP from the outer membrane A)	Outer Membrane	0.000886104	0.00334257	0.0118606	0.00230793	0.00670202	0.00376807	0.0021869		0.000958706	3.44919e-05	0.000134683	0.000256586	9.28418e-05	0.000264797	0.00014585	8.58515e-05		3.81506e-05	1.18256	0.241917	0.768356	0.436872	-1.19472	0.342688
P0A9P4	trxB	Thioredoxin reductase (EC 1.8.1.9)	Periplasmic	0.0201687	0.0203457	0.0215015	0.0235587	0.0180887	0.0202705	0.0165812	0.0639674	0.0148343	0.000785073	0.000819792	0.000465152	0.000947701	0.000714684	0.000784609	0.000650932	0.000928566	0.000590312	1.18211	0.241368	0.406264	1.04821	0.0679255	0.839178
P0AAB4	ubiD	3-polyprenyl-4-hydroxybenzoate carboxy-lyase (EC 4.1.1.-)	Inner Membrane	0.00342361	0.00107784	0.00420264	0.00156127	0.0045246	0.00192616				0.000133265	4.34296e-05	9.09176e-05	6.28055e-05	0.000178767	7.45556e-05				1.18129	0.240364	0.739816	OFF	OFF
P0AB80	ilvE	Branched-chain amino acid aminotransferase (EC 2.6.1.42)	Cytoplasmic	0.00525076	0.00399004	0.0131171	0.00822891	0.00655909	0.00454676				0.000204388	0.000160772	0.000283767	0.000331026	0.00025915	0.000175991				1.18067	0.239604	0.535433	OFF	OFF
P75876	rlmI	LSU m5C1962 methyltransferase RlmI	Inner Membrane	0.00373086	0.00265149	0.00299839	0.00381954	0.00304599	0.00258236				0.000145225	0.000106837	6.48656e-05	0.000153649	0.000120347	9.99552e-05				1.17993	0.238699	0.539203	OFF	OFF
P0A705	infB	Translation initiation factor 2	Inner Membrane	0.0481743	0.0355189	0.0796665	0.0507741	0.0426423	0.0569832	0.0511457	0.194115	0.0399339	0.0018752	0.00143117	0.00172346	0.0020425	0.0016848	0.00220565	0.00200783	0.00281782	0.00158912	1.17955	0.238237	0.211514	1.27535	0.350888	0.329689
P07464	lacA	Galactoside O-acetyltransferase (EC 2.3.1.18)	Cytoplasmic	0.00302953	0.00192828	0.0108157	0.00119843	0.00729715		0.00426528		0.00488249	0.000117926	7.76964e-05	0.000233982	4.82094e-05	0.000288311		0.000167443		0.000194293	1.17499	0.232648	0.871555	1.26303	0.336891	0.510844
P37689	gpmI	2,3-bisphosphoglycerate-independent phosphoglycerate mutase (EC 5.4.2.1)	Cytoplasmic	0.0101991	0.00909821	0.0175892	0.00596284	0.0157001	0.0124596	0.0103229	0.0198299	0.00237285	0.000397003	0.000366596	0.000380515	0.000239869	0.000620312	0.000482273	0.000405246	0.000287856	9.44247e-05	1.17336	0.230641	0.612805	0.688329	-0.538831	0.319633
P21889	aspS	Aspartyl-tRNA synthetase (EC 6.1.1.12)	Inner Membrane	0.0374665	0.0325554	0.0516542	0.0359986	0.0350915	0.0443989	0.042269	0.0844864	0.0421363	0.0014584	0.00131176	0.00111746	0.00144812	0.00138647	0.00171854	0.00165936	0.00122642	0.00167677	1.17119	0.227973	0.193212	1.17361	0.230953	0.282457
P0ADG4	suhB	Inositol-1-monophosphatase (I-1-Pase) (IMPase) (Inositol-1-phosphatase) (EC 3.1.3.25)	Inner Membrane	0.00813375	0.00949374	0.0168342	0.0119642	0.0136297	0.00580312	0.0107269		0.00954901	0.000316609	0.000382533	0.000364182	0.000481288	0.00053851	0.000224621	0.000421107		0.000379991	1.17031	0.226891	0.598152	1.13009	0.176432	0.217703
P0AF20	nagC	N-acetylglucosamine-6P-responsive transcriptional repressor NagC, ROK family	Cytoplasmic	0.00413418	0.00319733	0.00518986	0.00606037	0.00258761	0.00320959	0.00538006		0.00254618	0.000160924	0.000128831	0.000112275	0.000243792	0.000102237	0.000124233	0.000211206		0.000101322	1.16972	0.226163	0.663927	1.16606	0.221647	0.755793
P0A7I7	ribA	GTP cyclohydrolase II (EC 3.5.4.25)	Cytoplasmic	0.00107256	0.00142712	0.000793604	0.000706989		0.00160805				4.17498e-05	5.75033e-05	1.71684e-05	2.84402e-05		6.22427e-05				1.16838	0.224508	0.781336	OFF	OFF
P0A7W7	rpsH	SSU ribosomal protein S8p (S15Ae)	Cytoplasmic	0.155974	0.207606	0.348735	0.198524	0.189569	0.26318	0.141538	0.703917	0.210595	0.00607136	0.0083651	0.00754433	0.00798605	0.00748989	0.0101869	0.0055564	0.0102182	0.00838037	1.16751	0.223437	0.31643	1.09891	0.136077	0.66541
P0A7U7	rpsT	SSU ribosomal protein S20p	Cytoplasmic	0.118931	0.109388	0.194764	0.138563	0.106709	0.146612	0.112445	0.244891	0.162835	0.00462943	0.0044076	0.00421342	0.00557399	0.00421609	0.0056749	0.00441428	0.0035549	0.00647983	1.16713	0.222965	0.253732	1.09045	0.124929	0.691686
P00961	glyS	Glycine--tRNA ligase beta subunit (EC 6.1.1.14) (Glycyl-tRNA synthetase beta subunit) (GlyRS)	Inner Membrane	0.0135398	0.0164162	0.030688	0.0188451	0.0219391	0.0137007	0.0170162	0.0223794	0.0204052	0.000527043	0.000661463	0.000663888	0.000758086	0.000866817	0.00053031	0.000668009	0.000324865	0.000812001	1.16347	0.21844	0.427067	0.974348	-0.0374914	0.92482
P04825	pepN	Membrane alanine aminopeptidase N (EC 3.4.11.2)	Inner Membrane	0.0354372	0.0481618	0.0694177	0.056583	0.040141	0.0451458	0.052793	0.169786	0.0267058	0.00137941	0.00194059	0.00150175	0.00227618	0.00158597	0.00174745	0.0020725	0.00246465	0.00106273	1.1634	0.218344	0.386562	1.16138	0.21584	0.610402
P0A8G9	xseB	Exodeoxyribonuclease VII small subunit (EC 3.1.11.6)	Cytoplasmic	0.00903825		0.0143454		0.0143368	0.00526569				0.000351817		0.00031034		0.00056645	0.000203819				1.16327	0.218188	0.815704
P0ACF0	hupA	DNA-binding protein HU-alpha	Cytoplasmic	0.134482	0.0976624	0.382942	0.167984	0.139993	0.2052	0.20813	0.470587	0.215104	0.00523476	0.00393513	0.00828435	0.00675754	0.00553112	0.00794268	0.00817059	0.00683114	0.00855983	1.15911	0.213013	0.571308	1.3499	0.432857	0.251206
P25888	rhlE	ATP-dependent RNA helicase RhlE	Inner Membrane	0.00750508	0.00149478	0.00112371	0.00169275	0.00435255	0.00506919	0.00279644		0.00245458	0.000292138	6.02296e-05	2.43097e-05	6.80945e-05	0.000171969	0.000196213	0.00010978		9.76772e-05	1.15823	0.211916	0.844737	0.826136	-0.275549	0.819352
P24186	folD	Methylenetetrahydrofolate dehydrogenase (NADP+) (EC 1.5.1.5)	Cytoplasmic	0.000743073	0.0036849	0.00393347		0.00168524	0.00351256				2.89244e-05	0.000148476	8.50946e-05		6.65839e-05	0.00013596				1.15742	0.210909	0.798854	OFF	OFF
P0A7X3	rpsI	SSU ribosomal protein S9p (S16e)	Cytoplasmic	0.20496	0.257749	0.359595	0.259207	0.213212	0.293859	0.241967	0.815271	0.286663	0.00797816	0.0103855	0.00777928	0.0104272	0.008424	0.0113744	0.00949893	0.0118347	0.0114074	1.15616	0.209344	0.322833	1.25238	0.324675	0.118621
P0A9R4	fdx	Ferredoxin, 2Fe-2S	Cytoplasmic	0.00448078	0.00603112	0.00518127	0.00322338	0.00857146	0.00369105	0.00668214		0.0057553	0.000174416	0.000243013	0.000112089	0.000129668	0.000338659	0.000142869	0.000262322		0.000229025	1.15425	0.206955	0.7474	1.39187	0.477026	0.204491
P0A7M9	rpmE	LSU ribosomal protein L31p	Cytoplasmic	0.123221	0.126318	0.188263	0.102543	0.194422	0.111189	0.164119	0.214979	0.116867	0.00479644	0.00508975	0.00407277	0.00412501	0.00768164	0.00430378	0.00644284	0.00312069	0.00465059	1.15413	0.206803	0.603074	1.01828	0.0261321	0.93921
P0A9A9	fur	Ferric uptake regulation protein FUR	Cytoplasmic	0.0345952	0.0403458	0.0556187	0.0340008	0.0442787	0.0439602	0.0405062	0.0514249	0.0250233	0.00134663	0.00162566	0.00120322	0.00136776	0.00174945	0.00170156	0.00159016	0.000746496	0.000995773	1.15406	0.206713	0.282074	0.798087	-0.325381	0.390114
P0A998	ftnA	Bacterial non-heme ferritin (EC 1.16.3.2) (Ferritin-1)	Cytoplasmic	0.0375371	0.00893421	0.0254874	0.00533416	0.0416212	0.0226432	0.0055129	0.0783105	0.0207247	0.00146114	0.000359988	0.00055138	0.000214579	0.00164446	0.000876448	0.000216421	0.00113677	0.000824716	1.15299	0.205381	0.83252	0.917977	-0.123471	0.888782
P0ACD4	iscU	Iron-sulfur cluster assembly scaffold protein IscU	Inner Membrane	0.0580405	0.0257329	0.064872	0.0370329	0.0557241	0.0440432	0.0388379	0.069364	0.0418646	0.00225925	0.00103686	0.0014034	0.00148973	0.00220166	0.00170478	0.00152467	0.0010069	0.00166595	1.14824	0.199425	0.615705	0.893183	-0.162973	0.712134
P0ADT5	ygiC	Similarity with glutathionylspermidine synthase (EC 6.3.1.8), group 1	Cytoplasmic	0.00173098	0.0022823	0.00307313	0.00179891	0.00320107	0.00155383	0.00286614		0.00654905	6.73789e-05	9.1961e-05	6.64823e-05	7.23652e-05	0.000126474	6.01441e-05	0.000112517		0.000260612	1.14685	0.197674	0.654395	2.47846	1.30945	0.371264
P00452	nrdA	Ribonucleotide reductase of class Ia (aerobic), alpha subunit (EC 1.17.4.1)	Inner Membrane	0.00784345	0.00762389	0.0213299	0.0114161	0.0149418	0.00466807	0.0123405	0.0162018	0.0100779	0.000305309	0.000307191	0.000461439	0.000459239	0.000590352	0.000180687	0.000484451	0.000235189	0.000401037	1.14557	0.196071	0.7208	1.04352	0.0614588	0.871414
P0AFG0	nusG	Transcription antitermination protein NusG	Inner Membrane	0.0264072	0.0169505	0.0444635	0.0171319	0.0257549	0.034978	0.030539	0.0811237	0.0215638	0.00102791	0.000682988	0.0009619	0.00068917	0.00101758	0.00135389	0.00119887	0.00117761	0.000858105	1.14511	0.195482	0.595247	1.21019	0.275232	0.287463
P00490	malP	Maltodextrin phosphorylase (EC 2.4.1.1)	Inner Membrane	0.0116835	0.0157371	0.0502953	0.0155176	0.0171	0.0308135	0.0169326	0.0560067	0.0189557	0.000454784	0.000634097	0.00108806	0.000624231	0.000675623	0.00119269	0.000664725	0.000813005	0.000754318	1.14498	0.195318	0.708232	1.02531	0.0360651	0.932231
P0A715	kdsA	2-Keto-3-deoxy-D-manno-octulosonate-8-phosphate synthase (EC 2.5.1.55)	Cytoplasmic	0.0199761	0.0106292	0.033211	0.0181207	0.0214508	0.0159354	0.0317553	0.0709354	0.0180796	0.000777576	0.000428285	0.000718469	0.000728946	0.000847523	0.000616809	0.00124662	0.00102971	0.000719458	1.13976	0.188733	0.525954	1.5568	0.638583	0.137058
P0AFP6	ybgI	GTP cyclohydrolase 1 type 2 homolog (Radiation resistance protein YbgI)	Cytoplasmic	0.0166958	0.0112969	0.0350708	0.00604656	0.0313706	0.0164892	0.00941228	0.0233813	0.0144076	0.000649889	0.00045519	0.000758703	0.000243236	0.00123945	0.000638247	0.000369499	0.000339409	0.000573334	1.13797	0.186467	0.800031	0.687979	-0.539564	0.170329
P05042	fumC	Fumarate hydratase class II (EC 4.2.1.2)	Inner Membrane	0.016375	0.0315777	0.0367237	0.0383796	0.0179942	0.0212369	0.0210811	0.0358136	0.0159527	0.000637402	0.00127237	0.000794461	0.0015439	0.000710953	0.000822017	0.000827582	0.000519879	0.000634817	1.1378	0.186247	0.722217	0.733029	-0.448058	0.34095
P0A6V1	glgC	Glucose-1-phosphate adenylyltransferase (EC 2.7.7.27)	Cytoplasmic	0.00423318	0.00743717	0.011788	0.00702172	0.00659677	0.00711146	0.011687		0.0033778	0.000164778	0.000299667	0.000255016	0.000282464	0.000260639	0.000275263	0.0004588		0.000134415	1.13747	0.185829	0.494517	1.23679	0.306601	0.786422
P0A6X7	ihfA	Integration host factor alpha subunit	Cytoplasmic	0.0361324	0.0454858	0.0760822	0.0391332	0.0406784	0.0612049	0.0359189	0.0677942	0.0417075	0.00140647	0.00183277	0.00164592	0.00157422	0.00160721	0.00236905	0.00141007	0.000984116	0.0016597	1.13619	0.184207	0.499104	0.829838	-0.269099	0.310964
P0A6F5	groL	Heat shock protein 60 family chaperone GroEL	Inner Membrane	0.208954	0.214319	0.402494	0.200015	0.240891	0.29339	0.224612	0.649201	0.288721	0.0081336	0.00863559	0.00870734	0.00804604	0.00951761	0.0113562	0.00881763	0.00942395	0.0114893	1.13516	0.182893	0.353099	1.16699	0.222792	0.217702
P0A7V0	rpsB	SSU ribosomal protein S2p (SAe)	Cytoplasmic	0.139554	0.15826	0.319428	0.187765	0.17197	0.177122	0.151312	0.500557	0.198173	0.00543218	0.0063768	0.00691033	0.00755325	0.00679456	0.00685585	0.00594009	0.00726621	0.00788607	1.13272	0.179787	0.189154	1.12677	0.172194	0.337056
P0ACE7	hinT	Purine nucleoside phosphoramidase (EC 3.9.1.-) (Histidine triad nucleotide binding protein HinT) (HIT protein)	Inner Membrane	0.0117991	0.0168128	0.00731598	0.0142846	0.013705	0.00902514	0.010828		0.0139903	0.000459283	0.000677443	0.00015827	0.000574631	0.000541487	0.000349336	0.000425078		0.000556728	1.13163	0.178399	0.756076	1.13723	0.185525	0.745235
P0ABA4	atpH	ATP synthase delta chain (EC 3.6.3.14)	Inner Membrane	0.00667434	0.00738654	0.0282571	0.00906101	0.00883878	0.015711	0.00963278	0.0266092	0.0195072	0.000259801	0.000297627	0.000611298	0.000364499	0.000349221	0.000608126	0.000378155	0.000386266	0.000776265	1.13101	0.177617	0.734218	1.31826	0.398636	0.512444
P0A988	dnaN	DNA polymerase III beta subunit (EC 2.7.7.7)	Cytoplasmic	0.00297297	0.00388494	0.00944024	0.0051424	0.00200796	0.00647644	0.00467642	0.0155746	0.00273117	0.000115724	0.000156537	0.000204225	0.000206865	7.93346e-05	0.000250683	0.000183583	0.000226084	0.000108683	1.12676	0.172174	0.74948	1.08786	0.121496	0.761987
P17846	cysI	Sulfite reductase [NADPH] hemoprotein beta-component (EC 1.8.1.2)	Cytoplasmic	0.00675126	0.0221572	0.00930425	0.00652176	0.00493728	0.0276506	0.0042221	0.00555355	0.00591778	0.000262795	0.000892785	0.000201283	0.000262352	0.000195072	0.00107027	0.000165748	8.06166e-05	0.000235491	1.1259	0.171082	0.881613	0.355125	-1.4936	0.316609
P0A6R3	fis	DNA-binding protein Fis	Cytoplasmic	0.0105483	0.0109836	0.0260432	0.0120137	0.00775872	0.0207657	0.0210119	0.108988	0.0183124	0.000410595	0.000442565	0.000563405	0.000483278	0.000306548	0.000803776	0.000824866	0.0015821	0.000728719	1.12498	0.169894	0.730872	2.21358	1.14638	0.16428
P0ACF4	hupB	DNA-binding protein HU-beta	Cytoplasmic	0.147472	0.155239	0.328172	0.14683	0.149031	0.249964	0.200673	0.208308	0.105588	0.0057404	0.00625507	0.00709949	0.00590656	0.00588823	0.00967535	0.00787784	0.00302385	0.00420174	1.12439	0.16914	0.600649	0.790964	-0.338315	0.461958
P37590	pmrD	Polymyxin resistance protein PmrD	Cytoplasmic	0.0057364		0.00863344	0.00939903	0.00539074	0.002586				0.000223292		0.000186771	0.000378097	0.000212988	0.000100096				1.1237	0.168258	0.785881
P0A9Q5	accD	Acetyl-coenzyme A carboxyl transferase beta chain (EC 6.4.1.2)	Inner Membrane	0.0158333	0.0130496	0.0351081	0.0220158	0.0201861	0.0116952	0.0140022	0.0308815	0.0163052	0.000616315	0.000525812	0.000759509	0.000885634	0.000797554	0.000452685	0.000549688	0.000448283	0.000648845	1.12318	0.167585	0.635734	0.866	-0.207562	0.396819
P0A8E7	yajQ	UPF0234 protein YajQ	Cytoplasmic	0.00968996	0.0138307	0.0161359	0.0176593	0.0100723	0.00855889	0.0122643	0.0166707	0.00879872	0.000377185	0.000557283	0.000349076	0.000710385	0.000397959	0.000331288	0.000481462	0.000241995	0.000350135	1.12161	0.165567	0.72233	0.836428	-0.257687	0.502836
P33195	gcvP	Glycine dehydrogenase [decarboxylating] (glycine cleavage system P protein) (EC 1.4.4.2)	Inner Membrane	0.0596255	0.0670796	0.115094	0.0613393	0.095598	0.0560644	0.0504696	0.113087	0.0826745	0.00232094	0.00270285	0.00248989	0.00246751	0.00377708	0.00217008	0.00198129	0.00164159	0.00328993	1.11991	0.163386	0.608047	0.92003	-0.120247	0.731649
P09831	gltB	Glutamate synthase [NADPH] large chain (EC 1.4.1.13)	Inner Membrane	0.00360661	0.00601641	0.0111094	0.00443358	0.00790705	0.0053393	0.0066111		0.0100482	0.000140389	0.000242421	0.000240335	0.000178351	0.000312408	0.000206668	0.000259533		0.000399856	1.11921	0.162475	0.664891	1.58725	0.666525	0.298364
P77376	ydgJ	Uncharacterized oxidoreductase YdgJ (EC 1.-.-.-)	Cytoplasmic	0.00234864	0.00228682	0.00143659	0.00241767	0.00202264	0.00162288				9.14216e-05	9.21433e-05	3.10783e-05	9.72561e-05	7.99145e-05	6.28165e-05				1.11808	0.161017	0.733499	OFF	OFF
P77348	mppA	Periplasmic Murein Peptide-Binding Protein MppA	Periplasmic	0.000848233	0.00220308	0.00255027	0.00141241	0.00177088	0.00183452				3.30178e-05	8.87692e-05	5.51712e-05	5.68175e-05	6.99677e-05	7.10085e-05				1.11774	0.160588	0.715101	OFF	OFF
P0AE12	amn	AMP nucleosidase (EC 3.2.2.4)	Cytoplasmic	0.00175646	0.00205308	0.00537088	0.000788625	0.0053132	0.00146974				6.83709e-05	8.27252e-05	0.000116191	3.17242e-05	0.000209925	5.68893e-05				1.11692	0.159529	0.87112	OFF	OFF
P07639	aroB	3-dehydroquinate synthase (EC 4.2.3.4)	Cytoplasmic	0.00340452	0.00188102	0.00550514	0.00312316	0.00256511	0.00355798	0.00251075	0.0014651	0.00117229	0.000132522	7.57922e-05	0.000119095	0.000125636	0.000101348	0.000137718	9.85648e-05	2.12677e-05	4.66499e-05	1.1139	0.155622	0.577247	0.508484	-0.975726	0.13808
P0ACG1	stpA	DNA-binding protein StpA (H-NS homolog StpA)	Cytoplasmic	0.00378497	0.00522121	0.00871282	0.00177468	0.00342209	0.0103756		0.00637339	0.000685631	0.000147331	0.000210379	0.000188488	7.13905e-05	0.000135207	0.000401607		9.25176e-05	2.72839e-05	1.11352	0.15513	0.858214	0.329005	-1.60382	0.10527
P0AC92	gnsA	Protein GnsA	Inner Membrane	0.000933304	0.0018021	0.00317264	0.000768388	0.0029895	0.00125384	0.000925439		0.00354068	3.63292e-05	7.26125e-05	6.86352e-05	3.09101e-05	0.000118115	4.85322e-05	3.63301e-05		0.000140897	1.11252	0.153829	0.834497	1.49705	0.58212	0.673367
P69441	adk	Adenylate kinase (EC 2.7.4.3)	Inner Membrane	0.034176	0.0443321	0.0544954	0.0441577	0.0430022	0.0336717	0.0600365	0.159041	0.0491608	0.00133031	0.00178628	0.00117892	0.00177634	0.00169902	0.00130333	0.00235686	0.00230867	0.00195629	1.11248	0.153782	0.530859	1.54157	0.624397	0.0302536
P0A794	pdxJ	Pyridoxine 5'-phosphate synthase (EC 2.6.99.2)	Cytoplasmic	0.00776818	0.0124512	0.018015	0.0158319	0.00950578	0.00814725	0.00587078	0.0104878	0.00627732	0.000302379	0.000501701	0.000389726	0.000636873	0.000375574	0.000315355	0.00023047	0.000152243	0.000249798	1.11224	0.153472	0.720378	0.529828	-0.916405	0.0635233
P28904	treC	Trehalose-6-phosphate hydrolase (EC 3.2.1.93)	Inner Membrane	0.0415604	0.026894	0.0485511	0.0392983	0.0373945	0.028742	0.0365131	0.0652987	0.0297151	0.00161775	0.00108365	0.00105033	0.00158086	0.00147746	0.00111251	0.0014334	0.000947891	0.00118248	1.11171	0.15278	0.581989	0.9499	-0.0741518	0.800686
P0A7M6	rpmC	LSU ribosomal protein L29p (L35e)	Cytoplasmic	0.100082	0.0421811	0.093394	0.06205	0.0701993	0.0825148	0.0850544	0.308855	0.0900293	0.00389571	0.00169961	0.00202043	0.0024961	0.00277358	0.00319389	0.003339	0.00448341	0.00358261	1.11132	0.15228	0.725466	1.49755	0.582609	0.199649
P0A9J0	rng	Cytoplasmic axial filament protein CafA and Ribonuclease G (EC 3.1.4.-)	Cytoplasmic	0.0014223		0.00883054		0.00155391	0.00547904	0.00061532		0.000985405	5.53636e-05		0.000191035		6.13951e-05	0.000212077	2.41557e-05		3.9213e-05	1.10987	0.150397	0.906122	0.25718	-1.95915	0.403992
P76290	cmoA	Carboxy-S-adenosyl-L-methionine synthase (Cx-SAM synthase) (EC 2.1.3.-)	Cytoplasmic	0.0006151	0.0029485		0.00287401	0.0010835					2.3943e-05	0.000118804		0.000115614	4.28092e-05					1.10981	0.150315	0.908407
P0A6K6	deoB	Phosphopentomutase (EC 5.4.2.7)	Inner Membrane	0.0188818	0.0201364	0.0284654	0.0229276	0.0227319	0.0146883	0.0183411	0.0431574	0.0173283	0.000734983	0.000811359	0.000615804	0.000922315	0.000898138	0.000568538	0.00072002	0.000626482	0.000689561	1.10492	0.143938	0.595733	0.941686	-0.0866814	0.555389
P0A9U3	ybiT	Uncharacterized ABC transporter ATP-binding protein YbiT	Inner Membrane	0.00430365	0.00428628	0.00732345	0.00596431	0.00424994	0.00369731	0.00512971		0.00472777	0.000167521	0.000172708	0.000158432	0.000239928	0.000167915	0.000143111	0.000201378		0.000188136	1.10487	0.143875	0.610505	1.17168	0.228579	0.0784832
P76034	yciT	Uncharacterized HTH-type transcriptional regulator YciT	Cytoplasmic	0.00143019	0.00489738	0.00266943	0.00397976	0.00163968	0.00304835	0.0027549		0.00243154	5.56708e-05	0.000197331	5.77489e-05	0.000160094	6.47838e-05	0.000117992	0.000108149		9.67602e-05	1.10336	0.141906	0.855661	0.989102	-0.0158082	0.983045
P13024	fdhE	formate dehydrogenase formation protein FdhE	Cytoplasmic	0.00325397	0.00345332	0.0072037	0.00328343	0.00591172	0.00256905	0.00561997	0.00499973	0.00336298	0.000126662	0.000139145	0.000155841	0.000132083	0.000233572	9.94402e-05	0.000220624	7.25772e-05	0.000133826	1.10304	0.141488	0.756701	1.01276	0.0182879	0.97081
P0A7E9	pyrH	Uridylate kinase (UK) (EC 2.7.4.22) (Uridine monophosphate kinase) (UMP kinase) (UMPK)	Inner Membrane	0.00353034	0.000854736	0.0118479		0.00474266	0.00329248				0.00013742	3.444e-05	0.000256311		0.000187383	0.000127442				1.10292	0.141323	0.850162	OFF	OFF
P0A7V3	rpsC	SSU ribosomal protein S3p (S3e)	Cytoplasmic	0.192558	0.20844	0.407586	0.223009	0.240423	0.226436	0.227576	0.718029	0.244075	0.00749538	0.00839873	0.0088175	0.00897103	0.00949912	0.00876463	0.00893399	0.0104231	0.00971269	1.10211	0.140262	0.152375	1.17636	0.23433	0.0672033
P07395	pheT	Phenylalanyl-tRNA synthetase beta chain (EC 6.1.1.20)	Inner Membrane	0.0265879	0.0269577	0.0611288	0.0346591	0.032826	0.028477	0.0298143	0.209001	0.0310837	0.00103494	0.00108621	0.00132243	0.00139424	0.00129696	0.00110226	0.00117042	0.00303391	0.00123694	1.1016	0.139603	0.397861	1.58012	0.660033	0.389281
P0AD61	pykF	Pyruvate kinase (EC 2.7.1.40)	Inner Membrane	0.0394656	0.0454579	0.0975612	0.0586409	0.0515973	0.0422925	0.0474157	0.115156	0.0381397	0.00153621	0.00183164	0.00211058	0.00235896	0.00203861	0.00163701	0.00186141	0.00167164	0.00151772	1.10151	0.139489	0.527074	0.921935	-0.117262	0.51023
P60723	rplD	LSU ribosomal protein L4p (L1e)	Cytoplasmic	0.152893	0.19074	0.169202	0.141987	0.165716	0.175213	0.157952	0.499164	0.151554	0.00595142	0.00768551	0.00366043	0.00571173	0.00654746	0.00678197	0.00620076	0.00724597	0.00603093	1.10081	0.138569	0.672693	1.12605	0.171268	0.604051
P0A7W1	rpsE	SSU ribosomal protein S5p (S2e)	Cytoplasmic	0.230453	0.204946	0.40585	0.227546	0.242417	0.255678	0.23919	0.696449	0.215095	0.00897048	0.00825792	0.00877994	0.00915354	0.00957789	0.00989652	0.00938991	0.0101098	0.00855944	1.10072	0.13845	0.0448406	1.07885	0.109498	0.266035
P0ABD5	accA	Acetyl-coenzyme A carboxyl transferase alpha chain (EC 6.4.1.2)	Inner Membrane	0.0156957	0.0129814	0.0323684	0.0185157	0.0190513	0.0133992	0.00881299	0.0172932	0.0090688	0.000610961	0.000523064	0.00070024	0.000744836	0.000752718	0.00051864	0.000345973	0.000251032	0.000360882	1.09918	0.136432	0.551716	0.522219	-0.937274	0.012457
P06968	dut	Deoxyuridine 5'-triphosphate nucleotidohydrolase (EC 3.6.1.23)	Cytoplasmic	0.0190211	0.0106702	0.0240709	0.0174349	0.0177891	0.0117206	0.0116591		0.0173079	0.000740403	0.000429935	0.000520737	0.000701356	0.00070285	0.000453667	0.000457704		0.000688746	1.09863	0.135711	0.677109	1.01691	0.0241955	0.953894
P0ACC3	erpA	Iron-sulfur cluster insertion protein ErpA	Inner Membrane	0.0180357	0.0187488	0.0230705	0.0234449	0.0132431	0.0176057	0.00738257	0.0199772	0.0106975	0.000702046	0.000755451	0.000499095	0.000943122	0.000523234	0.000681461	0.000289819	0.000289994	0.000425695	1.09773	0.134528	0.687147	0.513908	-0.960418	0.0351836
P0A7T3	rpsP	SSU ribosomal protein S16p	Cytoplasmic	0.0332312	0.0301042	0.065819	0.0139002	0.0480888	0.0476545	0.0266467	0.132145	0.124556	0.00129354	0.00121299	0.00142389	0.000559167	0.00189999	0.00184456	0.00104608	0.00191825	0.00495657	1.09498	0.130899	0.803996	2.01528	1.01098	0.378349
P12758	udp	Uridine phosphorylase (EC 2.4.2.3)	Cytoplasmic	0.019663	0.0105433	0.0416438	0.0119276	0.0269603	0.0192191	0.012947	0.0302874	0.0170516	0.000765388	0.000424822	0.0009009	0.000479813	0.0010652	0.000743914	0.000508261	0.000439659	0.00067855	1.0946	0.130404	0.780417	0.777803	-0.362524	0.401554
P24232	hmp	Flavohemoprotein (Hemoglobin-like protein) (Flavohemoglobin) (Nitric oxide dioxygenase) (EC 1.14.12.17)	Cytoplasmic	0.0023808	0.00196224	0.000510391	0.0017409	0.00120247	0.00213152	0.00467764	0.00384621	0.00228888	9.26735e-05	7.90649e-05	1.10415e-05	7.00316e-05	4.75097e-05	8.25047e-05	0.000183631	5.58325e-05	9.10833e-05	1.09446	0.130224	0.84794	1.80844	0.854747	0.350368
P0ADZ4	rpsO	SSU ribosomal protein S15p (S13e)	Cytoplasmic	0.135848	0.1343	0.268913	0.141964	0.138874	0.177208	0.155356	0.609684	0.122915	0.00528792	0.00541138	0.00581751	0.0057108	0.00548694	0.00685919	0.00609882	0.0088503	0.00489125	1.09325	0.128617	0.353167	1.20122	0.264504	0.444613
P17169	glmS	Glucosamine--fructose-6-phosphate aminotransferase [isomerizing] (EC 2.6.1.16)	Inner Membrane	0.0136408	0.0139839	0.0151093	0.0136004	0.0162604	0.00940479	0.0115813	0.0227986	0.00927575	0.000530972	0.000563456	0.000326867	0.000547104	0.000642451	0.000364031	0.000454651	0.000330949	0.000369117	1.09308	0.128397	0.709815	0.81244	-0.299667	0.362681
P0ADN2	yifE	UPF0438 protein YifE	Inner Membrane	0.0165119	0.00672374	0.0132233	0.0138456	0.00904614	0.010249	0.00986756	0.0295837	0.0128753	0.000642731	0.000270921	0.000286067	0.00055697	0.000357413	0.000396709	0.000387373	0.000429444	0.000512358	1.09283	0.128073	0.802813	1.10791	0.147834	0.761763
P14175	proV	L-proline glycine betaine ABC transport system permease protein ProV (TC 3.A.1.12.1)	Inner Membrane	0.0028893	0.00531293	0.00533912	0.00400233	0.00214238	0.00613057	0.00464435		0.00535101	0.000112467	0.000214075	0.000115504	0.000161003	8.46457e-05	0.000237295	0.000182324		0.000212937	1.09252	0.12766	0.818186	1.34125	0.423573	0.273916
P60716	lipA	Lipoate synthase	Cytoplasmic	0.0430856	0.0774066	0.0449238	0.0556778	0.040878	0.0631541	0.0710664	0.159911	0.0682925	0.00167712	0.00311896	0.000971858	0.00223976	0.00161509	0.0024445	0.00278987	0.0023213	0.00271762	1.09213	0.127148	0.813475	1.35729	0.440732	0.391243
P0AFY8	seqA	Negative modulator of initiation of replication	Inner Membrane	0.00518043	0.0128387	0.0179318	0.0107796	0.011792	0.00792729	0.00918023		0.0133661	0.00020165	0.00051731	0.000387927	0.000433633	0.000465902	0.000306841	0.00036039		0.00053189	1.08988	0.124171	0.769799	1.20917	0.274021	0.585236
P00962	glnS	Glutaminyl-tRNA synthetase (EC 6.1.1.18)	Cytoplasmic	0.0141829	0.0126689	0.0217929	0.0146763	0.0148833	0.0126338	0.0160427	0.0362105	0.0188269	0.000552073	0.000510471	0.000471457	0.000590387	0.000588042	0.000489017	0.00062979	0.00052564	0.000749195	1.08699	0.120341	0.342763	1.24161	0.312208	0.187361
P30850	rnb	Exoribonuclease II (EC 3.1.13.1)	Cytoplasmic	0.00423132	0.00778275	0.0134751	0.00654098	0.00838843	0.00624961	0.00659262	0.0109448	0.0034318	0.000164706	0.000313592	0.000291513	0.000263125	0.000331427	0.000241903	0.000258808	0.000158878	0.000136564	1.08657	0.119786	0.705046	0.719981	-0.473969	0.297771
P0A9D8	dapD	2,3,4,5-tetrahydropyridine-2,6-dicarboxylate N-succinyltransferase (EC 2.3.1.117)	Inner Membrane	0.0393292	0.0184412	0.0317361	0.0267732	0.0288367	0.0257412	0.0254623	0.0228489	0.0167029	0.0015309	0.000743054	0.000686561	0.00107701	0.00113934	0.000996364	0.000999576	0.00033168	0.000664672	1.08519	0.117943	0.788064	0.674183	-0.568789	0.39559
P75823	ltaE	Low-specificity L-threonine aldolase (EC 4.1.2.48)	Cytoplasmic	0.00831452	0.00983689	0.0108874	0.00697979	0.00772678	0.0116368	0.0103003	0.0270603	0.003888	0.000323645	0.00039636	0.000235532	0.000280778	0.000305286	0.000450423	0.000404359	0.000392813	0.000154718	1.08472	0.117317	0.721541	0.996183	-0.00551668	0.990421
P33920	yejK	Nucleoid-associated protein YejK	Cytoplasmic	0.00540063	0.00216966	0.0113416	0.00499719	0.00443704	0.00549358	0.00178056		0.0017971	0.000210221	8.74225e-05	0.000245359	0.000201023	0.000175308	0.00021264	6.98998e-05		7.15134e-05	1.08465	0.117235	0.782114	0.390642	-1.35608	0.14773
P0ACC7	glmU	Glucosamine-1-phosphate N-acetyltransferase (EC 2.3.1.157)	Inner Membrane	0.00756114	0.00892689	0.0132505	0.010384	0.00548598	0.0099405	0.00550006		0.00592378	0.00029432	0.000359693	0.000286654	0.000417721	0.000216751	0.000384766	0.000215917		0.00023573	1.08353	0.115734	0.72396	0.720201	-0.473528	0.0492556
P00864	ppc	Phosphoenolpyruvate carboxylase (EC 4.1.1.31)	Inner Membrane	0.0106541	0.00615187	0.013933	0.0117286	0.00525039	0.00943145	0.0114002	0.0301172	0.0148785	0.000414716	0.000247879	0.000301419	0.000471809	0.000207443	0.000365062	0.000447541	0.000437188	0.000592071	1.0833	0.115433	0.786105	1.53193	0.61535	0.0714254
P0ADG7	guaB	Inosine-5'-monophosphate dehydrogenase (EC 1.1.1.205)	Inner Membrane	0.027049	0.012495	0.0294969	0.0148856	0.0201381	0.0253776	0.0145105	0.0632075	0.0112421	0.00105289	0.000503463	0.000638119	0.000598805	0.000795658	0.000982288	0.000569639	0.000917534	0.000447367	1.08306	0.115115	0.777411	0.881551	-0.181885	0.710809
P0AFG6	sucB	Dihydrolipoamide succinyltransferase component (E2) of 2-oxoglutarate dehydrogenase complex (EC 2.3.1.61)	Inner Membrane	0.179666	0.164187	0.264929	0.19071	0.176626	0.162652	0.112969	0.308425	0.15889	0.00699355	0.00661561	0.00573132	0.00767175	0.0069785	0.00629576	0.00443483	0.00447717	0.00632284	1.08301	0.115052	0.382365	0.787717	-0.34425	0.148122
P0A7J3	rplJ	LSU ribosomal protein L10p (P0)	Cytoplasmic	0.200936	0.173484	0.271641	0.14595	0.221804	0.20039	0.221263	0.61456	0.23954	0.00782152	0.00699025	0.00587653	0.00587116	0.00876347	0.00775648	0.00868614	0.0089211	0.0095322	1.08231	0.114111	0.61099	1.31183	0.391576	0.0452121
P0AES4	gyrA	DNA gyrase subunit A (EC 5.99.1.3)	Inner Membrane	0.0249953	0.0374823	0.0597826	0.0394063	0.0284051	0.0353481	0.0273522	0.071912	0.030189	0.000972951	0.00151028	0.0012933	0.00158521	0.00112229	0.00136822	0.00107377	0.00104389	0.00120133	1.07922	0.109987	0.653458	0.878846	-0.186318	0.435259
P31808	yciK	Uncharacterized oxidoreductase YciK (EC 1.-.-.-)	Cytoplasmic	0.00126902	0.000219472	0.000638775	0.000473648	0.000828579		0.000626041		0.000925091	4.93972e-05	8.84323e-06	1.38189e-05	1.90535e-05	3.27372e-05		2.45766e-05		3.68129e-05	1.07809	0.108471	0.905597	1.27789	0.353768	0.672373
P0AF12	mtnN	5'-methylthioadenosine nucleosidase (EC 3.2.2.16)	Cytoplasmic	0.0131602	0.0141689	0.0174518	0.0131542	0.0101049	0.0166518	0.0191359	0.0217422	0.00590064	0.000512266	0.000570912	0.000377543	0.000529157	0.000399246	0.000644541	0.00075122	0.000315615	0.000234809	1.07683	0.106787	0.703231	0.891097	-0.166346	0.779598
P37440	ucpA	3-oxoacyl-[acyl-carrier protein] reductase (EC 1.1.1.100)	Cytoplasmic	0.0125718	0.0142339	0.0219926	0.0187373	0.0122694	0.0106788	0.0193132	0.044407	0.00742881	0.000489363	0.000573529	0.000475777	0.000753751	0.000484765	0.000413343	0.000758182	0.000644622	0.000295621	1.07356	0.102408	0.755863	1.10383	0.142515	0.741697
P0AA25	trxA	Thioredoxin-1 (Trx-1)	Inner Membrane	0.0850605	0.0477176	0.0705641	0.0598814	0.0835496	0.0398478	0.0645605	0.186909	0.0333198	0.00331101	0.0019227	0.00152654	0.00240886	0.00330105	0.00154239	0.00253446	0.00271322	0.00132592	1.07278	0.101361	0.83591	0.97239	-0.0403925	0.933125
P08839	ptsI	Phosphoenolpyruvate-protein phosphotransferase of PTS system (EC 2.7.3.9)	Inner Membrane	0.0369847	0.0413422	0.099774	0.0550162	0.0529257	0.0345392	0.0590588	0.121736	0.0385232	0.00143964	0.00166581	0.00215846	0.00221315	0.0020911	0.0013369	0.00231848	0.00176715	0.00153298	1.07167	0.0998554	0.736179	1.06739	0.0940816	0.726628
P0A717	prs	Ribose-phosphate pyrophosphokinase (EC 2.7.6.1)	Inner Membrane	0.0393732	0.0497612	0.0665185	0.0542747	0.042272	0.0381469	0.0500495	0.136494	0.0267883	0.00153262	0.00200504	0.00143902	0.00218332	0.00167017	0.00147655	0.0019648	0.00198137	0.00106601	1.071	0.0989629	0.690271	1.00713	0.0102554	0.974985
P62768	yaeH	UPF0325 protein YaeH	Inner Membrane	0.0390169	0.0409001	0.0699196	0.0509681	0.0394823	0.0360234	0.0317052	0.0403265	0.0274754	0.00151875	0.001648	0.0015126	0.0020503	0.00155995	0.00139435	0.00124466	0.000585389	0.00109335	1.06951	0.0969496	0.640546	0.624745	-0.678661	0.0927306
P62399	rplE	LSU ribosomal protein L5p (L11e)	Cytoplasmic	0.126275	0.0928263	0.151765	0.129761	0.0909449	0.101496	0.142293	0.523937	0.128162	0.00491529	0.00374027	0.0032832	0.00521994	0.00359324	0.00392861	0.00558604	0.00760559	0.00510006	1.06726	0.0939144	0.719514	1.53213	0.615535	0.0920664
P0A9X9	cspA	Cold shock protein CspA	Cytoplasmic	0.0653177	0.0713963	0.155298	0.0687428	0.0933951	0.0750681	0.0881735	0.236368	0.0552698	0.00254251	0.00287678	0.00335964	0.00276533	0.00369005	0.00290565	0.00346144	0.00343117	0.0021994	1.06631	0.0926218	0.631224	1.03566	0.0505533	0.840661
P22188	murE	UDP-N-acetylmuramoylalanyl-D-glutamate--2,6-diaminopimelate ligase (EC 6.3.2.13)	Cytoplasmic	0.00184722	0.000707061		0.000679156	0.00189779	0.00150492	0.000403619		0.00137374	7.19038e-05	2.84897e-05		2.73206e-05	7.49817e-05	5.82508e-05	1.58449e-05		5.46665e-05	1.06616	0.0924214	0.910279	0.70235	-0.509737	0.659502
P0AAZ7	ycaR	UPF0434 protein YcaR	Cytoplasmic	0.00714266	0.00502472	0.0116364	0.00532848	0.00631674	0.00813942	0.00629128	0.0096798	0.00908151	0.000278031	0.000202462	0.000251735	0.00021435	0.000249575	0.000315052	0.000246978	0.000140514	0.000361388	1.06384	0.0892879	0.696053	1.02274	0.0324418	0.940654
P41409	rihA	Inosine-uridine preferring nucleoside hydrolase (EC 3.2.2.1)	Cytoplasmic	0.00294885	0.00217662	0.00409414	0.000676785	0.00528979	0.00189071				0.000114785	8.77028e-05	8.85704e-05	2.72252e-05	0.000209	7.31834e-05				1.06305	0.088205	0.921555	OFF	OFF
P04425	gshB	Glutathione synthetase (EC 6.3.2.3)	Cytoplasmic	0.014667	0.0116122	0.0259536	0.0136026	0.0166516	0.0127814	0.0175569	0.0315303	0.0108033	0.000570917	0.000467893	0.000561465	0.000547197	0.000657904	0.000494728	0.000689235	0.000457701	0.000429905	1.06221	0.0870691	0.603175	0.985356	-0.0212836	0.935984
P04983	rbsA	Ribose ABC transport system, ATP-binding protein RbsA (TC 3.A.1.2.1)	Inner Membrane		0.00249557	0.00351257	0.00212909	0.00383965	0.00108752					0.000100555	7.59891e-05	8.56476e-05	0.000151705	4.20947e-05				1.05525	0.077587	0.897036
P0AFU8	ribC	Riboflavin synthase eubacterial/eukaryotic (EC 2.5.1.9)	Cytoplasmic	0.00853859	0.00664898	0.00690015	0.00828635	0.00561634	0.00608337	0.00825213	0.0459707	0.00314831	0.000332368	0.000267909	0.000149274	0.000333337	0.000221902	0.000235468	0.000323955	0.000667321	0.000125283	1.05491	0.0771188	0.842545	1.48964	0.574963	0.527836
P0AED5	uvrY	Response regulator UvrY	Cytoplasmic	0.0016213	0.00142433	0.00285836	0.00275953	0.00161342	0.000449471	0.0012732		0.000552637	6.31097e-05	5.7391e-05	6.18361e-05	0.000111008	6.37465e-05	1.73977e-05	4.99824e-05		2.19915e-05	1.05383	0.0756452	0.914793	0.592096	-0.756097	0.323637
P0A6N4	efp	Translation elongation factor P	Cytoplasmic	0.0315651	0.0239653	0.0443977	0.0308097	0.0354046	0.017705	0.0320217	0.051529	0.0297979	0.00122868	0.000965637	0.000960475	0.00123939	0.00139884	0.000685306	0.00125708	0.000748007	0.00118577	1.05349	0.0751702	0.827155	1.01143	0.0163999	0.95136
P0AFJ1	phnA	Alkylphosphonate utilization operon protein PhnA	Cytoplasmic	0.00406694	0.00184295	0.00511948	0.00318132	0.00271881	0.00324016				0.000158307	7.42583e-05	0.000110752	0.000127976	0.00010742	0.000125417				1.05096	0.0717068	0.835981	OFF	OFF
P0A7L0	rplA	LSU ribosomal protein L1p (L10Ae)	Cytoplasmic	0.255114	0.356638	0.296598	0.308358	0.183306	0.32619	0.326485	0.938447	0.182375	0.00993041	0.0143701	0.00641645	0.0124044	0.00724243	0.0126258	0.0128169	0.0136227	0.00725738	1.05065	0.0712778	0.867173	1.09702	0.133585	0.76125
P0AEM4	flgM	Negative regulator of flagellin synthesis FlgM	Cytoplasmic	0.00491682	0.00448006	0.0050483	0.00558884	0.00426619	0.00287493	0.00369631		0.00155989	0.000191389	0.000180516	0.000109212	0.000224823	0.000168557	0.00011128	0.000145107		6.20738e-05	1.04893	0.0689247	0.860356	0.645935	-0.630539	0.37709
P29217	yceH	UPF0502 protein YceH (G20.3)	Cytoplasmic	0.00574459	0.00400594	0.0172359	0.00745395	0.00570476	0.00695952	0.00486629	0.0200087	0.00723889	0.00022361	0.000161412	0.000372872	0.000299852	0.000225395	0.000269381	0.000191037	0.00029045	0.000288063	1.04847	0.068284	0.867695	1.01538	0.0220192	0.959657
P0A6A6	leuC	3-isopropylmalate dehydratase large subunit (EC 4.2.1.33)	Cytoplasmic	0.00117898	0.00149781	0.00170641		0.00108926	0.00147253	0.0024304	0.00667544	0.00152398	4.58921e-05	6.03516e-05	3.69155e-05		4.30368e-05	5.69972e-05	9.54105e-05	9.69022e-05	6.06452e-05	1.04814	0.0678329	0.83111	1.76697	0.821277	0.0702902
P0A7R9	rpsK	SSU ribosomal protein S11p (S14e)	Cytoplasmic	0.180127	0.19783	0.271978	0.183778	0.137031	0.23306	0.173063	0.522872	0.157105	0.00701149	0.00797121	0.00588383	0.00739287	0.0054141	0.00902103	0.00679395	0.00759013	0.00625179	1.04608	0.0649896	0.806435	0.988945	-0.0160372	0.920659
P23893	hemL	Glutamate-1-semialdehyde 2,1-aminomutase (GSA) (EC 5.4.3.8) (Glutamate-1-semialdehyde aminotransferase) (GSA-AT)	Inner Membrane	0.0182649	0.0174727	0.0312872	0.0224228	0.0171678	0.0156453	0.0142529	0.157839	0.0110201	0.00071097	0.000704029	0.00067685	0.000902006	0.000678302	0.000605582	0.00055953	0.00229123	0.000438531	1.04496	0.0634423	0.759572	1.57243	0.652999	0.57344
P30177	ybiB	Uncharacterized protein YbiB	Cytoplasmic	0.00821226	0.00594421	0.012419	0.0104821	0.00649639	0.00479184	0.00669595	0.0264029	0.00282175	0.000319665	0.000239511	0.000268665	0.000421664	0.000256673	0.000185477	0.000262864	0.00038327	0.000112288	1.04345	0.0613659	0.883356	0.916145	-0.126353	0.800274
P0A9M8	pta	Phosphate acetyltransferase (EC 2.3.1.8)	Periplasmic	0.0210188	0.0434319	0.098519	0.0436818	0.0439522	0.0363429	0.0453143	0.0898388	0.0409848	0.000818165	0.00175001	0.00213131	0.0017572	0.00173655	0.00140672	0.00177891	0.00130412	0.00163094	1.04277	0.0604193	0.882189	1.00308	0.00444225	0.991563
P0AF70	yjeI	Uncharacterized protein YjeI	Outer Membrane	0.00835731	0.0112674	0.0188535		0.00724222	0.0139047	0.00525663		0.0111486	0.000325311	0.000454001	0.000407866		0.000286141	0.00053821	0.00020636		0.000443645	1.04157	0.0587548	0.918318	0.821282	-0.284051	0.657451
P0AG86	secB	Protein-export protein SecB	Inner Membrane	0.0733452	0.116157	0.211345	0.0955419	0.109049	0.115096	0.098157	0.14751	0.146402	0.00285499	0.00468034	0.00457211	0.00384339	0.00430853	0.00445502	0.00385337	0.00214129	0.00582589	1.04126	0.0583239	0.809565	0.976305	-0.0345967	0.942162
P0A7Z0	rpiA	Ribose 5-phosphate isomerase A (EC 5.3.1.6)	Cytoplasmic	0.0188712	0.0168006	0.0283455	0.0249228	0.015759	0.0124131	0.0245646	0.0170469	0.0170284	0.000734567	0.000676952	0.000613211	0.00100257	0.000622639	0.000480473	0.000964337	0.000247456	0.000677627	1.03998	0.0565607	0.880107	0.933172	-0.0997858	0.849775
P0ABU2	ychF	GTP-binding and nucleic acid-binding protein YchF	Cytoplasmic	0.0134148	0.0199262	0.0421598	0.018046	0.022859	0.017813	0.0239274	0.0526925	0.0206159	0.000522177	0.000802889	0.000912062	0.000725941	0.000903162	0.000689486	0.000939322	0.000764896	0.000820384	1.03641	0.0515995	0.85126	1.1285	0.174408	0.5098
P0AD33	yfcZ	UPF0381 protein YfcZ	Cytoplasmic	0.0152555	0.0191794	0.0259175	0.0182405	0.0161367	0.016122	0.0194577	0.0156181	0.0109305	0.000593827	0.000772798	0.000560685	0.000733763	0.000637564	0.000624033	0.000763854	0.000226715	0.000434965	1.03531	0.0500603	0.780206	0.73965	-0.435086	0.404452
P29012	dadX	Alanine racemase (EC 5.1.1.1)	Inner Membrane	0.00863804	0.00743824	0.00969819	0.0107271	0.0061328	0.00519899	0.00518784	0.0120398	0.00380436	0.000336239	0.000299711	0.000209805	0.000431521	0.000242307	0.000201237	0.00020366	0.000174772	0.00015139	1.03466	0.0491518	0.910701	0.626449	-0.674732	0.0918912
P39199	prmB	Protein-N(5)-glutamine methyltransferase PrmB, methylates LSU ribosomal protein L3p	Cytoplasmic	0.00286558	0.00208725	0.0105441	0.00446995	0.00206732	0.00456557	0.00460359		0.00449085	0.000111544	8.41021e-05	0.000228105	0.000179814	8.16799e-05	0.000176719	0.000180724		0.000178708	1.03413	0.0484151	0.934318	1.27232	0.347464	0.475448
P15977	malQ	4-alpha-glucanotransferase (amylomaltase) (EC 2.4.1.25)	Inner Membrane	0.00325494	0.00303231	0.00943859	0.00414644	0.00469135	0.00298791	0.0028817	0.00564342	0.00314489	0.0001267	0.000122181	0.000204189	0.0001668	0.000185355	0.000115653	0.000113127	8.19211e-05	0.000125147	1.03253	0.0461812	0.891868	0.706723	-0.500783	0.234468
P0A9L5	ppiC	Peptidyl-prolyl cis-trans isomerase C (PPIase C) (EC 5.2.1.8) (Par10) (Parvulin) (Rotamase C)	Cytoplasmic	0.00495484	0.00245548	0.00169713	0.00261942	0.00272447	0.00325593	0.00226901	0.0223928	0.000879431	0.000192869	9.8939e-05	3.67147e-05	0.000105372	0.000107644	0.000126027	8.90749e-05	0.00032506	3.49959e-05	1.03202	0.0454753	0.945756	1.36712	0.451142	0.714691
P0ABF6	cdd	Cytidine deaminase (EC 3.5.4.5)	Cytoplasmic	0.00208511	0.00286198	0.00669611	0.0039798	0.00326069	0.00162062	0.00589039	0.00347599	0.00111056	8.11638e-05	0.000115318	0.00014486	0.000160096	0.00012883	6.27291e-05	0.00023124	5.04583e-05	4.41933e-05	1.03021	0.0429438	0.925333	0.954735	-0.0668271	0.942215
P0A7S9	rpsM	SSU ribosomal protein S13p (S18e)	Cytoplasmic	0.187767	0.0961295	0.164727	0.0988364	0.127733	0.158755	0.115829	0.685361	0.109884	0.00730888	0.00387336	0.00356362	0.00397591	0.00504674	0.00614493	0.00454714	0.00994886	0.00437269	1.0286	0.0406806	0.923817	1.27959	0.355684	0.569194
P0A9B6	epd	D-erythrose-4-phosphate dehydrogenase (EC 1.2.1.72)	Cytoplasmic	0.00218334	0.0011682	0.00276961	0.00174463	0.0015498	0.00170447	0.0015052		0.00125936	8.49874e-05	4.70706e-05	5.99162e-05	7.01814e-05	6.12327e-05	6.59749e-05	5.90898e-05		5.01148e-05	1.02821	0.0401292	0.887764	0.853276	-0.228916	0.499826
P07012	prfB	programmed frameshift-containing	Cytoplasmic	0.0176903	0.0300996	0.0473361	0.0298917	0.0245167	0.0215257	0.0244717	0.108671	0.026649	0.000688603	0.00121281	0.00102404	0.00120246	0.000968656	0.000833194	0.00096069	0.00157749	0.00106046	1.02695	0.0383724	0.895979	1.23012	0.298794	0.413853
P77808	yfaY	N-terminal domain of CinA protein, COG1058	Cytoplasmic	0.00437163	0.00246057	0.00758471	0.00313084	0.00470022	0.00341698	0.00228773		0.00191941	0.000170167	9.91441e-05	0.000164083	0.000125945	0.000185706	0.000132261	8.98097e-05		7.63808e-05	1.02427	0.0345903	0.911596	0.575193	-0.797881	0.104944
P12281	moeA	Molybdopterin biosynthesis protein MoeA	Cytoplasmic	0.00266802	0.00627392	0.00879643	0.00518317	0.00574959	0.00320262	0.00420413	0.0091576	0.00446863	0.000103854	0.000252796	0.000190297	0.000208505	0.000227167	0.000123964	0.000165042	0.000132934	0.000177824	1.0232	0.0330854	0.941213	0.86992	-0.201046	0.644655
P0A9D4	cysE	Serine acetyltransferase (EC 2.3.1.30)	Cytoplasmic	0.00257498	0.00300957	0.0036503	0.00306843	0.00218076	0.00250819	0.00203909	0.0138378	0.000725935	0.000100232	0.000121265	7.89685e-05	0.000123434	8.61621e-05	9.70845e-05	8.00488e-05	0.000200873	2.88877e-05	1.02069	0.0295388	0.906057	1.0311	0.0441791	0.957535
P0A6T1	pgi	Glucose-6-phosphate isomerase (EC 5.3.1.9)	Cytoplasmic	0.0132861	0.00915518	0.0337765	0.00755019	0.0165797	0.0178348	0.00633479	0.0331822	0.0185028	0.000517168	0.000368892	0.000730702	0.000303723	0.000655066	0.000690331	0.000248686	0.000481681	0.000736297	1.02001	0.0285893	0.950201	0.907161	-0.140569	0.790995
P0A722	lpxA	Acyl-[acyl-carrier-protein]--UDP-N-acetylglucosamine O-acyltransferase (EC 2.3.1.129)	Cytoplasmic	0.00615226		0.00481303		0.00746769	0.0014299		0.0830907	0.000705165	0.000239479		0.000104122		0.000295049	5.53469e-05		0.00120616	2.80612e-05	1.01977	0.0282505	0.98306	3.59202	1.8448	0.587275
P0AFF6	nusA	Transcription termination protein NusA	Cytoplasmic	0.0347169	0.0493946	0.1415	0.0648354	0.0524186	0.0476844	0.0588645	0.116968	0.0419532	0.00135137	0.00199027	0.00306113	0.00260815	0.00207106	0.00184572	0.00231085	0.00169793	0.00166948	1.01908	0.0272661	0.945738	0.886845	-0.173246	0.68879
P0A7D4	purA	Adenylosuccinate synthetase (EC 6.3.4.4)	Inner Membrane	0.0576724	0.0524064	0.113468	0.048248	0.0665039	0.0611785	0.0642746	0.216062	0.0556956	0.00224492	0.00211162	0.00245471	0.00194088	0.00262757	0.00236803	0.00252324	0.0031364	0.00221634	1.01839	0.0262858	0.864111	1.15632	0.20954	0.320212
P0A879	trpB	Tryptophan synthase beta chain (EC 4.2.1.20)	Cytoplasmic	0.00298096	0.00364765	0.00555467	0.00263146	0.00436536	0.00286617	0.00714015	0.00742075		0.000116035	0.000146976	0.000120167	0.000105856	0.000172476	0.000110941	0.000280302	0.000107721		1.01591	0.0227689	0.936942	1.51897	0.603095	0.58235
P21170	speA	Biosynthetic arginine decarboxylase (EC 4.1.1.19)	Periplasmic	0.0217349	0.026343	0.0252455	0.0271328	0.0153915	0.0204104	0.0229229	0.0296152	0.0184133	0.000846038	0.00106144	0.000546148	0.00109148	0.000608118	0.000790023	0.00089989	0.000429901	0.000732737	1.01467	0.0210068	0.956239	0.840603	-0.250504	0.556085
P37760	rfbD	dTDP-4-dehydrorhamnose reductase (EC 1.1.1.133)	Cytoplasmic	0.00335873	0.00319821	0.0013059	0.00292979	0.00230879	0.00213933	0.00341754		0.00361342	0.00013074	0.000128866	2.82511e-05	0.000117857	9.12205e-05	8.28069e-05	0.000134163		0.000143792	1.01399	0.0200454	0.972739	1.4484	0.53446	0.33113
P15288	pepD	Aminoacyl-histidine dipeptidase (Peptidase D) (EC 3.4.13.3)	Cytoplasmic	0.0262246	0.0313585	0.0568098	0.0479634	0.0216609	0.0197559	0.0392274	0.147465	0.0499202	0.0010208	0.00126353	0.00122899	0.00192943	0.000855822	0.000764688	0.00153996	0.00214064	0.00198651	1.01042	0.0149589	0.97719	1.61303	0.689774	0.0418968
P00963	asnA	Aspartate--ammonia ligase (EC 6.3.1.1)	Cytoplasmic	0.0147009	0.0182537	0.0229497	0.0122667	0.021375	0.0124176	0.0156957	0.0658609	0.0112506	0.000572237	0.000735499	0.000496482	0.000493457	0.000844528	0.000480646	0.000616169	0.000956052	0.000447703	1.00799	0.0114794	0.974354	1.11956	0.162928	0.694417
P45577	proQ	ProQ: influences osmotic activation of compatible solute ProP	Inner Membrane	0.0180541	0.0108855	0.0580145	0.0152054	0.0256529	0.0204083	0.0169786	0.0287829	0.0242801	0.000702761	0.000438612	0.00125505	0.000611672	0.00101355	0.000789942	0.000666531	0.000417819	0.000966197	1.00782	0.0112347	0.982872	0.855668	-0.224876	0.712436
P06974	fliM	Flagellar motor switch protein FliM	Inner Membrane	0.00150943	0.00417997	0.0138225		0.00380864	0.00524426	0.0049528		0.00265585	5.87551e-05	0.000168424	0.000299027		0.00015048	0.000202989	0.000194433		0.000105686	1.0076	0.0109162	0.987012	0.855517	-0.225132	0.778729
P0A6U3	mnmG	tRNA uridine 5-carboxymethylaminomethyl modification enzyme MnmG (Glucose-inhibited division protein A)	Inner Membrane	0.00133618	0.00278515	0.00491762	0.00332439	0.00171605	0.00182964	0.00259843		0.00208992	5.20112e-05	0.000112223	0.000106385	0.000133731	6.78011e-05	7.08196e-05	0.000102007		8.31657e-05	1.0064	0.00920846	0.984971	1.02639	0.0375721	0.918883
P16659	proS	Proline--tRNA ligase (EC 6.1.1.15) (Global RNA synthesis factor) (Prolyl-tRNA synthetase) (ProRS)	Inner Membrane	0.0279704	0.0258092	0.0573336	0.0293256	0.0305971	0.0257251	0.018537	0.118131	0.0326385	0.00108876	0.00103994	0.00124032	0.00117969	0.00120889	0.000995738	0.00072771	0.00171481	0.00129881	1.00454	0.0065366	0.957533	1.11051	0.151223	0.709557
P0A9B2	gapA	NAD-dependent glyceraldehyde-3-phosphate dehydrogenase (EC 1.2.1.12)	Inner Membrane	0.213362	0.210935	0.465571	0.239644	0.249237	0.193304	0.270812	0.838838	0.2425	0.00830521	0.00849926	0.0100719	0.0096402	0.00984737	0.00748219	0.0106313	0.0121768	0.00964998	1.00347	0.00500384	0.975316	1.20768	0.272238	0.119337
Q46856	yqhD	Alcohol dehydrogenase YqhD (EC 1.1.1.-)	Inner Membrane	0.00436881	0.00310061	0.00238258	0.00195841	0.00439006	0.00246328	0.00280774	0.0169811	0.0055306	0.000170057	0.000124933	5.15435e-05	7.87815e-05	0.000173452	9.5346e-05	0.000110224	0.000246502	0.000220084	1.00301	0.00434278	0.994234	1.66451	0.735097	0.231765
P08312	pheS	Phenylalanyl-tRNA synthetase alpha chain (EC 6.1.1.20)	Inner Membrane	0.0194135	0.0235852	0.051794	0.028009	0.0187285	0.0249612	0.0285021	0.0449832	0.0157464	0.000755676	0.000950325	0.00112048	0.00112672	0.000739963	0.000966173	0.00111891	0.000652987	0.000626609	1.00226	0.00325017	0.989649	0.848583	-0.236872	0.503654
P09373	pflB	Pyruvate formate-lyase (EC 2.3.1.54)	Inner Membrane	0.084783	0.0848616	0.12452	0.0853038	0.0730562	0.0803735	0.0794372	0.312796	0.0833768	0.00330021	0.00341935	0.00269379	0.00343153	0.00288645	0.00311101	0.00311848	0.00454062	0.00331788	1.00166	0.00239791	0.98585	1.16611	0.221702	0.373213
P0A7K6	rplS	LSU ribosomal protein L19p	Cytoplasmic	0.122477	0.152966	0.22437	0.148027	0.0970343	0.154539	0.146107	0.339575	0.151068	0.00476748	0.0061635	0.00485389	0.00595472	0.00383383	0.00598174	0.00573574	0.00492935	0.00601157	0.999076	-0.00133305	0.995722	1.0565	0.0792872	0.624073
P0C0V0	degP	HtrA protease/chaperone protein	Periplasmic	0.00939525	0.0171978	0.0297062	0.0178656	0.0103894	0.0146622	0.0135701	0.0149246	0.00644499	0.000365713	0.000692956	0.000642647	0.000718682	0.000410486	0.000567531	0.000532722	0.00021665	0.000256471	0.997286	-0.00392118	0.991468	0.591214	-0.758247	0.178481
P37646	yhjH	GGDEF/EAL domain protein YhjH	Cytoplasmic	0.0024503	0.00349139	0.00664942	0.00442621	0.0018809					9.53786e-05	0.000140679	0.00014385	0.000178054	7.43143e-05					0.996433	-0.00515583	0.994525	OFF	OFF
P0A6F3	glpK	Glycerol kinase (EC 2.7.1.30)	Inner Membrane	0.235231	0.219053	0.486948	0.198864	0.281585	0.237435	0.246891	0.434255	0.29075	0.00915644	0.00882635	0.0105344	0.00799975	0.0111254	0.00919039	0.00969224	0.00630374	0.01157	0.992931	-0.0102344	0.95279	0.966647	-0.0489396	0.860498
P0ACY1	ydjA	Putative NAD(P)H nitroreductase YdjA (EC 1.-.-.-)	Cytoplasmic	0.0274184	0.0264342	0.045137	0.0214177	0.0347115	0.0220195	0.0131079	0.0538345	0.0164857	0.00106727	0.00106512	0.00097647	0.000861573	0.00137145	0.000852309	0.000514577	0.000781474	0.000656028	0.992433	-0.0109588	0.96796	0.627908	-0.671374	0.0256067
P21165	pepQ	Xaa-Pro dipeptidase PepQ (EC 3.4.13.9)	Cytoplasmic	0.0135982	0.0177469	0.0247238	0.0178129	0.0128789	0.0139589	0.0169823	0.0371765	0.0148149	0.000529315	0.000715079	0.00053486	0.000716563	0.000508847	0.000540308	0.000666677	0.000539663	0.000589543	0.992392	-0.0110184	0.961955	1.00935	0.0134201	0.942549
P27302	tktA	Transketolase (EC 2.2.1.1)	Inner Membrane	0.09895	0.0825024	0.144415	0.108041	0.0774409	0.0724734	0.0829371	0.158095	0.0735989	0.00385167	0.00332429	0.00312418	0.0043462	0.0030597	0.00280522	0.00325588	0.00229494	0.00292878	0.991358	-0.0125226	0.958643	0.823251	-0.280596	0.168034
P0A8F4	udk	Uridine kinase (EC 2.7.1.48) [C1]	Cytoplasmic	0.000983511	0.00214231	0.00333877	0.000463983	0.00273569	0.00176131	0.00343714		0.00196275	3.82835e-05	8.63204e-05	7.22292e-05	1.86648e-05	0.000108087	6.81751e-05	0.000134932		7.81054e-05	0.990317	-0.0140374	0.984143	1.62349	0.699099	0.359925
P0A964	cheW	Positive regulator of CheA protein activity (CheW)	Cytoplasmic	0.0682329	0.100683	0.154187	0.0787926	0.0668346	0.106965	0.0812633	0.319952	0.0566323	0.00265599	0.00405685	0.00333561	0.00316961	0.00264064	0.00414028	0.00319017	0.0046445	0.00225361	0.990255	-0.0141286	0.959035	1.00396	0.00570653	0.987808
P0A7R1	rplI	LSU ribosomal protein L9p	Cytoplasmic	0.162862	0.155859	0.16555	0.137561	0.114053	0.154999	0.131986	0.461422	0.181174	0.00633945	0.00628007	0.00358142	0.00553369	0.00450622	0.00599952	0.00518138	0.00669811	0.00720958	0.990031	-0.0144543	0.960994	1.17827	0.23667	0.43547
P37749	wbbI	Beta-1,6-galactofuranosyltransferase WbbI (EC 2.4.1.-) (D-Galf:alpha-D-Glc beta-1,6-galactofuranosyltransferase) (GalF transferase)	Inner Membrane	0.00173613	0.00566708	0.0106961	0.00453144	0.00336846	0.00532786	0.00278625	0.0222953	0.00281888	6.75794e-05	0.000228345	0.000231393	0.000182287	0.000133088	0.000206225	0.00010938	0.000323643	0.000112174	0.989158	-0.0157274	0.976223	1.03391	0.0481076	0.950165
P77718	thiI	Rhodanese-like domain required for thiamine synthesis	Cytoplasmic	0.00208817	0.00426089	0.00633344	0.00396357	0.00293725	0.00283841	0.00410299	0.00347043	0.0031944	8.12826e-05	0.000171685	0.000137014	0.000159443	0.000116051	0.000109866	0.000161072	5.03776e-05	0.000127117	0.98815	-0.017198	0.962793	0.86816	-0.203967	0.705142
P0A6F9	groS	Heat shock protein 60 family co-chaperone GroES	Inner Membrane	0.116678	0.0977698	0.221444	0.085977	0.0885655	0.158929	0.151387	0.366531	0.138415	0.00454175	0.00393946	0.00479059	0.00345862	0.00349923	0.00615165	0.00594302	0.00532064	0.00550804	0.987771	-0.0177518	0.958068	1.26371	0.337665	0.0237737
P27434	rodZ	Cytoskeleton protein RodZ	Cytoplasmic		0.00294922	0.0090969	0.00421064	0.00633689	0.00123132	0.019103		0.00330938		0.000118833	0.000196797	0.000169382	0.000250371	4.76607e-05	0.000749928		0.000131693	0.98726	-0.0184986	0.979086	2.7932	1.48192	0.52678
P0ABP8	deoD	Purine nucleoside phosphorylase (EC 2.4.2.1)	Inner Membrane	0.0425138	0.0334018	0.0628213	0.0328743	0.0488522	0.0271652	0.0286304	0.120089	0.0344554	0.00165487	0.00134586	0.00135904	0.00132244	0.00193015	0.00105148	0.00112395	0.00174323	0.00137111	0.987225	-0.0185489	0.951687	0.972137	-0.0407691	0.856415
P37330	glcB	Malate synthase G (EC 2.3.3.9)	Cytoplasmic	0.0710121	0.0450489	0.084899	0.0598066	0.0630368	0.0366305	0.0393032	0.137342	0.0438823	0.00276417	0.00181516	0.00183666	0.00240585	0.00249059	0.00141786	0.00154293	0.00199369	0.00174624	0.984149	-0.0230514	0.945437	0.82339	-0.280352	0.355094
P24215	uxuA	Mannonate dehydratase (EC 4.2.1.8)	Cytoplasmic	0.0201469	0.0173878	0.0205452	0.0211952	0.0154724	0.0111812	0.0216975	0.0523846	0.016912	0.000784224	0.00070061	0.000444464	0.000852623	0.000611317	0.000432789	0.000851783	0.000760426	0.000672993	0.983119	-0.0245626	0.948896	1.18447	0.244245	0.377329
P0ADR6	rlmM	Ribosomal RNA large subunit methyltransferase M (EC 2.1.1.186) (23S rRNA (cytidine2498-2'-O)-methyltransferase) (23S rRNA 2'-O-ribose methyltransferase RlmM)	Cytoplasmic	0.00230572	0.000411545	0.00348617	0.00204894	0.00197968	0.00046126				8.97509e-05	1.65825e-05	7.54179e-05	8.24234e-05	7.82172e-05	1.78539e-05				0.982081	-0.0260868	0.973404	OFF	OFF
P61517	can	Carbonic anhydrase (EC 4.2.1.1)	Cytoplasmic	0.0118084	0.00875628	0.0138964	0.00877497	0.0098155	0.00902069	0.00624068	0.0183086	0.00747149	0.000459648	0.000352818	0.000300628	0.000352993	0.000387811	0.000349163	0.000244992	0.000265772	0.000297319	0.979223	-0.0302911	0.886462	0.725979	-0.462	0.15233
P37751	wbbK	Putative glycosyltransferase WbbK	Inner Membrane		0.00181829	0.00546989		0.00250262	0.00227891					7.32645e-05	0.000118333		9.88789e-05	8.82094e-05				0.976467	-0.0343572	0.936975
P23839	yicC	UPF0701 protein YicC	Cytoplasmic	0.00602402	0.00832982	0.0140991	0.00611662	0.00732844	0.00821889	0.00915751	0.0236044	0.00535325	0.000234487	0.000335635	0.000305013	0.000246055	0.000289547	0.000318128	0.000359498	0.000342646	0.000213026	0.975541	-0.0357258	0.855795	1.04575	0.0645346	0.822473
P0A953	fabB	3-oxoacyl-[acyl-carrier-protein] synthase, KASI (EC 2.3.1.41)	Inner Membrane	0.0546322	0.0398435	0.0727466	0.046613	0.047148	0.0366836	0.0791108	0.169759	0.0419	0.00212658	0.00160542	0.00157376	0.00187511	0.00186282	0.00141991	0.00310566	0.00246426	0.00166736	0.972121	-0.0407918	0.843421	1.36404	0.447889	0.259166
P0A6S7	gpsA	Glycerol-3-phosphate dehydrogenase [NAD(P)+] (EC 1.1.1.94)	Cytoplasmic	0.00673619	0.00463098	0.00689174	0.00410129	0.00796486	0.00259559	0.00831305	0.0232859	0.00353827	0.000262209	0.000186597	0.000149092	0.000164983	0.000314692	0.000100467	0.000326347	0.000338023	0.000140801	0.970304	-0.0434911	0.939329	1.34667	0.429396	0.407976
P32132	typA	GTP-binding protein TypA/BipA	Inner Membrane	0.0267399	0.0416476	0.0838439	0.0402832	0.0469465	0.0236361	0.0365949	0.0385872	0.0395361	0.00104086	0.00167812	0.00181383	0.00162048	0.00185486	0.000914882	0.00143661	0.00056014	0.00157329	0.968543	-0.0461125	0.904039	0.787601	-0.344463	0.467387
P17952	murC	UDP-N-acetylmuramate--alanine ligase (EC 6.3.2.8)	Inner Membrane		0.00352398	0.00082684	0.00360013	0.00130064	0.000921813	0.00151463		0.0011103		0.000141992	1.78874e-05	0.000144823	5.13884e-05	3.56805e-05	5.946e-05		4.41831e-05	0.966943	-0.0484967	0.974296	0.648256	-0.625364	0.729182
P0AEK4	fabI	Enoyl-[acyl-carrier-protein] reductase [NADH] (EC 1.3.1.9)	Inner Membrane	0.0618724	0.068116	0.12607	0.068437	0.0771631	0.0469471	0.0601236	0.189798	0.0706221	0.0024084	0.00274461	0.00272733	0.00275303	0.00304872	0.00181718	0.00236028	0.00275514	0.00281032	0.966826	-0.0486713	0.839966	1.00576	0.00828762	0.936925
P63389	yheS	Glutathione-regulated potassium-efflux system ATP-binding protein	Inner Membrane		0.00175646	0.00330739	0.000625074	0.00357501	0.00102396	0.000951275		0.000700752		7.07733e-05	7.15502e-05	2.5145e-05	0.000141249	3.96343e-05	3.73444e-05		2.78856e-05	0.965069	-0.0512954	0.951937	0.458322	-1.12557	0.0759976
P0A6V8	glk	Glucokinase (EC 2.7.1.2)	Cytoplasmic	0.0112111	0.00576069	0.0112617	0.00622467	0.00909162	0.00698631	0.00442952	0.0403954	0.00579052	0.000436396	0.000232117	0.00024363	0.000250401	0.000359211	0.000270419	0.00017389	0.000586389	0.000230427	0.964795	-0.051706	0.894589	1.08613	0.119198	0.86835
P68919	rplY	LSU ribosomal protein L25p	Cytoplasmic	0.0434705	0.058829	0.0458353	0.0421058	0.0422094	0.0390138	0.0452143	0.138528	0.0443819	0.0016921	0.00237041	0.000991577	0.0016938	0.0016677	0.0015101	0.00177498	0.0020109	0.00176612	0.963893	-0.0530556	0.89316	1.09852	0.135558	0.719685
P0AC86	glgP	Glycogen phosphorylase (EC 2.4.1.1)	Cytoplasmic	0.00109187	0.00519643	0.0103206	0.0040517	0.00284753	0.00470036	0.00114825		0.000651541	4.25013e-05	0.000209381	0.00022327	0.000162989	0.000112506	0.000181937	4.50771e-05		2.59273e-05	0.962705	-0.0548342	0.93083	0.224153	-2.15745	0.165579
P00887	aroH	2-keto-3-deoxy-D-arabino-heptulosonate-7-phosphate synthase I alpha (EC 2.5.1.54)	Cytoplasmic	0.000649519	0.00130918	0.000684217		0.000685243	0.00083836				2.52828e-05	5.27509e-05	1.4802e-05		2.7074e-05	3.24503e-05				0.96177	-0.0562368	0.927436	OFF	OFF
P0AFK0	pmbA	TldE protein, part of TldE/TldD proteolytic complex	Cytoplasmic	0.00615134	0.00600644	0.00991732	0.0059902	0.00598394	0.00494039	0.00854809	0.0231924	0.00497256	0.000239443	0.000242019	0.000214546	0.000240969	0.000236426	0.000191227	0.000335574	0.000336666	0.000197877	0.960653	-0.0579121	0.648143	1.25015	0.322106	0.334293
P0AC53	zwf	Glucose-6-phosphate 1-dehydrogenase (EC 1.1.1.49)	Cytoplasmic	0.0186794	0.0225548	0.0383033	0.0228735	0.0204385	0.0164984	0.0144801	0.155532	0.0104058	0.000727102	0.000908805	0.000828633	0.000920136	0.000807525	0.000638604	0.000568447	0.00225773	0.000414084	0.960124	-0.0587074	0.755904	1.31475	0.394793	0.704698
P0A799	pgk	Phosphoglycerate kinase (EC 2.7.2.3)	Inner Membrane	0.160586	0.094378	0.167748	0.100175	0.138801	0.0932073	0.14048	0.574743	0.108617	0.00625085	0.00380279	0.00362896	0.00402978	0.00548405	0.00360777	0.00551486	0.00834311	0.00432229	0.958998	-0.0603999	0.8646	1.32871	0.410029	0.368983
P42641	obgE	GTP-binding protein Obg	Inner Membrane	0.00814741	0.00604396	0.0143123	0.00511491	0.0117254	0.00422121	0.00317449		0.00424428	0.000317141	0.00024353	0.000309624	0.000205759	0.000463271	0.00016339	0.000124622		0.000168896	0.956479	-0.0641947	0.906764	0.505893	-0.983095	0.0251074
P0A707	infC	Translation initiation factor 3	Inner Membrane	0.0374441	0.0256957	0.0477873	0.0114718	0.0361872	0.0382238	0.0183924	0.0483567	0.0435527	0.00145753	0.00103536	0.0010338	0.00046148	0.00142976	0.00147953	0.000722033	0.000701957	0.00173313	0.955786	-0.0652402	0.89532	0.895206	-0.159708	0.762663
P0AGK8	iscR	Iron-sulfur cluster regulator IscR	Cytoplasmic	0.00208832	0.0191176	0.000776437	0.00899195	0.00569451	0.00623349	0.00574911		0.00249226	8.12888e-05	0.000770307	1.6797e-05	0.000361721	0.00022499	0.000241279	0.000225694		9.91764e-05	0.953474	-0.0687339	0.960887	0.561158	-0.833522	0.655763
P26616	maeA	NAD-dependent malic enzyme (EC 1.1.1.38)	Cytoplasmic	0.0156199	0.0114919	0.0382096	0.0137756	0.016488	0.0155532	0.017891	0.0241549	0.0142151	0.000608011	0.000463045	0.000826605	0.000554155	0.000651442	0.000602016	0.000702349	0.000350639	0.000565674	0.952548	-0.0701362	0.806577	0.852978	-0.22942	0.561659
P69776	lpp	Major outer membrane lipoprotein Lpp (Braun lipoprotein) (Murein-lipoprotein)	Outer Membrane	0.123486	0.128981	0.205533	0.0908399	0.0533089	0.206677	0.0772177	0.167261	0.0527811	0.00480673	0.00519704	0.00444638	0.00365423	0.00210624	0.00799985	0.00303135	0.002428	0.00210036	0.952261	-0.0705708	0.90859	0.523157	-0.934683	0.00325626
P00350	gnd	6-phosphogluconate dehydrogenase, decarboxylating (EC 1.1.1.44)	Inner Membrane	0.0886101	0.0800062	0.178319	0.072468	0.0995671	0.0820951	0.0795147	0.252778	0.0908987	0.00344918	0.0032237	0.00385765	0.00291519	0.0039339	0.00317765	0.00312152	0.00366938	0.00361721	0.952159	-0.0707261	0.66771	0.988375	-0.0168702	0.880526
P24255	rpoN	RNA polymerase sigma-54 factor RpoN	Cytoplasmic		0.00209387	0.0038987	0.00127776	0.00258973	0.00224611					8.43688e-05	8.43422e-05	5.14009e-05	0.00010232	8.69402e-05				0.950981	-0.0725117	0.809631
P0ADE6	ygaU	Uncharacterized protein YgaU	Inner Membrane	0.000791718	0.00136006	0.0037834	0.00137411	0.00133071	0.00132423				3.08179e-05	5.48013e-05	8.18481e-05	5.52766e-05	5.25764e-05	5.12569e-05				0.950095	-0.0738557	0.867758	OFF	OFF
P0ADY1	ppiD	Peptidyl-prolyl cis-trans isomerase D (PPIase D) (EC 5.2.1.8) (Rotamase D)	Inner Membrane	0.00252716	0.00952192	0.0106614	0.00747345	0.00135165	0.00831494	0.0033714		0.00398779	9.83707e-05	0.000383669	0.000230644	0.000300636	5.34036e-05	0.000321846	0.000132352		0.000158689	0.948368	-0.0764816	0.923031	0.61256	-0.707077	0.380415
P0A9L3	fklB	FKBP-type 22 kDa peptidyl-prolyl cis-trans isomerase (FKBP22) (PPIase) (EC 5.2.1.8) (Rotamase)	Cytoplasmic	0.069787	0.0602279	0.110781	0.0682944	0.0658307	0.0464653	0.0721599	0.155358	0.0679195	0.00271648	0.00242677	0.00239658	0.00274729	0.00260097	0.00179853	0.00283279	0.00225521	0.00270278	0.947872	-0.077236	0.708348	1.03328	0.0472342	0.705528
P0A9V1	lptB	Lipopolysaccharide ABC transporter, ATP-binding protein LptB	Inner Membrane	0.0039853	0.000914557	0.00625417	0.00310571	0.00433155	0.000357338				0.000155129	3.68504e-05	0.000135299	0.000124934	0.00017114	1.38314e-05				0.946916	-0.0786923	0.927158	OFF	OFF
P09832	gltD	Glutamate synthase [NADPH] small chain (EC 1.4.1.13)	Cytoplasmic	0.00314491	0.00316689	0.00485467	0.00366007	0.00338423	0.00142301	0.00345397		0.00169429	0.000122417	0.000127604	0.000105023	0.000147234	0.000133711	5.50804e-05	0.000135593		6.74224e-05	0.946433	-0.0794279	0.848113	0.857704	-0.221448	0.707895
P08390	usg	Aspartate-semialdehyde dehydrogenase (EC 1.2.1.11)	Cytoplasmic	0.00299226		0.00699082	0.00303919	0.00434608	0.00221791	0.00290547		0.00291478	0.000116475		0.000151236	0.000122258	0.000171714	8.58486e-05	0.00011406		0.00011599	0.945849	-0.0803183	0.826634	0.859326	-0.218722	0.474151
P0A7E5	pyrG	CTP synthase (EC 6.3.4.2)	Inner Membrane	0.0245516	0.0571075	0.0566258	0.0398414	0.0351579	0.0320393	0.0540687	0.0707495	0.0217884	0.000955679	0.00230104	0.00122501	0.00160271	0.00138909	0.00124014	0.00212258	0.00102702	0.000867042	0.944264	-0.0827375	0.860654	0.896224	-0.158068	0.799023
P0A9N4	pflA	Pyruvate formate-lyase activating enzyme (EC 1.97.1.4)	Cytoplasmic	0.00374043	0.00224809	0.00450889		0.0041128	0.00122218	0.00504541		0.00335125	0.000145598	9.05826e-05	9.75428e-05		0.000162497	4.73069e-05	0.000198069		0.000133359	0.943014	-0.0846487	0.93103	1.48968	0.575004	0.305339
Q46811	ygfK	Uncharacterized protein YgfK	Cytoplasmic		0.00210342	0.0032582	0.00296764	0.000683161						8.47535e-05	7.04862e-05	0.00011938	2.69917e-05					0.942874	-0.0848627	0.939248
P0AC59	grxB	Glutaredoxin 2	Cytoplasmic	0.0061379	0.00131617	0.00237251	0.000671291	0.00522945	0.0023073		0.00737832	0.00284004	0.00023892	5.30325e-05	5.13257e-05	2.70042e-05	0.000206616	8.93085e-05		0.000107105	0.000113016	0.940721	-0.0881618	0.937797	0.961849	-0.0561171	0.950503
P37095	pepB	Peptidase B (EC 3.4.11.23)	Cytoplasmic	0.0338329	0.0492948	0.0748871	0.0392625	0.0318267	0.0463487	0.039053	0.0575759	0.0276858	0.00131696	0.00198624	0.00162007	0.00157942	0.00125748	0.00179402	0.00153311	0.000835784	0.00110172	0.940618	-0.0883195	0.715788	0.704942	-0.504424	0.159633
P63224	gmhA	Phosphoheptose isomerase 1 (EC 5.3.1.-)	Cytoplasmic	0.0109502	0.00463447	0.0159235	0.00890823	0.0101568	0.00361844	0.00955614	0.0345435	0.0142817	0.000426242	0.000186738	0.00034448	0.000358353	0.000401295	0.000140059	0.000375147	0.000501441	0.000568321	0.939681	-0.0897575	0.866315	1.50911	0.593695	0.14947
P0AE22	aphA	NMN phosphatase (EC 3.1.3.5)	Periplasmic	0.00880427	0.00322691	0.018057	0.00716441	0.0060816	0.00727895	0.00382723		0.00148717	0.00034271	0.000130023	0.000390634	0.000288204	0.000240284	0.000281746	0.000150246		5.918e-05	0.938459	-0.0916338	0.846908	0.363854	-1.45857	0.144324
P69797	manX	PTS system, mannose-specific IIB component (EC 2.7.1.69)	Inner Membrane	0.0018202	0.00116331	0.00290324		0.00142252	0.00146549		0.0181959	0.00793193	7.08519e-05	4.68733e-05	6.28072e-05		5.62039e-05	5.67245e-05		0.000264136	0.000315642	0.938295	-0.091887	0.650883	4.81723	2.2682	0.055006
P0A7I0	prfA	Peptide chain release factor 1	Cytoplasmic	0.00210183	0.00120739	0.00587695	0.00182811	0.00170508	0.002596	0.00137748		0.00116881	8.18146e-05	4.86496e-05	0.000127139	7.354e-05	6.7368e-05	0.000100483	5.40761e-05		4.65114e-05	0.937067	-0.0937757	0.843291	0.585712	-0.771736	0.256615
P68767	pepA	Cytosol aminopeptidase PepA (EC 3.4.11.1)	Inner Membrane	0.00584345	0.00444638	0.0280849	0.0049391	0.0099888	0.00920159	0.00933392	0.0490435	0.0108774	0.000227459	0.000179159	0.000607572	0.000198686	0.000394658	0.000356165	0.000366423	0.000711926	0.000432852	0.936225	-0.095073	0.894278	1.49006	0.575368	0.392755
P15639	purH	IMP cyclohydrolase (EC 3.5.4.10)	Cytoplasmic	0.00222282	0.00161511	0.0023373	0.00187724	0.00158708	0.00131426	0.00261693		0.00124159	8.65239e-05	6.5078e-05	5.05638e-05	7.55162e-05	6.27056e-05	5.08711e-05	0.000102733		4.94077e-05	0.935337	-0.0964425	0.749816	1.12883	0.174834	0.80269
P33599	nuoC	NADH-ubiquinone oxidoreductase chain C (EC 1.6.5.3)	Inner Membrane	0.00958996	0.0207553	0.0353363	0.0154838	0.00798365	0.0234453	0.00884768	0.0288608	0.0130175	0.000373292	0.000836297	0.000764447	0.000622871	0.000315435	0.000907496	0.000347335	0.00041895	0.000518015	0.935039	-0.096901	0.85786	0.650596	-0.620167	0.246579
P76055	ttcA	tRNA(Cytosine32)-2-thiocytidine synthetase	Cytoplasmic	0.000703421	0.000958516	0.00276934		0.00115993	0.000843192				2.73809e-05	3.86217e-05	5.99104e-05		4.58289e-05	3.26374e-05				0.934767	-0.0973212	0.828571	OFF	OFF
P0AA10	rplM	LSU ribosomal protein L13p (L13Ae)	Cytoplasmic	0.144569	0.0944169	0.253422	0.0564844	0.169907	0.127976	0.120778	0.323858	0.179614	0.00562742	0.00380436	0.0054824	0.00227221	0.00671303	0.00495356	0.00474142	0.0047012	0.00714753	0.934601	-0.0975774	0.834368	1.11237	0.153642	0.60832
P0A8A2	yeeN	Probable transcriptional regulatory protein YeeN	Cytoplasmic	0.00632419	0.00281931	0.0144097		0.00816891	0.00247069	0.00792638	0.00484223	0.00532414	0.000246171	0.000113599	0.000311732		0.000322754	9.56327e-05	0.000311167	7.02909e-05	0.000211868	0.934591	-0.0975934	0.921803	0.88358	-0.178568	0.789256
P21888	cysS	Cysteinyl-tRNA synthetase (EC 6.1.1.16)	Cytoplasmic	0.00736433	0.00493941	0.013041	0.00961183	0.00567881	0.00272559	0.0067204	0.0094092	0.00454783	0.000286659	0.000199024	0.000282122	0.000386657	0.00022437	0.000105499	0.000263824	0.000136586	0.000180976	0.933213	-0.0997212	0.858106	0.757204	-0.401246	0.260491
P0AB91	aroG	2-keto-3-deoxy-D-arabino-heptulosonate-7-phosphate synthase I alpha (EC 2.5.1.54)	Cytoplasmic	0.00890878	0.00432864	0.0162199	0.00529911	0.0102072	0.00506132	0.0052253	0.0197773	0.00679418	0.000346777	0.000174415	0.000350893	0.000213169	0.000403288	0.000195908	0.000205131	0.000287092	0.000270366	0.93152	-0.102341	0.832853	0.874444	-0.193563	0.608505
P0A6I0	cmk	Cytidylate kinase (EC 2.7.4.25)	Cytoplasmic	0.00464741	0.00353352	0.00325505	0.00428212	0.00290702	0.00199813	0.00582638		0.00296188	0.000180902	0.000142377	7.0418e-05	0.000172258	0.000114857	7.73414e-05	0.000228727		0.000117864	0.925726	-0.111343	0.830292	1.32053	0.401114	0.589718
P31120	glmM	Phosphoglucosamine mutase (EC 5.4.2.10)	Cytoplasmic	0.0271279	0.0278973	0.0813452	0.0383423	0.0252903	0.0284688	0.0174355	0.0827637	0.0315677	0.00105596	0.00112407	0.00175978	0.0015424	0.000999222	0.00110194	0.000684469	0.00120142	0.0012562	0.924806	-0.112777	0.742879	0.79752	-0.326407	0.411303
P67910	hldD	ADP-L-glycero-D-manno-heptose-6-epimerase (EC 5.1.3.20)	Inner Membrane	0.0305447	0.0229918	0.0568072	0.0146254	0.0305507	0.0334819	0.0190485	0.0607023	0.025571	0.00118896	0.000926413	0.00122894	0.000588341	0.00120706	0.00129598	0.00074779	0.000881168	0.00101757	0.924369	-0.113459	0.752809	0.791351	-0.337609	0.133724
P0A870	talB	Transaldolase (EC 2.2.1.2)	Inner Membrane	0.0856867	0.0692597	0.111349	0.0605267	0.076556	0.0626709	0.0749738	0.212292	0.0903588	0.00333539	0.0027907	0.00240885	0.00243482	0.00302473	0.0024258	0.00294326	0.00308168	0.00359572	0.923891	-0.114205	0.555012	1.12721	0.172754	0.344597
P39160	uxuB	D-mannonate oxidoreductase (EC 1.1.1.57)	Cytoplasmic	0.0119079	0.00619037	0.00801227	0.00713909	0.00733095	0.00624661	0.00823722	0.0380622	0.00487944	0.000463518	0.00024943	0.000173333	0.000287186	0.000289646	0.000241787	0.00032337	0.000552519	0.000194171	0.923657	-0.114571	0.820886	1.20736	0.271856	0.676719
P0ADX1	yhfA	Protein YhfA	Cytoplasmic	0.00423645	0.00279123			0.00318492	0.00336513				0.000164905	0.000112467			0.000125836	0.000130254				0.92327	-0.115176	0.754589
P76177	ydgH	Protein YdgH	Periplasmic	0.00746911	0.0058256	0.00733547	0.00443136	0.00436619	0.00723541	0.00364216		0.00449217	0.000290738	0.000234732	0.000158692	0.000178261	0.000172509	0.00028006	0.000142981		0.00017876	0.922049	-0.117085	0.748922	0.705406	-0.503473	0.219432
P0A6L2	dapA	4-hydroxy-tetrahydrodipicolinate synthase (EC 4.3.3.7)	Cytoplasmic	0.0177435	0.0125768	0.0372961	0.0168221	0.016038	0.0138046	0.00880058	0.0367275	0.0134786	0.000690672	0.000506758	0.000806843	0.000676707	0.000633663	0.000534335	0.000345486	0.000533144	0.000536366	0.920386	-0.119689	0.623042	0.70599	-0.502281	0.149462
P00509	aspC	Biosynthetic Aromatic amino acid aminotransferase alpha (EC 2.6.1.57)	Inner Membrane	0.029812	0.0286426	0.0407394	0.024108	0.025189	0.0251651	0.0305921	0.0911741	0.0226313	0.00116044	0.0011541	0.000881334	0.000969797	0.00099522	0.000974062	0.00120096	0.0013235	0.000900584	0.919648	-0.120847	0.450548	1.07171	0.0999126	0.651624
P37647	kdgK	2-dehydro-3-deoxygluconate kinase (EC 2.7.1.45)	Cytoplasmic	0.00349183	0.000779182			0.00275591	0.00116198				0.000135921	3.13957e-05			0.000108886	4.49766e-05				0.919592	-0.120935	0.924378
P15034	pepP	Xaa-Pro aminopeptidase (EC 3.4.11.9)	Cytoplasmic	0.0145819	0.0145102	0.0342629	0.0151429	0.0172274	0.0115385	0.0126315	0.0308097	0.00717418	0.000567606	0.000584664	0.000741224	0.000609156	0.000680656	0.000446622	0.000495876	0.000447241	0.000285488	0.917052	-0.124925	0.587766	0.648855	-0.624031	0.0592899
P23909	mutS	DNA mismatch repair protein MutS	Cytoplasmic		0.00164912	0.00550953	0.00244253	0.00253345	0.00146765	0.00424439		0.00407358		6.64485e-05	0.00011919	9.8256e-05	0.000100097	5.68081e-05	0.000166623		0.000162103	0.916336	-0.126051	0.824817	1.77079	0.82439	0.222654
P46837	yhgF	Protein YhgF	Inner Membrane	0.00255676	0.005129	0.0194769	0.00853125	0.00514026	0.00310279	0.00491489	0.0156874	0.00700787	9.95229e-05	0.000206664	0.000421352	0.000343189	0.000203092	0.000120099	0.000192945	0.000227722	0.00027887	0.915938	-0.126678	0.86878	0.961512	-0.056624	0.931752
P60906	hisS	Histidyl-tRNA synthetase (EC 6.1.1.21)	Inner Membrane	0.0219028	0.0118026	0.0493279	0.0184014	0.0217999	0.0152935	0.0221421	0.0299563	0.0262182	0.000852575	0.000475566	0.00106713	0.000740238	0.000861315	0.000591964	0.000869235	0.000434852	0.00104332	0.915769	-0.126944	0.748043	0.980018	-0.0291204	0.952233
P11349	narH	Respiratory nitrate reductase beta chain (EC 1.7.99.4)	Inner Membrane	0.000473227	0.00139244	0.00235873		0.000658307	0.00130676	0.00135664		0.0001803	1.84205e-05	5.61057e-05	5.10274e-05		2.60098e-05	5.05807e-05	5.32578e-05		7.17481e-06	0.915033	-0.128105	0.849973	0.721993	-0.469942	0.708256
P0ABC7	hflK	HflK protein	Inner Membrane	0.00397012	0.00298574	0.00486126	0.00310436	0.00340451	0.00227937				0.000154538	0.000120305	0.000105166	0.00012488	0.000134512	8.82275e-05				0.914766	-0.128526	0.623018	OFF	OFF
P0C8J6	gatY	Tagatose 1,6-bisphosphate aldolase (EC 4.1.2.40)	Inner Membrane	0.0298022	0.0159573	0.0796971	0.0296375	0.0329613	0.0189035	0.0213073	0.0980863	0.0500357	0.00116006	0.000642972	0.00172412	0.00119224	0.0013023	0.000731697	0.000836465	0.00142384	0.00199111	0.914684	-0.128654	0.796663	1.20534	0.269438	0.625159
P0AAI9	fabD	Malonyl CoA-acyl carrier protein transacylase (EC 2.3.1.39)	Cytoplasmic	0.0435674	0.0300194	0.0447024	0.0222533	0.0473609	0.0199574	0.0277265	0.0891241	0.0300754	0.00169587	0.00120958	0.000967067	0.000895187	0.00187123	0.00077249	0.00108846	0.00129375	0.00119681	0.913852	-0.129968	0.801405	0.924211	-0.113707	0.697799
P00959	metG	Methionine--tRNA ligase (EC 6.1.1.10) (Methionyl-tRNA synthetase) (MetRS)	Inner Membrane	0.00871885	0.0165376	0.0253933	0.0102827	0.0126264	0.013078	0.0113978	0.0197443	0.0166981	0.000339384	0.000666353	0.000549344	0.000413645	0.000498868	0.00050621	0.000447447	0.000286612	0.000664482	0.912314	-0.132398	0.68802	0.899337	-0.153067	0.738109
P0A8A0	yebC	FIG000859: hypothetical protein YebC	Cytoplasmic	0.0115864	0.0115342	0.0138104	0.0132317	0.0075487	0.0071584	0.0138033	0.022261	0.0144326	0.000451006	0.00046475	0.000298767	0.000532274	0.00029825	0.00027708	0.000541877	0.000323146	0.000574327	0.911966	-0.132948	0.736185	1.18512	0.245028	0.480639
P05707	srlD	Sorbitol-6-phosphate 2-dehydrogenase (EC 1.1.1.140)	Cytoplasmic	0.004714	0.00858287	0.0129217	0.00747741	0.00551515	0.00561789	0.00758725	0.0192423	0.00647934	0.000183494	0.000345831	0.000279542	0.000300795	0.000217904	0.000217451	0.000297854	0.000279326	0.000257838	0.910101	-0.135902	0.685469	1.03233	0.0459039	0.872391
P0A6P1	tsf	Translation elongation factor Ts	Inner Membrane	0.145609	0.101448	0.286091	0.129027	0.123721	0.113467	0.143344	0.405606	0.0833868	0.00566788	0.00408766	0.00618914	0.00519041	0.00488823	0.00439197	0.00562729	0.00588787	0.00331828	0.907551	-0.139949	0.52712	0.930307	-0.104222	0.738984
P0ACA7	gstB	Uncharacterized glutathione S-transferase-like protein	Cytoplasmic	0.00180976	0.00241839	0.00391872	0.00249812	0.00132455		0.00140398	0.0108853	0.00261142	7.04456e-05	9.74447e-05	8.47755e-05	0.000100492	5.23329e-05		5.51164e-05	0.000158013	0.000103918	0.907276	-0.140387	0.802177	1.25481	0.327467	0.549427
P06616	era	GTP-binding protein Era	Inner Membrane		0.00339101	0.0220765		0.00884172	0.00535755					0.000136635	0.000477592		0.000349337	0.000207374				0.906362	-0.141841	0.89643
P0A9H9	cheZ	Chemotaxis response - phosphatase CheZ	Inner Membrane	0.0614043	0.0360414	0.111043	0.0395585	0.0516358	0.0521475	0.0271617	0.0146544	0.0859926	0.00239018	0.00145222	0.00240224	0.00159133	0.00204013	0.00201847	0.00106629	0.000212727	0.00342197	0.904763	-0.144388	0.610034	0.752803	-0.409656	0.65306
P39177	uspG	Universal stress protein G	Inner Membrane	0.0106986	0.00147846	0.0229877		0.0132999	0.00154835	0.00437065	0.0482384	0.0207098	0.000416447	5.95719e-05	0.000497303		0.000525481	5.9932e-05	0.000171579	0.000700239	0.000824123	0.902188	-0.1485	0.91856	1.74242	0.801096	0.381689
P0ADP9	yihD	Protein YihD	Cytoplasmic	0.00543689	0.00519453			0.00602763	0.00364733				0.000211633	0.000209304			0.000238152	0.000141177				0.901154	-0.150154	0.741979
P21156	cysD	Sulfate adenylyltransferase subunit 2 (EC 2.7.7.4)	Cytoplasmic	0.000577481	0.00106639	0.00438055		0.00198567	0.000454918				2.24786e-05	4.29683e-05	9.47663e-05		7.8454e-05	1.76085e-05				0.899387	-0.152986	0.898554	OFF	OFF
P04079	guaA	GMP synthase [glutamine-hydrolyzing] (EC 6.3.5.2) (GMP synthetase) (GMPS) (Glutamine amidotransferase)	Inner Membrane	0.0347847	0.0518621	0.087733	0.0353711	0.0508706	0.03522	0.0282455	0.0511456	0.0322559	0.00135401	0.00208969	0.00189797	0.00142288	0.0020099	0.00136326	0.00110884	0.000742442	0.00128358	0.897854	-0.155447	0.579454	0.58687	-0.768886	0.0595145
P0AB71	fbaA	Fructose-bisphosphate aldolase class II (EC 4.1.2.13)	Inner Membrane	0.112423	0.0965514	0.168922	0.0930349	0.0993983	0.0776383	0.0894145	0.258193	0.0981307	0.00437609	0.00389037	0.00365437	0.00374253	0.00392723	0.00300514	0.00351016	0.00374799	0.00390499	0.895484	-0.159261	0.308942	0.93644	-0.0947419	0.370737
P76558	maeB	NADP-dependent malic enzyme (EC 1.1.1.40)	Inner Membrane	0.0604448	0.0536332	0.139746	0.0462822	0.0600823	0.0648038	0.0460367	0.180742	0.0599162	0.00235284	0.00216105	0.00302318	0.0018618	0.00237385	0.00250836	0.00180727	0.00262369	0.00238429	0.89478	-0.160396	0.467714	0.904231	-0.145236	0.53681
P0AAC8	iscA	Iron-binding protein IscA (Iron-sulfur cluster assembly protein)	Cytoplasmic	0.00761358	0.0052304	0.0113778	0.0074452	0.0056133	0.00394007	0.012228	0.0288098	0.0300319	0.000296361	0.00021075	0.000246142	0.0002995	0.000221782	0.000152508	0.000480036	0.00041821	0.00119508	0.894506	-0.160836	0.62519	2.77905	1.47459	0.21407
P0A8P3	yggX	FIG001341: Probable Fe(2+)-trafficking protein YggX	Inner Membrane	0.0254731	0.0173046	0.0265978	0.0107728	0.0281191	0.0124236	0.0164651	0.0356659	0.0106356	0.000991549	0.000697256	0.000575402	0.000433359	0.00111099	0.000480878	0.000646375	0.000517735	0.00042323	0.894453	-0.160923	0.770693	0.701058	-0.512395	0.203453
P0ACB2	hemB	Porphobilinogen synthase (EC 4.2.1.24)	Cytoplasmic	0.00304338	0.00452136	0.00608336	0.0035202	0.00343839	0.0028054	0.00117253		0.00355971	0.000118465	0.00018218	0.000131604	0.000141608	0.000135851	0.000108589	4.60303e-05		0.000141655	0.893114	-0.163084	0.532763	0.651308	-0.618588	0.473166
P0AES6	gyrB	DNA gyrase subunit B (EC 5.99.1.3)	Inner Membrane	0.00775513	0.0204854	0.0438549	0.0182066	0.0159492	0.0126248	0.0117726	0.0770013	0.0198868	0.000301871	0.000825424	0.000948732	0.000732401	0.000630155	0.000488666	0.000462159	0.00111777	0.000791369	0.891714	-0.165348	0.74972	1.14223	0.191852	0.737737
P0A8L1	serS	Seryl-tRNA synthetase (EC 6.1.1.11)	Inner Membrane	0.0320769	0.02822	0.0422645	0.0205209	0.0280377	0.0260413	0.0256617	0.110235	0.0283888	0.00124861	0.00113707	0.000914327	0.000825499	0.00110777	0.00100798	0.00100741	0.0016002	0.0011297	0.891286	-0.166039	0.405816	1.13252	0.179532	0.528291
P0A9U6	puuR	Putrescine utilization regulator	Cytoplasmic	0.00462039	0.00425283	0.00596765	0.00301125	0.00414008					0.00017985	0.00017136	0.000129101	0.000121134	0.000163575					0.889139	-0.169519	0.568171	OFF	OFF
P0AF24	nagD	Phosphatase NagD predicted to act in N-acetylglucosamine utilization subsystem	Cytoplasmic	0.00698003	0.00510614	0.0102622		0.00544299	0.00512813	0.00235998		0.00249392	0.0002717	0.000205743	0.000222006		0.000215053	0.000198494	9.26462e-05		9.92427e-05	0.886871	-0.173204	0.319278	0.411515	-1.28098	0.0180997
P0A993	fbp	Fructose-1,6-bisphosphatase, type I (EC 3.1.3.11)	Cytoplasmic	0.0153125	0.0183708	0.0166123	0.00919713	0.0208356	0.00792201	0.00880749	0.030456	0.00872158	0.000596043	0.00074022	0.000359381	0.000369975	0.000823217	0.000306637	0.000345757	0.000442106	0.000347065	0.884519	-0.177035	0.75904	0.66932	-0.579232	0.229401
P0ABK5	cysK	Cysteine synthase (EC 2.5.1.47)	Inner Membrane	0.0387751	0.0283091	0.0703106	0.0145584	0.0521112	0.0269584	0.0368599	0.116441	0.0189721	0.00150933	0.00114066	0.00152106	0.000585642	0.00205892	0.00104348	0.00144701	0.00169028	0.000754973	0.884197	-0.177561	0.751901	0.93316	-0.0998034	0.783268
P0AFL6	ppx	Exopolyphosphatase (EC 3.6.1.11)	Inner Membrane	0.00155255	0.00384117	0.00113835		0.00143555	0.00218409	0.000159177		0.00179475	6.04336e-05	0.000154773	2.46264e-05		5.67189e-05	8.45393e-05	6.24885e-06		7.142e-05	0.883479	-0.178733	0.838658	0.485769	-1.04166	0.478212
P07913	tdh	L-threonine 3-dehydrogenase (EC 1.1.1.103)	Cytoplasmic	0.0355015	0.0547891	0.0939464	0.0556129	0.0245797	0.0453262	0.0478702	0.397744	0.018483	0.00138191	0.00220763	0.00203238	0.00223715	0.000971145	0.00175444	0.00187925	0.00577374	0.000735511	0.882747	-0.179928	0.651521	1.49211	0.57735	0.608512
P0A825	glyA	Serine hydroxymethyltransferase (EC 2.1.2.1)	Inner Membrane	0.0707794	0.0610125	0.108775	0.0722601	0.046768	0.0495715	0.0683512	0.263158	0.0556147	0.00275511	0.00245839	0.00235319	0.00290682	0.00184781	0.00191876	0.00268327	0.00382006	0.00221312	0.881943	-0.181242	0.482516	1.15195	0.204079	0.509412
P76004	ycgM	Uncharacterized protein YcgM	Cytoplasmic	0.00459161		0.00437913	0.00483755		0.0011964				0.00017873		9.47356e-05	0.000194601		4.63088e-05				0.880951	-0.182866	0.870128
P0AEP3	galU	UTP--glucose-1-phosphate uridylyltransferase (EC 2.7.7.9)	Cytoplasmic	0.0250176	0.0443193	0.0351687	0.0268363	0.0203493	0.031445	0.0419957	0.113442	0.0246972	0.000973821	0.00178577	0.00076082	0.00107955	0.000804002	0.00121714	0.00164863	0.00164675	0.000982797	0.880776	-0.183153	0.708399	1.21525	0.281255	0.5492
P06987	hisB	Imidazoleglycerol-phosphate dehydratase (EC 4.2.1.19)	Inner Membrane	0.00240965	0.00107357	0.00282191	0.00154516	0.00178654	0.0010749	0.00113219		0.00233595	9.37964e-05	4.32575e-05	6.10476e-05	6.21577e-05	7.05863e-05	4.16059e-05	4.44466e-05		9.29564e-05	0.880104	-0.184254	0.673306	1.0404	0.0571358	0.934769
P62620	ispG	1-hydroxy-2-methyl-2-(E)-butenyl 4-diphosphate synthase (EC 1.17.7.1)	Inner Membrane	0.0106222	0.00773691	0.0151285	0.00876355	0.00844732	0.00616234	0.0108263	0.0291621	0.00747887	0.000413474	0.000311745	0.000327281	0.000352533	0.000333754	0.000238525	0.000425009	0.000423323	0.000297613	0.878682	-0.186587	0.420524	1.08878	0.122718	0.588836
P0A9J6	rbsK	Ribokinase (EC 2.7.1.15)	Cytoplasmic	0.00504043	0.00470916	0.000749391	0.0030276	0.00387225	0.00202748	0.00185328		0.0011297	0.000196201	0.000189747	1.62119e-05	0.000121792	0.000152993	7.84776e-05	7.27546e-05		4.49551e-05	0.878414	-0.187028	0.814838	0.439041	-1.18757	0.329716
P76256	tsaB	TsaB protein, required for threonylcarbamoyladenosine (t(6)A) formation in tRNA	Cytoplasmic	0.00146459		0.00443617		0.00234352	0.00107113				5.70098e-05		9.59698e-05		9.25927e-05	4.14603e-05				0.87628	-0.190536	0.797894
P23869	ppiB	Peptidyl-prolyl cis-trans isomerase B (PPIase B) (EC 5.2.1.8) (Rotamase B)	Inner Membrane	0.0275448	0.00733938	0.0220395	0.00556645	0.0236762	0.0117312	0.0212462	0.0882574	0.0256096	0.00107219	0.000295727	0.000476791	0.000223923	0.000935447	0.000454078	0.000834067	0.00128116	0.0010191	0.874635	-0.193248	0.818612	1.69909	0.764766	0.20363
P75838	ycaO	Ribosomal protein S12 methylthiotransferase accessory factor YcaO	Cytoplasmic	0.00621698	0.00254915	0.00425811	0.00230114	0.00419227	0.00317694	0.0051423	0.0133287	0.00371899	0.000241998	0.000102714	9.21177e-05	9.25685e-05	0.000165637	0.000122969	0.000201872	0.000193483	0.000147993	0.872594	-0.196617	0.750273	1.24384	0.314807	0.546774
P0AFG8	aceE	Pyruvate dehydrogenase E1 component (EC 1.2.4.1)	Inner Membrane	0.126835	0.192053	0.258905	0.13059	0.1168	0.156676	0.134788	0.43309	0.140221	0.00493708	0.00773843	0.00560101	0.00525326	0.00461478	0.00606446	0.00529138	0.00628683	0.00557994	0.871747	-0.198019	0.469673	0.938809	-0.0910969	0.710467
P0A763	ndk	Nucleoside diphosphate kinase (EC 2.7.4.6)	Inner Membrane	0.0939311	0.0836885	0.115898	0.0701316	0.0664702	0.0739374	0.0842157	0.148119	0.0691645	0.0036563	0.00337208	0.00250727	0.0028212	0.00262624	0.00286189	0.00330607	0.00215013	0.00275232	0.871397	-0.198598	0.358202	0.860824	-0.216209	0.409315
P16095	sdaA	L-serine dehydratase, alpha subunit (EC 4.3.1.17)	Inner Membrane	0.00218269	0.00420833	0.00736115	0.00367315	0.00303627	0.00239773	0.00510739	0.00923904	0.00224542	8.4962e-05	0.000169567	0.000159247	0.00014776	0.000119963	9.28089e-05	0.000200502	0.000134116	8.93538e-05	0.871322	-0.198722	0.604247	1.02464	0.0351165	0.939334
P0AGJ9	tyrS	Tyrosine--tRNA ligase (EC 6.1.1.1) (Tyrosyl-tRNA synthetase) (TyrRS)	Inner Membrane	0.00911772	0.00665404	0.0221204	0.00740892	0.00971582	0.00705524	0.0119924	0.00943515	0.0142535	0.00035491	0.000268113	0.000478541	0.00029804	0.000383873	0.000273087	0.000470789	0.000136963	0.000567203	0.866949	-0.205981	0.532039	1.06662	0.0930516	0.876434
P0AC38	aspA	Aspartate ammonia-lyase (EC 4.3.1.1)	Inner Membrane	0.0420511	0.0534695	0.115011	0.0482338	0.0451646	0.0443847	0.0417549	0.10491	0.0334839	0.00163685	0.00215446	0.00248809	0.00194031	0.00178446	0.001718	0.00163918	0.00152289	0.00133245	0.866766	-0.206286	0.377942	0.715757	-0.482458	0.126018
P0A972	cspE	Cold shock protein CspE	Cytoplasmic	0.217565	0.192907	0.377698	0.17566	0.158959	0.2015	0.197811	0.492598	0.105822	0.00846878	0.00777285	0.00817092	0.0070663	0.00628048	0.00779946	0.00776548	0.00715066	0.00421104	0.866204	-0.207222	0.115383	0.783498	-0.351998	0.247162
P0A9S1	fucO	Lactaldehyde reductase (EC 1.1.1.77)	Cytoplasmic	0.00150189	0.0024113	0.00226672	0.000945816	0.00141621	0.00214768				5.84618e-05	9.71591e-05	4.90371e-05	3.80475e-05	5.59547e-05	8.31299e-05				0.865504	-0.208388	0.666108	OFF	OFF
P0A7U3	rpsS	SSU ribosomal protein S19p (S15e)	Cytoplasmic	0.0619	0.0847419	0.0932711	0.0509792	0.0522603	0.068609	0.0993153	0.341214	0.0765059	0.00240948	0.00341452	0.00201778	0.00205075	0.00206481	0.00265565	0.00389884	0.00495314	0.00304446	0.863479	-0.211768	0.497779	1.51706	0.601278	0.127562
P17993	ubiG	Ubiquinone biosynthesis O-methyltransferase (2-octaprenyl-6-hydroxyphenol methylase) (EC 2.1.1.222) (3-demethylubiquinone-8 3-O-methyltransferase) (EC 2.1.1.64)	Cytoplasmic	0.00434743	0.00613311	0.00711893		0.0053826	0.00298528				0.000169225	0.000247123	0.000154007		0.000212667	0.000115551				0.863194	-0.212243	0.696634	OFF	OFF
P0A6T3	galK	Galactokinase (EC 2.7.1.6)	Cytoplasmic	0.00349181	0.00101007	0.00463482	0.000939446	0.00361777	0.00150247	0.004119	0.00586095	0.000941151	0.00013592	4.06988e-05	0.000100267	3.77913e-05	0.000142938	5.81559e-05	0.0001617	8.50789e-05	3.7452e-05	0.862758	-0.212972	0.780921	1.02653	0.0377732	0.959936
P00926	dsdA	D-serine dehydratase (EC 4.3.1.18)	Cytoplasmic	0.0016981	0.00270228	0.0093975	0.00333903	0.00431246	0.000492664	0.00479682		0.00240388	6.60993e-05	0.000108883	0.0002033	0.00013432	0.000170386	1.90695e-05	0.00018831		9.56597e-05	0.855907	-0.224474	0.78095	1.12602	0.171232	0.8167
P68066	grcA	Autonomous glycyl radical cofactor	Inner Membrane	0.088703	0.0508239	0.0996227	0.0582942	0.0510629	0.0564926	0.0909162	0.164165	0.0734569	0.0034528	0.00204786	0.00215518	0.00234501	0.0020175	0.00218665	0.00356911	0.00238306	0.00292313	0.855447	-0.22525	0.50186	1.15928	0.213235	0.515671
Q57261	truD	tRNA pseudouridine 13 synthase (EC 4.2.1.-)	Cytoplasmic	0.00259887	0.00314459	0.000653011	0.001516	0.00192763	0.00180225	0.0046002		0.00104044	0.000101162	0.000126705	1.41269e-05	6.09846e-05	7.61609e-05	6.97595e-05	0.000180591		4.14031e-05	0.854999	-0.226006	0.765043	1.37603	0.460508	0.744036
P50466	aer	Aerotaxis sensor receptor protein	Inner Membrane	0.00348189	0.0087429	0.0171384	0.00559356	0.00475128	0.00828174	0.00514249	0.00259152	0.00618766	0.000135534	0.000352279	0.000370763	0.000225013	0.000187723	0.000320561	0.00020188	3.76191e-05	0.000246231	0.854085	-0.227548	0.657615	0.565738	-0.821793	0.278044
P0A8G6	wrbA	NAD(P)H dehydrogenase (quinone) (EC 1.6.5.2) (Flavoprotein WrbA) (NAD(P)H:quinone oxidoreductase) (NQO)	Cytoplasmic	0.00515728	0.0036512	0.00214485	0.0021426	0.00428593	0.00207214	0.00481032		0.00162309	0.000200749	0.000147118	4.64005e-05	8.6191e-05	0.000169337	8.02062e-05	0.00018884		6.45888e-05	0.851539	-0.231856	0.737446	0.964173	-0.0526366	0.95659
P76027	oppD	Oligopeptide transport ATP-binding protein OppD (TC 3.A.1.5.1)	Inner Membrane	0.00381584	0.0109519	0.0147495	0.00832736	0.0030404	0.0081643	0.00625962		0.00688452	0.000148533	0.000441286	0.000319083	0.000334986	0.000120126	0.000316015	0.000245735		0.000273961	0.848416	-0.237155	0.696567	0.857677	-0.221494	0.663774
P0A955	eda	2-dehydro-3-deoxyphosphogluconate aldolase (EC 4.1.2.14)	Inner Membrane	0.0524667	0.013399	0.0426776	0.0152484	0.0370422	0.0231511	0.0199296	0.0991615	0.0012127	0.00204228	0.00053989	0.000923264	0.000613402	0.00146354	0.000896107	0.000782379	0.00143945	4.82579e-05	0.848124	-0.237653	0.752475	0.64759	-0.626847	0.533155
P0AEK2	fabG	3-oxoacyl-[acyl-carrier protein] reductase (EC 1.1.1.100)	Inner Membrane	0.0543281	0.0393951	0.0802266	0.0336478	0.0527289	0.0303161	0.0480572	0.15808	0.0475862	0.00211474	0.00158735	0.00173558	0.00135356	0.00208332	0.00117344	0.00188659	0.00229472	0.00189364	0.84785	-0.23812	0.448564	1.1172	0.159883	0.364042
P0ACL5	glcC	Glycolate utilization operon transcriptional activator GlcC	Cytoplasmic	0.00112234	0.00115748	0.00181978	0.00120118	0.00110578	0.000462051				4.36874e-05	4.66385e-05	3.93681e-05	4.83202e-05	4.36894e-05	1.78846e-05				0.847334	-0.238998	0.560881	OFF	OFF
P30871	ygiF	Adenylate cyclase (EC 4.6.1.1)	Cytoplasmic		0.00942131	0.0136417	0.0126	0.00506867	0.00387994	0.00330865		0.00240858		0.000379615	0.000295117	0.000506864	0.000200263	0.000150181	0.000129888		9.58466e-05	0.84706	-0.239464	0.699584	0.334555	-1.57969	0.0834314
P0A6M8	fusA	Translation elongation factor G	Inner Membrane	0.177155	0.168216	0.253109	0.080394	0.180352	0.149607	0.147568	0.353562	0.173446	0.00689584	0.00677796	0.00547563	0.00323403	0.00712572	0.00579083	0.0057931	0.00513239	0.00690208	0.843397	-0.245716	0.48337	0.930971	-0.103192	0.557362
P27248	gcvT	Aminomethyltransferase (glycine cleavage system T protein) (EC 2.1.2.10)	Inner Membrane	0.134386	0.0659187	0.1419	0.0807027	0.0847322	0.0682874	0.0930178	0.248726	0.0960018	0.00523102	0.00265608	0.00306978	0.00324645	0.00334777	0.0026432	0.00365161	0.00361056	0.00382028	0.84307	-0.246275	0.552077	1.01146	0.0164396	0.963018
P37773	mpl	UDP-N-acetylmuramate:L-alanyl-gamma-D-glutamyl-meso-diaminopimelate ligase (EC 6.3.2.-)	Cytoplasmic	0.00571281	0.00580179	0.0143266	0.00786565	0.00563649	0.00274959	0.00694421	0.00619296	0.00428741	0.000222373	0.000233773	0.000309933	0.000316413	0.000222698	0.000106428	0.00027261	8.98985e-05	0.000170612	0.842655	-0.246986	0.592192	0.695909	-0.52303	0.283268
P0AB77	kbl	2-amino-3-ketobutyrate coenzyme A ligase (EC 2.3.1.29)	Inner Membrane	0.038257	0.0586392	0.0653419	0.0466314	0.035389	0.0299491	0.0340274	0.0774709	0.0323442	0.00148917	0.00236276	0.00141357	0.00187585	0.00139822	0.00115924	0.00133582	0.00112459	0.0012871	0.841954	-0.248186	0.5003	0.711709	-0.49064	0.235453
P0A734	minE	Cell division topological specificity factor MinE	Inner Membrane	0.00460433	0.0017302	0.00458872	0.00344818	0.0030407	0.000877208	0.0060203		0.00422729	0.000179225	6.97155e-05	9.92699e-05	0.00013871	0.000120138	3.3954e-05	0.00023634		0.00016822	0.840878	-0.250031	0.70828	1.74274	0.801354	0.179664
P0AD12	yeeZ	Protein YeeZ	Periplasmic	0.0017521	0.00161832	0.0114888		0.00264437	0.00282011	0.000810215	0.0179259	0.0012664	6.82013e-05	6.52073e-05	0.000248543		0.000104479	0.000109158	3.18068e-05	0.000260216	5.03949e-05	0.838996	-0.253264	0.767524	0.896495	-0.157633	0.896675
P77181	paaY	Phenylacetic acid degradation protein PaaY	Cytoplasmic	0.00169108	0.000550587		0.00139558	0.000445733					6.58258e-05	2.21849e-05		5.61405e-05	1.76109e-05					0.837982	-0.255008	0.829652
P21645	lpxD	UDP-3-O-[3-hydroxymyristoyl] glucosamine N-acyltransferase (EC 2.3.1.191)	Cytoplasmic	0.0268459	0.00350873	0.00894182	0.00747716	0.0112183	0.0105781	0.00658307		0.00167782	0.00104499	0.000141378	0.000193442	0.000300785	0.000443237	0.000409444	0.000258433		6.67669e-05	0.835961	-0.258492	0.821777	0.353527	-1.50011	0.421654
P77737	oppF	Oligopeptide transport ATP-binding protein OppF (TC 3.A.1.5.1)	Inner Membrane	0.0038386	0.00412453	0.0100621	0.00124976	0.00578318	0.00428914				0.000149419	0.00016619	0.000217679	5.02742e-05	0.000228494	0.000166019				0.834047	-0.261799	0.640438	OFF	OFF
P26608	fliS	Flagellar biosynthesis protein FliS	Cytoplasmic	0.00258776	0.00118753	0.00114473		0.000718439	0.00174253				0.000100729	4.78492e-05	2.47646e-05		2.83856e-05	6.7448e-05				0.829282	-0.270065	0.763124	OFF	OFF
P0C8J8	gatZ	Tagatose-6-phosphate kinase GatZ (EC 2.7.1.144)	Inner Membrane	0.137595	0.0833929	0.267572	0.0683673	0.139139	0.0971284	0.0960919	0.453772	0.146335	0.00535595	0.00336017	0.0057885	0.00275022	0.00549738	0.00375954	0.00377229	0.00658706	0.00582324	0.827815	-0.272619	0.490298	1.11568	0.15793	0.645474
P0AF08	mrp	Iron-sulfur cluster carrier protein	Cytoplasmic	0.00164064	0.00139938	0.0168244	0.000821213	0.00666153	0.00268674	0.00150728		0.00427909	6.38626e-05	5.63857e-05	0.00036397	3.30351e-05	0.000263197	0.000103995	5.91717e-05		0.000170281	0.826544	-0.274836	0.831322	0.710794	-0.492497	0.714449
P0A817	metK	S-adenosylmethionine synthetase (EC 2.5.1.6)	Inner Membrane	0.0172948	0.0178087	0.0263607	0.0058934	0.0200301	0.0152837	0.0105116	0.0467546	0.00968904	0.000673208	0.00071757	0.000570272	0.000237075	0.000791391	0.000591587	0.000412656	0.0006787	0.000385564	0.826115	-0.275586	0.560307	0.753127	-0.409035	0.221133
P0ADY7	rplP	LSU ribosomal protein L16p (L10e)	Cytoplasmic	0.118054	0.143874	0.152271	0.0697793	0.126685	0.0900389	0.0448513	0.328153	0.107252	0.0045953	0.00579715	0.00329414	0.00280703	0.00500532	0.00348513	0.00176073	0.00476354	0.00426797	0.825442	-0.276761	0.459097	0.788527	-0.342768	0.461152
P00370	gdhA	NADP-specific glutamate dehydrogenase (EC 1.4.1.4)	Cytoplasmic	0.0106077	0.0145162	0.0158301	0.00902201	0.00456811	0.0145069	0.014166	0.0326088	0.00658876	0.000412908	0.000584906	0.00034246	0.00036293	0.000180486	0.000561517	0.000556116	0.000473357	0.000262192	0.824409	-0.278568	0.587723	0.963732	-0.0532963	0.893462
P04805	gltX	Glutamyl-tRNA synthetase (EC 6.1.1.17)	Cytoplasmic	0.0196379	0.0207926	0.0399244	0.0227296	0.0146811	0.0136698	0.025405	0.103271	0.0225273	0.000764413	0.000837801	0.000863702	0.000914348	0.000580053	0.000529116	0.000997329	0.00149911	0.000896449	0.820594	-0.285259	0.346349	1.37591	0.46039	0.237222
P22259	pckA	Phosphoenolpyruvate carboxykinase [ATP] (EC 4.1.1.49)	Cytoplasmic	0.109854	0.0459454	0.136375	0.0605298	0.0775309	0.0503327	0.054041	0.237246	0.0733083	0.00427611	0.00185129	0.00295027	0.00243495	0.00306325	0.00194822	0.0021215	0.00344391	0.00291722	0.820301	-0.285774	0.534949	0.93445	-0.0978105	0.819576
P0AC33	fumA	Fumarate hydratase class I, aerobic (EC 4.2.1.2)	Inner Membrane	0.0605656	0.0756964	0.100481	0.0600321	0.041808	0.0553729	0.0497671	0.145557	0.0364902	0.00235754	0.00305005	0.00217375	0.00241493	0.00165184	0.00214332	0.00195371	0.00211294	0.00145208	0.819127	-0.287841	0.261222	0.727937	-0.458114	0.11345
P0AG67	rpsA	SSU ribosomal protein S1p	Cytoplasmic	0.237963	0.179243	0.367527	0.14403	0.159452	0.204604	0.181677	0.477051	0.20427	0.0092628	0.00722226	0.00795089	0.00579393	0.00629995	0.00791961	0.00713212	0.00692499	0.00812869	0.819018	-0.288032	0.168071	0.907916	-0.139369	0.356955
P0A858	tpiA	Triosephosphate isomerase (EC 5.3.1.1)	Inner Membrane	0.0361112	0.038081	0.100466	0.0313506	0.0386846	0.0359656	0.0327826	0.0768139	0.031775	0.00140564	0.00153441	0.00217343	0.00126115	0.00152843	0.00139212	0.00128695	0.00111505	0.00126445	0.817778	-0.290218	0.320417	0.717016	-0.479924	0.174038
P05459	pdxB	Erythronate-4-phosphate dehydrogenase (EC 1.1.1.290)	Cytoplasmic	0.00712128	0.00450866	0.00905666	0.00451406	0.00504122	0.00397534	0.0068273	0.0163541	0.00319095	0.000277198	0.000181668	0.000195927	0.000181588	0.000199179	0.000153873	0.000268021	0.0002374	0.00012698	0.816502	-0.292472	0.313046	0.965803	-0.0501998	0.893911
P0AB38	lpoB	Penicillin-binding protein activator LpoB (PBP activator LpoB) (Lipoprotein activator of PBP from the outer membrane B)	Outer Membrane		0.00291653	0.00779277		0.00247136	0.00350827					0.000117516	0.000168585		9.76435e-05	0.000135794				0.815929	-0.293485	0.501548
P21513	rne	Ribonuclease E (EC 3.1.26.12)	Inner Membrane	0.0160435	0.0197508	0.118952	0.033139	0.0202274	0.0289283	0.0236437	0.0573532	0.0192566	0.000624498	0.000795822	0.00257334	0.00133309	0.000799186	0.00111972	0.000928186	0.000832552	0.000766293	0.814291	-0.296384	0.733639	0.632761	-0.660268	0.515079
P07813	leuS	Leucine--tRNA ligase (EC 6.1.1.4) (Leucyl-tRNA synthetase) (LeuRS)	Cytoplasmic	0.0208622	0.0176562	0.0264406	0.00896395	0.0195977	0.0147319	0.0137113	0.0370088	0.00939381	0.00081207	0.000711423	0.000572	0.000360595	0.000774305	0.000570228	0.000538265	0.000537229	0.000373815	0.813712	-0.29741	0.411688	0.691631	-0.531925	0.0752469
P23538	ppsA	Phosphoenolpyruvate synthase (EC 2.7.9.2)	Inner Membrane	0.048757	0.044518	0.10403	0.0320592	0.0541026	0.0361438	0.0344233	0.0665805	0.0459323	0.00189788	0.00179377	0.00225052	0.00128965	0.0021376	0.00139902	0.00135136	0.000966497	0.00182782	0.812205	-0.300085	0.303073	0.69767	-0.519384	0.122695
P0AFC7	nuoB	NADH-ubiquinone oxidoreductase chain B (EC 1.6.5.3)	Inner Membrane	0.00911397	0.0128409	0.0254646	0.0111923	0.00530812	0.0127871	0.0063957	0.0215223	0.00991628	0.000354765	0.000517399	0.000550888	0.000450234	0.000209724	0.000494951	0.000251077	0.000312422	0.000394607	0.811572	-0.301209	0.4574	0.673276	-0.57073	0.111459
P68187	malK	Maltose/maltodextrin transport ATP-binding protein MalK (EC 3.6.3.19)	Inner Membrane		0.00278292	0.00309249	0.00112716		0.00258212					0.000112133	6.69012e-05	4.53423e-05		9.99458e-05				0.811512	-0.301317	0.682466
P77695	gnsB	Protein GnsB	Cytoplasmic	0.0070718	0.00299256	0.00234401	0.00442448	0.00327585	0.00141772	0.00205453	0.0123488	0.00294812	0.000275272	0.00012058	5.0709e-05	0.000177984	0.000129429	5.48754e-05	8.06552e-05	0.000179257	0.000117317	0.811286	-0.301717	0.733665	0.844743	-0.243416	0.772198
P0A903	bamC	Outer membrane protein NlpB, lipoprotein component of the protein assembly complex (forms a complex with YaeT, YfiO, and YfgL)	Outer Membrane	0.00322169	0.00814468	0.0113621	0.000515092	0.00648758	0.00750062				0.000125405	0.000328175	0.000245801	2.07207e-05	0.000256325	0.000290326				0.811247	-0.301788	0.69432	OFF	OFF
P37666	ghrB	2-ketoaldonate reductase, broad specificity (EC 1.1.1.215) (EC 1.1.1.-)	Cytoplasmic	0.00800966	0.00381036	0.00890131	0.00246299	0.00755031	0.00347691	0.00479675	0.037651	0.00317951	0.000311779	0.000153531	0.000192566	9.90792e-05	0.000298313	0.000134581	0.000188307	0.000546551	0.000126525	0.808622	-0.306463	0.619244	1.30934	0.388837	0.665464
P29680	hemE	Uroporphyrinogen decarboxylase (UPD) (URO-D) (EC 4.1.1.37)	Cytoplasmic	0.00444489	0.00408858	0.00525289	0.00234042	0.00431492	0.00259058	0.00340101	0.00481897	0.00288365	0.000173019	0.000164742	0.000113638	9.41486e-05	0.000170483	0.000100273	0.000133514	6.99532e-05	0.000114751	0.808387	-0.306883	0.404863	0.70496	-0.504386	0.16875
P0A6P9	eno	Enolase (EC 4.2.1.11)	Cytoplasmic	0.105903	0.095121	0.195902	0.0691346	0.0984053	0.0820983	0.106937	0.30765	0.11453	0.00412233	0.00383273	0.00423804	0.00278109	0.003888	0.00317777	0.00419806	0.00446591	0.00455759	0.807577	-0.308329	0.124336	1.08435	0.116828	0.102252
P0AE67	cheY	Chemotaxis regulator - transmits chemoreceptor signals to flagelllar motor components CheY	Cytoplasmic	0.0239837	0.0229016	0.0436071	0.0191469	0.0201823	0.0178592	0.0126998		0.039652	0.000933575	0.00092278	0.000943372	0.000770228	0.000797405	0.000691273	0.000498559		0.00157791	0.806831	-0.309662	0.0264269	1.1125	0.153805	0.87768
P0ACF8	hns	DNA-binding protein H-NS (Heat-stable nucleoid-structuring protein) (Histone-like protein HLP-II) (Protein B1) (Protein H1)	Cytoplasmic	0.224312	0.188078	0.710383	0.231662	0.222954	0.190654	0.226689	0.64621	0.385833	0.00873141	0.00757825	0.015368	0.00931912	0.00880892	0.00737964	0.00889916	0.00938052	0.0153538	0.805225	-0.312536	0.488762	1.06174	0.0864305	0.848459
P0ACE0	hybC	Uptake hydrogenase large subunit (EC 1.12.99.6)	Inner Membrane		0.0137866	0.00824268		0.00575046	0.00938184					0.000555506	0.000178318		0.000227201	0.000363142				0.804476	-0.313879	0.771271
P77258	nemA	N-ethylmaleimide reductase (EC 1.-.-.-) (N-ethylmaleimide reducing enzyme)	Cytoplasmic	0.00621598	0.00358876	0.00777529	0.0041107	0.00594486	0.0011793	0.00578379		0.00264248	0.000241959	0.000144603	0.000168206	0.000165362	0.000234882	4.56473e-05	0.000227055		0.000105154	0.803743	-0.315195	0.602001	0.898238	-0.15483	0.81478
P45578	luxS	S-ribosylhomocysteine lyase (EC 4.4.1.21)	Inner Membrane	0.0200507	0.010553	0.0181887	0.00897427	0.0124107	0.0109427	0.0128615	0.0408729	0.0137109	0.000780482	0.000425215	0.000393485	0.00036101	0.000490346	0.000423559	0.000504905	0.00059332	0.000545607	0.797229	-0.326933	0.480051	1.02792	0.0397292	0.91644
P76346	mtfA	Protein MtfA (Mlc titration factor A)	Inner Membrane	0.0114148	0.00320222	0.01242	0.00456011	0.00695074	0.00549658	0.0054175		0.0055633	0.000444325	0.000129028	0.000268687	0.000183441	0.000274624	0.000212756	0.000212676		0.000221385	0.796662	-0.32796	0.601325	0.773231	-0.371028	0.557639
P0AG07	rpe	Ribulose-phosphate 3-epimerase (EC 5.1.3.1)	Cytoplasmic	0.0120615	0.00145445	0.00971505	0.00205079	0.00778328		0.0051238		0.00278189	0.000469499	5.86043e-05	0.00021017	8.24977e-05	0.000307518		0.000201146		0.000110702	0.792421	-0.335661	0.777969	0.633602	-0.658351	0.541505
P0AFG3	sucA	2-oxoglutarate dehydrogenase E1 component (EC 1.2.4.2)	Inner Membrane	0.0819336	0.0900842	0.183332	0.0862298	0.062518	0.0669989	0.0376973	0.212567	0.071607	0.00318929	0.00362978	0.0039661	0.00346879	0.00247009	0.00259332	0.00147989	0.00308566	0.00284952	0.791104	-0.33806	0.13135	0.687525	-0.540517	0.140465
P21177	fadB	3-hydroxybutyryl-CoA epimerase (EC 5.1.2.3)	Inner Membrane	0.00912333	0.00818161	0.0120583	0.00802145	0.00773375	0.0029912	0.00377532	0.0187803	0.00747992	0.000355129	0.000329663	0.000260862	0.000322681	0.000305561	0.00011578	0.000148208	0.000272619	0.000297654	0.78678	-0.345967	0.42649	0.759772	-0.396361	0.248223
P07363	cheA	Signal transduction histidine kinase CheA (EC 2.7.3.-)	Inner Membrane	0.0266539	0.0308138	0.159642	0.0415142	0.0381296	0.0340314	0.0359877	0.087653	0.0469421	0.00103751	0.00124159	0.00345361	0.00167	0.0015065	0.00131725	0.00141277	0.00127239	0.00186801	0.783879	-0.351296	0.647923	0.794244	-0.332346	0.665349
P0A9P0	lpdA	Dihydrolipoamide dehydrogenase (EC 1.8.1.4)	Inner Membrane	0.124058	0.114842	0.302206	0.108081	0.118493	0.0898053	0.0858208	0.246589	0.108285	0.004829	0.00462734	0.00653776	0.00434778	0.00468167	0.00347609	0.00336908	0.00357955	0.00430909	0.781885	-0.354972	0.190327	0.703867	-0.506626	0.104413
P0ACX3	ydhR	Putative monooxygenase YdhR (EC 1.-.-.-)	Cytoplasmic	0.00990493	0.00827227	0.0121784	0.00167971	0.00961227	0.00827702	0.00377049	0.024527		0.000385553	0.000333316	0.000263461	6.75699e-05	0.000379781	0.000320378	0.000148019	0.000356039		0.781539	-0.355611	0.542106	0.769687	-0.377656	0.598273
P03023	lacI	Transcriptional repressor of the lac operon	Inner Membrane	0.389676	0.313154	0.693635	0.30608	0.225748	0.312885	0.339927	0.372585	0.323129	0.0151683	0.012618	0.0150057	0.0123128	0.00891933	0.0121108	0.0133446	0.00540853	0.0128585	0.779186	-0.35996	0.0888086	0.738729	-0.436883	0.281289
P39173	yeaD	Aldose 1-epimerase family protein YeaD	Cytoplasmic	0.019923	0.0155492	0.0170647	0.0112085	0.0128775	0.0108114	0.0179932	0.0538911	0.0162827	0.000775512	0.000626528	0.000369169	0.000450888	0.000508791	0.000418476	0.000706363	0.000782296	0.00064795	0.778088	-0.361995	0.385175	1.2063	0.270589	0.416454
P0AD24	yejL	UPF0352 protein YejL	Cytoplasmic	0.00793143		0.0237852		0.0103943	0.00592316				0.000308734		0.000514556		0.000410681	0.000229267				0.777306	-0.363445	0.573715
P0CE48	tufB	Translation elongation factor Tu	Inner Membrane	0.511355	0.398833	0.926262	0.320803	0.396373	0.38658	0.614042	1.41479	0.569634	0.0199047	0.0160702	0.0200382	0.012905	0.0156607	0.0149633	0.0241056	0.0205373	0.0226679	0.777121	-0.363788	0.0646767	1.2017	0.265072	0.0896344
P07330	cheB	Chemotaxis response regulator protein-glutamate methylesterase CheB (EC 3.1.1.61)	Cytoplasmic	0.00179949	0.00607667	0.0135765	0.000815068	0.00402611	0.0071922	0.00165581	0.00310761	0.003817	7.00459e-05	0.000244849	0.000293707	3.27879e-05	0.000159072	0.000278388	6.50025e-05	4.51108e-05	0.000151893	0.772669	-0.372078	0.663022	0.430505	-1.2159	0.226488
P37188	gatB	PTS system, galactitol-specific IIB component (EC 2.7.1.69)	Inner Membrane	0.0865267	0.0396408	0.0813924	0.0342951	0.0764583	0.0204668	0.027034	0.12664	0.0525051	0.00336808	0.00159726	0.0017608	0.0013796	0.00302087	0.000792208	0.00106128	0.00183834	0.00208938	0.772015	-0.373299	0.590878	0.741732	-0.43103	0.433001
P00956	ileS	Isoleucine--tRNA ligase (EC 6.1.1.5) (Isoleucyl-tRNA synthetase) (IleRS)	Cytoplasmic	0.0417021	0.0183437	0.0498923	0.0202797	0.0256143	0.0213962	0.022656	0.0759446	0.0284159	0.00162327	0.000739125	0.00107934	0.000815795	0.00101202	0.00082818	0.000889411	0.00110243	0.00113078	0.771703	-0.373882	0.417646	0.907279	-0.140381	0.725153
P76503	fadI	3-ketoacyl-CoA thiolase (EC 2.3.1.16)	Inner Membrane	0.00391483	0.00573368	0.00501493	0.00100114	0.00600652	0.00262805	0.000881156		0.0010612	0.000152386	0.000231028	0.00010849	4.02733e-05	0.000237318	0.000101724	3.45917e-05		4.22292e-05	0.771115	-0.374983	0.617734	0.234255	-2.09385	0.0711444
P76015	dhaK	Phosphoenolpyruvate-dihydroxyacetone phosphotransferase (EC 2.7.1.121), dihydroxyacetone binding subunit DhaK	Cytoplasmic	0.0151876	0.00426926	0.0103731	0.00563751	0.0110269	0.00254719	0.00414232		0.00521392	0.000591185	0.000172022	0.000224407	0.000226781	0.000435674	9.8594e-05	0.000162616		0.000207482	0.770594	-0.375956	0.671715	0.562109	-0.831079	0.388643
P20083	parE	Topoisomerase IV subunit B (EC 5.99.1.-)	Cytoplasmic	0.00182336	0.00495903	0.00387671	0.00229637	0.00289908	0.00171273	0.00320511		0.00358807	7.09748e-05	0.000199815	8.38665e-05	9.23767e-05	0.000114543	6.62944e-05	0.000125823		0.000142783	0.770362	-0.376392	0.583817	1.13606	0.184034	0.735116
P04036	dapB	4-hydroxy-tetrahydrodipicolinate reductase (EC 1.17.1.8)	Cytoplasmic	0.0039574		0.0162437	0.00268978	0.00840102	0.00369475				0.000154043		0.000351407	0.000108202	0.000331925	0.000143013				0.769135	-0.378691	0.676714
P22524	mukE	Chromosome partition protein MukE	Cytoplasmic	0.00867545		0.00992186		0.00545757	0.00539218	0.00353486		0.00578741	0.000337695		0.000214644		0.000215629	0.000208715	0.000138769		0.000230303	0.768266	-0.380322	0.487105	0.668197	-0.581654	0.363062
P0A6T5	folE	GTP cyclohydrolase I (EC 3.5.4.16) type 1	Cytoplasmic	0.00244142	0.00825047	0.00975201	0.00328009	0.00374343	0.00542105	0.00516998		0.0025103	9.50332e-05	0.000332438	0.00021097	0.000131949	0.000147903	0.000209832	0.000202959		9.98945e-05	0.767	-0.382701	0.552707	0.711546	-0.490971	0.525923
P08997	aceB	Malate synthase (EC 2.3.3.9)	Cytoplasmic	0.201923	0.131444	0.256094	0.117312	0.130774	0.113644	0.113829	0.249222	0.0823935	0.00785992	0.0052963	0.00554021	0.00471912	0.00516688	0.0043988	0.00446861	0.00361777	0.00327875	0.764039	-0.388281	0.208163	0.607877	-0.718148	0.0790592
P61889	mdh	Malate dehydrogenase (EC 1.1.1.37)	Inner Membrane	0.240412	0.157444	0.298673	0.177838	0.121508	0.127211	0.204206	0.576225	0.147805	0.00935813	0.00634394	0.00646133	0.00715392	0.00480078	0.00492394	0.00801655	0.00836461	0.00588171	0.761555	-0.39298	0.234966	1.00449	0.00646092	0.980247
P25553	aldA	Aldehyde dehydrogenase A (EC 1.2.1.22)	Cytoplasmic	0.31306	0.340397	0.692555	0.248939	0.27349	0.26625	0.301882	0.750506	0.251055	0.012186	0.0137157	0.0149824	0.0100141	0.0108056	0.0103057	0.011851	0.0108945	0.00999043	0.76131	-0.393444	0.0475202	0.800703	-0.320661	0.0573603
P0A7M2	rpmB	LSU ribosomal protein L28p	Cytoplasmic	0.0842378	0.0410952	0.0394988	0.0228484	0.0446992	0.0441438	0.0195813	0.124204	0.0456919	0.00327899	0.00165586	0.000854495	0.00091913	0.00176607	0.00170867	0.000768705	0.00180297	0.00181825	0.758958	-0.397908	0.591954	0.758278	-0.399201	0.599168
P0A805	frr	Ribosome recycling factor	Inner Membrane	0.0417664	0.0332976	0.0517546	0.0172998	0.0279205	0.033479	0.0321626	0.131695	0.0238873	0.00162577	0.00134167	0.00111963	0.000695924	0.00110314	0.00129587	0.00126261	0.00191171	0.000950566	0.757249	-0.40116	0.225588	1.00925	0.0132898	0.970934
P0ABH7	gltA	Citrate synthase (si) (EC 2.3.3.1)	Inner Membrane	0.229753	0.237582	0.415789	0.149251	0.153624	0.22175	0.177218	0.453816	0.13578	0.00894324	0.00957294	0.00899495	0.00600395	0.0060697	0.00858325	0.00695707	0.0065877	0.00540322	0.750856	-0.413392	0.107744	0.688739	-0.537971	0.0146243
P23524	garK	Glycerate-2-kinase (EC 2.7.1.165)	Cytoplasmic	0.00215132	0.000783881		0.00206398	0.000459896	0.000740088				8.37409e-05	3.15851e-05		8.30283e-05	1.81705e-05	2.86465e-05				0.750599	-0.413886	0.702095
P0A7I4	prfC	Peptide chain release factor 3	Cytoplasmic	0.00474384	0.00392189	0.00391943	0.00169346	0.00430361	0.0021178	0.00249968	0.0198574	0.00432063	0.000184656	0.000158026	8.47909e-05	6.81233e-05	0.000170036	8.19737e-05	9.81304e-05	0.000288255	0.000171934	0.748897	-0.41716	0.459112	1.30609	0.385259	0.536699
P0AC69	grxD	Probable monothiol glutaredoxin GrlA	Inner Membrane	0.0526774	0.0143712	0.0555252	0.0251498	0.032438	0.0148499	0.0206981	0.165513	0.0246251	0.00205049	0.000579062	0.0012012	0.00101171	0.00128163	0.000574793	0.00081255	0.00240262	0.000979925	0.748712	-0.417518	0.548398	1.09511	0.131077	0.863303
P0A7D7	purC	Phosphoribosylaminoimidazole-succinocarboxamide synthase (EC 6.3.2.6)	Inner Membrane	0.00305143	0.00301372	0.00944912	0.00248394	0.00372815	0.00220215	0.00249048		0.00102074	0.000118778	0.000121432	0.000204417	9.99221e-05	0.000147299	8.52386e-05	9.7769e-05		4.06192e-05	0.747727	-0.419416	0.338892	0.466868	-1.09891	0.155783
P00562	metL	Homoserine dehydrogenase (EC 1.1.1.3)	Inner Membrane		0.00125589	0.00434627	0.000951699	0.00157272	0.00158904	0.00236363		0.00633691		5.0604e-05	9.40247e-05	3.82842e-05	6.21384e-05	6.15067e-05	9.27895e-05		0.00025217	0.746414	-0.421952	0.548523	2.38514	1.25407	0.418467
P08956	hsdR	Type I restriction-modification system, restriction subunit R (EC 3.1.21.3)	Cytoplasmic	0.00180507	0.0267986	0.0135103	0.00859461	0.0101383	0.00849938	0.0157089	0.0202737	0.0032045	7.02631e-05	0.0010798	0.000292274	0.000345737	0.000400566	0.000328985	0.000616687	0.000294297	0.000127519	0.745516	-0.423688	0.728465	0.720013	-0.473905	0.718699
P0A9G6	aceA	Isocitrate lyase (EC 4.1.3.1)	Inner Membrane	0.347586	0.320059	0.725934	0.213197	0.325165	0.257051	0.244908	0.562519	0.25337	0.0135299	0.0128962	0.0157045	0.00857634	0.0128473	0.00994967	0.00961437	0.00816565	0.0100826	0.744668	-0.42533	0.0867056	0.661339	-0.596539	0.0132585
P77171	ydcI	LysR family transcriptional regulator YdcI	Cytoplasmic	0.00534982	0.0119855	0.0107688	0.00802671	0.00305725	0.00625558	0.00937746	0.00606707	0.00561647	0.000208244	0.000482933	0.000232965	0.000322892	0.000120792	0.000242134	0.000368132	8.80709e-05	0.000223501	0.742114	-0.430287	0.499292	0.735497	-0.443208	0.532404
P37906	puuB	Gamma-glutamyl-putrescine oxidase (EC1.4.3.-)	Cytoplasmic	0.0665298	0.00939959	0.0167985	0.00541895	0.0495537	0.00750762	0.00845888		0.0470515	0.0025897	0.00037874	0.000363409	0.000217989	0.00195787	0.000290597	0.000332072		0.00187236	0.740267	-0.433882	0.77351	0.992437	-0.0109527	0.994288
P0AF28	narL	Nitrate/nitrite response regulator protein	Cytoplasmic	0.00317034	0.0036514	0.00379505	0.00347565	0.00144625	0.00162266	0.00291378		0.00118407	0.000123406	0.000147127	8.21e-05	0.000139816	5.71413e-05	6.28081e-05	0.000114387		4.71185e-05	0.736643	-0.440962	0.403214	0.686997	-0.541625	0.45874
P0ABZ6	surA	Survival protein SurA precursor (Peptidyl-prolyl cis-trans isomerase SurA) (EC 5.2.1.8)	Periplasmic	0.00111601	0.00599114	0.0132553	0.00278776	0.00354723	0.00435114	0.00357545		0.00125474	4.34412e-05	0.000241402	0.000286757	0.000112144	0.000140151	0.000168419	0.000140362		4.99309e-05	0.736029	-0.442166	0.573052	0.499368	-1.00182	0.355916
P0A6A3	ackA	Acetate kinase (EC 2.7.2.1)	Inner Membrane	0.0679091	0.0285913	0.0771856	0.0182777	0.0651449	0.0180815	0.0315592	0.0721233	0.0381217	0.00264339	0.00115203	0.00166979	0.00073526	0.00257388	0.00069988	0.00123893	0.00104696	0.00151701	0.733552	-0.447028	0.560267	0.695836	-0.523181	0.332472
P0AB52	ychN	Protein YchN	Cytoplasmic	0.00329668		0.00765387		0.0027921	0.00269115				0.000128325		0.00016558		0.000110316	0.000104166				0.729769	-0.454488	0.272269
P0A959	alaA	Alanine transaminase (EC 2.6.1.2)	Cytoplasmic	0.00324293	0.00162418	0.00672634		0.00203527	0.00211268	0.0024879		0.000695027	0.000126232	6.54434e-05	0.000145514		8.04135e-05	8.17752e-05	9.76678e-05		2.76578e-05	0.721502	-0.470925	0.323961	0.557515	-0.842917	0.364957
P60293	mukF	Chromosome partition protein MukF	Cytoplasmic	0.0008457	0.00517197	0.00940591	0.0019192	0.00200835	0.00422887	0.00250427		0.0024426	3.29192e-05	0.000208395	0.000203482	7.72041e-05	7.935e-05	0.000163686	9.83106e-05		9.72004e-05	0.71997	-0.473991	0.565819	0.659327	-0.600934	0.473619
P0A9M5	gpt	Xanthine-guanine phosphoribosyltransferase (EC 2.4.2.22)	Inner Membrane	0.00744465	0.00394105	0.0119259	0.00385882		0.00473144	0.0158573		0.0054911	0.000289786	0.000158797	0.000257998	0.00015523		0.00018314	0.000622514		0.000218512	0.718324	-0.477294	0.230524	1.78541	0.836257	0.525099
P0A9Y6	cspC	Cold shock protein CspC	Cytoplasmic	0.229577	0.178724	0.419397	0.160821	0.193193	0.101191	0.21444	0.554205	0.147601	0.00893637	0.00720137	0.00907301	0.0064694	0.00763308	0.0039168	0.0084183	0.00804496	0.00587359	0.714746	-0.484498	0.148305	0.886005	-0.174613	0.394314
P60240	rapA	RNA polymerase-associated protein RapA (EC 3.6.4.-) (ATP-dependent helicase HepA)	Cytoplasmic	0.000820289	0.00755592	0.059665	0.00189802	0.0149924	0.0127106	0.029702	0.00847895	0.0155949	3.193e-05	0.000304452	0.00129076	7.63519e-05	0.000592351	0.000491988	0.00116602	0.000123082	0.000620582	0.713331	-0.487357	0.734949	1.17364	0.23099	0.856493
P0AGE9	sucD	Succinyl-CoA ligase [ADP-forming] alpha chain (EC 6.2.1.5)	Inner Membrane	0.213675	0.194577	0.344313	0.150198	0.135073	0.138711	0.167839	0.404028	0.106183	0.00831737	0.00784014	0.00744867	0.00604206	0.00533675	0.00536909	0.00658887	0.00586497	0.00422541	0.709471	-0.495184	0.00263444	0.706563	-0.50111	0.0671418
P0AB89	purB	Adenylosuccinate lyase (EC 4.3.2.2)	Inner Membrane	0.00877987	0.0128404	0.0163081	0.0120068	0.00449856	0.00499457	0.00916712	0.0289388	0.0115139	0.000341759	0.000517382	0.0003528	0.000483	0.000177738	0.000193324	0.000359875	0.000420082	0.000458182	0.704706	-0.504906	0.369535	1.02162	0.0308533	0.899602
P0ACJ8	crp	Cyclic AMP receptor protein	Cytoplasmic	0.0254691	0.0211342	0.0857816	0.0206575	0.0284765	0.0165625	0.0280613	0.128617	0.050706	0.000991394	0.000851563	0.00185575	0.000830994	0.00112511	0.000641083	0.00110161	0.00186703	0.00201778	0.702187	-0.510073	0.369986	1.34815	0.430983	0.368321
P06996	ompC	Outer membrane protein C (Outer membrane protein 1B) (Porin OmpC)	Outer Membrane	0.00078532	0.00601016	0.00931035	0.00286797	0.00381756	0.00166729	0.00669		0.00460531	3.05688e-05	0.000242169	0.000201415	0.00011537	0.000150832	6.45356e-05	0.00026263		0.000183263	0.697535	-0.519662	0.54809	1.4106	0.496309	0.456875
P0AD05	yecA	Uncharacterized protein YecA	Cytoplasmic	0.00538416		0.00455032		0.00227497	0.0032026				0.000209581		9.84391e-05		8.98843e-05	0.000123963				0.694264	-0.526443	0.548538
P0A8Y5	yidA	Sugar phosphatase YidA (EC 3.1.3.23)	Cytoplasmic	0.00437656		0.00381055	0.00314494	0.00198748	0.00147446				0.000170359		8.24353e-05	0.000126512	7.85253e-05	5.70717e-05				0.691231	-0.53276	0.53182
P05020	pyrC	Dihydroorotase (EC 3.5.2.3)	Cytoplasmic	0.0119523	0.00394337	0.0147155	0.00854683	0.00518334	0.00265375	0.00705059	0.0197343	0.00273266	0.000465248	0.000158891	0.000318347	0.000343815	0.000204794	0.000102718	0.000276786	0.000286468	0.000108743	0.691074	-0.533089	0.440238	0.713005	-0.488016	0.448605
P39831	ydfG	NADP-dependent 3-hydroxy acid dehydrogenase YdfG (L-allo-threonine dehydrogenase) (EC 1.1.1.381) (Malonic semialdehyde reductase) (EC 1.1.1.298)	Cytoplasmic	0.027238	0.0396809	0.0417368	0.00863063	0.0264641	0.0275199	0.00986309	0.0770253	0.0155304	0.00106025	0.00159887	0.00090291	0.000347186	0.0010456	0.00106521	0.000387197	0.00111812	0.000618014	0.690055	-0.535217	0.310323	0.596101	-0.746372	0.187011
P0ABS1	dksA	C4-type zinc finger protein, DksA/TraR family	Cytoplasmic	0.0686834	0.0234405	0.0914338	0.0062429	0.0557094	0.0359593	0.0374165	0.0798628	0.0403795	0.00267353	0.000944494	0.00197803	0.000251135	0.00220108	0.00139188	0.00146886	0.00115931	0.00160685	0.68693	-0.541765	0.483751	0.756788	-0.402038	0.46474
P28635	metQ	Methionine ABC transporter substrate-binding protein	Inner Membrane	0.00286585	0.00948501	0.0175523	0.00252308	0.00303294	0.00968295	0.00126705		0.00104319	0.000111554	0.000382181	0.000379717	0.000101497	0.000119832	0.000374797	4.97407e-05		4.15126e-05	0.682493	-0.551115	0.50344	0.156711	-2.67382	0.111481
P0AET8	hdhA	7-alpha-hydroxysteroid dehydrogenase (7-alpha-HSDH) (EC 1.1.1.159)	Cytoplasmic	0.00288211	0.000353238	0.00485953	0.00141854	0.00181061	0.000758145				0.000112187	1.42331e-05	0.000105128	5.70639e-05	7.15372e-05	2.93455e-05				0.682131	-0.55188	0.528609	OFF	OFF
P37051	purU	Formyltetrahydrofolate deformylase (EC 3.5.1.10)	Cytoplasmic	0.00152369	0.00268732	0.00566946	0.000677699	0.00250473	0.00184246				5.93101e-05	0.000108281	0.00012265	2.72619e-05	9.89621e-05	7.13158e-05				0.680606	-0.555107	0.337337	OFF	OFF
P76010	ycgR	Flagellar brake protein YcgR (Cyclic di-GMP binding protein YcgR)	Inner Membrane	0.0111977	0.00438598	0.0115747	0.00151033	0.00890944	0.00448749	0.00428496	0.0074006	0.00597921	0.000435873	0.000176725	0.000250401	6.07566e-05	0.000352013	0.000173697	0.000168215	0.000107429	0.000237936	0.679567	-0.557312	0.466637	0.59511	-0.748771	0.270546
P0A862	tpx	Thiol peroxidase, Tpx-type (EC 1.11.1.15)	Inner Membrane	0.219291	0.150475	0.38986	0.0832082	0.189277	0.124158	0.148806	0.415232	0.203132	0.00853597	0.00606311	0.00843403	0.00334723	0.00747834	0.00480578	0.00584168	0.0060276	0.00808339	0.678647	-0.559266	0.175479	0.86626	-0.207127	0.396635
P36683	acnB	2-methylisocitrate dehydratase (EC 4.2.1.99)	Inner Membrane	0.173593	0.161077	0.37518	0.147171	0.128142	0.0898342	0.0910413	0.239438	0.126308	0.00675719	0.00649029	0.00811644	0.00592028	0.00506289	0.00347721	0.00357402	0.00347574	0.00502628	0.67686	-0.563071	0.0650098	0.565254	-0.823028	0.0120857
P23865	prc	Tail-specific protease (EC 3.4.21.102) (C-terminal-processing peptidase) (PRC protein) (Protease Re)	Inner Membrane	0.00680485	0.00893222	0.0163063		0.0035545	0.00775453	0.00851378		0.00513463	0.000264881	0.000359908	0.000352761		0.000140439	0.000300154	0.000334227		0.000204327	0.676067	-0.564762	0.394939	0.826383	-0.275118	0.538461
P0A6B7	iscS	Cysteine desulfurase (EC 2.8.1.7), IscS subfamily	Inner Membrane	0.0417179	0.0418438	0.096139	0.0217635	0.0397994	0.0308344	0.0246748	0.0961492	0.0433352	0.00162388	0.00168602	0.00207982	0.000875486	0.00157248	0.00119351	0.000968664	0.00139572	0.00172447	0.675632	-0.56569	0.0848015	0.758641	-0.398511	0.183742
P0ADK8	yibL	Uncharacterized protein YibL	Cytoplasmic	0.00257539	0.00574345		0.00131691	0.00359882	0.0036409				0.000100248	0.000231422		5.29757e-05	0.000142189	0.000140928				0.675558	-0.565849	0.558652
P75914	ycdX	Probable phosphatase YcdX (EC 3.1.3.-)	Cytoplasmic	0.000971942	0.00280741			0.00108412	0.0015244				3.78332e-05	0.00011312			4.28338e-05	5.90048e-05				0.674639	-0.567813	0.631119
P0A836	sucC	Succinyl-CoA ligase [ADP-forming] beta chain (EC 6.2.1.5)	Inner Membrane	0.213779	0.208832	0.454108	0.180777	0.132192	0.139952	0.152377	0.590607	0.157328	0.00832144	0.00841453	0.00982392	0.00727214	0.00522292	0.0054171	0.00598188	0.00857338	0.00626069	0.674406	-0.56831	0.0273485	0.783736	-0.35156	0.131478
P52697	pgl	6-phosphogluconolactonase (EC 3.1.1.31)	Cytoplasmic	0.0106438	0.00555917	0.00773229	0.00253221	0.00866123	0.00254818	0.00483971		0.00567881	0.000414313	0.000223997	0.000167276	0.000101864	0.000342206	9.86323e-05	0.000189993		0.000225982	0.673674	-0.569878	0.470303	0.774546	-0.368578	0.506038
P76217	astD	Succinylglutamic semialdehyde dehydrogenase (EC 1.2.1.71)	Cytoplasmic	0.00264101	0.00167023	0.00126758	0.000385886	0.00126556	0.00173625	0.000554508		0.00123802	0.000102802	6.7299e-05	2.7422e-05	1.55231e-05	5.00022e-05	6.7205e-05	2.17684e-05		4.92656e-05	0.671973	-0.573525	0.466645	0.539435	-0.89048	0.324662
P04949	fliC	Flagellar biosynthesis protein FliC	Outer Membrane	0.400473	0.386537	0.610971	0.268686	0.250539	0.230631	0.215078	0.682593	0.413089	0.0155885	0.0155748	0.0132174	0.0108085	0.00989882	0.00892703	0.00844337	0.00990867	0.0164384	0.667729	-0.582666	0.00934402	0.783907	-0.351245	0.322562
P78061	puuA	Gamma-glutamyl-putrescine synthetase (EC 6.3.1.11)	Cytoplasmic	0.0117335	0.0117598	0.0437064	0.00811249	0.0146403	0.00858866	0.0143456		0.00780505	0.000456732	0.000473839	0.00094552	0.000326343	0.000578439	0.00033244	0.000563167		0.000310593	0.659468	-0.600625	0.322816	0.698601	-0.517459	0.424269
P33570	tktB	Transketolase (EC 2.2.1.1)	Inner Membrane	0.00855455	0.0129602	0.0324874	0.014003	0.0094315	0.00234474	0.00113049		0.00319641	0.000332989	0.000522207	0.000702814	0.0005633	0.000372639	9.07577e-05	4.438e-05		0.000127197	0.65898	-0.601694	0.369271	0.165189	-2.59781	0.0431499
P0AGD3	sodB	Superoxide dismutase [Fe] (EC 1.15.1.1)	Periplasmic	0.0549786	0.020939	0.0496971	0.0203501	0.0281194	0.0189061	0.0160102	0.167575	0.0496261	0.00214006	0.000843699	0.00107512	0.000818629	0.001111	0.000731796	0.000628515	0.00243256	0.00197481	0.655704	-0.608884	0.364331	1.24071	0.311165	0.655684
P0A9C5	glnA	Glutamine synthetase type I (EC 6.3.1.2)	Cytoplasmic	0.040675	0.037576	0.0583632	0.0129086	0.0247155	0.0350376	0.0117312	0.0618982	0.0239882	0.00158329	0.00151406	0.0012626	0.000519276	0.00097651	0.0013562	0.000460533	0.000898528	0.000954582	0.654133	-0.612344	0.162298	0.530659	-0.914144	0.0282486
P0AFD1	nuoE	NADH-ubiquinone oxidoreductase chain E (EC 1.6.5.3)	Inner Membrane	0.0138962	0.0101292	0.0509187		0.0109144	0.0119378	0.0104762	0.00540733	0.03181	0.000540913	0.000408136	0.00110155		0.000431228	0.000462074	0.000411267	7.8494e-05	0.00126584	0.653445	-0.613862	0.38092	0.856143	-0.224077	0.825746
P62707	gpmA	Phosphoglycerate mutase (EC 5.4.2.1)	Inner Membrane	0.0941955	0.0546464	0.114641	0.0345107	0.0487271	0.0545105	0.0587093	0.279063	0.0442549	0.00366659	0.00220188	0.00248008	0.00138827	0.00192521	0.00210993	0.00230476	0.00405094	0.00176107	0.649623	-0.622326	0.149213	0.972237	-0.04062	0.930499
P0ABU5	elbB	Glyoxalase ElbB (EC 4.2.1.-) (Sigma cross-reacting protein 27A) (SCRP-27A)	Cytoplasmic	0.00888585	0.00547349	0.00540437	0.00342115	0.00411715	0.00366264	0.00755439		0.0014025	0.000345885	0.000220544	0.000116915	0.000137623	0.000162669	0.000141769	0.000296564		5.58107e-05	0.646909	-0.628365	0.348093	0.773492	-0.370541	0.750533
P09546	putA	Proline dehydrogenase (EC 1.5.99.8) (Proline oxidase)	Cytoplasmic	0.0207518	0.0614842	0.124369	0.0369122	0.0378166	0.022785	0.0371958	0.0523759	0.0389906	0.000807771	0.0024774	0.00269054	0.00148488	0.00149414	0.000881936	0.0014602	0.0007603	0.00155159	0.646108	-0.630153	0.359775	0.631238	-0.663745	0.34652
P0A6R0	fabH	3-oxoacyl-[acyl-carrier-protein] synthase, KASIII (EC 2.3.1.180)	Cytoplasmic	0.0163241	0.0227749	0.0508679	0.0129115	0.0168001	0.0136455	0.0261139	0.0235036	0.0203651	0.000635422	0.000917673	0.00110045	0.000519395	0.000663772	0.000528177	0.00102516	0.000341183	0.000810407	0.644928	-0.632791	0.134753	0.820317	-0.285747	0.553703
P69783	crr	PTS system, glucose-specific IIA component	Inner Membrane	0.100815	0.074447	0.141966	0.0368714	0.0731115	0.0530653	0.10835	0.251292	0.0192452	0.00392427	0.00299971	0.00307121	0.00148323	0.00288864	0.00205399	0.00425352	0.00364781	0.000765838	0.642896	-0.637342	0.0840487	0.867134	-0.205674	0.725442
P00954	trpS	Tryptophanyl-tRNA synthetase (EC 6.1.1.2)	Cytoplasmic	0.005023	0.00417459	0.0114371	0.0032488	0.00377409	0.00289884	0.00506325	0.00596596	0.00809072	0.000195522	0.000168208	0.000247425	0.00013069	0.000149114	0.000112205	0.000198769	8.66032e-05	0.00032196	0.641425	-0.640648	0.0700083	0.993746	-0.00905064	0.987185
P0A9Q9	asd	Aspartate-semialdehyde dehydrogenase (EC 1.2.1.11)	Inner Membrane	0.0411508	0.0269206	0.0219455	0.00682933	0.0213493	0.0234715	0.012401	0.100687	0.0234535	0.00160181	0.00108472	0.000474756	0.000274725	0.000843511	0.000908511	0.000486828	0.0014616	0.000933302	0.641115	-0.641344	0.389481	0.911568	-0.133578	0.839485
P25539	ribD	5-amino-6-(5-phosphoribosylamino)uracil reductase (EC 1.1.1.193)	Cytoplasmic	0.0272214	0.00116337	0.000927525	0.0021203	0.014589	0.00145686	0.0136893		0.00538597	0.0010596	4.68757e-05	2.00656e-05	8.52937e-05	0.000576412	5.63905e-05	0.000537403		0.000214328	0.637433	-0.649655	0.745404	1.00093	0.00134776	0.999324
P0A8F0	upp	Uracil phosphoribosyltransferase (EC 2.4.2.9)	Cytoplasmic	0.031776	0.0266877	0.0704763	0.0225711	0.0171332	0.0221852	0.015587	0.0707892	0.018904	0.00123689	0.00107533	0.00152465	0.000907974	0.000676933	0.00085872	0.0006119	0.00102759	0.000752261	0.63688	-0.650906	0.0512853	0.623361	-0.681861	0.0552204
P67660	yhaJ	Probable HTH-type transcriptional regulator YhaJ	Cytoplasmic	0.00165396	0.00115425	0.118544	0.022895	0.0127039	0.00719109	0.0159787	0.0166885	0.0393855	6.43811e-05	4.65083e-05	0.00256451	0.000921	0.000501931	0.000278345	0.000627278	0.000242255	0.0015673	0.635897	-0.653135	0.738309	0.91083	-0.134746	0.937136
P23882	fmt	Methionyl-tRNA formyltransferase (EC 2.1.2.9)	Cytoplasmic	0.0103697	0.00753325	0.011358	0.00197149	0.00611926	0.00734156	0.00474639	0.00510652	0.00356434	0.000403644	0.000303539	0.000245713	7.93077e-05	0.000241772	0.000284169	0.00018633	7.41274e-05	0.000141839	0.635169	-0.654789	0.215718	0.422183	-1.24406	0.0366046
P0A853	tnaA	Tryptophanase (EC 4.1.99.1) (L-tryptophan indole-lyase) (TNase)	Cytoplasmic	0.608996	0.564927	1.15195	0.448613	0.327172	0.368373	0.55961	2.18939	0.551313	0.0237054	0.0227627	0.0249206	0.0180465	0.0129266	0.0142586	0.0219687	0.0317817	0.0219388	0.633597	-0.658363	0.0181782	1.06024	0.0843923	0.70667
P0AEE1	dcrB	Protein DcrB	Inner Membrane	0.00543958	0.0178477	0.0459472	0.00776289	0.00605409	0.0172058	0.00579306		0.0113054	0.000211738	0.000719142	0.000993997	0.000312279	0.000239197	0.000665985	0.000227419		0.000449887	0.632489	-0.660888	0.434422	0.527805	-0.921924	0.326768
P0A7K2	rplL	LSU ribosomal protein L7/L12 (P1/P2)	Cytoplasmic	0.141359	0.147883	0.207499	0.088556	0.0985549	0.0673603	0.0900835	0.617584	0.140134	0.00550246	0.00595868	0.00448891	0.00356236	0.00389391	0.00260731	0.00353642	0.00896499	0.00557647	0.630943	-0.664418	0.0284375	1.13341	0.180664	0.702898
P0AAI3	ftsH	ATP-dependent zinc metalloprotease FtsH (EC 3.4.24.-) (Cell division protease FtsH)	Inner Membrane	0.00247596	0.00332172	0.0104804	0.00253061	0.00225659	0.00249443	0.00154964		0.00381361	9.63778e-05	0.000133843	0.000226727	0.000101799	8.9158e-05	9.65516e-05	6.08346e-05		0.000151758	0.629194	-0.668423	0.281755	0.697867	-0.518975	0.510762
P37903	uspF	Universal stress protein F	Cytoplasmic	0.022256	0.0264814	0.0257338	0.00468829	0.0240643	0.0110243	0.00975038	0.0418374	0.0125674	0.000866323	0.00106702	0.00055671	0.000188597	0.000950781	0.000426717	0.000382772	0.000607321	0.000500105	0.62894	-0.669006	0.326171	0.59846	-0.740673	0.140513
P77581	astC	Succinylornithine transaminase (EC 2.6.1.81)	Cytoplasmic	0.0189167	0.01227	0.0175452	0.00822739	0.00832102	0.00909969	0.00295806		0.0043815	0.000736338	0.000494398	0.000379562	0.000330965	0.000328764	0.000352221	0.000116125		0.000174356	0.628424	-0.67019	0.197747	0.270585	-1.88585	0.0567415
P76149	sad	Succinate semialdehyde dehydrogenase [NAD(P)+] Sad (SSADH) (SSDH) (EC 1.2.1.16)	Cytoplasmic	0.00308659	0.000526246	0.00227802	0.00171435		0.000279215				0.000120147	2.12041e-05	4.92814e-05	6.89637e-05		1.08076e-05				0.627685	-0.671887	0.611758	OFF	OFF
P08200	icd	Isocitrate dehydrogenase [NADP] (EC 1.1.1.42)	Inner Membrane	0.264412	0.173266	0.290419	0.134684	0.153536	0.0852028	0.154794	0.622694	0.147497	0.0102923	0.00698144	0.00628276	0.00541797	0.00606623	0.00329794	0.00607676	0.00903917	0.00586946	0.627518	-0.672271	0.131426	0.890853	-0.166741	0.622668
P0AC62	grxC	Glutaredoxin 3 (Grx3)	Inner Membrane	0.024587	0.0176939	0.0229767	0.0118124	0.015968	0.00642632	0.0239335	0.0401591	0.0168038	0.000957059	0.000712946	0.000497065	0.000475178	0.000630897	0.000248743	0.000939561	0.000582958	0.000668688	0.625184	-0.677646	0.195072	1.01114	0.01598	0.9648
P0A9T0	serA	D-3-phosphoglycerate dehydrogenase (EC 1.1.1.95)	Cytoplasmic	0.00556776	0.00646966	0.0135553	0.00166067	0.00807555	0.0024541	0.00281047	0.013004	0.00387273	0.000216727	0.000260683	0.000293247	6.68041e-05	0.000319066	9.49905e-05	0.000110331	0.000188769	0.000154111	0.623961	-0.680472	0.349875	0.588084	-0.765906	0.0289878
P0AF36	zapB	Cell division protein ZapB	Inner Membrane	0.0805767	0.0481448	0.231662	0.0441718	0.0711503	0.0440667	0.0597704	0.0725891	0.111253	0.00313648	0.00193991	0.00501166	0.00177691	0.00281115	0.00170569	0.00234642	0.00105372	0.00442718	0.623882	-0.680655	0.292001	0.7759	-0.366057	0.601105
P22256	gabT	Gamma-aminobutyrate:alpha-ketoglutarate aminotransferase (EC 2.6.1.19)	Inner Membrane	0.00668641	0.00168568	0.00672607	0.00215578	0.0042828	0.0010166				0.000260271	6.79216e-05	0.000145508	8.67211e-05	0.000169214	3.93495e-05				0.623356	-0.681871	0.434524	OFF	OFF
P0AE08	ahpC	Alkyl hydroperoxide reductase protein C (EC 1.6.4.-)	Inner Membrane	0.45072	0.465727	0.845227	0.274973	0.25665	0.326964	0.338624	0.974446	0.405986	0.0175445	0.0187656	0.0182852	0.0110614	0.0101403	0.0126558	0.0132934	0.0141453	0.0161557	0.620154	-0.689302	0.00399348	0.798502	-0.324632	0.0347284
P0A744	msrA	Peptide methionine sulfoxide reductase MsrA (EC 1.8.4.11)	Cytoplasmic	0.00573659	0.00750011		0.0027102	0.00506765	0.00457415	0.00527545		0.00263728	0.000223299	0.000302203		0.000109024	0.000200223	0.000177051	0.000207099		0.000104947	0.616931	-0.696818	0.173191	0.593807	-0.751935	0.247803
P17854	cysH	Phosphoadenylyl-sulfate reductase [thioredoxin] (EC 1.8.4.8)	Inner Membrane	0.00204076	0.00119793	0.0063641	0.00250609	0.00125129	0.000321295	0.00274072		0.00208674	7.94373e-05	4.82684e-05	0.000137677	0.000100813	4.94385e-05	1.24364e-05	0.000107593		8.30395e-05	0.613031	-0.705968	0.403182	1.07749	0.107681	0.829463
P0A6T9	gcvH	Glycine cleavage system H protein	Cytoplasmic	0.0341652	0.0343765	0.0780907	0.0374889	0.00899967	0.0212788	0.0347661	0.0710675	0.0409067	0.00132989	0.00138514	0.00168937	0.00150807	0.000355577	0.000823638	0.00136482	0.00103163	0.00162783	0.610137	-0.712796	0.223444	0.913696	-0.130215	0.576156
P00448	sodA	Manganese superoxide dismutase (EC 1.15.1.1)	Periplasmic	0.0664666	0.018295	0.0795394	0.0330055	0.0266064	0.0178493	0.0256385	0.113986	0.0612286	0.00258724	0.000737162	0.00172071	0.00132772	0.00105122	0.00069089	0.00100649	0.00165464	0.00243652	0.608477	-0.716726	0.34427	1.01041	0.0149477	0.980635
P14407	fumB	Fumarate hydratase class I, anaerobic (EC 4.2.1.2)	Cytoplasmic	0.00575855	0.00498182	0.0140239	0.00246005	0.00493162	0.00374368				0.000224154	0.000200734	0.000303386	9.89609e-05	0.000194849	0.000144906				0.602406	-0.731193	0.0820258	OFF	OFF
P22523	mukB	Chromosome partition protein MukB	Cytoplasmic	0.0123604	0.00777231	0.0319587	0.010845	0.00611391	0.00559651	0.00822171	0.012505	0.00720347	0.000481135	0.000313171	0.000691377	0.000436263	0.000241561	0.000216624	0.000322761	0.000181526	0.000286653	0.602045	-0.732058	0.215405	0.532374	-0.909487	0.157399
P42593	fadH	2,4-dienoyl-CoA reductase [NADPH] (EC 1.3.1.34)	Cytoplasmic	0.00700693	0.00214697	0.0119126	0.00311043	0.0030409	0.00310389	0.00178471	0.00701253	0.00180757	0.000272747	8.65083e-05	0.000257711	0.000125124	0.000120146	0.000120142	7.00627e-05	0.000101795	7.19301e-05	0.592272	-0.755668	0.295469	0.39514	-1.33956	0.16939
P0ABQ2	garR	2-hydroxy-3-oxopropionate reductase (EC 1.1.1.60)	Cytoplasmic	0.0174024	0.022425	0.0215141	0.0112215	0.0100649	0.00928685	0.00900685	0.153734	0.0155827	0.000677394	0.000903575	0.000465425	0.000451409	0.000397664	0.000359466	0.000353583	0.00223164	0.000620094	0.59057	-0.75982	0.15289	1.56633	0.647384	0.580786
P76104	ydcP	Uncharacterized protease YdcP (EC 3.4.-.-)	Cytoplasmic		0.00358593	0.00332039	0.000567415	0.0026522						0.000144489	7.18314e-05	2.28255e-05	0.000104789					0.589933	-0.761378	0.504108
P37349	dhaM	DHA-specific EI component	Inner Membrane	0.00523675	0.00406299	0.00566954	0.000758864	0.00394552	0.00263327	0.0025766		0.00256241	0.000203842	0.000163711	0.000122652	3.0527e-05	0.000155888	0.000101926	0.00010115		0.000101968	0.588204	-0.765613	0.206206	0.62153	-0.686104	0.118575
P0AE06	acrA	RND efflux system, membrane fusion protein CmeA	Inner Membrane	0.00350884	0.0124227	0.0227763	0.00430058	0.00217928	0.0104557	0.00552528	0.00934135	0.0057253	0.000136583	0.000500549	0.000492731	0.000173	8.61034e-05	0.000404707	0.000216907	0.000135601	0.000227832	0.587514	-0.767305	0.370524	0.513637	-0.961179	0.263697
P0AGD7	ffh	Signal recognition particle, subunit Ffh SRP54 (TC 3.A.5.1.1)	Inner Membrane	0.0175551	0.0102719	0.010595	0.00737647	0.00727103	0.00497044	0.00253351	0.0255138	0.00462643	0.000683338	0.000413887	0.000229207	0.000296735	0.000287279	0.00019239	9.94585e-05	0.000370364	0.000184103	0.585332	-0.772672	0.297074	0.492996	-1.02035	0.234162
P04951	kdsB	3-deoxy-manno-octulosonate cytidylyltransferase (EC 2.7.7.38)	Cytoplasmic	0.00389735		0.0120214		0.00380961	0.00233032				0.000151706		0.000260064		0.000150518	9.01997e-05				0.584592	-0.774497	0.332062
P0AE52	bcp	Thiol peroxidase, Bcp-type (EC 1.11.1.15)	Cytoplasmic	0.0208406	0.0201807	0.110887	0.0139782	0.0335946	0.0114777	0.0194193	0.0561665	0.0161613	0.000811226	0.000813145	0.00239887	0.000562306	0.00132733	0.000444268	0.000762345	0.000815326	0.00064312	0.580104	-0.785616	0.414706	0.55199	-0.857285	0.373691
P27550	acs	Acetyl-coenzyme A synthetase (EC 6.2.1.1)	Inner Membrane	0.0610025	0.0518093	0.0622873	0.0375749	0.023736	0.0234767	0.0412166	0.0986537	0.0265025	0.00237454	0.00208756	0.00134749	0.00151153	0.000937812	0.000908712	0.00161805	0.00143208	0.00105464	0.578019	-0.790811	0.0994755	0.706549	-0.501138	0.198562
P0AAB6	galF	UTP--glucose-1-phosphate uridylyltransferase (EC 2.7.7.9)	Cytoplasmic	0.020594	0.00374545	0.0289411	0.000794772	0.0207581	0.00142443	0.00115639	0.0582963	0.0102644	0.000801627	0.000150916	0.000626096	3.19714e-05	0.000820154	5.51352e-05	4.53965e-05	0.000846242	0.000408461	0.57471	-0.799093	0.530248	0.823557	-0.28006	0.774497
P0A910	ompA	Outer membrane protein A precursor	Outer Membrane	0.070912	0.153146	0.303059	0.0524168	0.0442688	0.128563	0.0724354	0.0682626	0.133727	0.00276027	0.00617076	0.0065562	0.00210858	0.00174906	0.00497628	0.00284361	0.000990916	0.0053215	0.5704	-0.809953	0.235021	0.591198	-0.758287	0.292071
P21151	fadA	Acetyl-CoA acetyltransferase (EC 2.3.1.9)	Cytoplasmic	0.0167766	0.0193726	0.0238147	0.007077	0.0155704	0.00527815	0.00999007	0.0166967	0.00640446	0.000653034	0.000780583	0.000515193	0.000284688	0.000615189	0.000204301	0.000392182	0.000242373	0.000254858	0.566591	-0.819621	0.143241	0.456388	-1.13167	0.0242334
P51024	yaiL	Uncharacterized protein YaiL	Cytoplasmic	0.0116054	0.00317223	0.0018491	0.00226909	0.00407216	0.00247363				0.000451743	0.000127819	4.00024e-05	9.12793e-05	0.000160891	9.57466e-05				0.561551	-0.832512	0.546483	OFF	OFF
P0AF93	ridA	2-iminobutanoate/2-iminopropanoate deaminase (EC 3.5.99.10)	Inner Membrane	0.0922145	0.0807347	0.115826	0.042993	0.0551127	0.0337203	0.0765428	0.0847086	0.054665	0.00358948	0.00325306	0.00250571	0.00172949	0.00217751	0.00130521	0.00300485	0.00122965	0.00217533	0.557559	-0.842804	0.0300973	0.685671	-0.544411	0.194039
P0ACA3	sspA	Stringent starvation protein A	Cytoplasmic	0.0295879	0.0116652	0.0366383	0.00498294	0.0152324	0.0139644	0.0256594	0.077072	0.0424317	0.00115172	0.000470026	0.000792612	0.00020045	0.000601833	0.000540521	0.00100731	0.00111879	0.00168852	0.556174	-0.846391	0.212804	1.57998	0.659903	0.181405
P25522	mnmE	GTPase and tRNA-U34 5-formylation enzyme TrmE	Inner Membrane	0.000808764	0.00173261	0.0142539	0.00269873	0.00157661	0.00138552				3.14814e-05	6.98123e-05	0.000308361	0.000108562	6.2292e-05	5.36294e-05				0.547982	-0.867799	0.552223	OFF	OFF
P0A9J8	pheA	Chorismate mutase I (EC 5.4.99.5)	Cytoplasmic	0.0127343	0.00110109	0.0257052	0.00242747	0.00108756	0.0118281				0.000495687	4.43665e-05	0.000556093	9.76504e-05	4.29695e-05	0.000457829				0.545956	-0.873142	0.470403	OFF	OFF
P08506	dacC	D-alanyl-D-alanine carboxypeptidase (EC 3.4.16.4)	Inner Membrane	0.00174625		0.00423353	0.000929589	0.0010249	0.00135546				6.79733e-05		9.15858e-05	3.73948e-05	4.04937e-05	5.24656e-05				0.544643	-0.876617	0.163489
P0AC41	sdhA	Succinate dehydrogenase flavoprotein subunit (EC 1.3.99.1)	Inner Membrane	0.0403836	0.0643245	0.113786	0.0282534	0.0264701	0.0366792	0.0207117	0.0992636	0.0384404	0.00157195	0.00259184	0.00246159	0.00113656	0.00104584	0.00141974	0.000813084	0.00144093	0.00152969	0.543688	-0.87915	0.0747641	0.571093	-0.808202	0.0802848
P31142	sseA	3-mercaptopyruvate sulfurtransferase (MST) (EC 2.8.1.2) (Rhodanese-like protein)	Cytoplasmic	0.0282931	0.00730325	0.0412427	0.00697465	0.0106695	0.0136307	0.0111548	0.0427955	0.0111142	0.00110132	0.000294271	0.000892222	0.000280571	0.000421552	0.000527604	0.000437907	0.000621228	0.000442278	0.537512	-0.895631	0.279413	0.656266	-0.607646	0.392678
P64490	yoaC	Uncharacterized protein YoaC	Cytoplasmic	0.000956229	0.000624014			0.000636638	0.000214551				3.72216e-05	2.51435e-05			2.51536e-05	8.30459e-06				0.536489	-0.898379	0.309536
P0A8M3	thrS	Threonyl-tRNA synthetase (EC 6.1.1.3)	Inner Membrane	0.05954	0.0311742	0.0477017	0.0220176	0.0193122	0.0211664	0.0332355	0.0570076	0.0228538	0.00231762	0.00125611	0.00103195	0.000885707	0.000763028	0.000819288	0.00130473	0.000827535	0.000909438	0.535865	-0.900058	0.213372	0.660425	-0.598533	0.319526
P45523	fkpA	FKBP-type peptidyl-prolyl cis-trans isomerase FkpA precursor (EC 5.2.1.8)	Periplasmic	0.00804908	0.0169874	0.0286236	0.00158818	0.0139953	0.00635024	0.0042915	0.0183123	0.0079242	0.000313313	0.000684475	0.000619227	6.38881e-05	0.000552954	0.000245798	0.000168472	0.000265825	0.000315334	0.533477	-0.906502	0.244345	0.463589	-1.10908	0.113963
P27306	sthA	Soluble pyridine nucleotide transhydrogenase (EC 1.6.1.1)	Inner Membrane	0.0309479	0.018049	0.0525731	0.00651058	0.0239021	0.0109964	0.0211508	0.0198024	0.0190159	0.00120466	0.000727252	0.00113734	0.000261902	0.000944373	0.000425636	0.00083032	0.000287456	0.000756715	0.531697	-0.911324	0.1393	0.610733	-0.711387	0.154306
P76621	csiD	Protein CsiD	Cytoplasmic	0.00872516	0.00761901	0.0157082	0.00487368	0.00369377	0.00458881	0.00243288		0.00186053	0.00033963	0.000306994	0.000339823	0.000196055	0.000145941	0.000177619	9.55078e-05		7.40377e-05	0.526753	-0.924801	0.00145943	0.257812	-1.95561	0.000958068
P0A968	cspD	Cold shock protein CspD	Cytoplasmic	0.0207866	0.0201339	0.0599946	0.00856606	0.0139441	0.0161208	0.0230557	0.0290667	0.0337987	0.000809126	0.000811259	0.00129789	0.000344589	0.000550933	0.000623988	0.0009051	0.000421939	0.00134498	0.520687	-0.941511	0.0842095	0.915616	-0.127186	0.808162
P0AFI2	parC	Topoisomerase IV subunit A (EC 5.99.1.-)	Cytoplasmic	0.000986559	0.00421275	0.123908	0.00714161	0.0251036	0.00526714	0.00474508	0.00472382	0.00458372	3.84021e-05	0.000169745	0.00268056	0.000287287	0.000991845	0.000203875	0.000186278	6.8572e-05	0.000182404	0.51338	-0.9619	0.646188	0.151367	-2.72388	0.442202
P24171	dcp	Dipeptidyl carboxypeptidase Dcp (EC 3.4.15.5)	Cytoplasmic	0.00379863	0.0144265	0.00724685	0.00265922	0.00522024	0.00351311	0.00555329	0.00596643	0.00404362	0.000147863	0.00058129	0.000156774	0.000106973	0.000206252	0.000135982	0.000218007	8.661e-05	0.000160911	0.507047	-0.979809	0.41672	0.525469	-0.928322	0.432843
P75849	gloC	Hydroxyacylglutathione hydrolase GloC (EC 3.1.2.6) (Accessory type II glyoxalase) (Glyoxalase II 2) (GlxII-2)	Cytoplasmic	0.0107928	0.00258715	0.00804931	0.00328451	0.00383302	0.00166223	0.00535387		0.0265443	0.000420113	0.000104245	0.000174134	0.000132127	0.000151443	6.434e-05	0.000210178		0.0010563	0.498087	-1.00553	0.346799	2.71974	1.44347	0.513509
P0A6F1	carA	Carbamoyl-phosphate synthase small chain (EC 6.3.5.5)	Inner Membrane	0.0251746	0.0371976	0.0751272	0.00528022	0.010587	0.0356798	0.0662444	0.0209696	0.0107342	0.000979929	0.00149881	0.00162526	0.000212409	0.000418292	0.00138106	0.00260057	0.000304399	0.000427153	0.490194	-1.02857	0.185059	0.81192	-0.300591	0.766977
P23827	eco	Ecotin	Periplasmic		0.00184614	0.00220026		0.0011512	0.00036308					7.4387e-05	4.75993e-05		4.54839e-05	1.40537e-05				0.488068	-1.03485	0.272615
P76270	msrC	Free methionine-R-sulfoxide reductase (fRMsr) (EC 1.8.4.14)	Cytoplasmic	0.00100079		0.00256311		0.000786609	0.000385287	0.00228669		0.00370611	3.8956e-05		5.5449e-05		3.1079e-05	1.49133e-05	8.9769e-05		0.00014748	0.48718	-1.03747	0.171058	2.5131	1.32947	0.224353
P07014	sdhB	Succinate dehydrogenase iron-sulfur protein (EC 1.3.99.1)	Inner Membrane	0.012762	0.024106	0.0655284	0.00648885	0.0109725	0.0181736	0.00476223	0.0139443	0.020757	0.000496764	0.000971309	0.00141761	0.000261028	0.000433525	0.000703443	0.000186951	0.000202418	0.000826002	0.48446	-1.04555	0.19528	0.421174	-1.24751	0.179688
P0AFI7	pdxH	Pyridoxamine 5'-phosphate oxidase (EC 1.4.3.5)	Inner Membrane	0.00638955	0.0033431	0.00699573		0.00298126	0.00141779	0.0016429		0.00225676	0.000248716	0.000134704	0.000151342		0.00011779	5.48783e-05	6.44954e-05		8.9805e-05	0.484331	-1.04593	0.152859	0.432811	-1.20819	0.0929202
P07118	valS	Valine--tRNA ligase (EC 6.1.1.9) (Valyl-tRNA synthetase) (ValRS)	Cytoplasmic	0.0844072	0.0164974	0.0612013	0.0227293	0.0252604	0.016319	0.0222382	0.109879	0.0155654	0.00328558	0.000664732	0.00132399	0.000914336	0.00099804	0.000631657	0.000873009	0.00159503	0.000619406	0.482345	-1.05186	0.366892	0.585374	-0.772569	0.459463
P0A6A8	acpP	Acyl carrier protein	Inner Membrane	0.100375	0.108018	0.121497	0.0305022	0.0540068	0.0478933	0.0733311	0.34923	0.0803288	0.00390713	0.00435238	0.0026284	0.00122702	0.00213381	0.0018538	0.00287877	0.0050695	0.00319659	0.478938	-1.06209	0.0474447	1.0236	0.033652	0.925519
P0AG90	secD	Protein translocase subunit SecD	Inner Membrane		0.0295262	0.00639108	0.0094272		0.00622504					0.0011897	0.000138261	0.00037923		0.000240952				0.467017	-1.09845	0.622294
P0ADR8	ygdH	LOG family protein YgdH	Cytoplasmic	0.00850935	0.0216066	0.0690463	0.0108378	0.0118716	0.00899828	0.00962466		0.0087462	0.00033123	0.0008706	0.00149371	0.000435976	0.000469047	0.000348296	0.000377837		0.000348044	0.46496	-1.10482	0.288048	0.403935	-1.30781	0.251693
P08244	pyrF	Orotidine 5'-phosphate decarboxylase (EC 4.1.1.23)	Cytoplasmic	0.00626019	0.00587461	0.00810857	0.00146005	0.00379669	0.00227467	0.00431617		0.00453265	0.00024368	0.000236707	0.000175416	5.87339e-05	0.000150008	8.80453e-05	0.000169441		0.000180371	0.452554	-1.14384	0.0276251	0.800115	-0.321721	0.175902
P00805	ansB	L-asparaginase (EC 3.5.1.1)	Periplasmic	0.0212833	0.0242019	0.0206367	0.00809415	0.00691233	0.0107717	0.0167331		0.00412816	0.000828459	0.000975174	0.000446443	0.000325605	0.000273107	0.00041694	0.000656895		0.000164275	0.451386	-1.14757	0.112281	0.547428	-0.869258	0.374691
P76143	lsrF	Autoinducer 2 (AI-2) aldolase LsrF (EC 4.2.1.-)	Cytoplasmic	0.00898539	0.00533076	0.00643049	0.000796319	0.00287208	0.00441185	0.000946511		0.000391024	0.000349759	0.000214793	0.000139114	3.20337e-05	0.000113476	0.000170769	3.71573e-05		1.55603e-05	0.449473	-1.15369	0.165616	0.112378	-3.15357	0.0734732
P0A912	pal	Peptidoglycan-associated lipoprotein precursor	Outer Membrane	0.00896576	0.0193473	0.0291414	0.00529972	0.00428557	0.0105281	0.0177313	0.00717195		0.000348995	0.000779566	0.00063043	0.000213193	0.000169323	0.000407512	0.000696079	0.00010411		0.449137	-1.15477	0.107928	0.68237	-0.551374	0.64317
P03841	malM	Maltose operon periplasmic protein MalM	Periplasmic	0.00356182	0.0086855	0.0181236	0.0017473	0.00321046	0.00509474	0.00248496		0.00299702	0.000138645	0.000349967	0.000392075	7.02892e-05	0.000126845	0.000197202	9.75525e-05		0.000119263	0.44776	-1.1592	0.163127	0.369283	-1.4372	0.139628
P07018	tap	Methyl-accepting chemotaxis protein IV (dipeptide chemoreceptor protein)	Inner Membrane	0.00180213	0.0111974	0.0185038	0.00276639	0.00408817	0.0036037	0.0047912		0.00539579	7.01485e-05	0.000451181	0.0004003	0.000111284	0.000161524	0.000139488	0.000188089		0.000214719	0.447355	-1.16051	0.290344	0.655591	-0.609133	0.469566
P0AEM0	fkpB	FKBP-type peptidyl-prolyl cis-trans isomerase slpA (EC 5.2.1.8)	Cytoplasmic	0.0101581		0.00562168	0.00115373	0.00464419					0.000395407		0.000121616	4.64114e-05	0.000183492					0.444668	-1.1692	0.476212
P0AFB8	glnG	Nitrogen regulation protein NR(I)	Cytoplasmic	0.00338126	0.000937352	0.00303014		0.00131739	0.000449722				0.000131617	3.77689e-05	6.55524e-05		5.20502e-05	1.74074e-05				0.443462	-1.17312	0.276835	OFF	OFF
P0AEI4	rimO	Ribosomal protein S12p Asp88 (E. coli) methylthiotransferase	Cytoplasmic	0.00409852	0.00536683	0.0113331	0.0018865	0.00231611	0.00278357	0.0355887	0.00767054	0.00114821	0.000159536	0.000216247	0.000245175	7.58888e-05	9.15098e-05	0.000107743	0.00139711	0.000111347	4.56916e-05	0.443093	-1.17432	0.0324407	2.50283	1.32356	0.552979
P39267	yjcZ	Uncharacterized protein YjcZ	Cytoplasmic	0.000549677	0.00129239	0.000311151		0.000266374	0.000326324	0.000943966		0.00086369	2.13964e-05	5.20745e-05	6.73127e-06		1.05245e-05	1.2631e-05	3.70574e-05		3.43695e-05	0.433071	-1.20733	0.374189	1.33588	0.41779	0.571295
P60560	guaC	GMP reductase (EC 1.7.1.7)	Cytoplasmic	0.00778488	0.00654382	0.00692077		0.00124747	0.00395253	0.00333458		0.00176305	0.000303029	0.000263671	0.00014972		4.92878e-05	0.00015299	0.000130906		7.01586e-05	0.423518	-1.2395	0.16197	0.420978	-1.24818	0.0872946
P37329	modA	Molybdenum ABC transporter, periplasmic molybdenum-binding protein ModA (TC 3.A.1.8.1)	Periplasmic	0.00734402	0.0229169	0.00112869		0.00850928	0.000296723				0.000285868	0.000923395	2.44175e-05		0.000336202	1.14852e-05				0.422744	-1.24214	0.503586	OFF	OFF
P19926	agp	Glucose-1-phosphatase (G1Pase) (EC 3.1.3.10)	Periplasmic	0.00376262	0.00438158	0.0224512	0.00242813	0.00234031	0.0038706	0.00176115		0.00120715	0.000146461	0.000176548	0.000485696	9.76768e-05	9.2466e-05	0.000149819	6.91376e-05		4.80372e-05	0.420378	-1.25024	0.284871	0.217338	-2.20199	0.190002
P0AEX9	malE	Maltose/maltodextrin ABC transporter, substrate binding periplasmic protein MalE	Periplasmic	0.0186165	0.0284932	0.0569673	0.00651775	0.0162802	0.0102893	0.0151211	0.0244384	0.0210974	0.000724653	0.00114808	0.0012324	0.000262191	0.00064323	0.000398268	0.000593612	0.000354753	0.000839546	0.419849	-1.25206	0.040995	0.575792	-0.796381	0.106114
P02942	tsr	Methyl-accepting chemotaxis protein I (serine chemoreceptor protein)	Inner Membrane	0.00233337	0.0213824	0.0566555	0.0043382	0.00329928	0.0155974	0.00962106	0.00275395	0.0184346	9.08272e-05	0.000861565	0.00122565	0.000174514	0.000130355	0.000603726	0.000377695	3.99769e-05	0.000733583	0.41716	-1.26133	0.338306	0.528572	-0.919827	0.439756
P0A746	msrB	Peptide methionine sulfoxide reductase MsrB (EC 1.8.4.12)	Cytoplasmic	0.0296756	0.00411033	0.0266095	0.00319206	0.0128721	0.00397542	0.00815483	0.0184198	0.0168406	0.00115513	0.000165618	0.000575655	0.000128408	0.000508579	0.000153876	0.000320136	0.000267386	0.000670153	0.417032	-1.26177	0.33106	0.663188	-0.592511	0.549987
P52647	ydbK	Pyruvate-flavodoxin oxidoreductase (EC 1.2.7.-)	Cytoplasmic		0.00793928	0.0188014		0.00233437	0.00532702					0.000319899	0.000406739		9.22312e-05	0.000206192				0.410691	-1.28387	0.104198
P23522	garL	2-dehydro-3-deoxyglucarate aldolase (EC 4.1.2.20)	Cytoplasmic	0.00242402		0.00413054	0.000778486	0.00160036	0.000469061	0.00218496		0.000675236	9.43557e-05		8.93579e-05	3.13163e-05	6.32302e-05	1.81559e-05	8.57751e-05		2.68702e-05	0.408979	-1.2899	0.0515068	0.613157	-0.705671	0.439546
P0AAQ2	yajD	Uncharacterized protein YajD	Cytoplasmic	0.00359752		0.0035078		0.0012438	0.00100356	0.00451042	0.0151608		0.000140035		7.58859e-05		4.91427e-05	3.88446e-05	0.000177066	0.000220077		0.407498	-1.29513	0.289569	1.8393	0.879158	0.161429
P02925	rbsB	Ribose ABC transport system, periplasmic ribose-binding protein RbsB (TC 3.A.1.2.1)	Periplasmic	0.0146696	0.027415	0.045911	0.00120317	0.0129673	0.0133019	0.0151173	0.0109066		0.000571019	0.00110464	0.000993213	4.84001e-05	0.000512338	0.000514877	0.000593461	0.000158323		0.403023	-1.31107	0.0774455	0.422529	-1.24288	0.192968
P0AEE5	mglB	Galactose/methyl galactoside ABC transport system, D-galactose-binding periplasmic protein MglB (TC 3.A.1.2.3)	Periplasmic	0.0139337	0.0231693	0.0429053	0.00207905	0.0156659	0.00687591	0.0111967	0.00629136	0.00100764	0.000542375	0.000933565	0.000928189	8.36343e-05	0.000618962	0.000266145	0.000439552	9.13268e-05	4.00979e-05	0.402949	-1.31133	0.0809073	0.237498	-2.07401	0.0276116
P76085	paaK	Phenylacetate-coenzyme A ligase (EC 6.2.1.30) PaaF	Cytoplasmic	0.00560291	0.00527469	0.0104777	0.00175458	0.00296008	0.0019019	0.00209375		0.00132184	0.000218095	0.000212534	0.000226668	7.05817e-05	0.000116953	7.36165e-05	8.21947e-05		5.26012e-05	0.39731	-1.33166	0.00873679	0.307614	-1.70081	0.046529
P0AEM9	fliY	Cystine ABC transporter, periplasmic cystine-binding protein FliY	Periplasmic	0.00572563	0.0114149	0.0170056	0.00228263	0.00524385	0.00304051				0.000222872	0.000459941	0.00036789	9.18238e-05	0.000207185	0.000117689				0.396589	-1.33428	0.0728032	OFF	OFF
P00968	carB	Carbamoyl-phosphate synthase large chain (EC 6.3.5.5)	Inner Membrane	0.0316826	0.0352438	0.0973961	0.0164343	0.0144105	0.0163275	0.0177792	0.0238847	0.0132798	0.00123326	0.00142008	0.00210701	0.000661107	0.000569358	0.000631989	0.000697959	0.000346715	0.000528452	0.391243	-1.35386	0.0665634	0.330464	-1.59743	0.0433426
P43672	uup	ABC transporter ATP-binding protein uup	Inner Membrane	0.000678131	0.00145681	0.0504311	0.00481784	0.00256265	0.00394784	0.00247877		0.00274923	2.63965e-05	5.86994e-05	0.001091	0.000193808	0.000101251	0.000152809	9.73096e-05		0.000109402	0.38081	-1.39286	0.559601	0.263642	-1.92335	0.495797
P07017	tar	Methyl-accepting chemotaxis protein II (aspartate chemoreceptor protein)	Inner Membrane	0.015454	0.0796838	0.226654	0.0270747	0.0104918	0.0454327	0.0273483	0.0542394	0.0602447	0.000601554	0.00321072	0.00490331	0.00108914	0.000414532	0.00175856	0.00107362	0.000787352	0.00239737	0.374299	-1.41774	0.280823	0.488589	-1.03331	0.360803
P04995	sbcB	Exodeoxyribonuclease I (EC 3.1.11.1)	Cytoplasmic	0.00126248	0.00232272	0.00944711	0.00126091	0.00147189	0.000490217				4.91423e-05	9.35899e-05	0.000204374	5.07228e-05	5.81546e-05	1.89748e-05				0.368338	-1.4409	0.250589	OFF	OFF
P25526	gabD	Succinate-semialdehyde dehydrogenase [NADP(+)] GabD (SSDH) (EC 1.2.1.79)	Inner Membrane	0.00568016	0.00353677	0.0128901	0.00154296	0.00167774	0.00266812	0.00255618		0.00261735	0.000221102	0.000142508	0.000278857	6.20689e-05	6.62876e-05	0.000103275	0.000100348		0.000104154	0.360534	-1.47179	0.0620888	0.477463	-1.06654	0.105006
P0ACP1	cra	Fructose repressor FruR, LacI family	Cytoplasmic	0.0207559	0.0233245	0.0205951	0.00646202	0.00976885	0.00351149	0.00842009	0.0653515	0.00432711	0.00080793	0.000939818	0.000445543	0.000259949	0.000385968	0.000135919	0.000330549	0.000948658	0.000172192	0.356467	-1.48816	0.0670891	0.661745	-0.595653	0.434693
P0A7F3	pyrI	Aspartate carbamoyltransferase regulatory chain (PyrI)	Cytoplasmic	0.0700513	0.0658146	0.133072	0.0250195	0.023411	0.0252816	0.00917534	0.0354895	0.0196836	0.00272677	0.00265188	0.00287881	0.00100647	0.00092497	0.000978573	0.000360198	0.000515174	0.000783284	0.35241	-1.50467	0.000447038	0.200868	-2.31568	0.000492196
P0AG99	secG	Preprotein translocase subunit SecG (TC 3.A.5.1.1)	Inner Membrane	0.00137492	0.0067126	0.0304372	0.00218046	0.00119824	0.00530623				5.35193e-05	0.000270472	0.000658462	8.7714e-05	4.73424e-05	0.000205388				0.346524	-1.52897	0.350075	OFF	OFF
P0ABJ1	cyoA	Cytochrome O ubiquinol oxidase subunit II (EC 1.10.3.-)	Inner Membrane	0.00725072	0.0169066	0.072454	0.00521003		0.00956726	0.00621226		0.0173508	0.000282237	0.000681223	0.00156743	0.000209585		0.000370319	0.000243876		0.000690454	0.343696	-1.5408	0.280462	0.553756	-0.852678	0.457132
P0AE18	map	Methionine aminopeptidase (EC 3.4.11.18)	Inner Membrane	0.00839357		0.0358846	0.00140368	0.00677933	0.00594785	0.00174907	0.0167856	0.0170959	0.000326723		0.000776308	5.64661e-05	0.000267852	0.000230223	6.86636e-05	0.000243663	0.000680312	0.335162	-1.57707	0.33458	0.599946	-0.737095	0.517218
P0AFD6	nuoI	NADH-ubiquinone oxidoreductase chain I (EC 1.6.5.3)	Inner Membrane	0.00456273	0.00176551	0.0124789	0.00118051	0.00213012	0.00105089				0.000177606	7.11381e-05	0.000269962	4.74887e-05	8.41611e-05	4.06765e-05				0.332224	-1.58977	0.17674	OFF	OFF
P36929	rsmB	Ribosomal RNA small subunit methyltransferase B (EC 2.1.1.176) (16S rRNA m5C967 methyltransferase) (rRNA (cytosine-C(5)-)-methyltransferase RsmB)	Inner Membrane	0.00140518		0.0465686		0.00676833	0.00211249				5.4697e-05		0.00100744		0.000267417	8.1768e-05				0.328757	-1.60491	0.589541
P0AEQ3	glnH	Glutamine-binding periplasmic protein (GlnBP)	Periplasmic	0.00876686	0.00915517	0.0253076	0.00243685	0.0044846		0.002536		0.00632632	0.000341253	0.000368891	0.000547491	9.80277e-05	0.000177187		9.95561e-05		0.000251749	0.328252	-1.60712	0.0348661	0.419006	-1.25496	0.116046
P76372	wzzB	regulator of length of O-antigen component of lipopolysaccharide chains	Inner Membrane		0.00295471	0.009105	0.000501275		0.00212659	0.000601293		0.00272962		0.000119055	0.000196973	2.01649e-05		8.23137e-05	2.36051e-05		0.000108622	0.324271	-1.62473	0.171665	0.418404	-1.25703	0.252929
P05704	trg	Methyl-accepting chemotaxis protein III (ribose and galactose chemoreceptor protein)	Inner Membrane	0.00276263	0.0195991	0.0887316	0.00605845	0.0018434	0.0152631	0.00969301	0.00491413	0.0135113	0.000107536	0.00078971	0.00191957	0.000243715	7.28328e-05	0.000590786	0.00038052	7.13346e-05	0.000537667	0.322113	-1.63436	0.351905	0.351291	-1.50926	0.368686
P00550	mtlA	PTS system, mannitol-specific IIA component	Inner Membrane	0.00247831	0.012529	0.0252206	0.00269476	0.00118633	0.00534139	0.00491283		0.00420268	9.6469e-05	0.000504832	0.000545608	0.000108403	4.6872e-05	0.000206749	0.000192864		0.000167241	0.315652	-1.6636	0.202707	0.470967	-1.0863	0.293453
P33136	mdoG	Glucans biosynthesis protein G precursor	Periplasmic	0.0281556	0.0247374	0.00564133	0.00724029	0.00458142	0.00582217	0.00197067		0.00390676	0.00109597	0.000996748	0.000122042	0.000291257	0.000181012	0.000225358	7.73628e-05		0.000155465	0.314991	-1.66662	0.242957	0.157688	-2.66485	0.180436
P0ADW3	yhcB	Inner membrane protein YhcB	Inner Membrane	0.00461545	0.0126811	0.0253346	0.00346576	0.000535517	0.00591114	0.00206846		0.000971091	0.000179658	0.000510964	0.000548075	0.000139418	2.11583e-05	0.000228802	8.12018e-05		3.86434e-05	0.314345	-1.66958	0.121073	0.145127	-2.78462	0.090346
P09551	argT	Lysine-arginine-ornithine-binding periplasmic protein precursor (TC 3.A.1.3.1)	Periplasmic	0.00389431	0.0157144	0.00311036		0.0035112	0.00101207				0.000151588	0.000633184	6.72878e-05		0.000138728	3.91742e-05				0.313186	-1.67491	0.385679	OFF	OFF
P0A908	mipA	MltA-interacting protein MipA	Outer Membrane		0.00642411	0.00259043		0.000754333	0.00176641					0.000258848	5.604e-05		2.98037e-05	6.83722e-05				0.311781	-1.6814	0.475085
P23843	oppA	Oligopeptide ABC transporter, periplasmic oligopeptide-binding protein OppA (TC 3.A.1.5.1)	Periplasmic	0.07354	0.182749	0.235201	0.013618	0.0545058	0.0535099	0.0342037	0.047592	0.076525	0.00286257	0.00736355	0.0050882	0.000547814	0.00215353	0.0020712	0.00134274	0.000690856	0.00304522	0.311639	-1.68205	0.0988505	0.331638	-1.59232	0.101845
P0A786	pyrB	Aspartate carbamoyltransferase (EC 2.1.3.2)	Cytoplasmic	0.0342457	0.0531404	0.0857432	0.019699	0.00883735	0.0119745	0.0177875	0.0274729	0.0122439	0.00133303	0.0021412	0.00185492	0.000792437	0.000349164	0.000463494	0.000698288	0.000398803	0.000487231	0.301192	-1.73125	0.0176466	0.297294	-1.75004	0.0230273
P33232	lldD	L-lactate dehydrogenase (EC 1.1.2.3)	Inner Membrane	0.00459259	0.00384407	0.0686145	0.00498153	0.00506801	0.00348233	0.00236261		0.00401268	0.000178768	0.00015489	0.00148437	0.000200393	0.000200237	0.00013479	9.27494e-05		0.00015968	0.294506	-1.76363	0.433081	0.208272	-2.26346	0.388711
P09151	leuA	2-isopropylmalate synthase (EC 2.3.3.13)	Cytoplasmic		0.0291219	0.00374536	0.0112666	0.00170541	0.000641325	0.000661052		0.0060264		0.00117341	8.1025e-05	0.000453223	6.7381e-05	2.48237e-05	2.5951e-05		0.000239813	0.289866	-1.78654	0.561478	0.211859	-2.23882	0.528986
P08957	hsdM	Type I restriction-modification system, DNA-methyltransferase subunit M (EC 2.1.1.72)	Cytoplasmic	0.0193591	0.0126611	0.0580097	0.00311293	0.00504718	0.00977184	0.0138941	0.00449277	0.0197795	0.000753559	0.000510155	0.00125495	0.000125224	0.000199414	0.000378238	0.000545442	6.52181e-05	0.000787102	0.279067	-1.84132	0.0975323	0.554961	-0.84954	0.287964
P08192	folC	Folylpolyglutamate synthase (EC 6.3.2.17)	Cytoplasmic	0.000609098		0.0775728	0.00300706	0.00884369		0.00726327		0.00288315	2.37094e-05		0.00167817	0.000120966	0.000349415		0.000285136		0.000114731	0.276389	-1.85523	0.591812	0.234957	-2.08953	0.574953
P09323	nagE	PTS system, N-acetylglucosamine-specific IIC component	Inner Membrane		0.0025584	0.0188328		0.00180427	0.00179094					0.000103086	0.000407419		7.12869e-05	6.93219e-05				0.275431	-1.86024	0.438282
Q46845	yghU	Uncharacterized GST-like protein yghU associated with glutathionylspermidine synthetase/amidase	Inner Membrane	0.0017807		0.0119991		0.00139571	0.00087369				6.93142e-05		0.000259582		5.51444e-05	3.38179e-05				0.270488	-1.88637	0.424893
P0ABA0	atpF	ATP synthase F0 sector subunit b	Inner Membrane	0.00330594	0.00962541	0.0320762	0.00148004	0.000995363	0.00588628	0.000752392		0.00986423	0.000128685	0.000387839	0.00069392	5.95377e-05	3.93268e-05	0.00022784	2.95368e-05		0.000392535	0.269905	-1.88948	0.205756	0.523038	-0.935012	0.499293
P25665	metE	5-methyltetrahydropteroyltriglutamate--homocysteine methyltransferase (EC 2.1.1.14)	Cytoplasmic	0.013362	0.0070438	0.0951124	0.00444673	0.00896925	0.00209174	0.00738059		0.00905197	0.000520121	0.000283817	0.00205761	0.00017888	0.000354376	8.09649e-05	0.000289741		0.000360212	0.214646	-2.21997	0.309516	0.3407	-1.55343	0.375433
P0A9W9	yrdA	Protein YrdA	Cytoplasmic	0.00313908	0.0135967	0.00263424	0.0002631	0.00263533	0.000958402				0.00012219	0.000547856	5.69876e-05	1.05838e-05	0.000104122	3.70968e-05				0.208798	-2.25982	0.338425	OFF	OFF
P0ADZ7	yajC	UPF0092 membrane protein YajC	Inner Membrane		0.015355	0.0197959	0.0032243	0.000259378	0.00462717	0.00578597		0.00995593		0.000618704	0.000428254	0.000129705	1.0248e-05	0.000179103	0.000227141		0.000396184	0.203164	-2.29928	0.0878032	0.595368	-0.748147	0.239835
P02931	ompF	Outer membrane protein F (Outer membrane protein 1A) (Outer membrane protein B) (Outer membrane protein IA) (Porin OmpF)	Outer Membrane	0.00250846	0.00977934	0.0179998	0.000640327		0.00227397	0.00411119		0.00393587	9.76426e-05	0.000394041	0.000389397	2.57586e-05		8.80183e-05	0.000161394		0.000156623	0.1937	-2.3681	0.127709	0.541409	-0.885209	0.303174
P23883	puuC	Gamma-glutamyl-aminobutyraldehyde dehydrogenase (EC 1.2.1.-)	Cytoplasmic	0.0113604	0.00977112	0.0151547	0.00175225	0.00107961	0.00245649	0.00176435		0.00332963	0.000442206	0.00039371	0.000327848	7.04883e-05	4.26554e-05	9.50832e-05	6.92635e-05		0.000132499	0.178925	-2.48257	0.00409498	0.260056	-1.94311	0.0105999
P08331	cpdB	2',3'-cyclic-nucleotide 2'-phosphodiesterase (EC 3.1.4.16)	Periplasmic	0.0185391		0.00364171		0.00162792	0.00190937				0.000721642		7.87828e-05		6.43191e-05	7.39058e-05				0.17269	-2.53375	0.490541
P69831	gatC	PTS system, galactitol-specific IIC component (EC 2.7.1.69)	Inner Membrane		0.010739	0.0634407		0.00213719	0.00513274					0.000432707	0.00137244		8.44403e-05	0.000198673				0.156836	-2.67267	0.349021
P25714	yidC	Membrane protein insertase YidC (Foldase YidC) (Inner membrane protein YidC) (Membrane integrase YidC) (Oxa1Ec)	Inner Membrane	0.067514	0.075732	0.07878	0.085563	0.090421	0.083668	0.086741	0.010034	0.089102	0.00154774	0.00179699	0.00162769	0.00196228	0.00216875	0.00225593	0.00178789	0.00216568	0.00206818	1.28448	0.361183	0.0152413	1.21103	0.276238	0.0706818
P50457	puuE	Gamma-aminobutyrate:alpha-ketoglutarate aminotransferase (EC 2.6.1.19)	Cytoplasmic	0.0128562	0.00914344	0.0199999	0.00210597	0.00165414	0.00120571	0.00282704		0.0027428	0.000500432	0.000368418	0.000432667	8.47174e-05	6.53553e-05	4.66693e-05	0.000110982		0.000109146	0.151164	-2.72582	0.0068492	0.253698	-1.97882	0.0135359
P0ADP0	yigB	5-amino-6-(5-phospho-D-ribitylamino)uracil phosphatase YigB (EC 3.1.3.-)	Cytoplasmic		0.00642276	0.0073941	0.000448438	0.00063258						0.000258794	0.00015996	1.80394e-05	2.49933e-05					0.102764	-3.2826	0.162227
m_scFv	m_scFv	misfolded scFv construct								0.0130812	0.04199	0.0274727							0.00051353	0.000609536	0.00109324				ON	ON
P39180	flu	Antigen 43 (AG43) (Fluffing protein) [Cleaved into: Antigen 43 alpha chain; Antigen 43 beta chain]	Outer Membrane							0.038257	0.0236756	0.0375099							0.00150186	0.00034368	0.00149266				ON	ON
P0AC13	folP	Dihydropteroate synthase (EC 2.5.1.15)	Cytoplasmic					0.000688581	0.00111895	0.00116024		0.00310109					2.72059e-05	4.33113e-05	4.55476e-05		0.000123404
P18775	dmsA	Anaerobic dimethyl sulfoxide reductase chain A (EC 1.8.5.3)	Inner Membrane					0.000924197	0.00295741	0.00393231		0.00209671					3.65151e-05	0.000114472	0.000154371		8.34362e-05
P0AED0	uspA	Universal stress protein A	Inner Membrane					0.00614083	0.00670574	0.00825301		0.00905908					0.000242625	0.000259558	0.00032399		0.000360495
P76102	insQ	Putative transposase InsQ for insertion sequence element IS609	Cytoplasmic					0.00915128	0.0249503	0.0189511		0.0193998					0.000361568	0.000965749	0.000743968		0.000771991
P08142	ilvB	Acetolactate synthase large subunit (EC 2.2.1.6)	Cytoplasmic				0.00143464	0.00124692		0.00115628		0.00191527				5.77117e-05	4.92658e-05		4.53921e-05		7.62158e-05
P0ADI7	yecD	Nicotinamidase/isochorismatase family protein	Cytoplasmic					0.00241809	0.00163156	0.0016208		0.00213586					9.55387e-05	6.31527e-05	6.3628e-05		8.49941e-05
P24178	yffB	Protein YffB	Cytoplasmic					0.00213269	0.0025732	0.00230195		0.00126979					8.42625e-05	9.96005e-05	9.03681e-05		5.05299e-05
P02930	tolC	Type I secretion outer membrane protein, TolC precursor	Outer Membrane				0.000577371		0.0024783							2.3226e-05		9.59273e-05
P03817	mioC	Flavoprotein MioC	Cytoplasmic				0.00219664	0.00190525								8.83645e-05	7.52765e-05
P04335	frsA	Esterase FrsA (EC 3.1.-.-)	Cytoplasmic				0.000707242	0.00271887								2.84504e-05	0.000107423
P05523	mutM	Formamidopyrimidine-DNA glycosylase (EC 3.2.2.23)	Cytoplasmic				0.0018772		0.000216743							7.55146e-05		8.38946e-06
P05719	hsdS	Type I restriction-modification system, specificity subunit S (EC 3.1.21.3)	Cytoplasmic					0.00276953	0.0033048								0.000109424	0.000127918
P05852	tsaD	TsaD/Kae1/Qri7 protein, required for threonylcarbamoyladenosine t(6)A37 formation in tRNA	Cytoplasmic	0.000339443	0.000392934								1.32129e-05	1.58326e-05
P06721	metC	Cystathionine beta-lyase (EC 4.4.1.8)	Cytoplasmic					0.00139467	0.000919915								5.51036e-05	3.56071e-05
P06846	ebgR	Evolved beta-D-galactosidase transcriptional repressor	Cytoplasmic				0.00578671	0.00533305								0.000232783	0.000210709
P06864	ebgA	Evolved beta-D-galactosidase, alpha subunit	Cytoplasmic					0.00511777	0.00915467								0.000202203	0.000354349
P07000	pldB	Lysophospholipase L2 (EC 3.1.1.5)	Inner Membrane					0.000537408	0.00125506								2.1233e-05	4.85797e-05
P07001	pntA	NAD(P) transhydrogenase alpha subunit (EC 1.6.1.2)	Inner Membrane		0.000755581	0.00671646								3.04448e-05	0.0001453
P07649	truA	tRNA pseudouridine synthase A (EC 4.2.1.70)	Cytoplasmic					0.000586465	0.000864472								2.31713e-05	3.3461e-05
P08194	glpT	Glycerol-3-phosphate transporter	Inner Membrane		0.00100041	0.00464373								4.03096e-05	0.00010046
P08373	murB	UDP-N-acetylenolpyruvoylglucosamine reductase (EC 1.1.1.158)	Cytoplasmic	0.00108711		0.00344673							4.23163e-05		7.45647e-05
P09127	hemX	Putative uroporphyrinogen-III C-methyltransferase (Urogen-III methylase) (EC 2.1.1.107) (ORF X)	Inner Membrane		0.00257707	0.0040648								0.000103838	8.79356e-05
P09158	speE	Spermidine synthase (EC 2.5.1.16)	Cytoplasmic	0.00375381		0.00340697							0.000146118		7.37044e-05
P09424	mtlD	Mannitol-1-phosphate 5-dehydrogenase (EC 1.1.1.17)	Cytoplasmic	0.00238332		0.000470179							9.27716e-05		1.01716e-05
P0A6C1	nfo	Endonuclease IV (EC 3.1.21.2)	Cytoplasmic				0.00437517	0.00631623								0.000176001	0.000249555
P0A6E6	atpC	ATP synthase epsilon chain (EC 3.6.3.14)	Inner Membrane	0.0105025		0.00430258							0.000408813		9.30795e-05
P0A6L9	hscB	Chaperone protein HscB	Cytoplasmic					0.00601801	0.00679511								0.000237772	0.000263018
P0A731	mgsA	Methylglyoxal synthase (EC 4.2.3.3)	Cytoplasmic	0.0082883		0.00845914							0.000322625		0.000183
P0A7Q6	rpmJ	LSU ribosomal protein L36p	Cytoplasmic				0.122046	0.0491445								0.00490956	0.0019417
P0A812	ruvB	Holliday junction DNA helicase RuvB	Cytoplasmic				0.00104359	0.000641203								4.19806e-05	2.5334e-05
P0A840	surE	Exopolyphosphatase (EC 3.6.1.11)	Cytoplasmic					0.00197122	0.00107158								7.78829e-05	4.14777e-05
P0A884	thyA	Thymidylate synthase (EC 2.1.1.45)	Cytoplasmic	0.00386618		0.00739776					0.00563979	0.00344495	0.000150492		0.000160039					8.18684e-05	0.000137088				0.705101	-0.504099	0.339225
P0A8C1	ybjQ	UPF0145 protein YbjQ	Cytoplasmic				0.0142351		0.00155735							0.000572639		6.02801e-05
P0A8F8	uvrB	Excinuclease ABC subunit B	Cytoplasmic					0.0491831	0.0406194								0.00194323	0.00157225
P0A8G0	uvrC	Excinuclease ABC subunit C	Cytoplasmic				0.00975923	0.00829302								0.000392587	0.000327658
P0A8J4	ybeD	Proposed lipoate regulatory protein YbeD	Cytoplasmic	0.00873829		0.00594653					0.0444996	0.00904208	0.000340141		0.000128644					0.000645967	0.000359819				2.14552	1.10132	0.280436
P0A8K1	psd	Phosphatidylserine decarboxylase (EC 4.1.1.65)	Inner Membrane					0.00273167	0.00328071								0.000107929	0.000126986
P0A8M6	yeeX	UPF0265 protein YeeX	Cytoplasmic							0.00914078		0.00704602							0.000358841		0.000280388
P0A8N0	matP	Macrodomain Ter protein	Cytoplasmic					0.00305741	0.00145407								0.000120799	5.62824e-05
P0A8N7	epmA	Elongation factor P--(R)-beta-lysine ligase (EF-P--(R)-beta-lysine ligase) (EC 6.3.1.-) (EF-P post-translational modification enzyme A) (EF-P-lysine lysyltransferase) (GX)	Cytoplasmic					0.000555494	0.000633269								2.19476e-05	2.45119e-05
P0A8R4	slyX	Protein SlyX	Cytoplasmic	0.00189866	0.00181542								7.39061e-05	7.31492e-05
P0A8W0	nanR	Transcriptional regulator NanR	Cytoplasmic				0.000445592	0.000845272								1.79249e-05	3.33968e-05
P0A948	rimJ	Ribosomal-protein-S5p-alanine acetyltransferase	Inner Membrane				0.000458559	0.000768016								1.84466e-05	3.03444e-05
P0A962	ansA	L-asparaginase I, cytoplasmic (EC 3.5.1.1)	Cytoplasmic					0.00345287	0.00132174								0.000136423	5.11604e-05
P0A9F6	gcvA	Glycine cleavage system transcriptional activator GcvA	Cytoplasmic					0.010769	0.00106338								0.000425484	4.11602e-05
P0A9M2	hpt	Hypoxanthine-guanine phosphoribosyltransferase (EC 2.4.2.8)	Cytoplasmic					0.00572587	0.00186895								0.000226229	7.23415e-05
P0A9Z1	glnB	Nitrogen regulatory protein P-II	Cytoplasmic	0.00394968		0.000996455							0.000153743		2.15568e-05
P0AA31	yedF	Putative sulfur carrier protein YedF	Cytoplasmic	0.00504145		0.0015728							0.00019624		3.40251e-05
P0AAE0	cycA	D-serine/D-alanine/glycine transporter	Inner Membrane		0.00180096	0.0105153								7.25663e-05	0.000227482
P0AAP3	frmR	Uncharacterized protein YaiN in in formaldehyde detoxification operon	Cytoplasmic					0.000508972	0.00075512								2.01095e-05	2.92284e-05
P0AB06	ycbK	Uncharacterized protein YcbK	Periplasmic					0.00196928	0.000402833								7.78062e-05	1.55924e-05
P0AB33	bssS	Biofilm regulator BssS	Cytoplasmic				0.00917758		0.00397011							0.000369189		0.000153671
P0ABC3	hflC	HflC protein	Inner Membrane		0.00212759	0.00661936								8.57276e-05	0.0001432
P0ABD3	bfr	Bacterioferritin (BFR) (EC 1.16.3.1) (Cytochrome b-1) (Cytochrome b-557)	Cytoplasmic				0.00220781	0.000270098								8.88141e-05	1.06716e-05
P0ABI8	cyoB	Cytochrome O ubiquinol oxidase subunit I (EC 1.10.3.-)	Inner Membrane		0.0031728	0.012518				0.00109992		0.00440663		0.000127842	0.000270807				4.31796e-05		0.000175357				0.548191	-0.867249	0.453106
P0ABJ9	cydA	Cytochrome d ubiquinol oxidase subunit I (EC 1.10.3.-)	Inner Membrane		0.00728915	0.012634				0.00800369		0.00468676		0.000293703	0.000273317				0.000314202		0.000186504				0.883049	-0.179435	0.69499
P0ABS5	dnaG	DNA primase (EC 2.7.7.-)	Cytoplasmic				0.00193452	0.00113013								7.78205e-05	4.46517e-05
P0ABX8	fliL	Flagellar biosynthesis protein FliL	Inner Membrane		0.00177673	0.00142398								7.15902e-05	3.08055e-05
P0AC44	sdhD	Succinate dehydrogenase hydrophobic membrane anchor protein	Inner Membrane		0.00487053	0.00467994								0.000196249	0.000101243
P0ACB7	hemY	Protein HemY	Inner Membrane		0.000968776	0.00388689								3.90351e-05	8.40869e-05
P0ACE3	hha	Hemolysin expression-modulating protein Hha	Cytoplasmic					0.0013331	0.000401029								5.26707e-05	1.55226e-05
P0ACK2	agaR	Transcriptional repressor of aga operon	Cytoplasmic					0.000477104	0.00132143								1.88504e-05	5.11484e-05
P0ACM5	yegW	Uncharacterized HTH-type transcriptional regulator YegW	Cytoplasmic		0.000873584	0.000611319								3.51995e-05	1.32249e-05
P0ACN4	allR	Negative regulator of allantoin and glyoxylate utilization operons	Cytoplasmic					0.000245781	0.000531909								9.71084e-06	2.05886e-05
P0ACP5	gntR	Gluconate utilization system Gnt-I transcriptional repressor	Cytoplasmic	0.00152644	0.00511605								5.94174e-05	0.000206142
P0ACT6	uidR	Transcriptional repressor UidR	Cytoplasmic				0.00167413		0.000630336							6.73457e-05		2.43984e-05
P0ADE4	tamA	Translocation and assembly module TamA (Autotransporter assembly factor TamA)	Outer Membrane					0.0022821	0.00269929								9.01659e-05	0.000104481
P0ADK0	yiaF	Uncharacterized protein YiaF	Inner Membrane		0.00123991	0.00648								4.996e-05	0.000140185
P0ADT2	ygiB	UPF0441 protein YgiB	Inner Membrane		0.0031792	0.00612587								0.0001281	0.000132524
P0ADT8	ygiM	Uncharacterized protein YgiM	Inner Membrane		0.00092539	0.00185608								3.72869e-05	4.01535e-05
P0ADV1	lptA	LptA, protein essential for LPS transport across the periplasm	Periplasmic					0.00119884	0.000675286								4.73662e-05	2.61383e-05
P0AE37	astA	Arginine N-succinyltransferase (EC 2.3.1.109)	Cytoplasmic	0.00116097	0.000661166								4.51911e-05	2.66405e-05
P0AE48	ytfP	Gamma-glutamylcyclotransferase family protein YtfP	Cytoplasmic					0.00109621	0.0012705								4.33113e-05	4.91773e-05
P0AED9	dcm	DNA-cytosine methyltransferase (EC 2.1.1.37) (M.EcoDcm)	Cytoplasmic				0.00240405	0.000614282								9.67083e-05	2.42703e-05
P0AEG6	dsbC	Thiol:disulfide interchange protein DsbC	Periplasmic					0.00194126	0.00285123								7.66992e-05	0.000110362
P0AES0	gss	Glutathionylspermidine amidohydrolase (EC 3.5.1.78)	Cytoplasmic					0.00280185	0.00283742								0.000110701	0.000109828
P0AEW9	fruK	1-phosphofructokinase (EC 2.7.1.56)	Cytoplasmic							0.0734891		0.0703508							0.00288498		0.00279953
P0AEX3	kgtP	Alpha-ketoglutarate permease	Inner Membrane		0.000551765	0.00731606								2.22324e-05	0.000158272
P0AF50	yjbR	Uncharacterized protein YjbR	Cytoplasmic					0.00101931	0.00117165								4.0273e-05	4.53511e-05
P0AF67	tsaE	TsaE protein, required for threonylcarbamoyladenosine t(6)A37 formation in tRNA	Cytoplasmic					0.00303142	0.00378969								0.000119772	0.000146687
P0AFC3	nuoA	NADH ubiquinone oxidoreductase chain A (EC 1.6.5.3)	Inner Membrane		0.00629005	0.0097487								0.000253446	0.000210898
P0AFH6	oppC	Oligopeptide transport system permease protein OppC (TC 3.A.1.5.1)	Inner Membrane		0.000856224	0.00808636								3.45e-05	0.000174936
P0AFQ7	ycfH	Putative deoxyribonuclease YcfH	Cytoplasmic					0.000870215	0.00125941								3.43823e-05	4.87478e-05
P0AFW4	rnk	Regulator of nucleoside diphosphate kinase	Cytoplasmic	0.00215455		0.00300496							8.38665e-05		6.50077e-05
P0AG27	yibN	Uncharacterized protein YibN	Inner Membrane		0.00113462	0.00836747								4.57173e-05	0.000181017
P0AG63	rpsQ	SSU ribosomal protein S17p (S11e)	Cytoplasmic							0.0137788	0.0439341								0.000540918	0.000637757
P0AG93	secF	Protein translocase subunit SecF	Inner Membrane		0.000832913	0.00115429								3.35607e-05	2.49712e-05
P0AGA2	secY	Protein translocase subunit SecY	Inner Membrane		0.0088895	0.0677333								0.000358187	0.00146531
P0AGB0	serB	Phosphoserine phosphatase (EC 3.1.3.3)	Cytoplasmic					0.0020008	0.00240012								7.90517e-05	9.29012e-05
P0AGE6	chrR	Chromate reductase (CHRR) (EC 1.6.5.2) (NAD(P)H dehydrogenase (quinone))	Cytoplasmic	0.0158825		0.00481551							0.000618233		0.000104176
P0AGJ2	trmH	tRNA (guanosine(18)-2'-O)-methyltransferase (EC 2.1.1.34) (tRNA [Gm18] methyltransferase)	Cytoplasmic	0.00202358		0.000227411		0.00109329	0.000778405				7.87686e-05				4.31959e-05	3.01297e-05
P0C0L9	iscX	Protein IscX	Cytoplasmic				0.00675482	0.00516518								0.000271728	0.000204077
P0C7L2	paaJ	Phenylacetic acid degradation protein PaaE, ketothiolase	Cytoplasmic				0.000649175	0.000888323								2.61145e-05	3.50977e-05
P10100	rlpA	Rare lipoprotein A precursor	Outer Membrane					0.000741581	0.00149613								2.92999e-05	5.79106e-05
P10346	glnQ	Glutamine transport ATP-binding protein GlnQ	Inner Membrane					0.00679575	0.00283014								0.0002685	0.000109546
P14081	selB	Selenocysteine-specific translation elongation factor	Cytoplasmic		0.00154767	0.000197834	0.00526563	0.00120256						6.23608e-05		0.000211822	4.75131e-05
P15038	helD	DNA helicase IV	Cytoplasmic				0.00213697		0.00570801							8.59642e-05		0.00022094
P15078	cstA	Carbon starvation protein A	Inner Membrane		0.00544635	0.00682308								0.000219451	0.000147607
P15373	prlF	Antitoxin PrlF (HtrA suppressor protein SohA)	Cytoplasmic					0.00100564	0.00175222								3.97328e-05	6.78229e-05
P15723	dgt	Deoxyguanosinetriphosphate triphosphohydrolase (dGTP triphosphohydrolase) (dGTPase) (EC 3.1.5.1)	Cytoplasmic					0.000211185	0.0126165								8.34392e-06	0.000488346
P15770	aroE	Shikimate 5-dehydrogenase I alpha (EC 1.1.1.25)	Cytoplasmic					0.0011514	0.00114345								4.54918e-05	4.42594e-05
P15877	gcd	Glucose dehydrogenase, PQQ-dependent (EC 1.1.5.2)	Inner Membrane		0.00121553	0.00233632								4.89776e-05	5.05427e-05
P16384	miaA	tRNA dimethylallyltransferase (EC 2.5.1.75)	Cytoplasmic					0.000303426	0.000361782								1.19884e-05	1.40035e-05
P17444	betA	Choline dehydrogenase (EC 1.1.99.1)	Inner Membrane					0.00320605	0.00343303								0.000126671	0.000132882
P18133	pncB	Nicotinate phosphoribosyltransferase (EC 2.4.2.11)	Periplasmic	0.00405559	0.00116299								0.000157865	4.68607e-05
P23256	malY	Maltose regulon modulator	Cytoplasmic	0.000300516		0.000189574	0.00184962		0.000903822				1.16977e-05			7.44053e-05		3.49842e-05
P23894	htpX	Protease HtpX (EC 3.4.24.-) (Heat shock protein HtpX)	Inner Membrane		0.000664873	0.00504205								2.67898e-05	0.000109077
P24183	fdnG	Formate dehydrogenase N alpha subunit (EC 1.2.1.2)	Inner Membrane					0.00220026	0.00869604								8.69322e-05	0.000336597
P24216	fliD	Flagellar hook-associated protein FliD	Outer Membrane		0.00206769	0.00792516								8.33139e-05	0.000171449
P25437	frmA	S-(hydroxymethyl)glutathione dehydrogenase (EC 1.1.1.284)	Inner Membrane				0.0026518	0.000551518								0.000106675	2.17905e-05
P25519	hflX	GTP-binding protein HflX	Inner Membrane					0.00103017	0.00282772								4.07021e-05	0.000109452
P25746	hflD	High frequency lysogenization protein HflD	Inner Membrane				0.0019337		0.000809672							7.77873e-05		3.13399e-05
P25798	fliF	Flagellar M-ring protein FliF	Inner Membrane		0.0386556	0.0380885								0.00155756	0.000823985
P27249	glnD	[Protein-PII] uridylyltransferase (EC 2.7.7.59)	Cytoplasmic		0.00261579	0.0010987								0.000105399	2.37686e-05
P27254	argK	GTPase ArgK (EC 3.6.5.-) (G-protein chaperone)	Inner Membrane	0.000234689	0.00145717								9.13537e-06	5.87139e-05
P27278	nadR	NadR transcriptional regulator	Cytoplasmic					0.00140938	0.00170049								5.56845e-05	6.58206e-05
P27830	rffG	dTDP-glucose 4,6-dehydratase (EC 4.2.1.46)	Cytoplasmic				0.00157077	0.00125312								6.31877e-05	4.95108e-05
P27833	wecE	dTDP-4-amino-4,6-dideoxygalactose transaminase (EC 2.6.1.59)	Cytoplasmic					0.00457788	0.000641447								0.000180872	2.48285e-05
P28861	fpr	Ferredoxin--NADP(+) reductase (EC 1.18.1.2)	Cytoplasmic				0.0015609	0.000723384								6.27907e-05	2.8581e-05
P29744	flgL	Flagellar hook-associated protein FlgL	Outer Membrane	0.000793369		0.000922982							3.08822e-05		1.99673e-05
P30863	dkgB	2,5-diketo-D-gluconic acid reductase B (EC 1.1.1.274)	Cytoplasmic	0.00247312		0.000412464							9.6267e-05		8.92303e-06
P30870	glnE	Glutamate-ammonia-ligase adenylyltransferase (EC 2.7.7.42)	Cytoplasmic				0.0172846	0.000787702								0.00069531	3.11222e-05
P32141	yihT	Aldolase YihT	Cytoplasmic					0.00227039	0.00212342								8.97032e-05	8.2191e-05
P32684	rluF	23S rRNA pseudouridine(2604) synthase (EC 5.4.99.21) (Ribosomal large subunit pseudouridine synthase F) (rRNA pseudouridylate synthase F) (rRNA-uridine isomerase F)	Inner Membrane					0.00143217	0.00141121								5.6585e-05	5.46235e-05
P33018	yeiG	S-formylglutathione hydrolase (EC 3.1.2.12)	Cytoplasmic	0.000892455	0.00112437					0.000636142		0.00484576	3.47391e-05	4.53044e-05					2.49731e-05		0.000192831				2.72107	1.44418	0.562238
P33355	yehS	Uncharacterized protein YehS	Cytoplasmic					0.000264344	0.00037871								1.04443e-05	1.46587e-05
P33643	rluD	Ribosomal large subunit pseudouridine synthase D (EC 4.2.1.70)	Cytoplasmic					0.000726566	0.000391908								2.87067e-05	1.51696e-05
P33937	napA	Periplasmic nitrate reductase precursor (EC 1.7.99.4)	Periplasmic				0.00206818	0.00436128								8.31973e-05	0.000172314
P36673	treR	Trehalose operon transcriptional repressor	Cytoplasmic					0.000355787	0.000419197								1.40572e-05	1.62258e-05
P37344	pspF	Psp operon transcriptional activator	Cytoplasmic					0.000545958	0.000944671								2.15708e-05	3.65653e-05
P37351	rpiB	Ribose 5-phosphate isomerase B (EC 5.3.1.6)	Cytoplasmic					0.00171518	0.00217095								6.77669e-05	8.40309e-05
P37613	panM	PanD maturation factor	Cytoplasmic					0.00113144	0.000879175								4.47033e-05	3.40301e-05
P37626	yhiI	Uncharacterized protein YhiI	Inner Membrane		0.00103161	0.00202815								4.15667e-05	4.38759e-05
P37745	rfbC	dTDP-4-dehydrorhamnose 3,5-epimerase (EC 5.1.3.13) (Thymidine diphospho-4-keto-rhamnose 3,5-epimerase) (dTDP-4-keto-6-deoxyglucose 3,5-epimerase) (dTDP-6-deoxy-D-xylo-4-hexulose 3,5-epimerase) (dTDP-L-rhamnose synthase)	Cytoplasmic	0.0073398		0.012395					0.00423389	0.00533353	0.000285704		0.000268147					6.146e-05	0.000212241				0.494179	-1.0169	0.311088
P39321	tamB	Translocation and assembly module TamB (Autotransporter assembly factor TamB)	Inner Membrane		0.0146551	0.0121936								0.000590499	0.000263789
P39342	yjgR	Uncharacterized protein YjgR	Inner Membrane	0.000933807		0.000878167							3.63488e-05		1.89978e-05
P39353	yjhC	Uncharacterized oxidoreductase YjhC (EC 1.-.-.-)	Cytoplasmic					0.000513429	0.000604314								2.02856e-05	2.33911e-05
P39356	yjhU	Uncharacterized transcriptional regulator YjhU	Cytoplasmic					0.000809334	0.000741818								3.19768e-05	2.87135e-05
P39360	yjhI	Uncharacterized HTH-type transcriptional regulator YjhI	Cytoplasmic					0.00569136	0.00636153								0.000224866	0.000246235
P39396	yjiY	Carbon starvation protein A paralog	Inner Membrane		0.00243554	0.00424708								9.81357e-05	9.18791e-05
P45425	nanK	N-acetylmannosamine kinase (EC 2.7.1.60)	Cytoplasmic					0.00175369	0.000823333								6.92884e-05	3.18687e-05
P46852	yhhW	Quercetin 2,3-dioxygenase (Quercetinase) (EC 1.13.11.24) (Pirin-like protein YhhW)	Cytoplasmic					0.000268109	0.00119611								1.0593e-05	4.62979e-05
P52037	ygfF	Uncharacterized oxidoreductase YgfF (EC 1.-.-.-)	Cytoplasmic		0.000492347	0.00172547								1.98382e-05	3.7328e-05
P52108	rstA	Transcriptional regulatory protein RstA	Cytoplasmic					0.00107882	0.00100503								4.26242e-05	3.89017e-05
P52126	yfjK	Uncharacterized protein YfjK	Cytoplasmic		0.00120711	0.000668681								4.86382e-05	1.44659e-05
P52645	ydbH	Uncharacterized protein YdbH	Inner Membrane					0.000776431	0.000671293								3.06768e-05	2.59837e-05
P55135	rlmD	23S rRNA (uracil(1939)-C(5))-methyltransferase RlmD (EC 2.1.1.190) (23S rRNA(m5U1939)-methyltransferase)	Cytoplasmic					0.00264241	0.00413765								0.000104402	0.000160156
P60664	hisF	Imidazole glycerol phosphate synthase cyclase subunit (EC 4.1.3.-)	Cytoplasmic				0.00184121	0.000914716								7.40669e-05	3.61405e-05
P60757	hisG	ATP phosphoribosyltransferase (EC 2.4.2.17)	Inner Membrane	0.00110408	0.000457859								4.29768e-05	1.84486e-05
P61316	lolA	Outer membrane lipoprotein carrier protein LolA	Periplasmic		0.000648136	0.00107728								2.61155e-05	2.33054e-05
P63177	rlmB	23S rRNA (guanosine-2'-O-)-methyltransferase RlmB (EC 2.1.1.185) (23S rRNA (guanosine2251 2'-O)-methyltransferase) (23S rRNA Gm2251 2'-O-methyltransferase)	Cytoplasmic					0.000848519	0.00101498								3.3525e-05	3.92866e-05
P63417	yhbS	Uncharacterized N-acetyltransferase YhbS (EC 2.3.1.-)	Cytoplasmic					0.00417826	0.000178362								0.000165083	6.90384e-06
P64461	lsrG	Autoinducer 2 (AI-2) modifying protein LsrG	Cytoplasmic	0.00228298	0.000952003								8.88659e-05	3.83592e-05
P64554	queE	Queuosine Biosynthesis QueE Radical SAM	Cytoplasmic					0.00217374	0.000647328								8.58845e-05	2.50561e-05
P64636	yrfG	GMP/IMP nucleotidase YrfG (EC 3.1.3.5)	Cytoplasmic					0.000210785	0.000867871								8.32813e-06	3.35926e-05
P65556	yfcD	Putative Nudix hydrolase YfcD (EC 3.6.-.-)	Cytoplasmic				0.00301106	0.0019714								0.000121126	7.78902e-05
P65807	ygeY	Uncharacterized protein YgeY	Cytoplasmic	0.00169162		0.0039004				0.00211537		0.000515285	6.5847e-05		8.43791e-05				8.30432e-05		2.05051e-05				0.689284	-0.53683	0.589568
P67087	rsmI	rRNA small subunit methyltransferase I	Cytoplasmic	0.00115938	0.00021184								4.51293e-05	8.5357e-06
P67826	cutC	Copper homeostasis protein CutC	Cytoplasmic				0.00314888	0.000390975								0.000126671	1.54475e-05
P69451	fadD	Long-chain-fatty-acid--CoA ligase (EC 6.2.1.3)	Inner Membrane	0.00384264		0.0737215							0.000149576		0.00159485
P69786	ptsG	PTS system, glucose-specific IIB component (EC 2.7.1.69)	Inner Membrane		0.00196532	0.00661111								7.91889e-05	0.000143021
P69913	csrA	Carbon storage regulator	Cytoplasmic	0.0111757		0.0338176							0.000435017		0.000731591
P75691	yahK	Alcohol dehydrogenase (EC 1.1.1.1)	Inner Membrane				0.000598102		0.000418283							2.406e-05		1.61905e-05
P75713	allE	(S)-ureidoglycine aminohydrolase (UGHY) (UGlyAH) (EC 3.5.3.26)	Cytoplasmic	0.00146363		0.00208866							5.69724e-05		4.51849e-05
P75728	ubiF	2-octaprenyl-3-methyl-6-methoxy-1,4-benzoquinol hydroxylase (EC 1.14.13.-)	Cytoplasmic					0.00139369	0.00193737								5.50646e-05	7.49897e-05
P75782	rlmF	Ribosomal RNA large subunit methyltransferase F (EC 2.1.1.181) (23S rRNA mA1618 methyltransferase) (rRNA adenine N-6-methyltransferase)	Cytoplasmic					0.000399486	0.000693135								1.57837e-05	2.68291e-05
P75867	ycbZ	ATP-dependent protease La (EC 3.4.21.53) Type II	Inner Membrane				0.00841301		0.00133532							0.000338432		5.16863e-05
P75874	yccU	Uncharacterized protein YccU	Cytoplasmic				0.000683081	0.00105014								2.74784e-05	4.14911e-05
P75960	cobB	NAD-dependent protein deacetylase of SIR2 family	Cytoplasmic					0.00148582	0.00146625								5.87049e-05	5.67539e-05
P76038	puuD	Gamma-glutamyl-GABA hydrolase (EC 3.5.1.94)	Cytoplasmic	0.00899958		0.00588406							0.000350312		0.000127293
P76116	yncE	Uncharacterized protein YncE	Periplasmic					0.0016387	0.000504813								6.47453e-05	1.95398e-05
P76142	lsrB	Autoinducer 2 (AI-2) ABC transport system, periplasmic AI-2 binding protein LsrB	Periplasmic	0.000406753	0.00334467								1.5833e-05	0.000134768
P76347	yeeJ	Uncharacterized protein YeeJ	Outer Membrane		0.00396931	0.00830076								0.000159936	0.000179574
P76537	yfeY	Uncharacterized protein YfeY	Outer Membrane					0.00119453	0.00221955								4.7196e-05	8.59118e-05
P76576	yfgM	UPF0070 protein YfgM	Inner Membrane		0.00740683	0.00266059								0.000298445	5.75577e-05
P76594	pka	Protein acetyltransferase	Cytoplasmic		0.000831451	0.00472347				0.00402433		0.00170193		3.35018e-05	0.000102185				0.000157984		6.77262e-05				1.66346	0.734188	0.515632
P77279	fetA	YbbL ABC transporter ATP-binding protein	Inner Membrane					0.00148312	0.000941197								5.85983e-05	3.64308e-05
P77374	ynfE	Anaerobic dimethyl sulfoxide reductase chain A (EC 1.8.5.3)	Inner Membrane	0.00327566		0.00313998							0.000127506		6.79287e-05
P77499	sufC	Probable ATP-dependent transporter SufC	Inner Membrane				0.000678342	0.00483498								2.72878e-05	0.00019103
P77529	ydjN	L-cystine uptake protein TcyP	Inner Membrane		0.000869888	0.00547552								3.50506e-05	0.000118454
P77748	ydiJ	Uncharacterized protein YdiJ	Inner Membrane		0.00333152	0.00704703								0.000134237	0.000152452
P77775	yfcH	Epimerase family protein YfcH	Cytoplasmic				0.000623735		0.000145726							2.50911e-05		5.64062e-06
Q46920	queF	NADPH dependent preQ0 reductase (EC 1.7.1.13)	Cytoplasmic					0.00180322	0.00135895								7.12451e-05	5.26007e-05
Q47147	yafJ	Putative glutamine amidotransferase YafJ (EC 2.4.2.-)	Cytoplasmic					0.000719726	0.000595304								2.84364e-05	2.30424e-05
Q93K97	nudF	ADP-ribose pyrophosphatase (EC 3.6.1.13)	Inner Membrane					0.000468278	0.00481002								1.85017e-05	0.000186181

## Sheet: Table 1B
Additional Table S1B - The E.coli CyDisCo periplasmic fraction
Average abundance	Values based on 3 biological replicates
Normalization	Percentage of total peak intensity in the sample (by Baggerly et al., 2003)
													Normalized
				E.coli CyDisCo			E.coli CyDisCo sp-scFv			E.coli CyDisCo sp-scFv (misfolded)			E.coli CyDisCo			E.coli CyDisCo sp-scFv			E.coli CyDisCo sp-scFv (misfolded)			scFv VS control			mscFv VS control
Uniprot ID	Gene	Protein name	Protein subcellular localization (STEPdb)	C1	C2	C3	scFv1	scFv2	scFv3	mscFv1	mscFv2	mscFv3	C1	C2	C3	scFv1	scFv2	scFv3	mscFv1	mscFv2	mscFv3	FC	Log2 FC	p value	FC	Log2 FC	p value
P0ADU5	ygiW	Protein YgiW	Periplasmic				3077200	2940700	2105100							5.3019e-05	5.50514e-05	3.60863e-05				ON	ON
P39180	flu	Antigen 43 (AG43) (Fluffing protein) [Cleaved into: Antigen 43 alpha chain; Antigen 43 beta chain]	Outer Membrane				431790	335100	281360	49114000	43623000	53054000				7.43958e-06	6.27324e-06	4.82316e-06	0.000878982	0.000789852	0.000895969	ON	ON		ON	ON
P33343	yehD	Uncharacterized fimbrial-like protein YehD	Periplasmic				383660	762610	439800	659400	984800					6.61032e-06	1.42764e-05	7.53918e-06	1.18011e-05	1.78311e-05		ON	ON
P75938	flgF	Flagellar basal-body rod protein FlgF	Periplasmic				2299000	1529400	1529600	1899600	1703700	2994800				3.96109e-05	2.86311e-05	2.62209e-05	3.39967e-05	3.08477e-05	5.05758e-05	ON	ON		ON	ON
P0AGD1	sodC	Superoxide dismutase [Cu-Zn] precursor (EC 1.15.1.1)	Periplasmic				1758800	1499200	1675700	1297200	1709400					3.03035e-05	2.80658e-05	2.87253e-05	2.32157e-05	3.09509e-05		ON	ON
scFv	scFv	scFv construct					682860000	421370000	276290000							0.0117654	0.00788826	0.00473625				ON	ON
P04816	livK	High-affinity leucine-specific transport system, periplasmic binding protein LivK (TC 3.A.1.4.1)	Periplasmic				1032100	1123800	1064900	1148200						1.77827e-05	2.10381e-05	1.82548e-05	2.05491e-05			ON	ON
P39315	qorB	Quinone oxidoreductase 2 (EC 1.6.5.2)	Cytoplasmic	1175200	585790	575340				368700	550480	556430	2.61415e-05	1.26315e-05	1.19381e-05				6.59854e-06	9.96716e-06	9.39692e-06	OFF	OFF		0.511971	-0.965865	0.212207
P03817	mioC	Flavoprotein MioC	Cytoplasmic	3478400	3465100	1613700							7.73747e-05	7.47184e-05	3.34836e-05							OFF	OFF		OFF	OFF
P04391	argI	Ornithine carbamoyltransferase (EC 2.1.3.3)	Cytoplasmic	136100	169350	179390				145750	162520		3.02745e-06	3.65172e-06	3.72227e-06				2.60845e-06	2.94264e-06		OFF	OFF		0.800527	-0.320978	0.0882409
P05791	ilvD	Dihydroxy-acid dehydratase (EC 4.2.1.9)	Inner Membrane	362530	287790	704140				385640	617040		8.06424e-06	6.20565e-06	1.46106e-05				6.90171e-06	1.11723e-05		OFF	OFF		0.938731	-0.0912163	0.870804
P05852	tsaD	TsaD/Kae1/Qri7 protein, required for threonylcarbamoyladenosine t(6)A37 formation in tRNA	Cytoplasmic	449180	548560	577080							9.99171e-06	1.18287e-05	1.19742e-05							OFF	OFF		OFF	OFF
P06610	btuE	Glutathione peroxidase (EC 1.11.1.9)	Cytoplasmic	1244400	1170500	936700							2.76808e-05	2.52397e-05	1.94362e-05							OFF	OFF		OFF	OFF
P06616	era	GTP-binding protein Era	Inner Membrane	1487600	1485100	1289800							3.30907e-05	3.20234e-05	2.67628e-05							OFF	OFF		OFF	OFF
P06961	cca	tRNA nucleotidyltransferase (EC 2.7.7.21) (EC 2.7.7.25)	Cytoplasmic	263960	233010	146990							5.87161e-06	5.02443e-06	3.04999e-06							OFF	OFF		OFF	OFF
P06986	hisC	Histidinol-phosphate aminotransferase (EC 2.6.1.9)	Cytoplasmic	576450	495370	510500					529300	456530	1.28227e-05	1.06817e-05	1.05927e-05					9.58367e-06	7.70982e-06	OFF	OFF		0.760774	-0.39446	0.138724
P07648	recC	Exodeoxyribonuclease V gamma chain (EC 3.1.11.5)	Cytoplasmic	154070	119920	200230							3.42718e-06	2.58585e-06	4.15469e-06							OFF	OFF		OFF	OFF
P08245	yciH	Translation initiation factor SUI1-related protein	Cytoplasmic	817350	960460	1024100							1.81814e-05	2.07105e-05	2.12497e-05							OFF	OFF		OFF	OFF
P08373	murB	UDP-N-acetylenolpyruvoylglucosamine reductase (EC 1.1.1.158)	Cytoplasmic	1522200	1477200	981620				1122200			3.38603e-05	3.18531e-05	2.03682e-05				2.00838e-05			OFF	OFF
P08390	usg	Aspartate-semialdehyde dehydrogenase (EC 1.2.1.11)	Cytoplasmic	1425500	1108400	1251600				1406500	1056300		3.17093e-05	2.39006e-05	2.59702e-05				2.51718e-05	1.91257e-05		OFF	OFF		0.814491	-0.296029	0.308967
P09151	leuA	2-isopropylmalate synthase (EC 2.3.3.13)	Cytoplasmic	664950	543180	605050					825380		1.47914e-05	1.17127e-05	1.25546e-05					1.49446e-05		OFF	OFF
P0A6I3	coaA	Pantothenate kinase type II, eukaryotic (EC 2.7.1.33)	Cytoplasmic	2756600	2386300	2486300				1623500	1880900		6.13187e-05	5.14561e-05	5.15898e-05				2.90554e-05	3.40562e-05		OFF	OFF		0.575959	-0.795961	0.0111572
P0A6U5	rsmG	Ribosomal RNA small subunit methyltransferase G (EC 2.1.1.170) (16S rRNA 7-methylguanosine methyltransferase) (16S rRNA m7G methyltransferase) (Glucose-inhibited division protein B)	Cytoplasmic	934790	539860	720690							2.07938e-05	1.16411e-05	1.4954e-05							OFF	OFF		OFF	OFF
P0A720	tmk	Thymidylate kinase (EC 2.7.4.9)	Cytoplasmic	1949800	1741100	1530900							4.3372e-05	3.75436e-05	3.17656e-05							OFF	OFF		OFF	OFF
P0A7C6	pepE	Alpha-aspartyl dipeptidase Peptidase E (EC 3.4.13.21)	Cytoplasmic	2683100	3049200	3028900							5.96838e-05	6.57503e-05	6.28485e-05							OFF	OFF		OFF	OFF
P0A8A4	ppsR	Phosphoenolpyruvate synthase regulatory protein (PEP synthase regulatory protein) (PSRP) (EC 2.7.11.33) (EC 2.7.4.28) (Pyruvate, water dikinase regulatory protein)	Cytoplasmic	2052100	1598600	1626000							4.56476e-05	3.44708e-05	3.37389e-05							OFF	OFF		OFF	OFF
P0A8D0	nrdR	Ribonucleotide reductase transcriptional regulator NrdR	Cytoplasmic	1194400	2558800	2365200							2.65686e-05	5.51758e-05	4.9077e-05							OFF	OFF		OFF	OFF
P0A8D6	ymdB	O-acetyl-ADP-ribose deacetylase (EC 3.5.1.-) (Regulator of RNase III activity)	Cytoplasmic	651070	560340	691160							1.44826e-05	1.20827e-05	1.43413e-05							OFF	OFF		OFF	OFF
P0A8T1	prmA	Ribosomal protein L11 methyltransferase (EC 2.1.1.-)	Cytoplasmic	1371800	1300200	1323300						1039200	3.05148e-05	2.80364e-05	2.7458e-05						1.75499e-05	OFF	OFF
P0A8U0	syd	Protein Syd	Inner Membrane	719900	524890	445460							1.60137e-05	1.13183e-05	9.24312e-06							OFF	OFF		OFF	OFF
P0A8W5	yqgE	UPF0301 protein YqgE	Cytoplasmic	1098300	1678300	1407100					1019900	1120700	2.4431e-05	3.61894e-05	2.91968e-05					1.84666e-05	1.89262e-05	OFF	OFF		0.624483	-0.679265	0.0805187
P0A996	glpC	Anaerobic glycerol-3-phosphate dehydrogenase subunit C (EC 1.1.5.3)	Inner Membrane	236110	404270	528760							5.25211e-06	8.71733e-06	1.09716e-05							OFF	OFF		OFF	OFF
P0AAN9	iraP	Anti-adapter protein IraP	Cytoplasmic	1679700	1719800	2406200							3.73638e-05	3.70843e-05	4.99277e-05							OFF	OFF		OFF	OFF
P0AAQ2	yajD	Uncharacterized protein YajD	Cytoplasmic	2957000	1894000	3158300				1025000		1302600	6.57765e-05	4.08406e-05	6.55335e-05				1.83442e-05		2.19981e-05	OFF	OFF		0.351515	-1.50834	0.0407252
P0ABF4	eutM	Ethanolamine utilization protein EutM	Cytoplasmic	932100	1690800	3699900							2.07339e-05	3.64589e-05	7.67715e-05							OFF	OFF		OFF	OFF
P0ACB0	dnaB	Replicative DNA helicase (EC 3.6.1.-)	Cytoplasmic	279600	278910	330040							6.21952e-06	6.01417e-06	6.8482e-06							OFF	OFF		OFF	OFF
P0ACT6	uidR	Transcriptional repressor UidR	Cytoplasmic	784870	471610	486480							1.74589e-05	1.01694e-05	1.00943e-05							OFF	OFF		OFF	OFF
P0ADP2	yigI	Uncharacterized protein YigI	Inner Membrane	625590	638150	668390							1.39158e-05	1.37605e-05	1.38688e-05							OFF	OFF		OFF	OFF
P0ADQ2	yiiD	Uncharacterized protein YiiD	Inner Membrane	375340	282640	520420							8.34919e-06	6.0946e-06	1.07985e-05							OFF	OFF		OFF	OFF
P0AE37	astA	Arginine N-succinyltransferase (EC 2.3.1.109)	Cytoplasmic	532190	879330	560290							1.18382e-05	1.89611e-05	1.16258e-05							OFF	OFF		OFF	OFF
P0AEI6	nudJ	Nudix-like NDP and NTP phosphohydrolase YmfB	Cytoplasmic	1288300	968600	1031500							2.86574e-05	2.08861e-05	2.14032e-05							OFF	OFF		OFF	OFF
P0AES2	gudD	Glucarate dehydratase (EC 4.2.1.40)	Cytoplasmic	932420	851700	882250							2.07411e-05	1.83653e-05	1.83063e-05							OFF	OFF		OFF	OFF
P0AET8	hdhA	7-alpha-hydroxysteroid dehydrogenase (7-alpha-HSDH) (EC 1.1.1.159)	Cytoplasmic	1096400	794360	1175600					1121400		2.43887e-05	1.71289e-05	2.43932e-05					2.03044e-05		OFF	OFF
P0AEV9	hycI	Hydrogenase 3 maturation protease (EC 3.4.23.51) (HycI protease)	Cytoplasmic	315060	255780	277030							7.0083e-06	5.51542e-06	5.74826e-06							OFF	OFF		OFF	OFF
P0AF20	nagC	N-acetylglucosamine-6P-responsive transcriptional repressor NagC, ROK family	Cytoplasmic	309170	371180	326010				302360	398200		6.87728e-06	8.0038e-06	6.76458e-06				5.41127e-06	7.20993e-06		OFF	OFF		0.874623	-0.193267	0.488007
P0AF90	rraB	Ribonuclease E inhibitor RraB	Cytoplasmic	1707500	1532700	1416000							3.79822e-05	3.30498e-05	2.93814e-05							OFF	OFF		OFF	OFF
P0AFH0	ogt	Methylated-DNA--protein-cysteine methyltransferase (EC 2.1.1.63)	Cytoplasmic	653400	763250	1158900							1.45344e-05	1.64581e-05	2.40467e-05							OFF	OFF		OFF	OFF
P0AFI7	pdxH	Pyridoxamine 5'-phosphate oxidase (EC 1.4.3.5)	Inner Membrane	3609600	3668800	5883700					3329200		8.02931e-05	7.91108e-05	0.000122084					6.02795e-05		OFF	OFF
P0AFP6	ybgI	GTP cyclohydrolase 1 type 2 homolog (Radiation resistance protein YbgI)	Cytoplasmic	1173600	1204000	1498300							2.61059e-05	2.5962e-05	3.10891e-05							OFF	OFF		OFF	OFF
P0AG40	ribF	FMN adenylyltransferase (EC 2.7.7.2)	Cytoplasmic	1689100	1373000	1364700							3.75729e-05	2.96062e-05	2.8317e-05							OFF	OFF		OFF	OFF
P0AGG0	thiL	Thiamine-monophosphate kinase (EC 2.7.4.16)	Cytoplasmic	1097300	882820	892150							2.44087e-05	1.90364e-05	1.85118e-05							OFF	OFF		OFF	OFF
P0AGL7	rsmE	Ribosomal RNA small subunit methyltransferase E (EC 2.1.1.-)	Inner Membrane	306450	326810	609640							6.81678e-06	7.04705e-06	1.26498e-05							OFF	OFF		OFF	OFF
P0C079	relB	Antitoxin RelB	Cytoplasmic	1378100	546600	602840							3.06549e-05	1.17864e-05	1.25087e-05							OFF	OFF		OFF	OFF
P10371	hisA	Phosphoribosylformimino-5-aminoimidazole carboxamide ribotide isomerase (EC 5.3.1.16)	Cytoplasmic	662570	829550	685270							1.47384e-05	1.78877e-05	1.42191e-05							OFF	OFF		OFF	OFF
P12995	bioA	Adenosylmethionine-8-amino-7-oxononanoate aminotransferase (EC 2.6.1.62)	Cytoplasmic	1411600	1086500	1347100				892620			3.14001e-05	2.34283e-05	2.79518e-05				1.5975e-05			OFF	OFF
P15640	purD	Phosphoribosylamine--glycine ligase (EC 6.3.4.13)	Cytoplasmic	515270	560040	397130						499370	1.14618e-05	1.20762e-05	8.24029e-06						8.4333e-06	OFF	OFF
P17993	ubiG	Ubiquinone biosynthesis O-methyltransferase (2-octaprenyl-6-hydroxyphenol methylase) (EC 2.1.1.222) (3-demethylubiquinone-8 3-O-methyltransferase) (EC 2.1.1.64)	Cytoplasmic	905320	777470	793500							2.01382e-05	1.67647e-05	1.64648e-05							OFF	OFF		OFF	OFF
P19624	pdxA	4-hydroxythreonine-4-phosphate dehydrogenase (EC 1.1.1.262)	Cytoplasmic	544510	475330	372890							1.21123e-05	1.02496e-05	7.73732e-06							OFF	OFF		OFF	OFF
P20099	bisC	Biotin sulfoxide reductase (BDS reductase) (BSO reductase) (EC 1.-.-.-) (L-methionine-(S)-sulfoxide reductase) (Met-S-SO reductase) (EC 1.8.4.13)	Cytoplasmic	222130	232800	453740							4.94113e-06	5.0199e-06	9.41493e-06							OFF	OFF		OFF	OFF
P22939	ispA	Dimethylallyltransferase (EC 2.5.1.1)	Cytoplasmic	2434800	1650100	1931600					1349600		5.41605e-05	3.55813e-05	4.00799e-05					2.44363e-05		OFF	OFF
P23003	trmA	tRNA/tmRNA (uracil-C(5))-methyltransferase (EC 2.1.1.-) (EC 2.1.1.35) (tRNA (uracil(54)-C(5))-methyltransferase) (tRNA(m5U54)-methyltransferase) (RUMT) (tmRNA (uracil(341)-C(5))-methyltransferase)	Cytoplasmic	933500	866880	839480				831210	713760		2.07651e-05	1.86927e-05	1.74189e-05				1.4876e-05	1.29236e-05		OFF	OFF		0.733154	-0.447813	0.0426637
P23256	malY	Maltose regulon modulator	Cytoplasmic	509700	378680	599020							1.13379e-05	8.16553e-06	1.24294e-05							OFF	OFF		OFF	OFF
P23522	garL	2-dehydro-3-deoxyglucarate aldolase (EC 4.1.2.20)	Cytoplasmic	2174100	1663100	3208600				1407100	1330300		4.83614e-05	3.58617e-05	6.65772e-05				2.51825e-05	2.40868e-05		OFF	OFF		0.490079	-1.02891	0.102181
P23524	garK	Glycerate-2-kinase (EC 2.7.1.165)	Cytoplasmic	1805100	1338500	832060							4.01532e-05	2.88623e-05	1.72649e-05							OFF	OFF		OFF	OFF
P23908	argE	Acetylornithine deacetylase (EC 3.5.1.16)	Inner Membrane	904770	1013900	760610				551870	704970		2.0126e-05	2.18629e-05	1.57824e-05				9.87669e-06	1.27644e-05		OFF	OFF		0.587864	-0.766445	0.042444
P24193	hypE	[NiFe] hydrogenase metallocenter assembly protein HypE	Cytoplasmic	2957600	1902100	2805800							6.57898e-05	4.10152e-05	5.82193e-05							OFF	OFF		OFF	OFF
P25738	msyB	Acidic protein MsyB	Cytoplasmic	683760	560150	887780							1.52098e-05	1.20786e-05	1.84211e-05							OFF	OFF		OFF	OFF
P25745	mnmA	tRNA-specific 2-thiouridylase MnmA	Cytoplasmic	1148600	1116100	1026900							2.55498e-05	2.40666e-05	2.13078e-05							OFF	OFF		OFF	OFF
P26612	amyA	Cytoplasmic alpha-amylase (EC 3.2.1.1)	Cytoplasmic	297960	229680	266050							6.62792e-06	4.95262e-06	5.52043e-06							OFF	OFF		OFF	OFF
P27431	roxA	50S ribosomal protein L16 3-hydroxylase (EC 1.14.11.47) (Ribosomal oxygenase RoxA) (ROX)	Cytoplasmic	471660	364290	533050							1.04918e-05	7.85523e-06	1.10606e-05							OFF	OFF		OFF	OFF
P27828	wecB	UDP-N-acetylglucosamine 2-epimerase (EC 5.1.3.14)	Cytoplasmic	895370	892810	812070				576510	821430		1.99169e-05	1.92518e-05	1.68501e-05				1.03177e-05	1.48731e-05		OFF	OFF		0.674525	-0.568056	0.190355
P27829	wecC	UDP-N-acetyl-D-mannosamine dehydrogenase (EC 1.1.1.336) (UDP-ManNAc 6-dehydrogenase)	Outer Membrane	964340	675610	896180							2.14511e-05	1.45683e-05	1.85954e-05							OFF	OFF		OFF	OFF
P30749	moaE	Molybdenum cofactor biosynthesis protein MoaE	Cytoplasmic	1109500	1048200	1265400							2.46801e-05	2.26025e-05	2.62566e-05							OFF	OFF		OFF	OFF
P31060	modF	Putative molybdenum transport ATP-binding protein ModF (Photorepair protein PhrA)	Inner Membrane	699180	268300	204820							1.55528e-05	5.78539e-06	4.24994e-06							OFF	OFF		OFF	OFF
P31441	ade	Adenine deaminase (EC 3.5.4.2)	Cytoplasmic	123960	84369	91058							2.75741e-06	1.81926e-06	1.88942e-06							OFF	OFF		OFF	OFF
P31455	yidR	Uncharacterized protein YidR	Cytoplasmic	512960	575420	426670							1.14105e-05	1.24079e-05	8.85324e-06							OFF	OFF		OFF	OFF
P33018	yeiG	S-formylglutathione hydrolase (EC 3.1.2.12)	Cytoplasmic	1215700	1245700	1341900							2.70424e-05	2.68612e-05	2.78439e-05							OFF	OFF		OFF	OFF
P37051	purU	Formyltetrahydrofolate deformylase (EC 3.5.1.10)	Cytoplasmic	1825300	2116900	3090400				1466600			4.06026e-05	4.5647e-05	6.41246e-05				2.62474e-05			OFF	OFF
P37182	hybD	Hydrogenase 2 maturation protease (EC 3.4.23.-)	Cytoplasmic	777810	358180	1037700							1.73019e-05	7.72348e-06	2.15319e-05							OFF	OFF		OFF	OFF
P39286	rsgA	Ribosome small subunit-stimulated GTPase EngC	Inner Membrane	1377100	1309900	1770500					1273300		3.06327e-05	2.82456e-05	3.67372e-05					2.30548e-05		OFF	OFF
P39829	garD	D-galactarate dehydratase (EC 4.2.1.42)	Cytoplasmic	1529900	932880	1505500							3.40316e-05	2.01158e-05	3.12385e-05							OFF	OFF		OFF	OFF
P45568	dxr	1-deoxy-D-xylulose 5-phosphate reductoisomerase (EC 1.1.1.267)	Cytoplasmic	221890	240990	230220					226560	346270	4.93579e-06	5.1965e-06	4.77698e-06					4.10217e-06	5.84776e-06	OFF	OFF		1.00105	0.00151096	0.99621
P52612	fliI	Flagellum-specific ATP synthase FliI	Cytoplasmic	432380	492520	402430							9.618e-06	1.06203e-05	8.35027e-06							OFF	OFF		OFF	OFF
P52647	ydbK	Pyruvate-flavodoxin oxidoreductase (EC 1.2.7.-)	Cytoplasmic	466140	402120	463930							1.0369e-05	8.67097e-06	9.62637e-06							OFF	OFF		OFF	OFF
P65556	yfcD	Putative Nudix hydrolase YfcD (EC 3.6.-.-)	Cytoplasmic	1597600	1402200	1608200						927460	3.55375e-05	3.02358e-05	3.33695e-05						1.56628e-05	OFF	OFF
P67826	cutC	Copper homeostasis protein CutC	Cytoplasmic	392340	381600	531670							8.72734e-06	8.22849e-06	1.10319e-05							OFF	OFF		OFF	OFF
P69228	baeR	Response regulator BaeR	Cytoplasmic	411410	508450	279650							9.15154e-06	1.09638e-05	5.80263e-06							OFF	OFF		OFF	OFF
P75682	yagE	Probable 2-keto-3-deoxy-galactonate aldolase YagE (Probable KDGal aldolase YagE) (EC 4.1.2.-)	Cytoplasmic	446910	590720	733340							9.94121e-06	1.27378e-05	1.52165e-05							OFF	OFF		OFF	OFF
P75960	cobB	NAD-dependent protein deacetylase of SIR2 family	Cytoplasmic	2080500	1502900	1279400							4.62793e-05	3.24072e-05	2.65471e-05							OFF	OFF		OFF	OFF
P76008	ldcA	Muramoyltetrapeptide carboxypeptidase (EC 3.4.17.13)	Cytoplasmic	716110	886510	565230				382920		401700	1.59294e-05	1.91159e-05	1.17283e-05				6.85303e-06		6.78386e-06	OFF	OFF		0.437326	-1.19322	0.0546038
P76038	puuD	Gamma-glutamyl-GABA hydrolase (EC 3.5.1.94)	Cytoplasmic	3679200	5760600	3109900							8.18413e-05	0.000124217	6.45292e-05							OFF	OFF		OFF	OFF
P76085	paaK	Phenylacetate-coenzyme A ligase (EC 6.2.1.30) PaaF	Cytoplasmic	851070	555300	863370							1.89315e-05	1.1974e-05	1.79146e-05							OFF	OFF		OFF	OFF
P76149	sad	Succinate semialdehyde dehydrogenase [NAD(P)+] Sad (SSADH) (SSDH) (EC 1.2.1.16)	Cytoplasmic	1019500	1533600	1833800							2.26781e-05	3.30692e-05	3.80506e-05							OFF	OFF		OFF	OFF
P76187	ydhF	Oxidoreductase YdhF (EC 1.-.-.-)	Cytoplasmic	2023100	1629700	3000300				2253900	2818400		4.50025e-05	3.51414e-05	6.22551e-05				4.03375e-05	5.10308e-05		OFF	OFF		0.962454	-0.0552101	0.864011
P76216	astB	Succinylarginine dihydrolase (EC 3.5.3.23)	Cytoplasmic	4749100	6304200	4993100							0.000105641	0.000135938	0.000103605							OFF	OFF		OFF	OFF
P76290	cmoA	Carboxy-S-adenosyl-L-methionine synthase (Cx-SAM synthase) (EC 2.1.3.-)	Cytoplasmic	451050	281940	541750					284920		1.00333e-05	6.07951e-06	1.12411e-05					5.15885e-06		OFF	OFF
P76422	thiD	Hydroxymethylpyrimidine phosphate kinase ThiD (EC 2.7.4.7)	Cytoplasmic	1644600	1906500	1399400							3.6583e-05	4.11101e-05	2.9037e-05							OFF	OFF		OFF	OFF
P76535	murQ	N-acetylmuramic acid 6-phosphate etherase	Cytoplasmic	945560	643240	550940							2.10334e-05	1.38703e-05	1.14318e-05							OFF	OFF		OFF	OFF
P76621	csiD	Protein CsiD	Cytoplasmic	1409900	3630000	476330						555390	3.13623e-05	7.82742e-05	9.88366e-06						9.37935e-06	OFF	OFF
P77475	yqaB	Putative phosphatase YqaB	Cytoplasmic	674070	748640	736320							1.49942e-05	1.6143e-05	1.52784e-05							OFF	OFF		OFF	OFF
P77756	queC	Queuosine Biosynthesis QueC ATPase	Cytoplasmic	3873500	2494400	2482000						1786200	8.61634e-05	5.37871e-05	5.15005e-05						3.01651e-05	OFF	OFF
Q46803	ygeW	Uncharacterized protein YgeW	Cytoplasmic	607390	582700	759180							1.3511e-05	1.25648e-05	1.57527e-05							OFF	OFF		OFF	OFF
Q46893	ispD	2-C-methyl-D-erythritol 4-phosphate cytidylyltransferase (EC 2.7.7.60)	Cytoplasmic	819520	730490	525460							1.82297e-05	1.57517e-05	1.09031e-05							OFF	OFF		OFF	OFF
Q93K97	nudF	ADP-ribose pyrophosphatase (EC 3.6.1.13)	Inner Membrane	1115400	1139600	1046200					788660		2.48113e-05	2.45733e-05	2.17082e-05					1.42797e-05		OFF	OFF
P77754	spy	Periplasmic chaperone Spy (Spheroplast protein Y)	Periplasmic	1828800	1880200	2736300	13122000	14538000	12591000	12220000	11778000	6725800	4.06804e-05	4.0543e-05	5.67772e-05	0.000226087	0.000272159	0.000215839	0.000218698	0.00019515	0.000113584	5.1745	2.37142	0.00465016	4.76685	2.25304	0.0410363
P0A912	pal	Peptidoglycan-associated lipoprotein precursor	Outer Membrane	1952000	2311600	1275900	9893700	4383300	19395000	8591500	5735900	8297400	4.34209e-05	4.98453e-05	2.64744e-05	0.000170465	8.20575e-05	0.000332475	0.00015376	0.000103856	0.000140125	4.88553	2.28852	0.167593	3.32169	1.73192	0.01283
P0AEE1	dcrB	Protein DcrB	Inner Membrane	425510	756730		2478900		4603500				9.46519e-06	1.63175e-05		4.27105e-05		7.89146e-05				4.71732	2.23797	0.220021
P0ABX8	fliL	Flagellar biosynthesis protein FliL	Inner Membrane	725410	1240800		4154100		3989300		903450		1.61363e-05	2.67555e-05		7.15736e-05		6.83858e-05		1.63581e-05		3.26308	1.70623	0.0512789
P0ADY1	ppiD	Peptidyl-prolyl cis-trans isomerase D (PPIase D) (EC 5.2.1.8) (Rotamase D)	Inner Membrane	577780	1174200		4095100	470940	6025300		581540	1145500	1.28523e-05	2.53194e-05		7.0557e-05	8.81623e-06	0.000103287		1.05295e-05	1.93451e-05	3.19015	1.67363	0.268085	0.782636	-0.353587	0.64656
P75780	fiu	Catecholate siderophore receptor Fiu (Ferric iron uptake protein) (TonB-dependent receptor Fiu)	Outer Membrane	3739900	2729300	3231800	12760000	13806000	10784000	1218500	5315100	7958500	8.31916e-05	5.88523e-05	6.70586e-05	0.00021985	0.000258455	0.000184863	2.18072e-05	9.62369e-05	0.000134402	3.1715	1.66516	0.0122735	1.20728	0.271766	0.707698
P07017	tar	Methyl-accepting chemotaxis protein II (aspartate chemoreceptor protein)	Inner Membrane	7813500	14886000	803140	35528000	8185800	49626000	11925000	8565300	14499000	0.000173806	0.000320989	1.66648e-05	0.000612134	0.000153242	0.000850704	0.000213419	0.000155086	0.000244857	3.15974	1.65981	0.206368	1.19924	0.262118	0.741831
P21499	rnr	3'-to-5' exoribonuclease RNase R	Inner Membrane	5582000	3328500		11392000		24568000		55537000	61151000	0.000124168	7.17729e-05		0.00019628		0.000421152		0.00100557	0.00103271	3.15111	1.65586	0.300086	10.4025	3.37886	0.00431182
P42616	yqjC	Protein YqjC	Periplasmic		849260	708490	3257500	2444100	3037200		2694500	2689800		1.83127e-05	1.47009e-05	5.61255e-05	4.57548e-05	5.20646e-05		4.87875e-05	4.5425e-05	3.10872	1.63632	0.00240032	2.85375	1.51286	0.00656293
P0ABI8	cyoB	Cytochrome O ubiquinol oxidase subunit I (EC 1.10.3.-)	Inner Membrane	462060	875190		2060200		3183400	696840		844330	1.02782e-05	1.88718e-05		3.54965e-05		5.45708e-05	1.24712e-05		1.42589e-05	3.08978	1.6275	0.150908	0.916983	-0.125033	0.825894
P0AD59	ivy	Inhibitor of vertebrate lysozyme precursor	Periplasmic	1242400	2167900	2518800	11199000	5429500	5606600	4986700	5647500	10535000	2.76364e-05	4.67467e-05	5.22641e-05	0.000192955	0.000101643	9.611e-05	8.92458e-05	0.000102255	0.000177914	3.08501	1.62527	0.10006	2.91688	1.54443	0.0907067
P37648	yhjJ	Protein YhjJ, putative peptidase	Periplasmic	13928000	9186200	14088000	46516000	44195000	48595000	45587000	38080000	46629000	0.000309819	0.000198083	0.000292321	0.000801453	0.000827352	0.00083303	0.00081586	0.000689488	0.000787464	3.07644	1.62126	0.00222689	2.86522	1.51864	0.000681101
P39401	mdoB	Phosphoglycerol transferase I (EC 2.7.8.20)	Inner Membrane	4419500	5254400	5370200	20685000	18466000	14201000	6386500	13833000	19447000	9.83088e-05	0.000113301	0.00011143	0.000356395	0.000345693	0.000243438	0.000114298	0.000250465	0.000328418	2.92696	1.5494	0.027102	2.14581	1.10152	0.186727
P02943	lamB	Maltoporin (maltose/maltodextrin high-affinity receptor, phage lambda receptor protein)	Outer Membrane	32821000	51040000	46912000	158440000	124610000	169960000	143390000	109720000	130500000	0.000730081	0.00110058	0.000973406	0.00272986	0.00233276	0.00291351	0.00256622	0.00198662	0.00220387	2.84448	1.50817	0.00213373	2.40961	1.2688	0.00479448
P25718	malS	Periplasmic alpha-amylase (EC 3.2.1.1)	Periplasmic	488520	745910	822810	3277100	2092100	1723800		2468900	3106800	1.08668e-05	1.60842e-05	1.7073e-05	5.64632e-05	3.91651e-05	2.95499e-05		4.47027e-05	5.24672e-05	2.84341	1.50762	0.0678372	3.31081	1.72718	0.0336411
P21338	rna	Ribonuclease I precursor (EC 3.1.27.6)	Periplasmic	2360400	2922400	2277700	8627600	7487400	9784700	7111200	5765000	7562100	5.25055e-05	6.30161e-05	4.72614e-05	0.00014865	0.000140168	0.000167732	0.000127267	0.000104383	0.000127708	2.80466	1.48782	0.00146609	2.20759	1.14247	0.00392068
P09169	ompT	Protease 7 (EC 3.4.23.49) (Omptin) (Outer membrane protein 3B) (Protease A) (Protease VII)	Outer Membrane	2052700	2349200	1884700	11818000	4337000	5499700	7103600	7369700	6795000	4.56609e-05	5.06561e-05	3.91068e-05	0.00020362	8.11908e-05	9.42775e-05	0.000127131	0.000133438	0.000114753	2.79927	1.48505	0.170555	2.77147	1.47065	0.000686551
P0AG27	yibN	Uncharacterized protein YibN	Inner Membrane	574860	876430		2027200		3131300	1733900	948620	971010	1.27874e-05	1.88986e-05		3.49279e-05		5.36777e-05	3.10312e-05	1.7176e-05	1.63983e-05	2.79637	1.48355	0.176108	1.35929	0.442851	0.388485
P0AAI3	ftsH	ATP-dependent zinc metalloprotease FtsH (EC 3.4.24.-) (Cell division protease FtsH)	Inner Membrane	1279700	2001600		6686700	1041500	9386200		1607000	2626000	2.84661e-05	4.31608e-05		0.000115209	1.94974e-05	0.000160901		2.90968e-05	4.43475e-05	2.75137	1.46015	0.269521	1.02538	0.0361519	0.939436
P66948	bepA	Beta-barrel assembly-enhancing protease (EC 3.4.-.-)	Periplasmic	5354200	7254000	5859000	21037000	19988000	20608000	16605000	14163000	19173000	0.000119101	0.000156419	0.000121572	0.00036246	0.000374185	0.000353268	0.000297176	0.00025644	0.000323791	2.74474	1.45667	0.000478777	2.20958	1.14377	0.00431931
P37661	eptB	Phosphoethanolamine transferase specific for the outer Kdo residue of lipopolysaccharide	Inner Membrane	1732400	2462700	3686800	11197000	7651600	7215000	10006000	9710000	10158000	3.85361e-05	5.31035e-05	7.64997e-05	0.00019292	0.000143242	0.000123682	0.000179075	0.000175812	0.000171547	2.7349	1.45149	0.0242889	3.13094	1.6466	0.00675235
P0AEU7	skp	Outer membrane protein H precursor	Periplasmic	94559000	134420000	195410000	506320000	535420000	339410000	621480000	427820000	376390000	0.0021034	0.00289852	0.00405468	0.0087237	0.0100233	0.00581827	0.0111225	0.00774624	0.00635643	2.71242	1.43958	0.0365171	2.78528	1.47782	0.0474849
P00634	phoA	Alkaline phosphatase (EC 3.1.3.1)	Periplasmic	333750		557660	1564600	1267000	1517600	765170	835740	956630	7.42405e-06		1.15712e-05	2.69575e-05	2.37189e-05	2.60152e-05	1.36941e-05	1.51322e-05	1.61554e-05	2.6916	1.42846	0.0434236	1.5787	0.658735	0.200653
P76223	ynjB	Protein YnjB	Periplasmic	1019900	1603400	1162100	5355200	3247300	3824400	3920500	3352200	4735500	2.2687e-05	3.45743e-05	2.41131e-05	9.22681e-05	6.07911e-05	6.5559e-05	7.01643e-05	6.0696e-05	7.99725e-05	2.68657	1.42577	0.0303273	2.5909	1.37345	0.00467488
P31828	pqqL	Probable zinc protease PqqL (EC 3.4.24.-)	Periplasmic	316650	402880	663060	2375800	1446400	567620	797210	1018500		7.04367e-06	8.68736e-06	1.37582e-05	4.09341e-05	2.70773e-05	9.73031e-06	1.42675e-05	1.84413e-05		2.63627	1.3985	0.212674	1.66376	0.73445	0.123619
P05825	fepA	TonB-dependent receptor	Outer Membrane	572340	556270	754620	2014800	2168300	1768800		980800	1126800	1.27313e-05	1.19949e-05	1.56581e-05	3.47142e-05	4.05917e-05	3.03213e-05		1.77587e-05	1.90293e-05	2.61555	1.38711	0.0104815	1.36642	0.4504	0.0332844
P32160	yiiQ	Uncharacterized protein YiiQ	Periplasmic	475920	1393700	2143100	4601900	3968700	3855100	4213100	3494800	3371200	1.05865e-05	3.00525e-05	4.44685e-05	7.9289e-05	7.4296e-05	6.60853e-05	7.54009e-05	6.32779e-05	5.69324e-05	2.58109	1.36798	0.0315087	2.2984	1.20063	0.043802
Q47622	sapA	Peptide transport periplasmic protein SapA	Periplasmic	2323100	3102200	2870700	9440900	8311200	8177900	8696400	8721800	8139700	5.16758e-05	6.68932e-05	5.95659e-05	0.000162663	0.00015559	0.000140188	0.000155637	0.00015792	0.000137462	2.57356	1.36377	0.000646099	2.5319	1.34022	0.000621146
P0ABZ6	surA	Survival protein SurA precursor (Peptidyl-prolyl cis-trans isomerase SurA) (EC 5.2.1.8)	Periplasmic	47983000	64403000	59947000	184300000	169190000	185050000	168680000	156830000	171460000	0.00106735	0.00138873	0.00124388	0.00317542	0.00316732	0.00317218	0.00301883	0.00283961	0.00289559	2.57163	1.36268	0.0022779	2.36598	1.24244	0.00040338
P05458	ptrA	Protease III precursor (EC 3.4.24.55)	Periplasmic	7991700	6985900	11977000	33262000	27706000	22785000	25872000	19559000	14738000	0.00017777	0.000150638	0.000248518	0.000573092	0.00051867	0.000390587	0.000463025	0.000354141	0.000248893	2.56939	1.36143	0.0152866	1.84783	0.88583	0.101746
P00811	ampC	Beta-lactamase (EC 3.5.2.6)	Periplasmic	1016000	1323100	1039400	5691100	2300500	2606600	2347900	1644300	2054700	2.26002e-05	2.85302e-05	2.15671e-05	9.80555e-05	4.30665e-05	4.46831e-05	4.20198e-05	2.97722e-05	3.46995e-05	2.55586	1.35381	0.170463	1.46486	0.55076	0.0662084
P02942	tsr	Methyl-accepting chemotaxis protein I (serine chemoreceptor protein)	Inner Membrane	2556100	3083100		9581500	2473200	14937000	1952500	2552400	4729800	5.68587e-05	6.64813e-05		0.000165086	4.62995e-05	0.000256055	3.49434e-05	4.62146e-05	7.98762e-05	2.52656	1.33718	0.260785	0.870408	-0.200236	0.62365
P76116	yncE	Uncharacterized protein YncE	Periplasmic	60880000	66693000	60126000	179040000	193300000	203000000	233830000	190950000	199390000	0.00135423	0.00143811	0.00124759	0.00308479	0.00361867	0.00347989	0.0041848	0.0034574	0.00336727	2.52067	1.33381	0.00292892	2.72516	1.44634	0.00967605
P39099	degQ	Outer membrane stress sensor protease DegQ, serine protease	Periplasmic	1616900	1405800	3418900	7305400	8792000	7125900	24183000	19886000	11169500	3.59669e-05	3.03135e-05	9.16905e-05	0.00010864	0.000164591	0.000122154	0.000432798	0.000360062	0.000137965	3.60521	1.85008	0.00284393	8.57528	3.10018	0.0477521
P37329	modA	Molybdenum ABC transporter, periplasmic molybdenum-binding protein ModA (TC 3.A.1.8.1)	Periplasmic	72610000	83642000	79210000	288080000	216120000	213050000	174640000	196210000	223290000	0.00161516	0.00180358	0.00164358	0.00496351	0.00404587	0.00365217	0.00312549	0.00355264	0.00377089	2.50114	1.32258	0.0207523	2.06408	1.0455	0.0067506
P31554	lptD	Outer membrane protein Imp, required for envelope biogenesis	Outer Membrane	590780	741510	378740	2336400	803230	2152500		737780	858940	1.31415e-05	1.59893e-05	7.85871e-06	4.02553e-05	1.50369e-05	3.68988e-05		1.33585e-05	1.45057e-05	2.49235	1.31751	0.13605	1.12995	0.176257	0.574293
P33363	bglX	Periplasmic beta-glucosidase (EC 3.2.1.21)	Periplasmic	18481000	21077000	27629000	66938000	73497000	61531000	40087000	76177000	77385000	0.000411098	0.000454486	0.000573291	0.00115332	0.0013759	0.00105478	0.000717428	0.00137928	0.00130687	2.49083	1.31663	0.00694107	2.36545	1.24211	0.0821012
P0ADA1	tesA	Acyl-CoA thioesterase I (EC 3.1.2.-) (Lecithinase B) (Lysophospholipase L1) (EC 3.1.1.5) (Protease I)	Periplasmic	5750200	8326900	9885800	27361000	22998000	20709000	26340000	19173000	19966000	0.000127909	0.000179554	0.000205126	0.00047142	0.000430534	0.000355	0.000471401	0.000347152	0.000337183	2.45216	1.29405	0.00580194	2.2547	1.17294	0.0214153
P76115	yncD	Probable TonB-dependent receptor YncD	Outer Membrane	421910	444110	524910	1436100	1309300	1342800		941580	1328200	9.38511e-06	9.5764e-06	1.08917e-05	2.47435e-05	2.45107e-05	2.30187e-05		1.70485e-05	2.24305e-05	2.42094	1.27557	4.4742e-05	1.98366	0.988163	0.161622
P76002	pliG	Inhibitor of g-type lysozyme	Periplasmic	1852000	3172500	3684300	10172000	8598000	6652900	6143000	6098800	5397700	4.11965e-05	6.8409e-05	7.64478e-05	0.00017526	0.000160959	0.000114046	0.00010994	0.000110427	9.11557e-05	2.42008	1.27506	0.0227863	1.67437	0.743619	0.0383517
P07018	tap	Methyl-accepting chemotaxis protein IV (dipeptide chemoreceptor protein)	Inner Membrane	444750	573710		1050500	219030	3406300	433700	356410	700220	9.89317e-06	1.2371e-05		1.80997e-05	4.10035e-06	5.83918e-05	7.76183e-06	6.45327e-06	1.18252e-05	2.4132	1.27095	0.435794	0.779738	-0.358938	0.315539
P0ADZ7	yajC	UPF0092 membrane protein YajC	Inner Membrane	914500	1663700		3646100		4241300	1598500	899360		2.03424e-05	3.58746e-05		6.28209e-05		7.27056e-05	2.8608e-05	1.62841e-05		2.41077	1.2695	0.066277	0.798549	-0.324546	0.628101
P0ABB0	atpA	ATP synthase alpha chain (EC 3.6.3.14)	Inner Membrane	13099000	18412000	3858500	32145000	14632000	59466000	18181000	15711000	22598000	0.000291379	0.00039702	8.00624e-05	0.000553846	0.000273918	0.00101938	0.000325381	0.000284468	0.000381632	2.4037	1.26526	0.235152	1.29022	0.367613	0.513979
P17315	cirA	Colicin I receptor precursor	Outer Membrane	1186700	1040900	1071300	3354400	3568200	2684500		1676900	2247700	2.63973e-05	2.24451e-05	2.22291e-05	5.7795e-05	6.67985e-05	4.60185e-05		3.03625e-05	3.79589e-05	2.40057	1.26338	0.0265417	1.44196	0.528028	0.190442
P0AG80	ugpB	Glycerol-3-phosphate ABC transporter, periplasmic glycerol-3-phosphate-binding protein (TC 3.A.1.1.3)	Periplasmic	10054000	12663000	11176000	37449000	30058000	30962000	26068000	20140000	28572000	0.000223645	0.000273054	0.000231898	0.000645232	0.000562701	0.00053076	0.000466533	0.000364661	0.00048252	2.38636	1.25481	0.0039212	1.80308	0.85046	0.0215063
P69776	lpp	Major outer membrane lipoprotein Lpp (Braun lipoprotein) (Murein-lipoprotein)	Outer Membrane	170490000	250950000	262880000	468190000	344630000	1187200000	878220000	421040000	623420000	0.00379244	0.00541127	0.00545466	0.00806674	0.00645164	0.0203513	0.0157173	0.00762348	0.0105282	2.37883	1.25025	0.263526	2.31056	1.20824	0.107076
P0AGC3	slt	Soluble lytic murein transglycosylase precursor (EC 3.2.1.-)	Periplasmic	7229100	8307500	8848500	24926000	21833000	23380000	5387500	20231000	25738000	0.000160807	0.000179136	0.000183603	0.000429466	0.000408725	0.000400787	9.64188e-05	0.000366309	0.00043466	2.36651	1.24276	3.70116e-05	1.71406	0.777417	0.35078
P0A6J3	cysZ	Sulfate transporter, CysZ-type	Inner Membrane	18856000	25695000	26366000	81159000	63934000	57938000	18589000	51949000	72515000	0.000419439	0.000554065	0.000547084	0.00139834	0.00119688	0.00099319	0.000332683	0.000940605	0.00122462	2.35988	1.23871	0.0177428	1.64273	0.716093	0.340746
P45464	lpoA	Penicillin-binding protein activator LpoA (PBP activator LpoA) (Lipoprotein activator of PBP from the outer membrane A)	Outer Membrane	631770	759220	218840	1938900	802370	1941800		794540	1321900	1.40533e-05	1.63712e-05	4.54084e-06	3.34065e-05	1.50208e-05	3.32869e-05		1.43862e-05	2.23241e-05	2.33701	1.22466	0.108842	1.57486	0.655222	0.316638
P77774	bamB	Outer membrane protein YfgL, lipoprotein component of the protein assembly complex (forms a complex with YaeT, YfiO, and NlpB)	Outer Membrane	1244000	1532200	675560	4485200	1815400	3611400	1820500	2418900	1780500	2.76719e-05	3.3039e-05	1.40176e-05	7.72783e-05	3.39852e-05	6.19077e-05	3.25811e-05	4.37974e-05	3.00689e-05	2.31733	1.21247	0.106284	1.42445	0.510407	0.214324
P0AA91	yeaY	Starvation lipoprotein Slp paralog	Outer Membrane		827840	997880	2727500	2256600	2601700	2606500	1818600			1.78508e-05	2.07056e-05	4.69938e-05	4.22447e-05	4.45991e-05	4.66479e-05	3.29281e-05		2.31414	1.21048	0.00205479	2.06388	1.04536	0.193312
P0ADV7	mlaC	Uncharacterized ABC transporter, auxiliary component YrbC	Periplasmic	44455000	50008000	47777000	164480000	129000000	105600000	117420000	110380000	119990000	0.000988872	0.00107833	0.000991354	0.00283393	0.00241494	0.00181023	0.00210144	0.00199857	0.00202638	2.30798	1.20663	0.0450131	2.00303	1.00219	1.80331e-05
P33590	nikA	Nickel ABC transporter, periplasmic nickel-binding protein NikA (TC 3.A.1.5.3)	Periplasmic	1387200	1826200	1951400	5350500	4499100	4587000	4147700	7466400	8521100	3.08573e-05	3.93786e-05	4.04908e-05	9.21871e-05	8.42254e-05	7.86317e-05	7.42304e-05	0.000135189	0.000143903	2.30337	1.20374	0.000857337	3.19094	1.67398	0.0636401
P0AEX9	malE	Maltose/maltodextrin ABC transporter, substrate binding periplasmic protein MalE	Periplasmic	644020000	812910000	726440000	3137000000	1269100000	1699000000	1422700000	1149000000	1360600000	0.0143258	0.0175289	0.0150733	0.0540493	0.0237582	0.0291248	0.0254617	0.0208042	0.0229776	2.27864	1.18818	0.163999	1.47553	0.561229	0.0135904
P06971	fhuA	Ferric hydroxamate outer membrane receptor FhuA	Outer Membrane	1303300	1483300	1222500	4323700	2394000	4490700	494370	2513700	3601900	2.8991e-05	3.19846e-05	2.53664e-05	7.44957e-05	4.48169e-05	7.69809e-05	8.84762e-06	4.55138e-05	6.08284e-05	2.27344	1.18488	0.0665851	1.33411	0.415879	0.597489
P23827	eco	Ecotin	Periplasmic	38451000	44843000	54873000	158690000	112360000	108930000	121820000	96986000	75428000	0.000855317	0.000966956	0.00113859	0.00273417	0.00210343	0.00186731	0.00218018	0.00175606	0.00127382	2.26451	1.1792	0.0309182	1.75964	0.815281	0.0922014
P78067	ynjE	Thiosulfate sulfurtransferase YnjE (EC 2.8.1.1)	Periplasmic	6896800	8121000	7006300	20589000	18001000	22101000	19053000	20671000	22309000	0.000153415	0.000175114	0.000145378	0.000354741	0.000336988	0.000378862	0.000340987	0.000374276	0.000376751	2.25907	1.17573	0.000316694	2.30428	1.20432	0.00021402
P37387	xylF	Xylose ABC transporter, periplasmic xylose-binding protein XylF	Periplasmic	21632000	30311000	26949000	88264000	70881000	56808000	50832000	38186000	46619000	0.000481189	0.0006536	0.000559181	0.00152076	0.00132693	0.00097382	0.000909728	0.000691408	0.000787296	2.25594	1.17373	0.0376144	1.40996	0.495655	0.0481014
P50466	aer	Aerotaxis sensor receptor protein	Inner Membrane	665240	1156400		3197500	273390	4252700	766510	432350	981090	1.47978e-05	2.49356e-05		5.50917e-05	5.118e-06	7.29011e-05	1.37181e-05	7.82826e-06	1.65685e-05	2.2334	1.15924	0.35081	0.639509	-0.644963	0.36628
P0ADW3	yhcB	Inner membrane protein YhcB	Inner Membrane	1047300	1732700		3593200	1257100	6859900	1813900	1338900	1561900	2.32965e-05	3.73624e-05		6.19095e-05	2.35335e-05	0.000117594	3.24629e-05	2.42425e-05	2.63772e-05	2.23147	1.15799	0.303595	0.913113	-0.131135	0.77393
P0AD96	livJ	Branched-chain amino acid ABC transporter, amino acid-binding protein (TC 3.A.1.4.1)	Periplasmic	2525000	3086500	2386500	7521400	6229500	8004600	6740200	6229200	8420500	5.61669e-05	6.65546e-05	4.95189e-05	0.000129591	0.000116619	0.000137217	0.000120628	0.000112788	0.000142204	2.22612	1.15453	0.000980073	2.18079	1.12485	0.00574543
P31545	efeB	Ferrous iron transport peroxidase EfeB	Periplasmic	357000	495230	476330	1379400	1104800	1108500	1031300	879290	1104300	7.94123e-06	1.06787e-05	9.88366e-06	2.37665e-05	2.06824e-05	1.90022e-05	1.84569e-05	1.59207e-05	1.86493e-05	2.22608	1.1545	0.00432472	1.86036	0.895581	0.00246232
P0AB24	efeO	Ferrous iron transport periplasmic protein EfeO, contains peptidase-M75 domain and (frequently) cupredoxin-like domain	Periplasmic	8922100	14425000	16181000	32023000	38157000	35882000	33788000	31370000	35169000	0.000198466	0.000311048	0.000335749	0.000551744	0.000714318	0.0006151	0.000604696	0.000567995	0.000593929	2.22553	1.15415	0.00573329	2.09002	1.06352	0.0139193
P64506	yebY	Uncharacterized protein YebY	Periplasmic	4173400	8228200	8743500	21514000	16894000	17956000	20441000	15689000	20264000	9.28345e-05	0.000177426	0.000181424	0.000370678	0.000316264	0.000307807	0.000365828	0.00028407	0.000342216	2.20231	1.13902	0.00924618	2.19647	1.13519	0.00947529
P07024	ushA	5'-nucleotidase (EC 3.1.3.5)	Periplasmic	14021000	14640000	15422000	44392000	36726000	36842000	33478000	33770000	36413000	0.000311888	0.000315684	0.00032	0.000764857	0.000687529	0.000631557	0.000599148	0.00061145	0.000614938	2.19924	1.13701	0.0100404	1.92654	0.946012	1.78422e-05
P13035	glpD	Aerobic glycerol-3-phosphate dehydrogenase (EC 1.1.5.3)	Inner Membrane	2104000	2530300	1264400	5874600	3612800	6517900	3265700	3945300	3951500	4.68021e-05	5.45612e-05	2.62358e-05	0.000101217	6.76334e-05	0.000111732	5.84455e-05	7.14348e-05	6.67324e-05	2.19894	1.13681	0.0403353	1.54086	0.623739	0.0958665
P03841	malM	Maltose operon periplasmic protein MalM	Periplasmic	46330000	52514000	53397000	160750000	112970000	134010000	146840000	138650000	127710000	0.00103058	0.00113237	0.00110797	0.00276966	0.00211485	0.00229724	0.00262796	0.00251044	0.00215675	2.19564	1.13464	0.0196034	2.23031	1.15724	0.00855673
P0AFX9	rseB	Sigma factor RpoE negative regulatory protein RseB precursor	Periplasmic	6570200	7985400	8942300	21903000	21463000	18988000	21921000	16940000	19341000	0.00014615	0.00017219	0.000185549	0.00037738	0.000401798	0.000325498	0.000392315	0.000306721	0.000326628	2.1923	1.13245	0.00425998	2.0355	1.02538	0.0109236
P23865	prc	Tail-specific protease (EC 3.4.21.102) (C-terminal-processing peptidase) (PRC protein) (Protease Re)	Inner Membrane	56702000	62787000	66001000	187070000	152940000	151310000	70237000	142430000	147440000	0.0012613	0.00135388	0.0013695	0.00322315	0.00286311	0.0025938	0.00125702	0.00257888	0.00248995	2.17836	1.12324	0.0112185	1.58754	0.666795	0.208192
P0ABB4	atpD	ATP synthase beta chain (EC 3.6.3.14)	Inner Membrane	15594000	27426000	10073000	37492000	21340000	84007000	26039000	20362000	30875000	0.000346878	0.000591391	0.000209011	0.000645973	0.000399495	0.00144007	0.000466014	0.000368681	0.000521413	2.16647	1.11534	0.289451	1.18202	0.241255	0.608996
P10384	fadL	Long-chain fatty acid transport protein (Outer membrane FadL protein) (Outer membrane flp protein)	Outer Membrane	5555900	6388600	4938100	18355000	10201000	16222000	10333000	9583300	10785000	0.000123587	0.000137758	0.000102464	0.00031625	0.000190968	0.000278082	0.000184927	0.000173518	0.000182136	2.15855	1.11006	0.0542744	1.48589	0.571329	0.0202808
P0A855	tolB	tolB protein precursor, periplasmic protein involved in the tonb-independent uptake of group A colicins	Periplasmic	63254000	70651000	66753000	174750000	179930000	171270000	175730000	160630000	167050000	0.00140704	0.00152346	0.0013851	0.00301088	0.00336838	0.00293596	0.003145	0.00290842	0.00282112	2.1585	1.11003	0.00338359	2.05639	1.04011	0.00112972
P39265	alsB	D-allose-binding periplasmic protein (ALBP)	Periplasmic	587640	1618100	1892300	3550200	3485000	3574900	3452000	3761900	3556500	1.30717e-05	3.48913e-05	3.92645e-05	6.11686e-05	6.52409e-05	6.1282e-05	6.17796e-05	6.81141e-05	6.00617e-05	2.15175	1.10551	0.0504179	2.1777	1.12281	0.0420572
P33913	yejA	Uncharacterized protein YejA	Periplasmic	1410400	1914200	2306300	5904200	4576500	4161300	3354600	3323900	3903200	3.13734e-05	4.12762e-05	4.78548e-05	0.000101727	8.56743e-05	7.13342e-05	6.00365e-05	6.01836e-05	6.59167e-05	2.14711	1.10239	0.0179654	1.54465	0.627278	0.0310224
P0A940	bamA	Outer membrane protein assembly factor YaeT precursor	Outer Membrane	13046000	16920000	10693000	43714000	23496000	40204000	25097000	21023000	31886000	0.0002902	0.000364848	0.000221876	0.000753176	0.000439857	0.000689189	0.000449155	0.000380649	0.000538487	2.14639	1.10191	0.0557281	1.56033	0.641852	0.0570151
P0AEL6	fepB	Ferric enterobactin-binding periplasmic protein FepB (TC 3.A.1.14.2)	Periplasmic		1388600	964740	3532600	3162500	2374200	2847400	2299600	2632700		2.99426e-05	2.0018e-05	6.08654e-05	5.92036e-05	4.06992e-05	5.09593e-05	4.16373e-05	4.44607e-05	2.14527	1.10116	0.0395602	1.82887	0.870955	0.0906487
P0A917	ompX	Outer membrane protein X	Outer Membrane	19157000	23113000	13292000	58026000	29985000	58367000	43073000	33612000	31960000	0.000426135	0.000498389	0.000275804	0.000999766	0.000561334	0.00100054	0.000770867	0.000608589	0.000539736	2.13412	1.09364	0.0725105	1.59889	0.677072	0.0649961
P15028	fecB	Iron(III) dicitrate transport system, periplasmic iron-binding protein FecB (TC 3.A.1.14.1)	Periplasmic	8967800	9361600	10582000	25982000	25495000	22199000	26760000	17865000	23662000	0.000199483	0.000201865	0.000219572	0.00044766	0.000477279	0.000380542	0.000478917	0.000323469	0.000399601	2.10249	1.0721	0.0122523	1.93582	0.952941	0.047235
P77619	yfeW	Beta-lactamase class C and other penicillin binding proteins	Periplasmic		395230	476180	1090700	916760	1277700	1173400	1151100	1507300		8.5224e-06	9.88055e-06	1.87923e-05	1.71622e-05	2.19027e-05	2.10001e-05	2.08422e-05	2.54551e-05	2.09594	1.0676	0.00949304	2.43792	1.28565	0.00617057
P76297	flhE	Flagellar protein FlhE	Periplasmic	3537200	3466200	4419500	9898100	8573600	10268000	15130000	10901000	12314000	7.86827e-05	7.47421e-05	9.17029e-05	0.000170541	0.000160502	0.000176017	0.000270778	0.000197377	0.000207957	2.06855	1.04862	0.000237283	2.7582	1.46373	0.0203216
P13036	fecA	Iron(III) dicitrate transport protein FecA	Outer Membrane	5808100	6640800	7275500	17210000	15063000	17107000	1578400	12051000	17215000	0.000129197	0.000143196	0.000150964	0.000296522	0.000281987	0.000293253	2.82483e-05	0.000218199	0.000290725	2.05916	1.04206	9.95224e-05	1.26884	0.343508	0.676132
P36548	amiA	N-acetylmuramoyl-L-alanine amidase (EC 3.5.1.28)	Periplasmic	1004200	1467300	1287300	3657100	3078900	2557300	2451800	2143900	3030000	2.23378e-05	3.16396e-05	2.6711e-05	6.30104e-05	5.76385e-05	4.3838e-05	4.38793e-05	3.88181e-05	5.11702e-05	2.03855	1.02754	0.023926	1.65907	0.730376	0.0193584
P32176	fdoG	Formate dehydrogenase O alpha subunit (EC 1.2.1.2)	Periplasmic	333680	387050	630960	940370	1179000	1150300	1404400	829290		7.42249e-06	8.34601e-06	1.30922e-05	1.62022e-05	2.20715e-05	1.97188e-05	2.51342e-05	1.50154e-05		2.00939	1.00676	0.016613	2.08673	1.06124	0.261115
P77348	mppA	Periplasmic Murein Peptide-Binding Protein MppA	Periplasmic	57426000	61864000	54075000	157640000	126180000	136780000	127530000	114280000	145970000	0.0012774	0.00133398	0.00112204	0.00271608	0.00236215	0.00234472	0.00228237	0.00206919	0.00246512	1.98824	0.991495	0.00281462	1.82586	0.868573	0.00371902
P0A6F5	groL	Heat shock protein 60 family chaperone GroEL	Inner Membrane	107540000	114680000	15246000	187970000	191680000	202130000	45729000	58199000	157790000	0.00239216	0.00247286	0.000316349	0.00323865	0.00358834	0.00346497	0.000818401	0.00105377	0.00266474	1.98634	0.990115	0.134425	0.87562	-0.191623	0.82607
P0AEG6	dsbC	Thiol:disulfide interchange protein DsbC	Periplasmic	10987000	11520000	11175000	25791000	31366000	23675000	22343000	22787000	23800000	0.000244398	0.000248407	0.000231877	0.000444369	0.000587187	0.000405844	0.000399867	0.000412589	0.000401931	1.98349	0.98804	0.0488608	1.67575	0.744807	2.10458e-05
P0AC44	sdhD	Succinate dehydrogenase hydrophobic membrane anchor protein	Inner Membrane	691870	1037500		1130000		3219500				1.53902e-05	2.23718e-05		1.94695e-05		5.51896e-05				1.9771	0.983385	0.485954
P39325	ytfQ	ABC transporter periplasmic-binding protein YtfQ	Periplasmic	2889300	4339900	4374900	8676400	8760600	10288000	7582800	5911200	7086000	6.42706e-05	9.35819e-05	9.07775e-05	0.000149491	0.000164003	0.00017636	0.000135708	0.00010703	0.000119667	1.97021	0.978352	0.0030274	1.45761	0.543604	0.0392528
P77202	dsbG	Thiol:disulfide interchange protein DsbG precursor	Periplasmic	2369500	2776500	2532200	5105300	6131000	7080700	5202700	5828400	6874700	5.27079e-05	5.987e-05	5.25422e-05	8.79624e-05	0.000114775	0.000121379	9.31115e-05	0.000105531	0.000116099	1.96292	0.972999	0.0297018	1.90614	0.930651	0.0101305
P0ADA5	yajG	Uncharacterized lipoprotein YajG	Outer Membrane	9034300	11095000	13549000	28890000	22128000	29024000	32634000	23641000	24293000	0.000200962	0.000239243	0.000281136	0.000497764	0.000414247	0.000497538	0.000584043	0.000428051	0.000410257	1.95407	0.966479	0.0035309	1.97181	0.979524	0.0364369
P0ABK9	nrfA	Cytochrome c552 precursor (EC 1.7.2.2)	Periplasmic	736000	1176900	1469300	3280800	2257100	2394700	2378600	3640300	3851000	1.63718e-05	2.53777e-05	3.04874e-05	5.65269e-05	4.2254e-05	4.10507e-05	4.25692e-05	6.59124e-05	6.50352e-05	1.93574	0.952883	0.026562	2.40205	1.26427	0.0288326
P04949	fliC	Flagellar biosynthesis protein FliC	Outer Membrane	6974000000	5986300000	6641600000	16496000000	13416000000	16199000000	16905000000	14936000000	17790000000	0.155132	0.129083	0.137811	0.28422	0.251154	0.277688	0.302545	0.270436	0.300435	1.92657	0.946034	0.000721535	2.06958	1.04934	0.000484873
P75788	ybiR	Inner membrane protein YbiR	Inner Membrane	22150000	24706000	28207000	67807000	58416000	49077000	55818000	41923000	49868000	0.000492712	0.000532739	0.000585284	0.00116829	0.00109358	0.000841293	0.000998962	0.000759071	0.000842164	1.92655	0.946018	0.030231	1.61429	0.690902	0.0301058
P05704	trg	Methyl-accepting chemotaxis protein III (ribose and galactose chemoreceptor protein)	Inner Membrane	2028600	3844100		7021800	1800300	12459000	3345000	2164900	3220400	4.51249e-05	8.28908e-05		0.000120983	3.37025e-05	0.000213576	5.98647e-05	3.91984e-05	5.43857e-05	1.91779	0.939447	0.380254	0.799114	-0.323527	0.617843
P0C0V0	degP	HtrA protease/chaperone protein	Periplasmic	5027100	6673900	7873000	20068000	19663000	16649000	45119000	46067000	24243000	0.000111824	0.00014391	0.00026711	0.000345764	0.000368101	0.000285402	0.000807484	0.000834104	0.000409413	2.88035	1.52624	0.00112453	5.89706	2.56	0.0446079
P39172	znuA	High-affinity zinc uptake system protein ZnuA	Periplasmic	9717300	14503000	13137000	33018000	25907000	27852000	31865000	25182000	24361000	0.000216155	0.00031273	0.000272588	0.000568888	0.000484992	0.000477447	0.00057028	0.000455953	0.000411405	1.91064	0.934057	0.00390444	1.79375	0.842976	0.0267031
P75797	gsiB	Glutathione-binding protein GsiB	Periplasmic	21703000	18357000	17602000	49622000	43769000	40788000	39052000	32798000	41510000	0.000482769	0.000395834	0.000365235	0.000854968	0.000819377	0.0006992	0.000698905	0.000593851	0.000701015	1.90824	0.932245	0.00396697	1.60292	0.680701	0.00744419
P39187	ytfJ	Uncharacterized protein YtfJ	Periplasmic	13868000	32029000	40644000	72038000	70256000	55961000	61688000	60564000	69081000	0.000308484	0.000690646	0.000843347	0.00124119	0.00131523	0.0009593	0.00110402	0.00109659	0.00116663	1.90815	0.932171	0.0514747	1.82756	0.869919	0.0828359
P0ABJ1	cyoA	Cytochrome O ubiquinol oxidase subunit II (EC 1.10.3.-)	Inner Membrane	4528200	8068000	2254600	14401000	4673200	16095000	7182800	5028100	7605000	0.000100727	0.000173971	4.67821e-05	0.000248124	8.74846e-05	0.000275905	0.000128549	9.10404e-05	0.000128432	1.90218	0.927655	0.248207	1.08256	0.114446	0.837738
P0A910	ompA	Outer membrane protein A precursor	Outer Membrane	97955000	146340000	32872000	214610000	80462000	351920000	138610000	116900000	134680000	0.00217894	0.00315555	0.000682081	0.00369765	0.00150629	0.00603272	0.00248067	0.00211663	0.00227446	1.86762	0.901199	0.325042	1.14214	0.191737	0.73142
P13029	katG	Peroxidase (EC 1.11.1.7)	Cytoplasmic	67850000	82531000	25304000	144310000	122420000	136340000	14383000	42047000	96382000	0.00150928	0.00177963	0.000525048	0.00248641	0.00229176	0.00233718	0.000257409	0.000761316	0.00162769	1.86561	0.899648	0.0986776	0.693876	-0.52725	0.520238
P31550	thiB	Thiamin ABC transporter, substrate-binding component	Periplasmic	5243900	4308100	4666700	11224000	10041000	11064000	11306000	10453000	12980000	0.000116647	9.28961e-05	9.68322e-05	0.000193385	0.000187972	0.000189662	0.000202341	0.000189265	0.000219205	1.86379	0.898241	0.00512655	1.99367	0.995425	0.000980131
P19926	agp	Glucose-1-phosphatase (G1Pase) (EC 3.1.3.10)	Periplasmic	32585000	45336000	44025000	98630000	84176000	93318000	81257000	78631000	90447000	0.000724832	0.000977586	0.000913502	0.00169936	0.00157582	0.00159969	0.00145424	0.00142372	0.00152746	1.86354	0.898042	0.00326846	1.68408	0.751959	0.00808972
P13482	treA	Trehalase (EC 3.2.1.28)	Periplasmic	489380	918620	622980	1659400	1428500	1503900	1215000	1315800	1380100	1.08859e-05	1.98083e-05	1.29266e-05	2.85908e-05	2.67422e-05	2.57803e-05	2.17446e-05	2.38243e-05	2.33069e-05	1.85951	0.894922	0.0344268	1.57897	0.658979	0.0823667
P0AFM2	proX	L-proline glycine betaine binding ABC transporter protein ProX (TC 3.A.1.12.1)	Periplasmic	39233000	52368000	52898000	132790000	122290000	69148000	159840000	105470000	116230000	0.000872712	0.00112922	0.00109761	0.00228792	0.00228933	0.00118536	0.00286062	0.00190967	0.00196288	1.85918	0.894666	0.131345	2.17231	1.11923	0.0512288
P0ADS9	yggN	Uncharacterized protein YggN	Periplasmic	7524400	6509700		19085000	14003000	15389000	12803000	14173000	13414000	0.000167375	0.00014037		0.000328827	0.000262143	0.000263803	0.000229132	0.000256621	0.000226534	1.85169	0.888845	0.0152652	1.54303	0.625762	0.0366577
P60438	rplC	LSU ribosomal protein L3p (L3e)	Cytoplasmic	14139000	28605000	6795800	31342000	16889000	65802000	19777000	17981000	26038000	0.000314513	0.000616813	0.00014101	0.000540011	0.00031617	0.001128	0.000353944	0.00032557	0.000439726	1.85033	0.887785	0.351595	1.04374	0.0617624	0.922053
P02924	araF	L-arabinose-binding periplasmic protein precursor AraF (TC 3.A.1.2.2)	Periplasmic	6541200	7965600	7958700	19483000	15327000	15670000	14278000	13649000	18574000	0.000145505	0.000171763	0.00016514	0.000335685	0.000286929	0.00026862	0.00025553	0.000247133	0.000313675	1.84747	0.88555	0.0119621	1.69222	0.758914	0.0225291
P0ACB7	hemY	Protein HemY	Inner Membrane	689790	2022700		2427800		3908700			2101900	1.53439e-05	4.36158e-05		4.18301e-05		6.70041e-05			3.54966e-05	1.84591	0.884331	0.319833
P0A9M0	lon	ATP-dependent protease La (EC 3.4.21.53) Type I	Cytoplasmic	6713900	7636500	1891400	13188000	8793000	15112000	423030	4037300	11348000	0.000149346	0.000164667	3.92458e-05	0.000227224	0.000164609	0.000259054	7.57087e-06	7.31006e-05	0.000191644	1.84252	0.881683	0.117059	0.770865	-0.375449	0.708696
P33136	mdoG	Glucans biosynthesis protein G precursor	Periplasmic	40207000	45489000	51977000	107810000	107000000	90835000	139200000	124520000	96786000	0.000894378	0.000980885	0.0010785	0.00185753	0.00200309	0.00155712	0.00249123	0.0022546	0.00163451	1.83418	0.875135	0.0144115	2.16007	1.11108	0.04159
P0AE91	creA	Protein CreA (Catabolite regulation protein A)	Periplasmic	4700700	6246500	7985000	17745000	12006000	12002000	17454000	17742000	16900000	0.000104564	0.000134694	0.000165686	0.00030574	0.000224758	0.000205742	0.00031237	0.000321242	0.000285405	1.81813	0.862454	0.0481497	2.26949	1.18237	0.00252689
P16700	cysP	Sulfate and thiosulfate binding protein CysP	Periplasmic	41912000	46527000	48947000	118920000	110850000	72272000	97918000	69075000	88601000	0.000932304	0.00100327	0.00101563	0.00204895	0.00207517	0.00123891	0.00175242	0.00125069	0.00149628	1.81723	0.861743	0.0981906	1.5246	0.608426	0.0662962
P46130	ybhC	Pectinesterase (EC 3.1.1.11)	Outer Membrane	377060	434540		815070	602700	1342800	700840	530220	616180	8.38745e-06	9.37004e-06		1.40433e-05	1.12828e-05	2.30187e-05	1.25428e-05	9.60033e-06	1.0406e-05	1.815	0.859972	0.175683	1.22198	0.289226	0.148679
P75937	flgE	Flagellar hook protein FlgE	Outer Membrane	12451000	12239000	11125000	31789000	20087000	27793000	40305000	24662000	38532000	0.000276964	0.000263911	0.000230839	0.000547712	0.000376039	0.000476436	0.000721329	0.000446538	0.000650723	1.81438	0.85948	0.0437927	2.35656	1.23668	0.0480563
P0AFK9	potD	ABC transporter, periplasmic spermidine putrescine-binding protein PotD (TC 3.A.1.11.1)	Periplasmic	38476000	50570000	49632000	103830000	107300000	91165000	121570000	104640000	129250000	0.000855873	0.00109045	0.00102984	0.00178895	0.00200871	0.00156278	0.00217571	0.00189464	0.00218276	1.80112	0.848896	0.0113655	2.10106	1.07112	0.00110655
P06129	btuB	Vitamin B12 transporter BtuB (Cobalamin receptor) (Outer membrane cobalamin translocator)	Outer Membrane	3670300	4906100	4893000	12710000	7516700	9321400	6340500	6019800	8468300	8.16434e-05	0.000105791	0.000101528	0.000218988	0.000140716	0.00015979	0.000113474	0.000108996	0.000143012	1.7978	0.84623	0.0712275	1.26481	0.338921	0.129883
P0AEU0	hisJ	Histidine ABC transporter, histidine-binding periplasmic protein precursor HisJ (TC 3.A.1.3.1)	Periplasmic	23163000	24843000	24186000	60262000	50292000	46760000	48786000	42502000	57630000	0.000515245	0.000535693	0.00050185	0.00103829	0.000941491	0.000801574	0.000873112	0.000769555	0.000973248	1.7912	0.840927	0.0250591	1.68466	0.752454	0.02386
P64534	rcnB	Uncharacterized protein YohN precursor	Periplasmic	1346600	3159800	2393900	6202500	2551700	6334800	8034900	5513300	8266700	2.99542e-05	6.81352e-05	4.96725e-05	0.000106867	4.77691e-05	0.000108593	0.000143799	9.98255e-05	0.000139607	1.78144	0.833043	0.187091	2.59357	1.37494	0.0131538
P31697	fimC	chaperone FimC	Periplasmic	1351800	1494500	1500200	3573700	2562800	3279000	2945900	3188400	3731400	3.00699e-05	3.22261e-05	3.11286e-05	6.15735e-05	4.79769e-05	5.62096e-05	5.27221e-05	5.77302e-05	6.30154e-05	1.77427	0.827222	0.0235696	1.85677	0.892793	0.00974425
P33235	flgK	Flagellar hook-associated protein FlgK	Outer Membrane	4178700	3804400	3902000	10127000	7806500	7698100	9765100	8130300	8029800	9.29524e-05	8.20348e-05	8.0965e-05	0.000174484	0.000146142	0.000131963	0.000174764	0.00014721	0.000135606	1.76826	0.822327	0.0261722	1.78775	0.838149	0.0201333
P75839	ycaP	UPF0702 transmembrane protein YcaP	Inner Membrane	1784600	1690400	2113100	3734100	4355900	3829900	1098200	4736600	4309900	3.96972e-05	3.64503e-05	4.3846e-05	6.43371e-05	8.15446e-05	6.56533e-05	1.96542e-05	8.57624e-05	7.2785e-05	1.76289	0.81794	0.0202807	1.48509	0.570553	0.43883
P0A927	tsx	Nucleoside-specific channel-forming protein tsx	Outer Membrane	4219600	3559600	3684500	8087200	8037400	8442600	8357900	6643500	6621400	9.38622e-05	7.67561e-05	7.64519e-05	0.000139339	0.000150464	0.000144726	0.000149579	0.000120289	0.000111821	1.75873	0.814531	0.00206669	1.54486	0.62748	0.0403842
P0AEG4	dsbA	Periplasmic thiol:disulfide interchange protein DsbA	Periplasmic	30345000	41453000	36169000	70752000	79926000	79500000	77971000	58285000	62634000	0.000675004	0.000893857	0.000750493	0.00121903	0.00149625	0.00136281	0.00139543	0.00105533	0.00105775	1.75829	0.814173	0.00533329	1.51271	0.597136	0.0515596
P0AG82	pstS	Phosphate ABC transporter, periplasmic phosphate-binding protein PstS (TC 3.A.1.7.1)	Periplasmic	15390000	17281000	19373000	37463000	34687000	38957000	42966000	39137000	44766000	0.00034234	0.000372633	0.000401982	0.000645473	0.000649358	0.000667813	0.000768952	0.000708627	0.000756002	1.75714	0.813227	0.00124414	1.99971	0.999788	0.000124544
P0ABJ9	cydA	Cytochrome d ubiquinol oxidase subunit I (EC 1.10.3.-)	Inner Membrane	172680	306690		392830		674810				3.84115e-06	6.6132e-06		6.76831e-06		1.15678e-05				1.75392	0.810584	0.318747
P00550	mtlA	PTS system, mannitol-specific IIA component	Inner Membrane	319630	999220		1185200		1740600				7.10996e-06	2.15463e-05		2.04205e-05		2.98379e-05				1.75384	0.810515	0.353766
P21513	rne	Ribonuclease E (EC 3.1.26.12)	Inner Membrane	561740	1980300		2638000		2953100	905730			1.24955e-05	4.27015e-05		4.54517e-05		5.06229e-05	1.62096e-05			1.74058	0.799566	0.400364
P0AFL3	ppiA	Peptidyl-prolyl cis-trans isomerase A (PPIase A) (EC 5.2.1.8) (Cyclophilin A) (Rotamase A)	Periplasmic	12305000	11462000	13610000	34955000	24626000	19314000	19294000	17631000	11515000	0.000273717	0.000247157	0.000282402	0.000602261	0.000461011	0.000331086	0.0003453	0.000319232	0.000194464	1.73584	0.795635	0.125776	1.06937	0.0967575	0.731594
P0AG78	sbp	Sulfate-binding protein Sbp	Periplasmic	3218400	7427400	4131700	13369000	6941900	11074000	11098000	10424000	13251000	7.15912e-05	0.000160158	8.57312e-05	0.000230343	0.000129956	0.000189834	0.000198618	0.00018874	0.000223781	1.73281	0.793112	0.125226	1.92497	0.944835	0.0561161
P23843	oppA	Oligopeptide ABC transporter, periplasmic oligopeptide-binding protein OppA (TC 3.A.1.5.1)	Periplasmic	2011600000	2415500000	2228700000	5631000000	3813700000	4461000000	4074700000	3246500000	3984900000	0.0447467	0.0520858	0.0462447	0.09702	0.0713944	0.0764718	0.072924	0.0587821	0.0672965	1.71157	0.775318	0.0407086	1.39088	0.475994	0.0268068
P0ABX5	flgG	Flagellar basal-body rod protein FlgG	Periplasmic	4399300	4697400	2883200	8019400	8764800	8201700	12204000	11334000	9911500	9.78595e-05	0.000101291	5.98253e-05	0.000138171	0.000164081	0.000140596	0.000218412	0.000205217	0.000167384	1.71	0.773998	0.0242152	2.28212	1.19038	0.00577055
P30860	artJ	Arginine ABC transporter, periplasmic arginine-binding protein ArtJ	Periplasmic	1664400	1818500	1562400	3131300	3428500	3921600	2870400	2937200	3305300	3.70235e-05	3.92126e-05	3.24192e-05	5.39511e-05	6.41832e-05	6.72252e-05	5.13709e-05	5.31819e-05	5.58195e-05	1.70594	0.770569	0.0113497	1.47597	0.561667	0.00346237
P0C0T5	mepA	Penicillin-insensitive murein endopeptidase (EC 3.4.24.-) (D-alanyl-D-alanine-endopeptidase) (DD-endopeptidase)	Periplasmic	764450	720550	842180	1871100	1300400		1356400	832010	1095700	1.70047e-05	1.55373e-05	1.74749e-05	3.22383e-05	2.43441e-05		2.42752e-05	1.50646e-05	1.8504e-05	1.6969	0.762902	0.202047	1.15649	0.209748	0.435379
P75936	flgD	Flagellar basal-body rod modification protein FlgD	Outer Membrane	8801400	7631900	9573600	21017000	17491000	15070000	22482000	22256000		0.000195781	0.000164568	0.000198648	0.000362115	0.00032744	0.000258334	0.000402355	0.000402974		1.6957	0.761877	0.0388798	2.161	1.1117	0.0025185
P26648	ftsP	Cell division protein FtsP	Periplasmic	3248200	4385600	3522600	7984700	7356200	7549200	8352400	6855100	8117800	7.2254e-05	9.45673e-05	7.30926e-05	0.000137573	0.000137712	0.000129411	0.000149481	0.000124121	0.000137092	1.68684	0.754321	0.00977531	1.71184	0.775547	0.00530992
P0A8X2	yceI	Protein YceI	Periplasmic	2211200	3318100	2477500	4970300	5058400	6345800	5115500	3801400	3986800	4.91867e-05	7.15486e-05	5.14072e-05	8.56364e-05	9.46958e-05	0.000108782	9.15509e-05	6.88293e-05	6.73286e-05	1.6795	0.748034	0.0164868	1.32279	0.403587	0.155645
P76177	ydgH	Protein YdgH	Periplasmic	57511000	71926000	82284000	169530000	142240000	118800000	148640000	136060000	141900000	0.00127929	0.00155095	0.00170736	0.00292094	0.0026628	0.00203651	0.00266018	0.00246354	0.00239639	1.67935	0.747907	0.0415251	1.65729	0.728823	0.00457267
P77318	ydeN	N-acetylgalactosamine-6-sulfatase (EC 3.1.6.4)	Periplasmic	2715500	3655300	4470400	7946700	6873100	7208300	9066700	9176300	9041100	6.04045e-05	7.88197e-05	9.27591e-05	0.000136919	0.000128668	0.000123567	0.000162265	0.000166149	0.000152685	1.67751	0.746318	0.018669	2.07385	1.05231	0.00558856
P61316	lolA	Outer membrane lipoprotein carrier protein LolA	Periplasmic	38873000	34171000	35187000	66268000	67522000	83802000	146690000	170700000	169190000	0.000864704	0.000736834	0.000730117	0.00114177	0.00126405	0.00143656	0.00262528	0.00309075	0.00285726	1.64792	0.720645	0.0137281	3.67691	1.87849	0.00199385
P0ABH9	clpA	ATP-dependent Clp protease ATP-binding subunit ClpA	Cytoplasmic	5598900	6339100	4586400	12328000	11185000	9400800	1736900	7795500	8638900	0.000124544	0.000136691	9.5166e-05	0.000212407	0.000209389	0.000161151	3.10849e-05	0.000141148	0.000145893	1.63565	0.709864	0.0249758	0.892606	-0.163905	0.772332
P0AEE5	mglB	Galactose/methyl galactoside ABC transport system, D-galactose-binding periplasmic protein MglB (TC 3.A.1.2.3)	Periplasmic	482380000	555940000	521370000	1071500000	1072100000	936650000	1069400000	1037300000	1125400000	0.0107302	0.0119878	0.0108182	0.0184615	0.0200702	0.0160563	0.0191388	0.0187817	0.0190056	1.62773	0.702865	0.0177959	1.69745	0.763368	0.00159279
P0A7U7	rpsT	SSU ribosomal protein S20p	Cytoplasmic	16163000	15937000	10553000	26130000	30218000	27949000	57979000	10718000		0.000359535	0.000343652	0.000218971	0.00045021	0.000565696	0.00047911	0.00103764	0.000194063		1.62122	0.697076	0.0301682	2.00351	1.00253	0.597524
P0AC02	bamD	Probable component of the lipoprotein assembly complex (forms a complex with YaeT, YfgL, and NlpB)	Outer Membrane	1951300	2301300	1496300	3212200	2714500	5511200	2889800	2478500	2757100	4.34054e-05	4.96232e-05	3.10476e-05	5.5345e-05	5.08168e-05	9.44746e-05	5.17181e-05	4.48765e-05	4.65615e-05	1.61704	0.693356	0.198821	1.15378	0.206362	0.367611
P45955	cpoB	TPR repeat containing exported protein	Periplasmic	14413000	16064000	16715000	36240000	32215000	23827000	33936000	27187000	31934000	0.000320608	0.00034639	0.00034683	0.000624401	0.000603081	0.00040845	0.000607345	0.000492256	0.000539297	1.61362	0.6903	0.0922212	1.61655	0.692914	0.019368
P06959	aceF	Dihydrolipoamide acetyltransferase component of pyruvate dehydrogenase complex (EC 2.3.1.12)	Inner Membrane	27430000	30486000	3217400	42746000	20216000	60345000	4866900	11296000	27012000	0.000610162	0.000657374	6.67598e-05	0.000736497	0.000378454	0.00103445	8.71018e-05	0.000204529	0.000456175	1.61089	0.687858	0.368146	0.56045	-0.835343	0.433338
P31063	yedD	Uncharacterized lipoprotein YedD	Outer Membrane	1168000	1413400	1470300	2889100	2023500	2839800	3610300	2251900	1927200	2.59814e-05	3.04773e-05	3.05082e-05	4.97781e-05	3.78809e-05	4.86807e-05	6.46127e-05	4.07736e-05	3.25463e-05	1.56772	0.648668	0.0354277	1.58604	0.665426	0.217127
P0ADS6	yggE	Uncharacterized protein YggE	Periplasmic	400170	518010	1271200	1116000	2158900	738320	8614000	11825000	2159800	8.90151e-06	1.11699e-05	2.63769e-05	1.92283e-05	4.04157e-05	1.26565e-05	0.000154163	0.000214107	3.64744e-05	1.55658	0.638377	0.445106	8.71386	3.12331	0.147814
P68679	rpsU	SSU ribosomal protein S21p	Cytoplasmic	8813200	9182100	15921000	14882000	23407000	25106000	18445000	18439000	14410000	0.000196044	0.000197995	0.000330355	0.000256411	0.000438191	0.000430375	0.000330106	0.000333862	0.000243354	1.55299	0.63505	0.151685	1.25253	0.324842	0.325801
P45523	fkpA	FKBP-type peptidyl-prolyl cis-trans isomerase FkpA precursor (EC 5.2.1.8)	Periplasmic	122690000	157190000	136850000	277960000	247080000	260750000	306800000	257390000	304470000	0.00272916	0.00338951	0.00283958	0.00478915	0.00462546	0.00446985	0.00549073	0.00466038	0.00514185	1.54991	0.632182	0.00673944	1.70714	0.771579	0.00285085
P0AE22	aphA	NMN phosphatase (EC 3.1.3.5)	Periplasmic	24314000	29406000	29441000	69927000	48164000	37641000	56397000	55792000	47548000	0.000540849	0.000634086	0.000610889	0.00120482	0.000901654	0.000645253	0.00100932	0.00101019	0.000802984	1.54087	0.623746	0.181563	1.5805	0.660382	0.0247341
P30859	artI	Arginine ABC transporter, periplasmic arginine-binding protein ArtI	Periplasmic	15282000	22475000	20173000	33404000	35821000	37810000	32646000	36790000	47172000	0.000339938	0.000484631	0.000418582	0.000575538	0.000670587	0.00064815	0.000584258	0.000666131	0.000796635	1.52377	0.607644	0.0166609	1.64664	0.719526	0.0285679
P0ABA6	atpG	ATP synthase gamma chain (EC 3.6.3.14)	Inner Membrane	2587200	4313300		4603900	2854300	12305000	3838900	2265200	4941500	5.75505e-05	9.30083e-05		7.93235e-05	5.34339e-05	0.000210936	6.87039e-05	4.10144e-05	8.34514e-05	1.52186	0.605832	0.514412	0.855346	-0.225421	0.665308
P0ADB1	osmE	Osmotically-inducible lipoprotein E (Activator of ntr-like gene protein)	Outer Membrane	1276500	2412000	1722800	4319000	2456700	3244500	5653000	4035200	2188400	2.83949e-05	5.20103e-05	3.57474e-05	7.44147e-05	4.59906e-05	5.56182e-05	0.00010117	7.30626e-05	3.69574e-05	1.51545	0.599747	0.142734	1.81822	0.862523	0.224284
Q46863	ygiS	Probable deoxycholate-binding periplasmic protein YgiS	Periplasmic	56205000	65405000	67929000	132890000	107770000	107510000	108080000	101780000	125990000	0.00125024	0.00141034	0.0014095	0.00228964	0.00201751	0.00184297	0.00193428	0.00184286	0.0021277	1.51106	0.595558	0.0211662	1.45079	0.536842	0.00602634
P06996	ompC	Outer membrane protein C (Outer membrane protein 1B) (Porin OmpC)	Outer Membrane	802840000	923540000	779770000	1957900000	1227900000	1433000000	1762100000	1430800000	1606400000	0.0178586	0.0199144	0.0161799	0.0337339	0.0229869	0.0245649	0.0315359	0.0259065	0.0271287	1.5066	0.591299	0.101409	1.5675	0.648462	0.0112113
P36672	treB	PTS system, trehalose-specific IIC component (EC 2.7.1.69)	Inner Membrane	1352400	1777700	2730600	1484200		5803800	1235500		2412500	3.00832e-05	3.83328e-05	5.66589e-05	2.55722e-05		9.94905e-05	2.21115e-05		4.0742e-05	1.49985	0.584821	0.672811	0.75379	-0.407766	0.476941
P00722	lacZ	Beta-galactosidase (EC 3.2.1.23)	Cytoplasmic	47464000	42727000	28353000	72929000	76650000	67052000	41882000	43395000	43843000	0.00105581	0.000921328	0.000588314	0.00125654	0.00143493	0.00114943	0.000749552	0.000785723	0.000740415	1.49716	0.582231	0.0719129	0.887054	-0.172906	0.559426
P0A903	bamC	Outer membrane protein NlpB, lipoprotein component of the protein assembly complex (forms a complex with YaeT, YfiO, and YfgL)	Outer Membrane	981700	2191600	1538200	2579100	1619400	4404300	2763400		1598000	2.18373e-05	4.72578e-05	3.1917e-05	4.44369e-05	3.0316e-05	7.54998e-05	4.94559e-05		2.69868e-05	1.48747	0.572863	0.35801	1.13515	0.182886	0.769133
P0A6S3	flgI	Flagellar P-ring protein FlgI	Periplasmic	2398600	3300300	2068700	6144700	3558400	4391200	4708400	4923900	5473700	5.33553e-05	7.11648e-05	4.29247e-05	0.000105871	6.6615e-05	7.52753e-05	8.42651e-05	8.91537e-05	9.24391e-05	1.47966	0.565264	0.14703	1.58773	0.66697	0.0485266
P0ADV1	lptA	LptA, protein essential for LPS transport across the periplasm	Periplasmic	6867700	10118000	11278000	18520000	19307000	12342000	17027000	25680000	21414000	0.000152767	0.000218176	0.000234014	0.000319093	0.000361437	0.00021157	0.000304728	0.00046497	0.000361637	1.47465	0.560371	0.153658	1.87011	0.903121	0.0446377
P0AEM9	fliY	Cystine ABC transporter, periplasmic cystine-binding protein FliY	Periplasmic	313330000	389000000	362920000	598810000	649260000	637400000	606290000	516940000	683400000	0.00696982	0.00838806	0.00753045	0.0103173	0.0121545	0.0109265	0.0108506	0.00935988	0.0115412	1.45918	0.54516	0.0080539	1.38724	0.472221	0.024362
P0A998	ftnA	Bacterial non-heme ferritin (EC 1.16.3.2) (Ferritin-1)	Cytoplasmic	10370000	12871000	4403800	15651000	18646000	14523000	4489800	9230100	13266000	0.000230674	0.000277539	9.13771e-05	0.000269661	0.000349062	0.000248958	8.03529e-05	0.000167123	0.000224034	1.44712	0.533188	0.252551	0.786388	-0.346687	0.576259
P06612	topA	DNA topoisomerase 1 (EC 5.99.1.2) (DNA topoisomerase I) (Omega-protein) (Relaxing enzyme) (Swivelase) (Untwisting enzyme)	Cytoplasmic	4500400	5412500	4678300	9262500	10004000	6225000	6465200	6994400	7772100	0.000100108	0.00011671	9.70729e-05	0.000159589	0.00018728	0.000106711	0.000115706	0.000126643	0.000131254	1.44502	0.53109	0.181561	1.19023	0.25124	0.0644085
P64596	yraP	Uncharacterized protein YraP	Outer Membrane	4301500	12079000	17354000	23930000	14937000	19856000	25687000	21361000	14503000	9.5684e-05	0.000260461	0.000360089	0.000412305	0.000279628	0.000340377	0.000459714	0.000386769	0.000244925	1.4413	0.527374	0.310247	1.52382	0.607688	0.280084
P0AED9	dcm	DNA-cytosine methyltransferase (EC 2.1.1.37) (M.EcoDcm)	Cytoplasmic	2705500	2573600	2743500	4866500	4758100	4343600	3543000	3399200	5163200	6.0182e-05	5.54949e-05	5.69266e-05	8.3848e-05	8.9074e-05	7.44593e-05	6.34082e-05	6.1547e-05	8.71954e-05	1.43323	0.519274	0.0200038	1.22912	0.297628	0.249512
P02925	rbsB	Ribose ABC transport system, periplasmic ribose-binding protein RbsB (TC 3.A.1.2.1)	Periplasmic	334970000	399330000	365840000	568570000	613150000	731960000	614480000	637520000	784400000	0.00745118	0.00861081	0.00759104	0.00979625	0.0114785	0.0125475	0.0109972	0.0115431	0.0132468	1.42993	0.515945	0.0349486	1.51301	0.597418	0.0126351
P0A7X3	rpsI	SSU ribosomal protein S9p (S16e)	Cytoplasmic	54961000	78407000	26252000	87711000	60917000	132140000	59340000	58624000	66599000	0.00122257	0.0016907	0.000544719	0.00151123	0.0011404	0.00226518	0.00106199	0.00106146	0.00112472	1.42187	0.507788	0.358582	0.939324	-0.090305	0.853102
P0A7T7	rpsR	SSU ribosomal protein S18p	Cytoplasmic	31122000	31714000	14117000	39784000	19811000	76462000	30865000	33308000	48089000	0.000692288	0.000683853	0.000292922	0.000685463	0.000370872	0.00131073	0.000552384	0.000603085	0.000812121	1.4182	0.504063	0.504736	1.17886	0.23739	0.560156
P09551	argT	Lysine-arginine-ornithine-binding periplasmic protein precursor (TC 3.A.1.3.1)	Periplasmic	101950000	115780000	118440000	181750000	197890000	195070000	181680000	148730000	230540000	0.00226781	0.00249658	0.00245758	0.00313148	0.0037046	0.00334395	0.00325148	0.00269295	0.00389333	1.40959	0.495277	0.016144	1.3622	0.445938	0.123167
P0A9K3	ybeZ	Phosphate starvation-inducible protein PhoH, predicted ATPase	Inner Membrane	2191300	2262800	482840	2147400	2073700	4418400	853690	1268500	2230700	4.8744e-05	4.87931e-05	1.00187e-05	3.69989e-05	3.88207e-05	7.57415e-05	1.52783e-05	2.29679e-05	3.76718e-05	1.40914	0.494814	0.462253	0.705847	-0.502573	0.519912
P0A6C1	nfo	Endonuclease IV (EC 3.1.21.2)	Cytoplasmic		622640	717640	976560	1231300		1064600	956310	1160100		1.34261e-05	1.48908e-05	1.68258e-05	2.30505e-05		1.90529e-05	1.73152e-05	1.95916e-05	1.40822	0.493872	0.302439	1.31747	0.397768	0.0291296
P0A7V8	rpsD	SSU ribosomal protein S4p (S9e)	Cytoplasmic	43249000	69158000	14923000	82472000	32355000	105900000	37867000	32576000	44651000	0.000962045	0.00149126	0.000309646	0.00142096	0.000605702	0.00181537	0.000677697	0.000589831	0.00075406	1.39055	0.475658	0.50661	0.731676	-0.450723	0.545741
P31133	potF	Putrescine ABC transporter putrescine-binding protein PotF (TC 3.A.1.11.2)	Periplasmic	1978600	2446800	2521700	3553800	3484600	4649300	4289800	3340100	4319000	4.40126e-05	5.27607e-05	5.23243e-05	6.12306e-05	6.52334e-05	7.96997e-05	7.67736e-05	6.04769e-05	7.29387e-05	1.38274	0.467534	0.0574189	1.40974	0.495431	0.0334192
P0A905	slyB	Outer membrane lipoprotein SlyB	Outer Membrane	12864000	15793000	14742000	31734000	12869000	29181000	25435000	20983000	13026000	0.000286151	0.000340547	0.000305891	0.000546765	0.000240914	0.000500229	0.000455204	0.000379925	0.000219981	1.381	0.465717	0.338767	1.13138	0.178082	0.61904
P0ABT2	dps	Iron-binding ferritin-like antioxidant protein	Cytoplasmic	145370000	153980000	209540000	252280000	324610000	265030000	247560000	368150000	254040000	0.00323366	0.00332029	0.00434787	0.00434669	0.00607686	0.00454322	0.00443052	0.00666584	0.00429019	1.37287	0.457194	0.117975	1.41137	0.497101	0.18199
P0AGG4	trxC	Thioredoxin-2 (Trx-2) (EC 1.8.1.8) (Protein-disulfide reductase)	Cytoplasmic	8636300	7664300	8566900	11996000	16697000	12558000	9184500	12497000	9411800	0.000192109	0.000165266	0.00017776	0.000206687	0.000312576	0.000215273	0.000164373	0.000226275	0.000158945	1.37262	0.45693	0.184454	1.02702	0.0384602	0.849518
P0AG48	rplU	LSU ribosomal protein L21p	Cytoplasmic	36913000	44736000	13063000	48197000	20441000	93914000	43542000	38656000	30444000	0.000821105	0.000964648	0.000271052	0.000830416	0.000382666	0.0016099	0.000779261	0.000699918	0.000514134	1.37251	0.456815	0.579894	0.96913	-0.0452372	0.932119
P0AFH8	osmY	Osmotically inducible protein OsmY	Periplasmic	3478100	5230600	4596100	8312300	7027200	6798200	6552900	12852000	17066000	7.7368e-05	0.000112788	9.53673e-05	0.000143218	0.000131553	0.000116537	0.000117276	0.000232702	0.000288208	1.37049	0.454693	0.0555435	2.23515	1.16037	0.139667
P0AG59	rpsN	SSU ribosomal protein S14p (S29e)	Cytoplasmic	2907600	4594000	3593300	6444900		6058200		5086700		6.46776e-05	9.9061e-05	7.45596e-05	0.000111043		0.000103851		9.21014e-05		1.35268	0.435824	0.099933
P33940	mqo	Malate:quinone oxidoreductase (EC 1.1.5.4)	Inner Membrane	6991900	5238000	6356200	11554000	10997000	7776100	10302000	10459000	8794900	0.00015553	0.000112948	0.000131889	0.000199071	0.000205869	0.0001333	0.000184372	0.000189374	0.000148527	1.34437	0.42693	0.176374	1.30449	0.383484	0.0847558
P22523	mukB	Chromosome partition protein MukB	Cytoplasmic	1971800	3022000	212510	2911000	2438900	3293800	798030	332360	1743800	4.38614e-05	6.51638e-05	4.4095e-06	5.01554e-05	4.56574e-05	5.64633e-05	1.42822e-05	6.01781e-06	2.94491e-05	1.34241	0.424828	0.544268	0.43857	-1.18912	0.35853
P0A7Z4	rpoA	DNA-directed RNA polymerase alpha subunit (EC 2.7.7.6)	Inner Membrane	13751000	15720000	1159900	15424000	8740800	27315000	6884900	5379500	8920000	0.000305882	0.000338972	2.40675e-05	0.00026575	0.000163632	0.000468242	0.000123217	9.74029e-05	0.00015064	1.3419	0.424273	0.600557	0.555013	-0.849407	0.425792
P08312	pheS	Phenylalanyl-tRNA synthetase alpha chain (EC 6.1.1.20)	Inner Membrane	4971300	5587600	3192900	7387800	7381200	7741300	4065000	4130600	6631000	0.000110583	0.000120486	6.62514e-05	0.000127289	0.00013818	0.000132704	7.27504e-05	7.47899e-05	0.000111983	1.3392	0.421373	0.177575	0.872874	-0.196154	0.582808
P0A9P6	deaD	DEAD-box ATP-dependent RNA helicase CshA (EC 3.6.4.13)	Inner Membrane	2374800	1769400		3032100	1789900	5644500		1043300	1888200	5.28258e-05	3.81538e-05		5.22419e-05	3.35078e-05	9.67597e-05		1.88903e-05	3.18877e-05	1.33736	0.419393	0.510553	0.558125	-0.841341	0.178588
P0A6T9	gcvH	Glycine cleavage system H protein	Cytoplasmic	13337000	16851000	20961000	20098000	30212000	31306000	18980000	22253000	26536000	0.000296673	0.00036336	0.000434933	0.000346281	0.000565584	0.000536657	0.000339681	0.00040292	0.000448137	1.32289	0.403695	0.229229	1.08747	0.120969	0.565742
P02931	ompF	Outer membrane protein F (Outer membrane protein 1A) (Outer membrane protein B) (Outer membrane protein IA) (Porin OmpF)	Outer Membrane	509250000	723080000	638050000	1031000000	915460000	1043600000	1292800000	914850000	946360000	0.0113279	0.0155919	0.0132393	0.0177637	0.0171379	0.0178897	0.0231369	0.0165646	0.015982	1.31455	0.394574	0.0713823	1.38657	0.471524	0.139114
P0AA97	yaeQ	Uncharacterized protein YaeQ	Cytoplasmic	1315700	735010	1278400		1944900	1533000	1808100	1792500	1667400	2.92669e-05	1.58491e-05	2.65263e-05		3.64095e-05	2.62791e-05	3.23591e-05	3.24556e-05	2.81588e-05	1.31253	0.392355	0.358888	1.29775	0.376009	0.218146
P02930	tolC	Type I secretion outer membrane protein, TolC precursor	Outer Membrane	5212400	5738800	2903600	7083600	5926700	9300600	6051300	5623800	5830600	0.000115946	0.000123747	6.02486e-05	0.000122048	0.000110951	0.000159434	0.000108299	0.000101826	9.84664e-05	1.30836	0.387762	0.287254	1.02884	0.0410169	0.899115
P05793	ilvC	Ketol-acid reductoisomerase (EC 1.1.1.86)	Inner Membrane	314190	586910	487760		884790	538750	670400	787320	853140	6.98895e-06	1.26556e-05	1.01208e-05		1.65637e-05	9.23541e-06	1.1998e-05	1.42555e-05	1.44077e-05	1.30012	0.378648	0.561777	1.36606	0.450016	0.14359
P0A7L3	rplT	LSU ribosomal protein L20p	Cytoplasmic	23057000	30129000	6123600	30270000	18399000	47289000	24714000	20825000	21847000	0.000512888	0.000649676	0.000127062	0.000521541	0.000344438	0.000810642	0.000442301	0.000377064	0.000368949	1.30008	0.378604	0.567972	0.921441	-0.118036	0.849989
P0A7L0	rplA	LSU ribosomal protein L1p (L10Ae)	Cytoplasmic	39410000	48864000	11391000	49752000	29737000	80380000	36987000	35693000	36883000	0.000876649	0.00105366	0.000236359	0.000857208	0.000556691	0.0013779	0.000661948	0.000646269	0.000622875	1.28852	0.365715	0.578693	0.891272	-0.166062	0.781828
P0ADZ0	rplW	LSU ribosomal protein L23p (L23Ae)	Cytoplasmic	9516100	17788000	18834000	23188000	27178000	21061000	58666000	43879000	61602000	0.000211679	0.000383565	0.000390798	0.00039952	0.000508786	0.000361034	0.00104993	0.000794487	0.00104033	1.28731	0.364357	0.272325	2.92558	1.54872	0.00491911
P62399	rplE	LSU ribosomal protein L5p (L11e)	Cytoplasmic	57392000	64819000	93808000	107040000	92358000	138170000	99290000	100270000	83203000	0.00127665	0.0013977	0.00194648	0.00184426	0.00172899	0.00236855	0.00177697	0.00181552	0.00140512	1.28587	0.362748	0.197342	1.08154	0.113088	0.638627
P63883	amiC	N-acetylmuramoyl-L-alanine amidase (EC 3.5.1.28)	Periplasmic	2832800	4492500	6028400	7122500	6883500	6655800	8978000	6907200	9107500	6.30137e-05	9.68724e-05	0.000125087	0.000122718	0.000128863	0.000114096	0.000160677	0.000125064	0.000153806	1.2832	0.359741	0.269972	1.54242	0.625193	0.0836246
P0AGD7	ffh	Signal recognition particle, subunit Ffh SRP54 (TC 3.A.5.1.1)	Inner Membrane	351140	531130	317710		577510	654670	422170	538280	755330	7.81087e-06	1.14528e-05	6.59236e-06		1.08113e-05	1.12225e-05	7.55548e-06	9.74627e-06	1.27559e-05	1.27826	0.35418	0.240706	1.1625	0.21723	0.541104
P0AEQ3	glnH	Glutamine-binding periplasmic protein (GlnBP)	Periplasmic	263570000	361790000	322080000	510330000	459800000	497800000	416480000	417190000	535590000	0.00586294	0.00780133	0.00668303	0.00879279	0.00860768	0.00853344	0.00745365	0.00755377	0.00904497	1.27456	0.350003	0.0775808	1.18209	0.241343	0.180843
P09372	grpE	Heat shock protein GrpE	Inner Membrane	11473000	10189000	4495900	12145000	13927000	14562000	5858700	10718000	10998000	0.000255209	0.000219707	9.32882e-05	0.000209254	0.00026072	0.000249626	0.000104852	0.000194063	0.000185733	1.26645	0.340786	0.415807	0.852947	-0.229472	0.655391
Q47702	yfeK	Uncharacterized protein YfeK	Periplasmic	776880	889220	1177800	1966300	1356400	1018100			2890300	1.72812e-05	1.91744e-05	2.44389e-05	3.38786e-05	2.53925e-05	1.74526e-05			4.8811e-05	1.25995	0.333361	0.390486
P0A908	mipA	MltA-interacting protein MipA	Outer Membrane	2107200	2457800	1307500	3755600	1878700	3456500	2711200	2190300	3323500	4.68733e-05	5.29979e-05	2.71301e-05	6.47076e-05	3.51702e-05	5.92524e-05	4.85217e-05	3.96583e-05	5.61268e-05	1.25298	0.325364	0.422534	1.13626	0.184297	0.568951
P37902	gltI	Glutamate/aspartate import solute-binding protein	Periplasmic	86937000	108180000	96991000	171520000	134000000	139600000	131450000	135160000	155400000	0.00193386	0.0023327	0.00201253	0.00295522	0.00250855	0.00239306	0.00235253	0.00244725	0.00262437	1.25127	0.323395	0.0734803	1.18236	0.241673	0.068511
P60340	truB	tRNA pseudouridine synthase B (EC 4.2.1.70)	Cytoplasmic	351980	520240	366640	781170	483860	628480	454760			7.82956e-06	1.1218e-05	7.60764e-06	1.34593e-05	9.0581e-06	1.07736e-05	8.13873e-06			1.24895	0.320713	0.27156
P0AFG6	sucB	Dihydrolipoamide succinyltransferase component (E2) of 2-oxoglutarate dehydrogenase complex (EC 2.3.1.61)	Inner Membrane	19412000	15356000	1974500	19457000	9984400	28000000	7558300	5461200	14214000	0.000431807	0.000331124	4.09701e-05	0.000335237	0.000186913	0.000479984	0.000135269	9.88822e-05	0.000240044	1.24659	0.317986	0.673443	0.589868	-0.761535	0.45383
P60422	rplB	LSU ribosomal protein L2p (L8e)	Cytoplasmic	18058000	30775000	2761000	24115000	9140900	47102000	13699000	14722000	16159000	0.000401688	0.000663606	5.72897e-05	0.000415492	0.000171122	0.000807437	0.000245168	0.000266561	0.000272891	1.24182	0.312461	0.740938	0.698941	-0.516756	0.586948
P76170	ynfB	UPF0482 protein YnfB	Outer Membrane	6160500	5547200	7142200	12532000	11720000	3912100	4433800	5625900	11018000	0.000137036	0.000119615	0.000148198	0.000215922	0.000219404	6.70624e-05	7.93507e-05	0.000101864	0.000186071	1.24093	0.311418	0.585337	0.907216	-0.140482	0.740947
P0A7W7	rpsH	SSU ribosomal protein S8p (S15Ae)	Cytoplasmic	34159000	34446000	9773200	35291000	28078000	56395000	34063000	30289000	32823000	0.000759844	0.000742764	0.00020279	0.000608051	0.000525634	0.00096674	0.000609618	0.000548422	0.000554311	1.23163	0.300572	0.596352	1.00408	0.00586931	0.991069
P0AD49	raiA	Ribosome hibernation protein YfiA	Inner Membrane	7634500	5485200	7384700	8389600	8693000	13758000	6397600	10920000	23468000	0.000169824	0.000118278	0.00015323	0.00014455	0.000162737	0.000235844	0.000114496	0.000197721	0.000396325	1.23066	0.299435	0.361684	1.60546	0.682988	0.398647
P15078	cstA	Carbon starvation protein A	Inner Membrane	695410	666680		981840		1149200				1.54689e-05	1.43757e-05		1.69167e-05		1.96999e-05				1.22691	0.295028	0.215862
P0AG30	rho	Transcription termination factor Rho	Inner Membrane	5998000	7301600	2446700	7093300	5084800	11731000	5809600	4819900	6109800	0.000133422	0.000157445	5.07681e-05	0.000122215	9.519e-05	0.000201096	0.000103973	8.72706e-05	0.000103182	1.225	0.292776	0.601982	0.861812	-0.214555	0.676153
P40120	mdoD	Glucans biosynthesis protein D precursor	Periplasmic	9271800	10595000	10696000	16780000	14139000	14325000	20775000	20066000	20752000	0.000206245	0.000228461	0.000221938	0.000289113	0.000264689	0.000245563	0.000371805	0.000363321	0.000350457	1.21735	0.283743	0.0438289	1.65323	0.725287	9.62982e-05
P36649	cueO	Blue copper oxidase CueO precursor	Periplasmic	1045900	858790	732330	1364000	1152400	1402300	1762100	1250900	1833100	2.32653e-05	1.85182e-05	1.51956e-05	2.35012e-05	2.15735e-05	2.40386e-05	3.15359e-05	2.26492e-05	3.09572e-05	1.21296	0.278531	0.220384	1.49427	0.579442	0.0668676
P0ADA3	nlpD	Murein hydrolase activator NlpD	Outer Membrane	7894100	10334000	7844900	15168000	8129300	15482000	9682500	10524000	8597500	0.000175599	0.000222833	0.000162779	0.000261339	0.000152185	0.000265397	0.000173285	0.000190551	0.000145193	1.20974	0.274699	0.414323	0.90702	-0.140793	0.487311
P0A6R3	fis	DNA-binding protein Fis	Cytoplasmic	1037300	2014600		2673500		1983000				2.3074e-05	4.34411e-05		4.60634e-05		3.39932e-05				1.20358	0.267337	0.636363
P76108	ydcS	ABC transporter, periplasmic spermidine putrescine-binding protein PotD (TC 3.A.1.11.1)	Periplasmic	1087700	1540600	1332400	2447100	1719700	1564000	1793200	1267000	2123300	2.41952e-05	3.32202e-05	2.76468e-05	4.21626e-05	3.21936e-05	2.68106e-05	3.20925e-05	2.29407e-05	3.5858e-05	1.18933	0.250147	0.373785	1.06853	0.0956239	0.70014
P0A8A8	rimP	COG0779: clustered with transcription termination protein NusA	Inner Membrane	970130	836590	857280	1380700	1261000	1207200	1677000	2597700	1272100	2.15799e-05	1.80395e-05	1.77882e-05	2.37889e-05	2.36065e-05	2.06942e-05	3.00129e-05	4.70348e-05	2.14831e-05	1.18607	0.246194	0.0902184	1.71633	0.779331	0.207049
P0A6X3	hfq	RNA-binding protein Hfq	Inner Membrane	2885000	3171500	1054400	3850400	2768400	3618700	1621200	1150700		6.41749e-05	6.83875e-05	2.18784e-05	6.63409e-05	5.18258e-05	6.20328e-05	2.90142e-05	2.08349e-05		1.16679	0.222542	0.627355	0.484158	-1.04645	0.210822
P45578	luxS	S-ribosylhomocysteine lyase (EC 4.4.1.21)	Inner Membrane	10344000	7822400	14127000	12138000	17773000	15201000	12938000	14762000	14373000	0.000230095	0.000168675	0.00029313	0.000209133	0.000332719	0.00026058	0.000231548	0.000267285	0.000242729	1.15975	0.213815	0.508042	1.07178	0.100005	0.695956
P29744	flgL	Flagellar hook-associated protein FlgL	Outer Membrane	4451900	4152600	4187900	7182200	4352400	6556000	8179100	6229200	6659300	9.90295e-05	8.95431e-05	8.68973e-05	0.000123747	8.14791e-05	0.000112385	0.000146379	0.000112788	0.000112461	1.15298	0.205364	0.383335	1.34907	0.431967	0.0924784
P0A7U3	rpsS	SSU ribosomal protein S19p (S15e)	Cytoplasmic	4610800	6686100	2837700	7215000		6384100				0.000102564	0.000144173	5.88812e-05	0.000124312		0.000109438				1.14726	0.198196	0.611029	OFF	OFF
P05055	pnp	Polyribonucleotide nucleotidyltransferase (EC 2.7.7.8)	Inner Membrane	21225000	25524000	7690100	28775000	18498000	29299000	722950	10042000	21349000	0.000472136	0.000550377	0.000159567	0.000495782	0.000346292	0.000502252	1.29385e-05	0.000181824	0.000360539	1.13725	0.185556	0.707755	0.469766	-1.08999	0.253367
P0A8V2	rpoB	DNA-directed RNA polymerase beta subunit (EC 2.7.7.6)	Inner Membrane	30615000	40352000	5842700	36972000	22798000	48544000	21003000	9952500	22625000	0.00068101	0.000870116	0.000121234	0.000637014	0.00042679	0.000832156	0.000375886	0.000180203	0.000382088	1.1337	0.181043	0.787839	0.56099	-0.833953	0.391985
P63284	clpB	ClpB protein	Inner Membrane	40691000	37721000	62026000	57711000	73111000	59120000	38331000	106910000	77183000	0.000905144	0.000813383	0.00128702	0.000994339	0.00136867	0.00101345	0.000686001	0.00193575	0.00130346	1.12341	0.167888	0.550375	1.30599	0.385142	0.495327
P00490	malP	Maltodextrin phosphorylase (EC 2.4.1.1)	Inner Membrane	6458100	8593200	4793700	9055900	8255400	9954800		7919400	11515000	0.000143656	0.000185296	9.94674e-05	0.00015603	0.000154545	0.000170648		0.000143391	0.000194464	1.12325	0.16768	0.553683	1.18291	0.242341	0.523205
P0A7S3	rpsL	SSU ribosomal protein S12p (S23e)	Cytoplasmic	24208000	41167000	31092000	34810000	37296000	59551000	64761000	50296000	50704000	0.000538491	0.00088769	0.000645147	0.000599763	0.0006982	0.00102084	0.00115901	0.000910675	0.000856283	1.11948	0.162825	0.642147	1.41261	0.49836	0.110728
P24178	yffB	Protein YffB	Cytoplasmic	1916100	1964700	1786900		2365600	2710100	2289200	2299400	3017200	4.26224e-05	4.23651e-05	3.70775e-05		4.42852e-05	4.64573e-05	4.09693e-05	4.16337e-05	5.09541e-05	1.11509	0.157165	0.114759	1.09415	0.129807	0.372944
P02359	rpsG	SSU ribosomal protein S7p (S5e)	Cytoplasmic	44753000	59974000	20723000	35757000	40273000	96877000	59042000	72122000	98494000	0.000995501	0.00129323	0.000429994	0.00061608	0.000753931	0.00166069	0.00105666	0.00130586	0.00166335	1.11475	0.156724	0.814815	1.4808	0.566375	0.238658
P0AG44	rplQ	LSU ribosomal protein L17p	Cytoplasmic	41611000	62813000	13077000	53734000	30913000	78060000	50980000	47188000	42169000	0.000925609	0.00135445	0.000271343	0.000925816	0.000578707	0.00133813	0.000912377	0.000854401	0.000712145	1.11415	0.15595	0.814208	0.971594	-0.0415742	0.946366
P0A6Q6	fabZ	3-hydroxyacyl-[acyl-carrier-protein] dehydratase, FabZ form (EC 4.2.1.59)	Inner Membrane	3252700	5480000	1087600	4883700	2176800	6519200	2631400	2076800	1324400	7.23541e-05	0.000118166	2.25673e-05	8.41443e-05	4.07508e-05	0.000111754	4.70936e-05	3.76032e-05	2.23663e-05	1.11057	0.151304	0.831839	0.502437	-0.992985	0.328103
P17846	cysI	Sulfite reductase [NADPH] hemoprotein beta-component (EC 1.8.1.2)	Cytoplasmic	601800	746220		831210	759660	1199200				1.33866e-05	1.60908e-05		1.43214e-05	1.42212e-05	2.0557e-05				1.11045	0.151138	0.560777
P77162	ykfB	Uncharacterized protein YkfB	Periplasmic	6822100	9338900	7304200	9687800	6959100	15248000		5981000		0.000151753	0.000201376	0.000151559	0.000166917	0.000130278	0.000261386		0.000108294		1.10678	0.146373	0.703449
P23847	dppA	Dipeptide-binding ABC transporter, periplasmic substrate-binding component (TC 3.A.1.5.2)	Periplasmic	318130000	341430000	232190000	475170000	317220000	413480000	357960000	287050000	418980000	0.00707659	0.0073623	0.00481785	0.008187	0.00593852	0.007088	0.00640633	0.00519742	0.00707568	1.10161	0.13962	0.563832	0.97002	-0.0439138	0.854294
P0A7K2	rplL	LSU ribosomal protein L7/L12 (P1/P2)	Cytoplasmic	58868000	65083000	76121000	85421000	45899000	138040000	112630000	87957000	89306000	0.00130948	0.00140339	0.00157948	0.00147177	0.000859252	0.00236632	0.00201571	0.00159258	0.00150819	1.09435	0.130077	0.788549	1.192	0.253382	0.217507
P0ACB2	hemB	Porphobilinogen synthase (EC 4.2.1.24)	Cytoplasmic	375950	1002100	734190	587340	1225400	951260		1041200	754590	8.36276e-06	2.16084e-05	1.52342e-05	1.01196e-05	2.29401e-05	1.63068e-05		1.88523e-05	1.27434e-05	1.09205	0.12704	0.80728	1.04841	0.0681983	0.891113
P0ADY7	rplP	LSU ribosomal protein L16p (L10e)	Cytoplasmic	24985000	25838000	6041300	28076000	14131000	34519000	15287000	19086000	13305000	0.000555775	0.000557148	0.000125355	0.000483739	0.000264539	0.000591735	0.000273588	0.000345577	0.000224693	1.08216	0.113912	0.855422	0.681477	-0.553262	0.459189
P25894	loiP	Metalloprotease LoiP (EC 3.4.24.-)	Outer Membrane	3587700	2588800	3377000	4165600	2930100	5567400	4978900	3164500	2648700	7.9806e-05	5.58226e-05	7.00714e-05	7.17717e-05	5.48529e-05	9.5438e-05	8.91062e-05	5.72974e-05	4.47309e-05	1.07955	0.110425	0.714817	0.92919	-0.105954	0.766167
P61175	rplV	LSU ribosomal protein L22p (L17e)	Cytoplasmic	39394000	45568000	17155000	59620000	39115000	36552000	30631000	28839000	14831000	0.000876293	0.000982589	0.00035596	0.00102723	0.000732252	0.000626585	0.000548196	0.000522168	0.000250464	1.07731	0.107431	0.816746	0.596353	-0.745761	0.263601
P02358	rpsF	SSU ribosomal protein S6p	Cytoplasmic	41119000	42749000	16951000	59411000	22247000	53407000	31010000	32444000	34552000	0.000914665	0.000921802	0.000351727	0.00102363	0.000416475	0.000915519	0.000554979	0.000587441	0.00058351	1.07651	0.106368	0.843931	0.788746	-0.342367	0.500372
P42596	rlmG	Ribosomal RNA large subunit methyltransferase G (EC 2.1.1.174) (23S rRNA m2G1835 methyltransferase) (rRNA (guanine-N(2)-)-methyltransferase RlmG)	Cytoplasmic		347270	417660		492190	470500	578990	609410	667090		7.48823e-06	8.66628e-06		9.21404e-06	8.06545e-06	1.0362e-05	1.10342e-05	1.12657e-05	1.06964	0.0971236	0.564762	1.3479	0.430711	0.0859042
P0ADT5	ygiC	Similarity with glutathionylspermidine synthase (EC 6.3.1.8), group 1	Cytoplasmic	662390	894190	753090	708070	803700	1495700	733200	966820	1354800	1.47344e-05	1.92815e-05	1.56263e-05	1.21998e-05	1.50457e-05	2.56397e-05	1.31219e-05	1.75055e-05	2.28797e-05	1.06533	0.0912938	0.8218	1.07785	0.108162	0.710366
P0ACE7	hinT	Purine nucleoside phosphoramidase (EC 3.9.1.-) (Histidine triad nucleotide binding protein HinT) (HIT protein)	Inner Membrane	10588000	8003500	8246500	8828800	11996000	13936000	18868000	11617000	14749000	0.000235523	0.000172581	0.000171112	0.000152117	0.000224571	0.000238895	0.000337676	0.000210341	0.000249079	1.06279	0.0878539	0.742052	1.37617	0.460655	0.187285
P00944	xylA	Xylose isomerase (EC 5.3.1.5)	Cytoplasmic	336760	327960	388120		420330	473210	367370	329980		7.491e-06	7.07185e-06	8.05334e-06		7.86879e-06	8.11191e-06	6.57474e-06	5.97472e-06		1.05991	0.0839368	0.252634	0.832332	-0.264768	0.0674003
P37095	pepB	Peptidase B (EC 3.4.11.23)	Cytoplasmic	10323000	10861000	6698500	12012000	11319000	12606000	5948000	7407700	9873100	0.000229628	0.000234197	0.000138991	0.000206962	0.000211897	0.000216096	0.00010645	0.000134126	0.000166736	1.05331	0.0749356	0.763031	0.675681	-0.565586	0.159895
P0A8T7	rpoC	DNA-directed RNA polymerase beta' subunit (EC 2.7.7.6)	Inner Membrane	27299000	35643000	4428200	29497000	17450000	41395000	13614000	10421000	17615000	0.000607248	0.000768575	9.18834e-05	0.000508222	0.000326673	0.000709605	0.000243647	0.000188686	0.00029748	1.05232	0.0735768	0.918974	0.497247	-1.00797	0.35101
P33219	yebF	Protein YebF	Extra-cellular	655920	692230	819490	785020	755850	1238300	2115600		1575500	1.45905e-05	1.49266e-05	1.70041e-05	1.35256e-05	1.41499e-05	2.12273e-05	3.78624e-05		2.66068e-05	1.05119	0.072027	0.783501	2.0787	1.05568	0.201271
P00864	ppc	Phosphoenolpyruvate carboxylase (EC 4.1.1.31)	Inner Membrane	8601200	8881400	3793500	8390700	9479400	9394000		4938900	8154400	0.000191328	0.000191511	7.87136e-05	0.000144569	0.000177459	0.000161035		8.94253e-05	0.00013771	1.0466	0.065715	0.868537	0.738169	-0.437978	0.433976
P0A9X9	cspA	Cold shock protein CspA	Cytoplasmic	28843000	20016000	36318000	28246000	45599000	32711000	51099000	44376000	49213000	0.000641593	0.000431608	0.000753584	0.000486668	0.000853636	0.000560742	0.000914507	0.000803486	0.000831103	1.04065	0.0574859	0.874237	1.3954	0.480678	0.112902
P0A7R9	rpsK	SSU ribosomal protein S11p (S14e)	Cytoplasmic	21977000	25371000	16435000	26436000	24050000	30552000	23149000	23034000	16462000	0.000488864	0.000547078	0.00034102	0.000455482	0.000450228	0.000523732	0.000414292	0.000417061	0.000278008	1.03811	0.0539632	0.80996	0.805659	-0.311759	0.313696
P00805	ansB	L-asparaginase (EC 3.5.1.1)	Periplasmic	24149000	34724000	82297000	61298000	59099000	54830000	114280000	149250000	106840000	0.000537178	0.000748758	0.00170763	0.00105614	0.00110636	0.000939912	0.00204524	0.00270237	0.0018043	1.03636	0.0515265	0.929295	2.18866	1.13005	0.062371
[truncated: 1,125 more rows]

## Sheet: Table 1C
Additional Table S1C - The E.coli CyDisCo membrane fraction
[truncated: 1,740 more rows]

[truncated: 1 more sheets: Description]
