# Supplementary material for: Comparative proteome analysis in an Escherichia coli CyDisCo strain identifies stress responses related to protein production, oxidative stress and accumulation of misfolded protein
Source: Microb Cell Fact. 2019 Jan 29;18:19. doi: 10.1186/s12934-019-1071-7 (PMC6350376; doi:10.1186/s12934-019-1071-7)
Supplement: Supplementary file 2 — Additional file 2: Table S2. Voronoi Treemap of log2 fold changes in protein abundance (E. coli CyDisCo vs. scFv and E. coli CyDisCo vs. mf_scFv). [file 12934_2019_1071_MOESM2_ESM.xlsx]

## Sheet: Table 2
Additional Table S2 - Voronoi Treemap of log2 fold changes in protein abundance (E. coli CyDisCo vs. scFv and E. coli CyDisCo vs. misfolded scFv)
Values based on 3 biological replicates
				scFv/control		mscFv/control
UniProt ID	Gene	Protein name	Sample fraction	log2 FC	p value	log2 FC	p value	Category	Subcategory
P75938	flgF	Flagellar basal-body rod protein FlgF	Periplasmic	ON		ON		Cellular processes	Motility and chemotaxis
P0ACA1	yibF	Uncharacterized GST-like protein yibF	Cytoplasmic	ON				Stress response	Cell redox homeostasis
P0A9C0	glpA	Anaerobic glycerol-3-phosphate dehydrogenase subunit A (EC 1.1.5.3)	Insoluble/Membrane	ON		ON		Metabolism	Energy metabolism
P0AC81	gloA	Lactoylglutathione lyase (EC 4.4.1.5)	Cytoplasmic	ON				Stress response	Detoxification
P0ADU5	ygiW	Protein YgiW	Periplasmic	ON				Stress response	Oxidative stress
P0C054	ibpA	16 kDa heat shock protein A	Cytoplasmic	ON		ON		Protein fate	Protein folding
P33343	yehD	Uncharacterized fimbrial-like protein YehD	Periplasmic	ON				Cellular processes	Cellular processes
P0AEH3	elaA	ElaA protein	Cytoplasmic	ON				Cellular processes	Cell signaling
P07364	cheR	Chemotaxis protein methyltransferase CheR (EC 2.1.1.80)	Cytoplasmic	ON				Cellular processes	Motility and Chemotaxis
P32144	yihW	DeoR-type transcriptional regulator YihW	Cytoplasmic	ON				Genetic Information Processing	Transcription
P46118	hexR	HTH-type transcriptional regulator HexR (Hex regulon repressor)	Cytoplasmic	ON				Genetic Information Processing	Transcription
P0ACL0	glpR	Glycerol-3-phosphate regulon repressor	Cytoplasmic	ON				Genetic Information Processing	Transcription
P0ACS5	zntR	Transcriptional regulator, MerR family	Cytoplasmic	ON				Genetic Information Processing	Transcription
P0A873	trmD	tRNA (Guanine37-N1) -methyltransferase (EC 2.1.1.31)	Cytoplasmic	ON				Genetic Information Processing	Translation
P0A821	selA	L-seryl-tRNA(Sec) selenium transferase (EC 2.9.1.1)	Cytoplasmic	ON				Genetic Information Processing	Translation
P25519	hflX	GTP-binding protein HflX	Insoluble/Membrane	ON				Genetic Information Processing	Translation
P0ACB0	dnaB	Replicative DNA helicase (EC 3.6.1.-)	Cytoplasmic	ON				Genetic Information Processing	Transcription
P0A6D3	aroA	5-Enolpyruvylshikimate-3-phosphate synthase (EC 2.5.1.19)	Cytoplasmic	ON				Metabolism	Amino acid and protein metabolism
P0A951	speG	Spermidine N1-acetyltransferase (EC 2.3.1.57)	Cytoplasmic	ON				Metabolism	Amino acid and protein metabolism
P0ADF8	ilvN	Acetolactate synthase small subunit (EC 2.2.1.6)	Cytoplasmic	ON				Metabolism	Amino acid and protein metabolism
P04982	rbsD	Ribose ABC transport system, high affinity permease RbsD (TC 3.A.1.2.1)	Cytoplasmic	ON				Metabolism	Carbohydrate Metabolism
Q46857	dkgA	2,5-diketo-D-gluconate reductase A (EC 1.1.1.274)	Cytoplasmic	ON				Metabolism	Carbohydrate Metabolism
P23331	tdk	Thymidine kinase (EC 2.7.1.21)	Cytoplasmic	ON				Metabolism	Nucleotide Metabolism
P13033	glpB	Anaerobic glycerol-3-phosphate dehydrogenase subunit B (EC 1.1.5.3)	Insoluble/Membrane	ON				Metabolism	Energy Metabolism
P0AEA8	cysG	Siroheme synthase [Includes: Uroporphyrinogen-III C-methyltransferase (Urogen III methylase) (EC 2.1.1.107) (SUMT) (Uroporphyrinogen III methylase) (UROM); Precorrin-2 dehydrogenase (EC 1.3.1.76); Sirohydrochlorin ferrochelatase (EC 4.99.1.4)]	Cytoplasmic	ON				Metabolism	Other Pathways
P25534	ubiH	2-octaprenyl-6-methoxyphenol hydroxylase (EC 1.14.13.-)	Insoluble/Membrane	ON				Metabolism	Other Pathways
P11454	entF	Enterobactin synthetase component F, serine activating enzyme (EC 2.7.7.-)	Insoluble/Membrane	ON				Metabolism	Other Pathways
P39286	rsgA	Ribosome small subunit-stimulated GTPase EngC	Insoluble/Membrane	ON				Metabolism	Other Pathways
P0AF43	yjbB	Sodium-dependent phosphate transporter	Insoluble/Membrane	ON				Metabolism	Other Pathways
P0ABQ0	coaBC	Phosphopantothenoylcysteine synthetase (EC 6.3.2.5)	Cytoplasmic	ON				Metabolism	Other Pathways
P25552	gppA	Exopolyphosphatase (EC 3.6.1.11)	Cytoplasmic	ON				Metabolism	Other Pathways
P0A8W5	yqgE	UPF0301 protein YqgE	Cytoplasmic	ON				Uncategorized	Uncategorized
P24202	mrr	Mrr restriction system protein (EcoKMrr)	Cytoplasmic	ON				Uncategorized	Uncategorized
P30864	yafC	Uncharacterized HTH-type transcriptional regulator YafC	Cytoplasmic	ON				Uncategorized	Uncategorized
P37342	yjjI	Uncharacterized protein YjjI	Cytoplasmic	ON				Uncategorized	Uncategorized
P64540	yfcL	Uncharacterized protein YfcL	Cytoplasmic	ON				Uncategorized	Uncategorized
P43672	uup	ABC transporter ATP-binding protein uup	Insoluble/Membrane	ON				Transport and binding proteins	Membrane transport
P0A9U3	ybiT	Uncharacterized ABC transporter ATP-binding protein YbiT	Insoluble/Membrane	ON				Transport and binding proteins	Membrane transport
P04816	livK	High-affinity leucine-specific transport system, periplasmic binding protein LivK (TC 3.A.1.4.1)	Periplasmic	ON				Transport and binding proteins	Membrane transport
P60778	tsgA	TsgA protein homolog	Insoluble/Membrane	ON				Transport and binding proteins	Membrane transport
P0AE16	ampG	AmpG permease	Insoluble/Membrane	OFF		OFF		Cell envelope	Cell wall components
P77257	lsrA	Autoinducer 2 (AI-2) ABC transport system, fused AI2 transporter subunits and ATP-binding component	Insoluble/Membrane	OFF		OFF		Cellular processes	Cell signaling
P75797	gsiB	Glutathione-binding protein GsiB	Periplasmic	OFF		OFF		Transport and binding proteins	Membrane transport
P37902	gltI	Glutamate/aspartate import solute-binding protein	Periplasmic	OFF		OFF		Transport and binding proteins	Membrane transport
P23256	malY	Maltose regulon modulator	Cytoplasmic	OFF		OFF		Transport and binding proteins	Membrane transport
P45955	cpoB	TPR repeat containing exported protein	Periplasmic	OFF		OFF		Transport and binding proteins	Membrane transport
P0AFU2	yfbS	Uncharacterized transporter YfbS	Insoluble/Membrane	OFF		OFF		Transport and binding proteins	Membrane transport
P0A901	blc	Outer membrane lipoprotein Blc	Insoluble/Membrane	OFF		OFF		Transport and binding proteins	Membrane transport
P30859	artI	Arginine ABC transporter, periplasmic arginine-binding protein ArtI	Periplasmic	OFF		OFF		Transport and binding proteins	Membrane transport
P31133	potF	Putrescine ABC transporter putrescine-binding protein PotF (TC 3.A.1.11.2)	Periplasmic	OFF		OFF		Transport and binding proteins	Membrane transport
P77348	mppA	Periplasmic Murein Peptide-Binding Protein MppA	Periplasmic	OFF		-3.04306	0.0451301	Transport and binding proteins	Membrane transport
P0AA47	plaP	Putrescine importer	Insoluble/Membrane	OFF		OFF		Metabolism	Amino acid and protein metabolism
P0AEC8	dcuS	Sensor histidine kinase DcuS (EC 2.7.13.3) (Fumarate sensor)	Insoluble/Membrane	OFF		OFF		Metabolism	Energy metabolism
P27431	roxA	50S ribosomal protein L16 3-hydroxylase (EC 1.14.11.47) (Ribosomal oxygenase RoxA) (ROX)	Cytoplasmic	OFF		OFF		Metabolism	Energy metabolism
P37685	aldB	Aldehyde dehydrogenase B (EC 1.2.1.22)	Cytoplasmic	OFF		OFF		Metabolism	Lipid metabolism
P0A8V6	fadR	Fatty acid metabolism regulator protein	Cytoplasmic	OFF		1.01602	0.0966418	Metabolism	Lipid metabolism
P65367	yqcA	Hypothetical flavoprotein YqcA (clustered with tRNA pseudouridine synthase C)	Cytoplasmic	OFF		OFF		Metabolism	Other pathways
P06610	btuE	Glutathione peroxidase (EC 1.11.1.9)	Cytoplasmic	OFF		OFF		Stress response	Cell redox homeostasis
P76569	yfgD	Uncharacterized protein YfgD	Cytoplasmic	OFF		OFF		Stress response	Oxidative stress
P75870	yccS	Inner membrane protein YccS	Insoluble/Membrane	OFF		0.18851	0.232028	Uncategorized	Uncategorized
P0A978	cspG	Cold shock protein CspG	Cytoplasmic	3.85422	0.0282993	3.12899	0.19761	Stress response	Cold shock
P0ADG4	suhB	Inositol-1-monophosphatase (I-1-Pase) (IMPase) (Inositol-1-phosphatase) (EC 3.1.3.25)	Insoluble/Membrane	3.27111	0.000531882	3.00582	0.349744	Metabolism	Carbohydrate metabolism
P22333	add	Adenosine deaminase (EC 3.5.4.4)	Insoluble/Membrane	3.04163	0.159993	2.35298	0.358124	Metabolism	Nucleotide metabolism
P00961	glyS	Glycine--tRNA ligase beta subunit (EC 6.1.1.14) (Glycyl-tRNA synthetase beta subunit) (GlyRS)	Insoluble/Membrane	3.02811	0.0126955	1.94918	0.464716	Metabolism	Amino acid and protein metabolism
P76658	hldE	ADP-heptose synthase (EC 2.7.-.-)	Cytoplasmic	2.90396	0.0596823	2.94098	0.233717	Cell envelope	Cell wall components
P0A9W3	ettA	Energy-dependent translational throttle protein EttA (Translational regulatory factor EttA)	Insoluble/Membrane	2.89299	0.068237	2.8492	0.403315	Genetic information processing	Translation
P0A7D4	purA	Adenylosuccinate synthetase (EC 6.3.4.4)	Insoluble/Membrane	2.80243	0.0495169	2.41151	0.22427	Metabolism	Nucleotide metabolism
P0A9M8	pta	Phosphate acetyltransferase (EC 2.3.1.8)	Periplasmic	2.79096	0.0571489	2.28621	0.381233	Metabolism	Energy metabolism
P09831	gltB	Glutamate synthase [NADPH] large chain (EC 1.4.1.13)	Insoluble/Membrane	2.64866	0.00193585	2.40529	0.548087	Metabolism	Other pathways
P0A6Z3	htpG	Chaperone protein HtpG	Insoluble/Membrane	2.55117	0.10006	2.88763	0.272322	Protein fate	Protein folding
P32176	fdoG	Formate dehydrogenase O alpha subunit (EC 1.2.1.2)	Periplasmic	2.52932	0.314521	2.25135	0.0260344	Metabolism	Energy metabolism
P00944	xylA	Xylose isomerase (EC 5.3.1.5)	Cytoplasmic	2.52247	0.268637			Metabolism	Carbohydrate Metabolism
P00960	glyQ	Glycine--tRNA ligase alpha subunit (EC 6.1.1.14) (Glycyl-tRNA synthetase alpha subunit) (GlyRS)	Insoluble/Membrane	2.38806	0.0173261	2.57188	0.190623	Metabolism	Amino acid and protein metabolism
P63284	clpB	ClpB protein	Insoluble/Membrane	2.38535	0.00723136	2.84079	0.00197566	Protein fate	Protein degradation
P77754	spy	Periplasmic chaperone Spy (Spheroplast protein Y)	Periplasmic	2.37142	0.00465016	2.25304	0.0410363	Protein fate	Protein folding
P00452	nrdA	Ribonucleotide reductase of class Ia (aerobic), alpha subunit (EC 1.17.4.1)	Insoluble/Membrane	2.3532	0.0895123	2.14149	0.418528	Metabolism	Nucleotide metabolism
P00582	polA	DNA polymerase I (EC 2.7.7.7)	Insoluble/Membrane	2.30825	0.0308018	1.83	0.436304	Genetic information processing	Transcription
P0A6P5	der	GTP-binding protein EngA	Insoluble/Membrane	2.26417	0.0643399	1.72195	0.427441	Genetic information processing	Translation
P15254	purL	Phosphoribosylformylglycinamidine synthase, synthetase subunit (EC 6.3.5.3)	Cytoplasmic	2.24108	0.0502561	OFF		Metabolism	Nucleotide metabolism
P00561	thrA	Aspartokinase (EC 2.7.2.4)	Insoluble/Membrane	2.23165	0.0926095	1.27329	0.489979	Metabolism	Amino acid and protein metabolism
P0A828	smg	Protein Smg	Cytoplasmic	2.20272	0.365141			Uncategorized	Uncategorized
P0A7B8	hslV	ATP-dependent protease HslV (EC 3.4.25.-)	Cytoplasmic	2.07751	0.0537514	1.35152	0.0149179	Protein fate	Protein degradation
P07330	cheB	Chemotaxis response regulator protein-glutamate methylesterase CheB (EC 3.1.1.61)	Cytoplasmic	2.07036	0.0777698	2.52156	0.309883	Cellular processes	Motility and chemotaxis
P0AEZ3	minD	Septum site-determining protein MinD	Insoluble/Membrane	1.97199	0.0343348	1.98296	0.278575	Cellular processes	Cellular processes
P14294	topB	DNA topoisomerase III (EC 5.99.1.2)	Cytoplasmic	1.9558	0.0931601	OFF		Genetic information processing	Transcription
P0AEN1	fre	NAD(P)H-flavin reductase (EC 1.5.1.29) (EC 1.16.1.3)	Cytoplasmic	1.93897	0.213504	1.7786	0.0690072	Metabolism	Other pathways
P09372	grpE	Heat shock protein GrpE	Insoluble/Membrane	1.92489	0.0289267	1.59529	0.076786	Protein fate	Protein folding
P0ADQ2	yiiD	Uncharacterized protein YiiD	Insoluble/Membrane	1.91162	0.094109			Metabolism	Other Pathways
P0AFM6	pspA	Phage shock protein A	Insoluble/Membrane	1.90522	0.0771403	2.15483	0.0984645	Stress response	Phage shock
P0AES6	gyrB	DNA gyrase subunit B (EC 5.99.1.3)	Insoluble/Membrane	1.88957	0.0455313	1.11202	0.472588	Cellular processes	Cellular processes
P0A9P6	deaD	DEAD-box ATP-dependent RNA helicase CshA (EC 3.6.4.13)	Insoluble/Membrane	1.84523	0.00106357	0.614309	0.321595	Stress response	Cold shock
P14900	murD	UDP-N-acetylmuramoylalanine--D-glutamate ligase (EC 6.3.2.9)	Cytoplasmic	1.83408	0.125722			Cell envelope	Cell wall components
P0A796	pfkA	6-phosphofructokinase (EC 2.7.1.11)	Insoluble/Membrane	1.83221	0.127557	2.65025	0.184636	Metabolism	Carbohydrate metabolism
P0ACI0	rob	Right origin-binding protein	Cytoplasmic	1.77287	0.133853	0.243572	0.665355	Genetic information processing	Transcription
P0AG30	rho	Transcription termination factor Rho	Insoluble/Membrane	1.7618	0.0185479	0.945725	0.525513	Genetic information processing	Transcription
P77433	ykgG	Predicted L-lactate dehydrogenase, hypothetical protein subunit YkgG	Cytoplasmic	1.75139	0.333519			Metabolism	Carbohydrate Metabolism
P0ACL2	exuR	Hexuronate utilization operon transcriptional repressor ExuR	Cytoplasmic	1.75003	0.45619	0.653963	0.733891	Metabolism	Carbohydrate metabolism
P42641	obgE	GTP-binding protein Obg	Insoluble/Membrane	1.73151	0.0385961	1.09638	0.134234	Genetic information processing	Translation
P60624	rplX	LSU ribosomal protein L24p (L26e)	Cytoplasmic	1.73095	0.113453	1.87698	0.0022809	Genetic information processing	Translation
P0A7E5	pyrG	CTP synthase (EC 6.3.4.2)	Insoluble/Membrane	1.72347	0.204257	1.35264	0.411813	Metabolism	Nucleotide metabolism
P35340	ahpF	Alkyl hydroperoxide reductase protein F (EC 1.6.4.-)	Insoluble/Membrane	1.71869	0.0485131	1.64986	0.333617	Metabolism	Other pathways
P10121	ftsY	Signal recognition particle receptor protein FtsY (=alpha subunit) (TC 3.A.5.1.1)	Insoluble/Membrane	1.71264	0.00540682	1.99646	0.0586075	Genetic information processing	Translation
P0AE78	corC	Magnesium and cobalt efflux protein CorC	Cytoplasmic	1.7094	0.111338	2.05022	0.277968	Transport and binding proteins	Membrane transport
P25535	ubiI	2-octaprenyl-3-methyl-6-methoxy-1,4-benzoquinol hydroxylase (EC 1.14.13.-)	Insoluble/Membrane	1.66679	0.0150811	0.772878	0.00320891	Metabolism	Other pathways
Q46851	gpr	L-glyceraldehyde 3-phosphate reductase (GAP reductase) (EC 1.1.1.-)	Cytoplasmic	1.64581	0.246434	OFF		Cellular processes	Cell signaling
P42616	yqjC	Protein YqjC	Periplasmic	1.63632	0.00240032	1.51286	0.00656293	Uncategorized	Uncategorized
P76014	dhaL	Phosphoenolpyruvate-dihydroxyacetone phosphotransferase (EC 2.7.1.121), ADP-binding subunit DhaL	Cytoplasmic	1.63365	0.363805	0.916758	0.564687	Metabolism	Carbohydrate metabolism
P0C058	ibpB	16 kDa heat shock protein B	Cytoplasmic	1.63132	0.0628338	1.05595	0.178309	Protein fate	Protein folding
P0AD59	ivy	Inhibitor of vertebrate lysozyme precursor	Periplasmic	1.62527	0.10006	1.54443	0.0907067	Protein fate	Protein folding
P24182	accC	Biotin carboxylase of acetyl-CoA carboxylase (EC 6.3.4.14)	Insoluble/Membrane	1.62427	0.00547946	2.09649	0.352402	Metabolism	Lipid metabolism
P37648	yhjJ	Protein YhjJ, putative peptidase	Periplasmic	1.62126	0.00222689	1.51864	0.000681101	Protein fate	Protein folding
P77536	ykgF	Predicted L-lactate dehydrogenase, Iron-sulfur cluster-binding subunit YkgF	Cytoplasmic	1.62063	0.393749	1.5648	0.0124073	Metabolism	Carbohydrate metabolism
P0A6H1	clpX	ATP-dependent Clp protease ATP-binding subunit ClpX	Cytoplasmic	1.61764	0.044276	1.34329	0.334124	Protein fate	Protein degradation
P0A9Q5	accD	Acetyl-coenzyme A carboxyl transferase beta chain (EC 6.4.1.2)	Insoluble/Membrane	1.57923	0.070005	1.0742	0.0771963	Metabolism	Lipid metabolism
P0A9D2	gstA	Glutathione S-transferase (EC 2.5.1.18)	Cytoplasmic	1.57367	0.280598	1.65536	0.186281	Stress response	Cell redox homeostasis
P0AGK4	yhbY	RNA-binding protein YhbY	Cytoplasmic	1.56804	0.303629	2.2341	0.0373081	Genetic information processing	Translation
P0AFR4	yciO	Hypothetical YciO protein, TsaC/YrdC paralog	Cytoplasmic	1.552	0.380252	0.968653	0.357047	Genetic information processing	Transcription
P0AEK4	fabI	Enoyl-[acyl-carrier-protein] reductase [NADH] (EC 1.3.1.9)	Insoluble/Membrane	1.53827	0.0663416	1.60607	0.305212	Metabolism	Lipid metabolism
P0AF18	nagA	N-acetylglucosamine-6-phosphate deacetylase (EC 3.5.1.25)	Cytoplasmic	1.53735	0.116767	OFF		Metabolism	Carbohydrate metabolism
P25745	mnmA	tRNA-specific 2-thiouridylase MnmA	Cytoplasmic	1.52031	0.180873			Metabolism	Other Pathways
P25718	malS	Periplasmic alpha-amylase (EC 3.2.1.1)	Periplasmic	1.50762	0.0678372	1.72718	0.0336411	Metabolism	Carbohydrate metabolism
P0A7P5	rpmH	LSU ribosomal protein L34p	Cytoplasmic	1.50093	0.124683	1.00834	0.405625	Genetic information processing	Translation
P75913	ghrA	Glyoxylate/hydroxypyruvate reductase A (EC 1.1.1.79) (EC 1.1.1.81) (2-ketoacid reductase)	Cytoplasmic	1.49219	0.569323			Metabolism	Carbohydrate Metabolism
P05706	srlB	PTS system, glucitol/sorbitol-specific IIA component	Insoluble/Membrane	1.48946	0.0101407	2.38193	0.0301798	Metabolism	Carbohydrate metabolism
P21338	rna	Ribonuclease I precursor (EC 3.1.27.6)	Periplasmic	1.48782	0.00146609	1.14247	0.00392068	Metabolism	Nucleotide metabolism
P07762	glgB	1,4-alpha-glucan (glycogen) branching enzyme, GH-13-type (EC 2.4.1.18)	Cytoplasmic	1.48317	0.285719	1.71771	0.184485	Metabolism	Carbohydrate metabolism
P0AA43	rsuA	Ribosomal small subunit pseudouridine synthase A (EC 4.2.1.70)	Cytoplasmic	1.47989	0.241051	2.11974	0.136299	Genetic information processing	Translation
P77395	ybbN	Uncharacterized protein YbbN	Cytoplasmic	1.47594	0.00488359	1.51777	0.327809	Protein fate	Protein folding
P0A8D0	nrdR	Ribonucleotide reductase transcriptional regulator NrdR	Cytoplasmic	1.46999	0.254047			Metabolism	Nucleotide Metabolism
P0A6H5	hslU	ATP-dependent hsl protease ATP-binding subunit HslU	Insoluble/Membrane	1.46067	0.0500997	1.22514	0.190509	Protein fate	Protein degradation
P66948	bepA	Beta-barrel assembly-enhancing protease (EC 3.4.-.-)	Periplasmic	1.45667	0.000478777	1.14377	0.00431931	Protein fate	Protein folding
P0AGE0	ssb	Single-stranded DNA-binding protein	Cytoplasmic	1.45648	0.0357708	0.268487	0.813548	Metabolism	Nucleotide metabolism
P0A8S1	argP	HTH-type transcriptional regulator ArgP (Inhibitor of chromosome initiation) (OriC replication inhibitor)	Cytoplasmic	1.45161	0.433407			Metabolism	Nucleotide Metabolism
P0AE01	trmJ	tRNA:Cm32/Um32 methyltransferase	Insoluble/Membrane	1.44584	0.00665082	1.87198	0.494791	Metabolism	Nucleotide metabolism
P0AFW2	rmf	Ribosome modulation factor (RMF) (Hibernation factor RMF) (Protein E)	Cytoplasmic	1.44172	0.268058	0.294407	0.567043	Genetic information processing	Transcription
P0AEU7	skp	Outer membrane protein H precursor	Periplasmic	1.43958	0.0365171	1.47782	0.0474849	Protein fate	Protein folding
P0ABD5	accA	Acetyl-coenzyme A carboxyl transferase alpha chain (EC 6.4.1.2)	Insoluble/Membrane	1.43947	0.032243	0.579811	0.351144	Metabolism	Lipid metabolism
P0AG86	secB	Protein-export protein SecB	Insoluble/Membrane	1.43265	0.0047312	1.13813	0.315361	Transport and binding proteins	Membrane transport
P0AEK2	fabG	3-oxoacyl-[acyl-carrier protein] reductase (EC 1.1.1.100)	Insoluble/Membrane	1.43167	0.00258985	1.64737	0.260807	Metabolism	Lipid metabolism
P00634	phoA	Alkaline phosphatase (EC 3.1.3.1)	Periplasmic	1.42846	0.0434236	0.658735	0.200653	Metabolism	Other pathways
P76223	ynjB	Protein YnjB	Periplasmic	1.42577	0.0303273	1.37345	0.00467488	Transport and binding proteins	Membrane transport
P23538	ppsA	Phosphoenolpyruvate synthase (EC 2.7.9.2)	Insoluble/Membrane	1.40611	0.0542945	1.25657	0.249204	Metabolism	Carbohydrate metabolism
P31828	pqqL	Probable zinc protease PqqL (EC 3.4.24.-)	Periplasmic	1.3985	0.212674	0.73445	0.123619	Genetic information processing	Translation
P37634	rlmJ	Protein involved in catabolism of external DNA	Cytoplasmic	1.39995	0.0238527	0.759861	0.0183633	Metabolism	Nucleotide metabolism
P0A6Y5	hslO	33 kDa chaperonin (Heat shock protein 33) (HSP33)	Insoluble/Membrane	1.37687	0.00896111	2.06121	0.360677	Protein fate	Protein degradation
P0A9A6	ftsZ	Cell division protein FtsZ (EC 3.4.24.-)	Insoluble/Membrane	1.37685	0.112845	0.809955	0.503182	Cellular processes	Cellular processes
P32160	yiiQ	Uncharacterized protein YiiQ	Periplasmic	1.36798	0.0315087	1.20063	0.043802	Uncategorized	Uncategorized
P32132	typA	GTP-binding protein TypA/BipA	Insoluble/Membrane	1.36747	0.112267	1.80483	0.404849	Stress response	Cold shock
Q47622	sapA	Peptide transport periplasmic protein SapA	Periplasmic	1.36377	0.000646099	1.34022	0.000621146	Transport and binding proteins	Membrane transport
P0ABZ6	surA	Survival protein SurA precursor (Peptidyl-prolyl cis-trans isomerase SurA) (EC 5.2.1.8)	Periplasmic	1.36268	0.0022779	1.24244	0.00040338	Protein fate	Protein folding
P05458	ptrA	Protease III precursor (EC 3.4.24.55)	Periplasmic	1.36143	0.0152866	0.88583	0.101746	Protein fate	Protein degradation
P25397	tehB	Tellurite resistance protein TehB	Cytoplasmic	1.36122	0.153002	-0.043901	0.958225	Stress response	Detoxification
P0A6F3	glpK	Glycerol kinase (EC 2.7.1.30)	Insoluble/Membrane	1.3603	0.126556	1.62345	0.313561	Metabolism	Lipid metabolism
P00811	ampC	Beta-lactamase (EC 3.5.2.6)	Periplasmic	1.35381	0.170463	0.55076	0.0662084	Cellular processes	Cellular processes
Q46802	ygeV	Uncharacterized sigma-54-dependent transcriptional regulator YgeV	Cytoplasmic	1.345	0.611273	OFF		Cellular processes	Cell signaling
P0A9X4	mreB	Rod shape-determining protein MreB	Insoluble/Membrane	1.3423	0.00264973	1.54307	0.193724	Cellular processes	Cellular processes
P75949	nagZ	Beta N-acetyl-glucosaminidase (EC 3.2.1.52)	Cytoplasmic	1.34134	0.633948	-1.07347	0.261067	Cell envelope	Cell wall components
P76116	yncE	Uncharacterized protein YncE	Periplasmic	1.33381	0.00292892	1.44634	0.00967605	Uncategorized	Uncategorized
P36979	rlmN	Dual-specificity RNA methyltransferase RlmN (EC 2.1.1.192) (23S rRNA (adenine(2503)-C(2))-methyltransferase) (23S rRNA m2A2503 methyltransferase) (Ribosomal RNA large subunit methyltransferase N) (tRNA (adenine(37)-C(2))-methyltransferase) (tRNA m2A37 methyltransferase)	Cytoplasmic	1.32714	0.217361	-0.376849	0.691477	Genetic information processing	Transcription
P60906	hisS	Histidyl-tRNA synthetase (EC 6.1.1.21)	Insoluble/Membrane	1.32666	0.150696	1.60474	0.394152	Metabolism	Other pathways
P39099	degQ	Outer membrane stress sensor protease DegQ, serine protease	Periplasmic	1.85008	0.00284393	3.10018	0.0477521	Protein fate	Protein degradation
P37329	modA	Molybdenum ABC transporter, periplasmic molybdenum-binding protein ModA (TC 3.A.1.8.1)	Periplasmic	1.32258	0.0207523	1.0455	0.0067506	Metabolism	Other pathways
P33363	bglX	Periplasmic beta-glucosidase (EC 3.2.1.21)	Periplasmic	1.31663	0.00694107	1.24211	0.0821012	Metabolism	Carbohydrate metabolism
P0A9E5	fnr	Fumarate and nitrate reduction regulatory protein	Cytoplasmic	1.3147	0.0421978	1.37035	0.317848	Metabolism	Energy metabolism
P0A9T4	tas	Protein tas	Cytoplasmic	1.29855	0.396208	OFF		Stress response	Oxidative stress
P0ADA1	tesA	Acyl-CoA thioesterase I (EC 3.1.2.-) (Lecithinase B) (Lysophospholipase L1) (EC 3.1.1.5) (Protease I)	Periplasmic	1.29405	0.00580194	1.17294	0.0214153	Metabolism	Lipid metabolism
P32099	lplA	Lipoate-protein ligase A	Cytoplasmic	1.28905	0.312898			Metabolism	Other Pathways
P0A9Q7	adhE	Alcohol dehydrogenase (EC 1.1.1.1)	Insoluble/Membrane	1.28846	0.10996	0.574569	0.0261749	Metabolism	Carbohydrate metabolism
P77529	ydjN	L-cystine uptake protein TcyP	Insoluble/Membrane	1.27608	0.0219687	0.368779	0.181807	Metabolism	Other pathways
P76002	pliG	Inhibitor of g-type lysozyme	Periplasmic	1.27506	0.0227863	0.743619	0.0383517	Cellular processes	Cellular processes
P0A817	metK	S-adenosylmethionine synthetase (EC 2.5.1.6)	Insoluble/Membrane	1.26959	0.0147233	1.41912	0.375618	Metabolism	Amino acid and protein metabolism
P11350	narI	Respiratory nitrate reductase gamma chain (EC 1.7.99.4)	Insoluble/Membrane	1.25718	0.0890897	0.704141	0.312038	Metabolism	Other pathways
P0AG80	ugpB	Glycerol-3-phosphate ABC transporter, periplasmic glycerol-3-phosphate-binding protein (TC 3.A.1.1.3)	Periplasmic	1.25481	0.0039212	0.85046	0.0215063	Metabolism	Carbohydrate metabolism
P75864	rlmL	Ribosomal RNA large subunit methyltransferase K/L [Includes: 23S rRNA m2G2445 methyltransferase (EC 2.1.1.173) (rRNA (guanine-N(2)-)-methyltransferase RlmL); 23S rRNA m7G2069 methyltransferase (EC 2.1.1.264) (rRNA (guanine-N(7)-)-methyltransferase RlmK)]	Cytoplasmic	1.25065	0.0625361	0.776246	0.238168	Genetic information processing	Translation
P0A705	infB	Translation initiation factor 2	Insoluble/Membrane	1.24769	0.067468	0.694004	0.540592	Genetic information processing	Translation
P0A717	prs	Ribose-phosphate pyrophosphokinase (EC 2.7.6.1)	Insoluble/Membrane	1.24543	0.0857455	1.0592	0.532097	Metabolism	Nucleotide metabolism
P30744	sdaB	L-serine dehydratase, alpha subunit (EC 4.3.1.17)	Cytoplasmic	1.24489	0.146932	1.08573	0.0399102	Metabolism	Carbohydrate metabolism
P0AGC3	slt	Soluble lytic murein transglycosylase precursor (EC 3.2.1.-)	Periplasmic	1.24276	3.70116e-05	0.777417	0.35078	Cell envelope	Cell wall components
P40120	mdoD	Glucans biosynthesis protein D precursor	Periplasmic	1.23597	0.365741	OFF		Metabolism	Carbohydrate metabolism
P0A8Y3	yihX	Alpha-D-glucose 1-phosphate phosphatase YihX (Alpha-D-glucose-1-P phosphatase) (EC 3.1.3.10) (Alpha-D-glucose-1-phosphatase) (Haloacid dehalogenase-like phosphatase 4) (HAD4)	Cytoplasmic	1.22658	0.112898	OFF		Metabolism	Carbohydrate metabolism
P10443	dnaE	DNA polymerase III alpha subunit (EC 2.7.7.7)	Cytoplasmic	1.22442	0.557559	OFF		Genetic information processing	Transcription
P0A9R7	ftsE	Cell division ATP-binding protein FtsE	Insoluble/Membrane	1.20983	0.00025538	1.04027	0.00187633	Cellular processes	Cellular processes
P0ADV7	mlaC	Uncharacterized ABC transporter, auxiliary component YrbC	Periplasmic	1.20663	0.0450131	1.00219	1.80331e-05	Cell envelope	Cell wall components
P33590	nikA	Nickel ABC transporter, periplasmic nickel-binding protein NikA (TC 3.A.1.5.3)	Periplasmic	1.20374	0.000857337	1.67398	0.0636401	Transport and binding proteins	Membrane transport
P0AC19	folX	Dihydroneopterin triphosphate epimerase	Cytoplasmic	1.18413	0.212511	OFF		Metabolism	Other pathways
P0AF52	ghxP	Guanine/hypoxanthine permease GhxP	Insoluble/Membrane	1.18297	0.110294			Transport and binding proteins	Membrane transport
P03004	dnaA	Chromosomal replication initiator protein DnaA	Cytoplasmic	1.1829	0.337787	-0.221113	0.836508	Genetic information processing	Transcription
P30014	rnt	Ribonuclease T (EC 3.1.13.-)	Cytoplasmic	1.18095	0.145241	OFF		Metabolism	Nucleotide metabolism
P23827	eco	Ecotin	Periplasmic	1.1792	0.0309182	0.815281	0.0922014	Metabolism	Amino acid and protein metabolism
P12295	ung	Uracil-DNA glycosylase, family 1	Cytoplasmic	1.17781	0.154282	0.577721	0.699406	Metabolism	Nucleotide metabolism
P0AFX4	rsd	Regulator of sigma D	Cytoplasmic	1.176	0.228626	-0.408529	0.709371	Genetic information processing	Transcription
P78067	ynjE	Thiosulfate sulfurtransferase YnjE (EC 2.8.1.1)	Periplasmic	1.17573	0.000316694	1.20432	0.00021402	Metabolism	Other pathways
P37387	xylF	Xylose ABC transporter, periplasmic xylose-binding protein XylF	Periplasmic	1.17373	0.0376144	0.495655	0.0481014	Transport and binding proteins	Membrane transport
P0CE48	tufB	Translation elongation factor Tu	Insoluble/Membrane	1.17047	0.0324041	1.45749	0.30876	Genetic information processing	Translation
P00579	rpoD	RNA polymerase sigma factor RpoD	Cytoplasmic	1.16805	0.079967	0.530512	0.278186	Genetic information processing	Transcription
P39377	iadA	Asp-X dipeptidase	Cytoplasmic	1.1651	0.344862	OFF		Metabolism	Amino acid and protein metabolism
P0AGG4	trxC	Thioredoxin-2 (Trx-2) (EC 1.8.1.8) (Protein-disulfide reductase)	Cytoplasmic	1.15736	0.347289	1.11025	0.126295	Stress response	Cell redox homeostasis
P0A8H8	yacG	DNA gyrase inhibitor YacG	Cytoplasmic	1.15687	0.319444	OFF		Genetic information processing	Transcription
P0AD96	livJ	Branched-chain amino acid ABC transporter, amino acid-binding protein (TC 3.A.1.4.1)	Periplasmic	1.15453	0.000980073	1.12485	0.00574543	Transport and binding proteins	Membrane transport
P31545	efeB	Ferrous iron transport peroxidase EfeB	Periplasmic	1.1545	0.00432472	0.895581	0.00246232	Stress response	Oxidative stress
P0AB24	efeO	Ferrous iron transport periplasmic protein EfeO, contains peptidase-M75 domain and (frequently) cupredoxin-like domain	Periplasmic	1.15415	0.00573329	1.06352	0.0139193	Stress response	Oxidative stress
P0AEW6	gsk	Inosine-guanosine kinase (EC 2.7.1.73)	Cytoplasmic	1.1523	0.385358			Metabolism	Nucleotide Metabolism
P0A894	rapZ	RNase adapter protein RapZ	Insoluble/Membrane	1.14104	0.0052711			Metabolism	Nucleotide Metabolism
P64506	yebY	Uncharacterized protein YebY	Periplasmic	1.13902	0.00924618	1.13519	0.00947529	Uncategorized	Uncategorized
P0A6F9	groES	Heat shock protein 60 family co-chaperone GroES	Insoluble/Membrane	1.13741	0.0828262	2.32579	0.0494017	Protein fate	Protein folding
P07024	ushA	5'-nucleotidase (EC 3.1.3.5)	Periplasmic	1.13701	0.0100404	0.946012	1.78422e-05	Metabolism	Nucleotide metabolism
P0A9K3	ybeZ	Phosphate starvation-inducible protein PhoH, predicted ATPase	Insoluble/Membrane	1.13619	0.0297067	0.240084	0.636569	Metabolism	Other pathways
P0AFX9	rseB	Sigma factor RpoE negative regulatory protein RseB precursor	Periplasmic	1.13245	0.00425998	1.02538	0.0109236	Genetic information processing	Transcription
P0A8R7	ycjF	Membrane protein YcjF	Insoluble/Membrane	1.12699	0.0236029	1.22457	0.0977652	Cellular processes	Cell signaling
P0AB89	purB	Adenylosuccinate lyase (EC 4.3.2.2)	Insoluble/Membrane	1.12531	0.23098	1.67604	0.456897	Metabolism	Nucleotide metabolism
P42596	rlmG	Ribosomal RNA large subunit methyltransferase G (EC 2.1.1.174) (23S rRNA m2G1835 methyltransferase) (rRNA (guanine-N(2)-)-methyltransferase RlmG)	Cytoplasmic	1.12033	0.00936173			Genetic Information Processing	Translation
P31057	panB	3-methyl-2-oxobutanoate hydroxymethyltransferase (EC 2.1.2.11)	Cytoplasmic	1.11918	0.225445	1.10934	0.0928706	Metabolism	Other pathways
P23845	cysN	Sulfate adenylyltransferase subunit 1 (EC 2.7.7.4)	Cytoplasmic	1.106	0.247299	-0.531986	0.29587	Metabolism	Other pathways
P39265	alsB	D-allose-binding periplasmic protein (ALBP)	Periplasmic	1.10551	0.0504179	1.12281	0.0420572	Transport and binding proteins	Membrane transport
P0A832	smpB	tmRNA-binding protein SmpB	Cytoplasmic	1.10518	0.0856227	0.510842	0.194382	Genetic information processing	Translation
P33913	yejA	Uncharacterized protein YejA	Periplasmic	1.10239	0.0179654	0.627278	0.0310224	Transport and binding proteins	Membrane transport
P0AEL6	fepB	Ferric enterobactin-binding periplasmic protein FepB (TC 3.A.1.14.2)	Periplasmic	1.10116	0.0395602	0.870955	0.0906487	Metabolism	Other pathways
P0A6B7	iscS	Cysteine desulfurase (EC 2.8.1.7), IscS subfamily	Insoluble/Membrane	1.08244	0.0339188	0.772416	0.252908	Metabolism	Other pathways
P06983	hemC	Porphobilinogen deaminase (PBG) (EC 2.5.1.61) (Hydroxymethylbilane synthase) (HMBS) (Pre-uroporphyrinogen synthase)	Cytoplasmic	1.07984	0.290361	0.286909	0.798947	Cellular processes	Cell signaling
P0A8R0	rraA	Ribonuclease E inhibitor RraA	Cytoplasmic	1.07804	0.0431521	0.658305	0.585017	Metabolism	Nucleotide metabolism
P15028	fecB	Iron(III) dicitrate transport system, periplasmic iron-binding protein FecB (TC 3.A.1.14.1)	Periplasmic	1.0721	0.0122523	0.952941	0.047235	Metabolism	Other pathways
P0AFZ3	sspB	Stringent starvation protein B	Insoluble/Membrane	1.07066	0.0393375	0.854611	0.0504787	Protein fate	Protein degradation
P77619	yfeW	Beta-lactamase class C and other penicillin binding proteins	Periplasmic	1.0676	0.00949304	1.28565	0.00617057	Cellular processes	Cellular processes
P0AFM9	pspB	Phage shock protein B	Insoluble/Membrane	1.06346	0.012572	0.390172	0.459138	Stress response	Phage shock
P0ABF1	pcnB	Poly(A) polymerase (EC 2.7.7.19)	Insoluble/Membrane	1.06319	0.116345	0.125146	0.798882	Metabolism	Nucleotide metabolism
P28304	qorA	Quinone oxidoreductase 1 (EC 1.6.5.5) (NADPH:quinone reductase 1) (Zeta-crystallin homolog protein)	Cytoplasmic	1.05935	0.37425			Stress response	Oxidative stress
P0AES2	gudD	Glucarate dehydratase (EC 4.2.1.40)	Cytoplasmic	1.0571	0.335107	OFF		Metabolism	Carbohydrate metabolism
P37147	fxsA	UPF0716 protein FxsA (Suppressor of F exclusion of phage T7)	Insoluble/Membrane	1.05669	0.0153205	1.0729	0.0125555	Uncategorized	Uncategorized
P0ABN1	dgkA	Diacylglycerol kinase (EC 2.7.1.107)	Insoluble/Membrane	1.05521	0.0357824	OFF		Metabolism	Lipid metabolism
P0ABH9	clpA	ATP-dependent Clp protease ATP-binding subunit ClpA	Cytoplasmic	1.05174	0.0132486	1.22405	0.050525	Protein fate	Protein degradation
P76297	flhE	Flagellar protein FlhE	Periplasmic	1.04862	0.000237283	1.46373	0.0203216	Cellular processes	Motility and chemotaxis
P0AG96	secE	Protein translocase subunit SecE	Insoluble/Membrane	1.04695	0.011356	0.386379	0.622523	Transport and binding proteins	Membrane transport
P0A9M0	lon	ATP-dependent protease La (EC 3.4.21.53) Type I	Cytoplasmic	1.04675	0.0147385	0.696619	0.0892355	Protein fate	Protein degradation
P08622	dnaJ	Chaperone protein DnaJ	Insoluble/Membrane	1.03875	0.0189503	1.09741	0.148206	Protein fate	Protein folding
P0DMC7	rcsB	DNA-binding capsular synthesis response regulator RcsB	Cytoplasmic	1.03749	0.0260876	0.581567	0.134123	Cellular processes	Cell signaling
P0A996	glpC	Anaerobic glycerol-3-phosphate dehydrogenase subunit C (EC 1.1.5.3)	Insoluble/Membrane	1.03666	0.11233	0.965698	0.0355661	Metabolism	Energy metabolism
P76251	dmlA	D-malic enzyme (EC 1.1.1.83)	Cytoplasmic	1.02892	0.0883159	1.02054	0.021642	Metabolism	Carbohydrate metabolism
P36548	amiA	N-acetylmuramoyl-L-alanine amidase (EC 3.5.1.28)	Periplasmic	1.02754	0.023926	0.730376	0.0193584	Cellular processes	Cell signaling
P08839	ptsI	Phosphoenolpyruvate-protein phosphotransferase of PTS system (EC 2.7.3.9)	Insoluble/Membrane	1.01235	0.0808104	1.84041	0.284623	Metabolism	Carbohydrate metabolism
P0ACQ4	oxyR	Hydrogen peroxide-inducible genes activator	Cytoplasmic	1.00312	0.281931	-0.670885	0.00593207	Metabolism	Other pathways
P16659	proS	Proline--tRNA ligase (EC 6.1.1.15) (Global RNA synthesis factor) (Prolyl-tRNA synthetase) (ProRS)	Insoluble/Membrane	1.00149	0.180927	1.05761	0.175043	Metabolism	Nucleotide metabolism
P0A8J8	rhlB	ATP-dependent RNA helicase RhlB	Cytoplasmic	0.953284	0.042974	1.16462	0.0590934	Genetic information processing	Translation
P0ABK9	nrfA	Cytochrome c552 precursor (EC 1.7.2.2)	Periplasmic	0.952883	0.026562	1.26427	0.0288326	Metabolism	Other pathways
P0A6F5	groEL	Heat shock protein 60 family chaperone GroEL	Insoluble/Membrane	0.940916	0.227001	1.43281	0.0367299	Protein fate	Protein folding
P0C0V0	degP	HtrA protease/chaperone protein	Periplasmic	1.52624	0.00112453	2.56	0.0446079	Protein fate	Protein degradation
P0A847	tgt	tRNA-guanine transglycosylase (EC 2.4.2.29)	Cytoplasmic	0.924112	0.159939	OFF		Genetic information processing	Translation
P0A9Y6	cspC	Cold shock protein CspC	Cytoplasmic	0.923614	0.0551377	1.48617	0.290921	Stress response	Cold shock
P0A9S3	gatD	Galactitol-1-phosphate 5-dehydrogenase (EC 1.1.1.251)	Insoluble/Membrane	0.920375	0.0483155	2.09488	0.172194	Metabolism	Carbohydrate metabolism
P0ACU5	fabR	HTH-type transcriptional repressor FabR	Cytoplasmic	0.89971	0.344995	1.1016	0.14492	Genetic information processing	Transcription
P0AFM2	proX	L-proline glycine betaine binding ABC transporter protein ProX (TC 3.A.1.12.1)	Periplasmic	0.894666	0.131345	1.11923	0.0512288	Transport and binding proteins	Membrane transport
P00959	metG	Methionine--tRNA ligase (EC 6.1.1.10) (Methionyl-tRNA synthetase) (MetRS)	Insoluble/Membrane	0.890146	0.174639	1.02708	0.520742	Genetic information processing	Translation
P0A7B5	proB	Glutamate 5-kinase (EC 2.7.2.11)	Cytoplasmic	0.886227	0.11233	1.13656	0.486133	Metabolism	Amino acid and protein metabolism
P0A972	cspE	Cold shock protein CspE	Cytoplasmic	0.87725	0.0943585	1.02824	0.336292	Stress response	Cold shock
P0ABT2	dps	Iron-binding ferritin-like antioxidant protein	Cytoplasmic	0.875664	0.0483237	1.07223	0.0115619	Stress response	Detoxification
P0ACP7	purR	Purine nucleotide synthesis repressor	Cytoplasmic	0.871545	0.0779329	1.16493	0.321127	Metabolism	Nucleotide metabolism
P0AE91	creA	Protein CreA (Catabolite regulation protein A)	Periplasmic	0.862454	0.0481497	1.18237	0.00252689	Uncategorized	Uncategorized
P0ABD8	accB	Biotin carboxyl carrier protein of acetyl-CoA carboxylase	Cytoplasmic	0.859373	0.175042	1.09235	0.175864	Metabolism	Lipid metabolism
P0AFN2	pspC	Phage shock protein C	Insoluble/Membrane	0.856375	0.138735	1.1847	0.359694	Stress response	Phage shock
P0AFK9	potD	ABC transporter, periplasmic spermidine putrescine-binding protein PotD (TC 3.A.1.11.1)	Periplasmic	0.848896	0.0113655	1.07112	0.00110655	Metabolism	Amino acid and protein metabolism
P69828	gatA	PTS system, galactitol-specific IIA component (EC 2.7.1.69)	Insoluble/Membrane	0.844192	0.0583879	1.38763	0.142391	Metabolism	Carbohydrate metabolism
Q46939	yqeF	Acetyl-CoA acetyltransferase (EC 2.3.1.9)	Cytoplasmic	0.840259	0.256159	OFF		Metabolism	Lipid metabolism
P64534	rcnB	Uncharacterized protein YohN precursor	Periplasmic	0.833043	0.187091	1.37494	0.0131538	Metabolism	Carbohydrate metabolism
P21599	pykA	Pyruvate kinase (EC 2.7.1.40)	Insoluble/Membrane	0.827947	0.0998801	1.21269	0.246121	Metabolism	Carbohydrate metabolism
P09147	galE	UDP-glucose 4-epimerase (EC 5.1.3.2)	Cytoplasmic	0.823279	0.161277	OFF		Metabolism	Carbohydrate metabolism
P0AG82	pstS	Phosphate ABC transporter, periplasmic phosphate-binding protein PstS (TC 3.A.1.7.1)	Periplasmic	0.813227	0.00124414	0.999788	0.000124544	Metabolism	Other pathways
P46859	gntK	Gluconokinase (EC 2.7.1.12)	Cytoplasmic	0.807699	0.376611	1.16374	0.349355	Metabolism	Carbohydrate metabolism
P31548	thiQ	Thiamin ABC transporter, ATPase component	Insoluble/Membrane	0.796485	0.0169925	OFF		Transport and binding proteins	Membrane transport
P0A6M8	fusA	Translation elongation factor G	Insoluble/Membrane	0.782884	0.0331617	1.50528	0.187035	Genetic information processing	Translation
P0ABX5	flgG	Flagellar basal-body rod protein FlgG	Periplasmic	0.773998	0.0242152	1.19038	0.00577055	Cellular processes	Motility and chemotaxis
P0A8B5	ybaB	FIG000557: hypothetical protein co-occurring with RecR	Cytoplasmic	0.756606	0.0627704	OFF		Genetic information processing	Transcription
P77318	ydeN	N-acetylgalactosamine-6-sulfatase (EC 3.1.6.4)	Periplasmic	0.746318	0.018669	1.05231	0.00558856	Metabolism	Carbohydrate metabolism
P76397	mdtA	Probable RND efflux membrane fusion protein	Insoluble/Membrane	0.741469	0.0314088	1.14552	0.0683328	Transport and binding proteins	Membrane transport
P0ACD4	iscU	Iron-sulfur cluster assembly scaffold protein IscU	Insoluble/Membrane	0.740395	0.19993	1.80494	0.135964	Metabolism	Other pathways
P11875	argS	Arginyl-tRNA synthetase (EC 6.1.1.19)	Cytoplasmic	0.739173	0.0815109	1.84616	0.257856	Genetic information processing	Translation
P52061	rdgB	Nucleoside 5-triphosphatase RdgB (dHAPTP, dITP, XTP-specific) (EC 3.6.1.15)	Cytoplasmic	0.734139	0.307893	1.24507	0.238101	Metabolism	Nucleotide metabolism
P68688	grxA	Glutaredoxin 1	Cytoplasmic	0.725761	0.140359	1.18964	0.0189679	Stress response	Cell redox homeostasis
P61316	lolA	Outer membrane lipoprotein carrier protein LolA	Periplasmic	0.720645	0.0137281	1.87849	0.00199385	Cell envelope	Cell wall components
P60546	gmk	Guanylate kinase (EC 2.7.4.8)	Cytoplasmic	0.719737	0.627198	OFF		Metabolism	Nucleotide metabolism
P0A7D7	purC	Phosphoribosylaminoimidazole-succinocarboxamide synthase (EC 6.3.2.6)	Insoluble/Membrane	0.716232	0.144241	1.54719	0.481212	Metabolism	Nucleotide metabolism
P0AA25	trxA	Thioredoxin-1 (Trx-1)	Insoluble/Membrane	0.118787	0.785468	2.01944	0.0347097	Stress response	Cell redox homeostasis
P0A9B2	gapA	NAD-dependent glyceraldehyde-3-phosphate dehydrogenase (EC 1.2.1.12)	Insoluble/Membrane	0.702931	0.311811	1.62176	0.234742	Metabolism	Energy metabolism
P0AAI5	fabF	3-oxoacyl-[acyl-carrier-protein] synthase, KASII (EC 2.3.1.179)	Insoluble/Membrane	0.675505	0.376821	2.42376	0.417302	Metabolism	Lipid metabolism
P0AE08	ahpC	Alkyl hydroperoxide reductase protein C (EC 1.6.4.-)	Insoluble/Membrane	0.671225	0.00504847	1.45571	0.213647	Metabolism	Other pathways
P12008	aroC	Chorismate synthase (EC 4.2.3.5)	Cytoplasmic	0.646008	0.293197	OFF		Metabolism	Amino acid and protein metabolism
P77304	dtpA	Di/tripeptide permease DtpA	Insoluble/Membrane	0.639335	0.347204	1.09221	0.0209482	Transport and binding proteins	Membrane transport
P0ADS6	yggE	Uncharacterized protein YggE	Periplasmic	0.638377	0.445106	3.12331	0.147814	Stress response	Oxidative stress
P0A759	nagB	Glucosamine-6-phosphate deaminase (EC 3.5.99.6)	Insoluble/Membrane	0.62107	0.379351	1.12418	0.212652	Metabolism	Amino acid and protein metabolism
P0AD61	pykF	Pyruvate kinase (EC 2.7.1.40)	Insoluble/Membrane	0.615757	0.209727	1.6535	0.235745	Metabolism	Carbohydrate metabolism
P0A8L1	serS	Seryl-tRNA synthetase (EC 6.1.1.11)	Insoluble/Membrane	0.595028	0.217961	1.19338	0.306385	Genetic information processing	Translation
P0A6K6	deoB	Phosphopentomutase (EC 5.4.2.7)	Insoluble/Membrane	0.563864	0.116442	1.02169	0.286196	Metabolism	Carbohydrate metabolism
P0ABJ9	cydA	Cytochrome d ubiquinol oxidase subunit I (EC 1.10.3.-)	Insoluble/Membrane	0.529796	0.0573621	1.02023	0.106965	Metabolism	Energy metabolism
P37197	yhjA	Cytochrome c551 peroxidase (EC 1.11.1.5)	Insoluble/Membrane	0.526268	0.0146121	1.6272	0.158632	Stress response	Oxidative stress
P0AGI4	xylH	Xylose ABC transporter, permease protein XylH	Insoluble/Membrane	0.469841	0.229342	OFF		Transport and binding proteins	Membrane transport
P0AFH8	osmY	Osmotically inducible protein OsmY	Periplasmic	0.454693	0.0555435	1.16037	0.139667	Protein fate	Protein folding
P0A9K9	slyD	FKBP-type peptidyl-prolyl cis-trans isomerase SlyD (EC 5.2.1.8)	Insoluble/Membrane	0.444941	0.17317	1.45478	0.251001	Protein fate	Protein folding
P30178	ybiC	Malate dehydrogenase (EC 1.1.1.37)	Cytoplasmic	0.444665	0.719142	OFF		Metabolism	Carbohydrate metabolism
P0A6Y8	dnaK	Chaperone protein DnaK	Insoluble/Membrane	0.417861	0.257951	1.09748	0.0444068	Protein fate	Protein folding
P0A6P1	tsf	Translation elongation factor Ts	Insoluble/Membrane	0.405773	0.235162	1.40155	0.331527	Genetic information processing	Translation
P04079	guaA	GMP synthase [glutamine-hydrolyzing] (EC 6.3.5.2) (GMP synthetase) (GMPS) (Glutamine amidotransferase)	Insoluble/Membrane	0.400569	0.246675	1.01564	0.414933	Metabolism	Amino acid and protein metabolism
P24251	crl	Sigma factor-binding protein Crl (Curlin genes transcriptional activatory protein)	Cytoplasmic	0.376968	0.835077	2.13008	0.20572	Genetic information processing	Transcription
P31663	panC	Pantoate--beta-alanine ligase (EC 6.3.2.1)	Cytoplasmic	0.360075	0.341152	1.0722	0.425505	Metabolism	Other pathways
P0A7D1	pth	Peptidyl-tRNA hydrolase (EC 3.1.1.29)	Cytoplasmic	0.323073	0.804631	-1.70145	0.385078	Genetic information processing	Translation
P0ADL3	yicN	Uncharacterized protein YicN	Insoluble/Membrane	0.315885	0.121932	1.16803	0.425013	Uncategorized	Uncategorized
P45395	kdsD	Arabinose 5-phosphate isomerase (EC 5.3.1.13)	Cytoplasmic	0.314332	0.820726	OFF		Cell envelope	Cell wall components
P25798	fliF	Flagellar M-ring protein FliF	Insoluble/Membrane	0.309523	0.437341	1.04122	0.016658	Cellular processes	Motility and chemotaxis
P18843	nadE	NAD synthetase (EC 6.3.1.5)	Insoluble/Membrane	0.295425	0.518625	1.724	0.394733	Metabolism	Nucleotide metabolism
P28903	nrdD	Ribonucleotide reductase of class III (anaerobic), large subunit (EC 1.17.4.2)	Cytoplasmic	0.290412	0.806479	2.34295	0.449812	Metabolism	Nucleotide metabolism
P77247	hxpB	Hexitol phosphatase B	Cytoplasmic	0.249212	0.773654	OFF		Metabolism	Carbohydrate metabolism
P0AB80	ilvE	Branched-chain amino acid aminotransferase (EC 2.6.1.42)	Cytoplasmic	0.239604	0.535433	OFF		Metabolism	Amino acid and protein metabolism
P0A763	ndk	Nucleoside diphosphate kinase (EC 2.7.4.6)	Insoluble/Membrane	0.236674	0.631543	1.49382	0.192246	Metabolism	Nucleotide metabolism
P23200	mglC	Galactose/methyl galactoside ABC transport system, permease protein MglC (TC 3.A.1.2.3)	Insoluble/Membrane	0.232323	0.401634	OFF		Transport and binding proteins	Membrane transport
P0A7I7	ribA	GTP cyclohydrolase II (EC 3.5.4.25)	Cytoplasmic	0.224508	0.781336	OFF		Metabolism	Other pathways
P24186	folD	Methylenetetrahydrofolate dehydrogenase (NADP+) (EC 1.5.1.5)	Cytoplasmic	0.210909	0.798854	OFF		Metabolism	Carbohydrate metabolism
P0A6A3	ackA	Acetate kinase (EC 2.7.2.1)	Insoluble/Membrane	0.203774	0.790092	1.44446	0.395784	Metabolism	Carbohydrate metabolism
P0ADT5	ygiC	Similarity with glutathionylspermidine synthase (EC 6.3.1.8), group 1	Cytoplasmic	0.197674	0.654395	1.30945	0.371264	Stress response	Cell redox homeostasis
P69801	manY	PTS system, mannose-specific IIC component	Insoluble/Membrane	0.193149	0.376856	-1.03481	0.218328	Transport and binding proteins	Membrane transport
P0AF16	murJ	Lipid II flippase MurJ (Peptidoglycan biosynthesis protein MurJ)	Insoluble/Membrane	0.173985	0.542664	OFF		Cell envelope	Cell wall components
P17846	cysI	Sulfite reductase [NADPH] hemoprotein beta-component (EC 1.8.1.2)	Cytoplasmic	0.171082	0.881613	-1.4936	0.316609	Metabolism	Other pathways
P0A6R3	fis	DNA-binding protein Fis	Cytoplasmic	0.169894	0.730872	1.14638	0.16428	Genetic information processing	Translation
P77376	ydgJ	Uncharacterized oxidoreductase YdgJ (EC 1.-.-.-)	Cytoplasmic	0.161017	0.733499	OFF		Metabolism	Energy metabolism
P0A799	pgk	Phosphoglycerate kinase (EC 2.7.2.3)	Insoluble/Membrane	0.160949	0.643103	1.04185	0.207467	Metabolism	Carbohydrate metabolism
P0AE12	amn	AMP nucleosidase (EC 3.2.2.4)	Cytoplasmic	0.159529	0.87112	OFF		Metabolism	Nucleotide metabolism
P0ACG1	stpA	DNA-binding protein StpA (H-NS homolog StpA)	Cytoplasmic	0.15513	0.858214	-1.60382	0.10527	Genetic information processing	Transcription
P0A9J0	rng	Cytoplasmic axial filament protein CafA and Ribonuclease G (EC 3.1.4.-)	Cytoplasmic	0.150397	0.906122	-1.95915	0.403992	Genetic information processing	Translation
P27302	tktA	Transketolase (EC 2.2.1.1)	Insoluble/Membrane	0.135268	0.761496	1.17797	0.118764	Metabolism	Carbohydrate metabolism
P0A7T3	rpsP	SSU ribosomal protein S16p	Cytoplasmic	0.130899	0.803996	1.01098	0.378349	Genetic information processing	Translation
P33920	yejK	Nucleoid-associated protein YejK	Cytoplasmic	0.117235	0.782114	-1.35608	0.14773	Genetic information processing	Transcription
P41409	rihA	Inosine-uridine preferring nucleoside hydrolase (EC 3.2.2.1)	Cytoplasmic	0.088205	0.921555	OFF		Metabolism	Nucleotide metabolism
P0AFJ1	phnA	Alkylphosphonate utilization operon protein PhnA	Cytoplasmic	0.0717068	0.835981	OFF		Metabolism	Other pathways
P00805	ansB	L-asparaginase (EC 3.5.1.1)	Periplasmic	0.0515265	0.929295	1.13005	0.062371	Metabolism	Amino acid and protein metabolism
P68066	grcA	Autonomous glycyl radical cofactor	Insoluble/Membrane	0.0294251	0.958586	1.83089	0.0545124	Metabolism	Amino acid and protein metabolism
P0A722	lpxA	Acyl-[acyl-carrier-protein]--UDP-N-acetylglucosamine O-acyltransferase (EC 2.3.1.129)	Cytoplasmic	0.0282505	0.98306	1.8448	0.587275	Cell envelope	Cell wall components
P45578	luxS	S-ribosylhomocysteine lyase (EC 4.4.1.21)	Insoluble/Membrane	0.0277191	0.91341	1.20196	0.307687	Cellular processes	Cell signaling
P0A825	glyA	Serine hydroxymethyltransferase (EC 2.1.2.1)	Insoluble/Membrane	0.0106594	0.983077	1.46756	0.0875574	Metabolism	Other pathways
P64448	ynbE	Uncharacterized protein YnbE	Insoluble/Membrane	0.00661825	0.98835	OFF		Uncategorized	Uncategorized
P75683	yagG	Xyloside transporter XynT	Insoluble/Membrane	0.0027504	0.990702	OFF		Transport and binding proteins	Membrane transport
P0A862	tpx	Thiol peroxidase, Tpx-type (EC 1.11.1.15)	Insoluble/Membrane	-0.00214419	0.992477	1.01713	0.370056	Stress response	Detoxification
P37646	pdeH	Cyclic di-GMP phosphodiesterase PdeH	Cytoplasmic	-0.00515583	0.994525	OFF		Cellular processes	Motility and chemotaxis
P27434	rodZ	Cytoskeleton protein RodZ	Cytoplasmic	-0.0184986	0.979086	1.48192	0.52678	Cellular processes	Cellular processes
P0ADR6	rlmM	Ribosomal RNA large subunit methyltransferase M (EC 2.1.1.186) (23S rRNA (cytidine2498-2'-O)-methyltransferase) (23S rRNA 2'-O-ribose methyltransferase RlmM)	Cytoplasmic	-0.0260868	0.973404	OFF		Genetic information processing	Translation
P0A6L0	deoC	Deoxyribose-phosphate aldolase (EC 4.1.2.4)	Insoluble/Membrane	-0.0317961	0.96748	1.49635	0.171723	Metabolism	Carbohydrate metabolism
P63389	yheS	Glutathione-regulated potassium-efflux system ATP-binding protein	Insoluble/Membrane	-0.0512954	0.951937	-1.12557	0.0759976	Transport and binding proteins	Membrane transport
P0AC86	glgP	Glycogen phosphorylase (EC 2.4.1.1)	Cytoplasmic	-0.0548342	0.93083	-2.15745	0.165579	Metabolism	Carbohydrate metabolism
P00887	aroH	2-keto-3-deoxy-D-arabino-heptulosonate-7-phosphate synthase I alpha (EC 2.5.1.54)	Cytoplasmic	-0.0562368	0.927436	OFF		Metabolism	Amino acid and protein metabolism
P0AGE4	sstT	Serine/threonine transporter SstT (Na(+)/serine-threonine symporter)	Insoluble/Membrane	-0.0678371	0.878856	OFF		Transport and binding proteins	Membrane transport
P76055	ttcA	tRNA(Cytosine32)-2-thiocytidine synthetase	Cytoplasmic	-0.0973212	0.828571	OFF		Metabolism	Amino acid and protein metabolism
P0A870	talB	Transaldolase (EC 2.2.1.2)	Insoluble/Membrane	-0.108128	0.802069	1.38588	0.251477	Metabolism	Carbohydrate metabolism
P21156	cysD	Sulfate adenylyltransferase subunit 2 (EC 2.7.7.4)	Cytoplasmic	-0.152986	0.898554	OFF		Metabolism	Other pathways
P69441	adk	Adenylate kinase (EC 2.7.4.3)	Insoluble/Membrane	-0.159582	0.767225	1.5755	0.139672	Metabolism	Nucleotide metabolism
P0AAC8	iscA	Iron-binding protein IscA (Iron-sulfur cluster assembly protein)	Cytoplasmic	-0.160836	0.62519	1.47459	0.21407	Metabolism	Other pathways
P0AC75	waaA	Lipid IVA 3-deoxy-D-manno-octulosonic acid transferase (EC 2.4.99.12) [often with (EC 2.4.99.13) also]	Insoluble/Membrane	-0.160846	0.337002	-1.01138	0.00953471	Cell envelope	Cell wall components
P27837	yifK	Probable transport protein YifK	Insoluble/Membrane	-0.169336	0.476722	OFF		Transport and binding proteins	Membrane transport
P0A9U6	puuR	Putrescine utilization regulator	Cytoplasmic	-0.169519	0.568171	OFF		Metabolism	Amino acid and protein metabolism
P0AF24	nagD	Phosphatase NagD predicted to act in N-acetylglucosamine utilization subsystem	Cytoplasmic	-0.173204	0.319278	-1.28098	0.0180997	Metabolism	Carbohydrate metabolism
P0A9J6	rbsK	Ribokinase (EC 2.7.1.15)	Cytoplasmic	-0.187028	0.814838	-1.18757	0.329716	Metabolism	Carbohydrate metabolism
P0AEG1	dppC	Dipeptide transport system permease protein DppC (TC 3.A.1.5.2)	Insoluble/Membrane	-0.192185	0.757194	1.1936	0.294825	Transport and binding proteins	Membrane transport
P0A9S1	fucO	Lactaldehyde reductase (EC 1.1.1.77)	Cytoplasmic	-0.208388	0.666108	OFF		Metabolism	Carbohydrate metabolism
P17993	ubiG	Ubiquinone biosynthesis O-methyltransferase (2-octaprenyl-6-hydroxyphenol methylase) (EC 2.1.1.222) (3-demethylubiquinone-8 3-O-methyltransferase) (EC 2.1.1.64)	Cytoplasmic	-0.212243	0.696634	OFF		Metabolism	Other pathways
P0AF06	motB	Flagellar motor rotation protein MotB	Insoluble/Membrane	-0.226914	0.646279	5.34288	0.0259909	Cellular processes	Motility and chemotaxis
P0ACL5	glcC	Glycolate utilization operon transcriptional activator GlcC	Cytoplasmic	-0.238998	0.560881	OFF		Metabolism	Carbohydrate metabolism
P30871	ygiF	Adenylate cyclase (EC 4.6.1.1)	Cytoplasmic	-0.239464	0.699584	-1.57969	0.0834314	Cellular processes	Cell signaling
P21645	lpxD	UDP-3-O-[3-hydroxymyristoyl] glucosamine N-acyltransferase (EC 2.3.1.191)	Cytoplasmic	-0.258492	0.821777	-1.50011	0.421654	Cell envelope	Cell wall components
P26608	fliS	Flagellar biosynthesis protein FliS	Cytoplasmic	-0.270065	0.763124	OFF		Cellular processes	Motility and chemotaxis
P0ACV0	lpxL	Lipid A biosynthesis lauroyl acyltransferase (EC 2.3.1.-)	Insoluble/Membrane	-0.282862	0.4759	OFF		Cell envelope	Cell wall components
P39180	flu	Antigen 43 (AG43) (Fluffing protein) [Cleaved into: Antigen 43 alpha chain; Antigen 43 beta chain]	Insoluble/Membrane	-0.313774	0.266841	5.7072	0.0161632	Cellular processes	Cellular processes
P28904	treC	Trehalose-6-phosphate hydrolase (EC 3.2.1.93)	Insoluble/Membrane	-0.342249	0.630565	1.46416	0.169553	Metabolism	Carbohydrate metabolism
P69054	sdhC	Succinate dehydrogenase cytochrome b-556 subunit	Insoluble/Membrane	-0.452985	0.499272	-1.27751	0.130976	Metabolism	Energy metabolism
P0AGD3	sodB	Superoxide dismutase [Fe] (EC 1.15.1.1)	Periplasmic	-0.541011	0.196703	1.06516	0.283849	Stress response	Oxidative stress
P0AET8	hdhA	7-alpha-hydroxysteroid dehydrogenase (7-alpha-HSDH) (EC 1.1.1.159)	Cytoplasmic	-0.55188	0.528609	OFF		Metabolism	Energy metabolism
P37051	purU	Formyltetrahydrofolate deformylase (EC 3.5.1.10)	Cytoplasmic	-0.555107	0.337337	OFF		Metabolism	Carbohydrate metabolism
P0AEB2	dacA	D-alanyl-D-alanine carboxypeptidase (EC 3.4.16.4)	Insoluble/Membrane	-0.64418	0.0035187	-1.00764	0.0361532	Cell envelope	Cell wall components
P23882	fmt	Methionyl-tRNA formyltransferase (EC 2.1.2.9)	Cytoplasmic	-0.654789	0.215718	-1.24406	0.0366046	Genetic information processing	Translation
P0AGK1	ubiA	4-hydroxybenzoate polyprenyltransferase (EC 2.5.1.39)	Insoluble/Membrane	-0.658532	0.23467	OFF		Metabolism	Other pathways
P77581	astC	Succinylornithine transaminase (EC 2.6.1.81)	Cytoplasmic	-0.67019	0.197747	-1.88585	0.0567415	Metabolism	Amino acid and protein metabolism
P76149	sad	Succinate semialdehyde dehydrogenase [NAD(P)+] Sad (SSADH) (SSDH) (EC 1.2.1.16)	Cytoplasmic	-0.671887	0.611758	OFF		Metabolism	Amino acid and protein metabolism
P0A955	eda	2-dehydro-3-deoxyphosphogluconate aldolase (EC 4.1.2.14)	Insoluble/Membrane	-0.712357	0.0133842	1.52348	0.210874	Metabolism	Carbohydrate metabolism
P14407	fumB	Fumarate hydratase class I, anaerobic (EC 4.2.1.2)	Cytoplasmic	-0.731193	0.0820258	OFF		Metabolism	Carbohydrate metabolism
P42593	fadH	2,4-dienoyl-CoA reductase [NADPH] (EC 1.3.1.34)	Cytoplasmic	-0.755668	0.295469	-1.33956	0.16939	Metabolism	Lipid metabolism
P76142	lsrB	Autoinducer 2 (AI-2) ABC transport system, periplasmic AI-2 binding protein LsrB	Periplasmic	-0.773049	0.00935225	-1.34201	0.00693751	Transport and binding proteins	Membrane transport
P21151	fadA	Acetyl-CoA acetyltransferase (EC 2.3.1.9)	Cytoplasmic	-0.819621	0.143241	-1.13167	0.0242334	Metabolism	Lipid metabolism
P51024	yaiL	Uncharacterized protein YaiL	Cytoplasmic	-0.832512	0.546483	OFF		Uncategorized	Uncategorized
P75694	yahO	Uncharacterized protein YahO	Periplasmic	-0.861093	0.0982266	-1.01324	0.0112571	Uncategorized	Uncategorized
P0A9J8	pheA	Chorismate mutase I (EC 5.4.99.5)	Cytoplasmic	-0.873142	0.470403	OFF		Metabolism	Amino acid and protein metabolism
P0A858	tpiA	Triosephosphate isomerase (EC 5.3.1.1)	Insoluble/Membrane	-0.904849	0.429439	1.0912	0.296074	Metabolism	Carbohydrate metabolism
P76007	cvrA	K(+)/H(+) antiporter NhaP2 (Potassium/proton antiporter NhaP2)	Insoluble/Membrane	-0.92101	0.00285277	-1.4401	0.00254739	Uncategorized	Uncategorized
P76621	csiD	Protein CsiD	Cytoplasmic	-0.924801	0.00145943	-1.95561	0.000958068	Metabolism	Energy metabolism
P0AFI2	parC	Topoisomerase IV subunit A (EC 5.99.1.-)	Cytoplasmic	-0.9619	0.646188	-2.72388	0.442202	Genetic information processing	Transcription
P06993	malT	Transcriptional activator of maltose regulon, MalT	Cytoplasmic	-0.97636	0.0177376	-1.15442	0.0834741	Transport and binding proteins	Membrane transport
P0A7E1	pyrD	Dihydroorotate dehydrogenase (EC 1.3.3.1)	Insoluble/Membrane	-0.976485	0.0101696	-1.27584	0.00546549	Metabolism	Nucleotide metabolism
P0AAE2	proY	Proline-specific permease proY	Insoluble/Membrane	-1.00319	0.0234891			Metabolism	Amino acid and protein metabolism
P75849	gloC	Hydroxyacylglutathione hydrolase GloC (EC 3.1.2.6) (Accessory type II glyoxalase) (Glyoxalase II 2) (GlxII-2)	Cytoplasmic	-1.00553	0.346799	1.44347	0.513509	Stress response	Detoxification
P0AD12	yeeZ	Protein YeeZ	Periplasmic	-1.01628	0.0198869	-0.926923	0.000771851	Metabolism	Other pathways
P76270	msrC	Free methionine-R-sulfoxide reductase (fRMsr) (EC 1.8.4.14)	Cytoplasmic	-1.03747	0.171058	1.32947	0.224353	Stress response	Oxidative stress
P07118	valS	Valine--tRNA ligase (EC 6.1.1.9) (Valyl-tRNA synthetase) (ValRS)	Cytoplasmic	-1.05186	0.366892	-0.772569	0.459463	Genetic information processing	Translation
P0A7X6	rimM	16S rRNA processing protein RimM	Insoluble/Membrane	-1.05955	0.377712			Genetic Information Processing	Translation
P45800	yrfF	Putative membrane protein IgaA homolog	Insoluble/Membrane	-1.10464	0.0867108	-0.721962	0.139597	Uncategorized	Uncategorized
P0ADR8	ygdH	LOG family protein YgdH	Cytoplasmic	-1.10482	0.288048	-1.30781	0.251693	Metabolism	Amino acid and protein metabolism
P00562	metL	Homoserine dehydrogenase (EC 1.1.1.3)	Insoluble/Membrane	-1.11082	0.0204587	-2.03045	0.00681812	Metabolism	Amino acid and protein metabolism
P76037	puuP	Putrescine importer	Insoluble/Membrane	-1.13877	0.0307231	-1.70142	0.0153651	Metabolism	Amino acid and protein metabolism
P08244	pyrF	Orotidine 5'-phosphate decarboxylase (EC 4.1.1.23)	Cytoplasmic	-1.14384	0.0276251	-0.321721	0.175902	Metabolism	Nucleotide metabolism
P45464	lpoA	Penicillin-binding protein activator LpoA (PBP activator LpoA) (Lipoprotein activator of PBP from the outer membrane A)	Insoluble/Membrane	-1.15016	0.00579794	-0.679263	0.0193048	Cell envelope	Cell wall components
P76143	lsrF	Autoinducer 2 (AI-2) aldolase LsrF (EC 4.2.1.-)	Cytoplasmic	-1.15369	0.165616	-3.15357	0.0734732	Cellular processes	Cell signaling
P0AFB8	glnG	Nitrogen regulation protein NR(I)	Cytoplasmic	-1.17312	0.276835	OFF		Cellular processes	Cell signaling
P0AEI4	rimO	Ribosomal protein S12p Asp88 (E. coli) methylthiotransferase	Cytoplasmic	-1.17432	0.0324407	1.32356	0.552979	Genetic information processing	Translation
P39267	yjcZ	Uncharacterized protein YjcZ	Cytoplasmic	-1.20733	0.374189	0.41779	0.571295	Uncategorized	Uncategorized
P60560	guaC	GMP reductase (EC 1.7.1.7)	Cytoplasmic	-1.2395	0.16197	-1.24818	0.0872946	Metabolism	Amino acid and protein metabolism
P0A746	msrB	Peptide methionine sulfoxide reductase MsrB (EC 1.8.4.12)	Cytoplasmic	-1.26177	0.33106	-0.592511	0.549987	Stress response	Oxidative stress
P52647	ydbK	Pyruvate-flavodoxin oxidoreductase (EC 1.2.7.-)	Cytoplasmic	-1.28387	0.104198			Metabolism	Carbohydrate Metabolism
P23522	garL	2-dehydro-3-deoxyglucarate aldolase (EC 4.1.2.20)	Cytoplasmic	-1.2899	0.0515068	-0.705671	0.439546	Metabolism	Carbohydrate metabolism
P0AAQ2	yajD	Uncharacterized protein YajD	Cytoplasmic	-1.29513	0.289569	0.879158	0.161429	Uncategorized	Uncategorized
P39285	mscM	Potassium efflux system KefA protein	Insoluble/Membrane	-1.31116	0.0262763	-1.18662	0.016229	Metabolism	Other pathways
P32705	actP	Acetate permease ActP (cation/acetate symporter)	Insoluble/Membrane	-1.31306	0.0615889	-0.505987	0.199396	Metabolism	Carbohydrate metabolism
P0A905	slyB	Outer membrane lipoprotein SlyB	Insoluble/Membrane	-1.32456	0.114909	-1.30687	0.12063	Cellular processes	Cell signaling
P76085	paaK	Phenylacetate-coenzyme A ligase (EC 6.2.1.30) PaaF	Cytoplasmic	-1.33166	0.00873679	-1.70081	0.046529	Metabolism	Other pathways
P23865	prc	Tail-specific protease (EC 3.4.21.102) (C-terminal-processing peptidase) (PRC protein) (Protease Re)	Insoluble/Membrane	-1.38667	0.0130449	-1.7153	0.011157	Metabolism	Amino acid and protein metabolism
P69451	fadD	Long-chain-fatty-acid--CoA ligase (EC 6.2.1.3)	Insoluble/Membrane	-1.39071	0.000239949	-1.13337	0.00928243	Metabolism	Other pathways
P23857	pspE	Phage shock protein E precursor	Periplasmic	-1.39084	0.0102269	-1.02641	0.0851856	Stress response	Phage shock
P0A855	tolB	tolB protein precursor, periplasmic protein involved in the tonb-independent uptake of group A colicins	Periplasmic	-1.41642	0.00668406	-2.77434	0.000592493	Transport and binding proteins	Membrane transport
P04995	sbcB	Exodeoxyribonuclease I (EC 3.1.11.1)	Cytoplasmic	-1.4409	0.250589	OFF		Metabolism	Nucleotide metabolism
P39406	rsmC	Ribosomal RNA small subunit methyltransferase C (EC 2.1.1.172) (16S rRNA m2G1207 methyltransferase) (rRNA (guanine-N(2)-)-methyltransferase RsmC)	Insoluble/Membrane	-1.44593	0.418701	-0.879941	0.547217	Genetic information processing	Transcription
P0ACP1	cra	Fructose repressor FruR, LacI family	Cytoplasmic	-1.48816	0.0670891	-0.595653	0.434693	Metabolism	Carbohydrate metabolism
P0A7F3	pyrI	Aspartate carbamoyltransferase regulatory chain (PyrI)	Cytoplasmic	-1.50467	0.000447038	-2.31568	0.000492196	Metabolism	Amino acid and protein metabolism
P33136	mdoG	Glucans biosynthesis protein G precursor	Periplasmic	-1.66662	0.242957	-2.66485	0.180436	Transport and binding proteins	Membrane transport
P18133	pncB	Nicotinate phosphoribosyltransferase (EC 2.4.2.11)	Periplasmic	-1.6698	0.0196852	-1.66379	0.024635	Metabolism	Other pathways
P21170	speA	Biosynthetic arginine decarboxylase (EC 4.1.1.19)	Periplasmic	-1.69987	0.0422863	-2.36064	0.0183115	Metabolism	Amino acid and protein metabolism
P0A786	pyrB	Aspartate carbamoyltransferase (EC 2.1.3.2)	Cytoplasmic	-1.73125	0.0176466	-1.75004	0.0230273	Metabolism	Amino acid and protein metabolism
P09151	leuA	2-isopropylmalate synthase (EC 2.3.3.13)	Cytoplasmic	-1.78654	0.561478	-2.23882	0.528986	Metabolism	Amino acid and protein metabolism
P08957	hsdM	Type I restriction-modification system, DNA-methyltransferase subunit M (EC 2.1.1.72)	Cytoplasmic	-1.84132	0.0975323	-0.84954	0.287964	Metabolism	Nucleotide metabolism
P08192	folC	Folylpolyglutamate synthase (EC 6.3.2.17)	Cytoplasmic	-1.85523	0.591812	-2.08953	0.574953	Metabolism	Energy metabolism
P25665	metE	5-methyltetrahydropteroyltriglutamate--homocysteine methyltransferase (EC 2.1.1.14)	Cytoplasmic	-2.21997	0.309516	-1.55343	0.375433	Metabolism	Amino acid and protein metabolism
P0A9W9	yrdA	Protein YrdA	Cytoplasmic	-2.25982	0.338425	OFF		Cellular processes	Cell signaling
P0AFS1	lsrD	Autoinducer 2 (AI-2) ABC transport system, membrane channel protein LsrD	Insoluble/Membrane	-2.42263	0.404333			Cellular processes	Cell signaling
P23883	puuC	Gamma-glutamyl-aminobutyraldehyde dehydrogenase (EC 1.2.1.-)	Cytoplasmic	-2.48257	0.00409498	-1.94311	0.0105999	Metabolism	Amino acid and protein metabolism
P25714	yidC	Membrane protein insertase YidC (Foldase YidC) (Inner membrane protein YidC) (Membrane integrase YidC) (Oxa1Ec)	Insoluble/Membrane	-2.28631	0.0253467	-2.57496	0.0153347	Transport and binding proteins	Membrane transport
P50457	puuE	Gamma-aminobutyrate:alpha-ketoglutarate aminotransferase (EC 2.6.1.19)	Cytoplasmic	-2.72582	0.0068492	-1.97882	0.0135359	Metabolism	Amino acid and protein metabolism
P0ADP0	yigB	5-amino-6-(5-phospho-D-ribitylamino)uracil phosphatase YigB (EC 3.1.3.-)	Cytoplasmic	-3.2826	0.162227			Metabolism	Other Pathways
P03841	malM	Maltose operon periplasmic protein MalM	Periplasmic	-3.57573	0.0205002	-3.37841	0.0200366	Transport and binding proteins	Membrane transport
P23843	oppA	Oligopeptide ABC transporter, periplasmic oligopeptide-binding protein OppA (TC 3.A.1.5.1)	Periplasmic	-3.67713	0.0102537	-2.96676	0.00745861	Transport and binding proteins	Membrane transport
P0AEX9	malE	Maltose/maltodextrin ABC transporter, substrate binding periplasmic protein MalE	Periplasmic	-3.79737	0.0223976	-4.27985	0.0220669	Transport and binding proteins	Membrane transport
P39401	mdoB	Phosphoglycerol transferase I (EC 2.7.8.20)	Insoluble/Membrane	-4.58511	0.0132673	-4.70909	0.0124332	Transport and binding proteins	Membrane transport
P23847	dppA	Dipeptide-binding ABC transporter, periplasmic substrate-binding component (TC 3.A.1.5.2)	Periplasmic	-5.74248	0.00989927	-5.60313	0.00961649	Transport and binding proteins	Membrane transport
P37745	rfbC	dTDP-4-dehydrorhamnose 3,5-epimerase (EC 5.1.3.13) (Thymidine diphospho-4-keto-rhamnose 3,5-epimerase) (dTDP-4-keto-6-deoxyglucose 3,5-epimerase) (dTDP-6-deoxy-D-xylo-4-hexulose 3,5-epimerase) (dTDP-L-rhamnose synthase)	Cytoplasmic			-1.0169	0.311088	Cell envelope	Cell wall components
P33362	yehZ	Osmoprotectant ABC transporter binding protein YehZ	Periplasmic			ON		Transport and binding proteins	Membrane transport
P75788	ybiR	Inner membrane protein YbiR	Insoluble/Membrane			OFF		Transport and binding proteins	Membrane transport
P37019	clcA	H(+)/Cl(-) exchange transporter ClcA (ClC-ec1)	Insoluble/Membrane			OFF		Transport and binding proteins	Membrane transport
P0ACC3	erpA	Iron-sulfur cluster insertion protein ErpA	Insoluble/Membrane			1.81626	0.261686	Metabolism	Other pathways
P0A8J4	ybeD	Proposed lipoate regulatory protein YbeD	Cytoplasmic			1.10132	0.280436	Metabolism	Other pathways
P23869	ppiB	Peptidyl-prolyl cis-trans isomerase B (PPIase B) (EC 5.2.1.8) (Rotamase B)	Insoluble/Membrane			1.42669	0.0967509	Protein fate	Protein folding
P0AE52	bcp	Thiol peroxidase, Bcp-type (EC 1.11.1.15)	Cytoplasmic			2.08197	0.00421448	Stress response	Cell redox homeostasis
P33018	yeiG	S-formylglutathione hydrolase (EC 3.1.2.12)	Cytoplasmic			1.44418	0.562238	Stress response	Detoxification

## Sheet: Description
Abbreviation
Strains:
C	E. coli CyDisCo
scFv	E. coli CyDisCo expressing sp-scFv
mscFv	E. coli CyDisCo expressing misfolded sp-scFv
ON	proteins identified in 3 replicates of E. coli CyDisCo expressing scFv or misfolded scFv, not identified in the E. coli CyDisCo (control)
OFF	proteins identified in 3 replicates of E. coli CyDisCo, not identified in E. coli CyDisCo expressing scFv or misfolded scFv
Additional information
Fold change was calculated by dividing the mean value (from 3 replicates) of the mutant value by the mean value of the wild type
